# Supplementary material for: Enantioselective synthesis of 2-amino-4H-chromene derivatives with antifungal activities on phytopathogenic fungi
Source: Royal Society of Chemistry journal article supplement (doi:10.1039/d4qo00686k), 2024-01-01
Supplement: d4qo00686k1.pdf [file d4qo00686k1.pdf]

## Supporting Information

### Enantioselective synthesis of 2-amino-4*H*-chromene derivatives with antifungal activities on phytopathogenic fungi

Man Zhang <sup>a,‡</sup>, Yifan Ru <sup>a,‡</sup>, Shilin Wang <sup>a</sup>, Wen Fu <sup>a</sup>, Tianyu Li <sup>a</sup>, Xusheng Shao <sup>a</sup>, Zhong Li <sup>a</sup>,  
Wu-Lin Yang <sup>a</sup>

<sup>a</sup> Shanghai Key Laboratory of Chemical Biology & School of Pharmacy, East China University of Science and Technology, 130 Meilong Road, Shanghai 200237, P. R. China

Email: yangwl@ecust.edu.cn

<sup>‡</sup>These authors contributed equally.

#### Table of Contents

|                                                                                    |      |
|------------------------------------------------------------------------------------|------|
| 1. General information                                                             | S2   |
| 2. Optimization study                                                              | S3   |
| 3. Synthesis and characterization data of 2-amino-4 <i>H</i> -chromene derivatives | S5   |
| 4. Gram-scale preparation of products 47 and 63                                    | S35  |
| 5. Synthetic transformations of product 47                                         | S36  |
| 6. Antifungal activities evaluation                                                | S38  |
| 7. References                                                                      | S41  |
| 8. <sup>1</sup> H NMR, <sup>13</sup> C NMR and <sup>19</sup> F NMR spectra         | S42  |
| 9. HPLC chromatograms                                                              | S121 |

## 1. General information

<sup>1</sup>H NMR spectra were recorded on a Bruker DPX 400 MHz spectrometer in CDCl<sub>3</sub>. Chemical shifts are reported in ppm with the internal CDCl<sub>3</sub> signal at 7.26 ppm as a standard. The spectra are interpreted as: s, singlet; brs, broad singlet; d, doublet; t, triplet; m, multiplet; dd, double doublet; ddd, double double doublet; td, triple doublet; coupling constant(s) *J* are reported in Hz and relative integrations are reported. <sup>13</sup>C NMR (100 MHz) spectrum were recorded on a Bruker DPX 400 MHz spectrometer in CDCl<sub>3</sub>. Chemical shifts are reported in ppm with the internal chloroform signal at 77.16 ppm as a standard; <sup>19</sup>F NMR (376 MHz) spectra were recorded on a Bruker DPX 400 MHz spectrometer in CDCl<sub>3</sub> and referenced relative to CFCl<sub>3</sub>. Optical rotations were measured on an AUTOPOL V. Enantiomeric excesses were determined by analysis of HPLC traces, obtained by using Chiralpak AS-H, AD-H, IC, columns with *n*-hexane and ethanol as solvents (Chiralpak AS-H, AD-H, IC, were purchased from Daicel Chiral Technologies (China) Co., Ltd.). Melting points were obtained in open capillary tubes using Buchi melting point B540 which were uncorrected. High-resolution mass spectra (HRMS) were recorded on a Waters GCT Premier mass spectrometer using EI-TOF and ESI-TOF (electron ionization-time of flight). Commercially available materials purchased from Adamas-beta and Bidepharm, which were used as received. Solvent was purified according to the procedure from *Purification of Laboratory Chemicals*. [Ir(cod)Cl]<sub>2</sub> and malononitrile was purchased from Bidepharm. Carreira's ligand (*S*)-**L1** was prepared according to the literature procedure.<sup>[1]</sup> Substrates 2-(1-hydroxyallyl)phenols ( $\pm$ )-**1**<sup>[2]</sup> and (*E*)-1-(methylthio)-2-nitroenamines **2**<sup>[3]</sup> were prepared according to the literature procedures.

## 2. Optimization study

**Table S1 Screening of the solvents and additive**

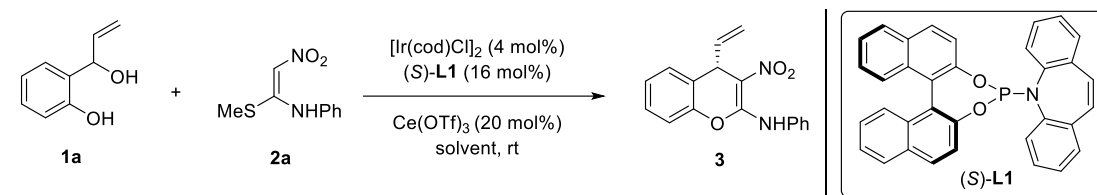

| entry <sup>[a]</sup> | solvent                         | additive | yield (%) <sup>[b]</sup> | ee (%) <sup>[c]</sup> |
|----------------------|---------------------------------|----------|--------------------------|-----------------------|
| 1                    | CH <sub>2</sub> Cl <sub>2</sub> | no       | 98                       | 96                    |
| 2                    | THF                             | no       | 83                       | 95                    |
| 3                    | CH <sub>3</sub> CN              | no       | 68                       | 92                    |
| 4                    | DCE                             | no       | 91                       | 95                    |
| 5                    | toluene                         | no       | 84                       | 95                    |
| 6                    | CH <sub>2</sub> Cl <sub>2</sub> | 3Å MS    | 59                       | 85                    |
| 7                    | CH <sub>2</sub> Cl <sub>2</sub> | 4Å MS    | 64                       | 84                    |
| 8                    | CH <sub>2</sub> Cl <sub>2</sub> | 5Å MS    | 74                       | 86                    |

[a] Unless others stated, the reactions were performed with **2a** (0.10 mmol), **1a** (0.20 mmol), [Ir(cod)Cl]<sub>2</sub> (4 mol %), (*S*)-L1 (16 mol %), and Ce(OTf)<sub>3</sub> (20 mol %) in CH<sub>2</sub>Cl<sub>2</sub> (1.5 mL) at room temperature. [b] Yield of isolated product **3**. [c] The ee value was determined by chiral HPLC analysis.

**Table S2 Optimization of the reaction conditions**

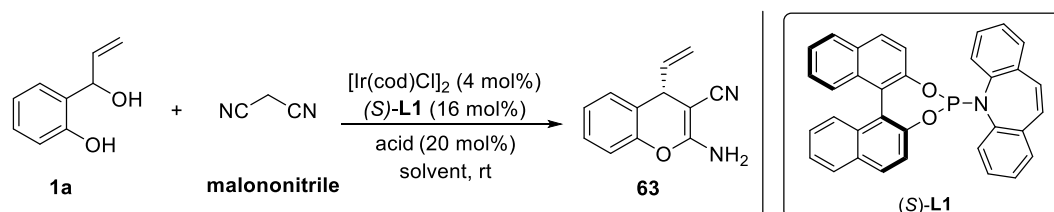

| entry <sup>[a]</sup> | acid promoter                                                             | solvent                         | yield (%) <sup>[b]</sup> | ee (%) <sup>[c]</sup> |
|----------------------|---------------------------------------------------------------------------|---------------------------------|--------------------------|-----------------------|
| 1                    | Ce(OTf) <sub>3</sub>                                                      | CH <sub>2</sub> Cl <sub>2</sub> | 40                       | 56                    |
| 2                    | Yb(OTf) <sub>3</sub>                                                      | CH <sub>2</sub> Cl <sub>2</sub> | 59                       | 56                    |
| 3                    | Yb(OTf) <sub>3</sub>                                                      | CH <sub>3</sub> CN              | 33                       | 81                    |
| 4                    | Yb(OTf) <sub>3</sub>                                                      | toluene                         | 54                       | 50                    |
| 5                    | Yb(OTf) <sub>3</sub>                                                      | 1,4-dioxane                     | 53                       | 82                    |
| 6                    | Yb(OTf) <sub>3</sub>                                                      | THF                             | 56                       | 82                    |
| 7                    | CF <sub>3</sub> CO <sub>2</sub> H                                         | THF                             | 32                       | 69                    |
| 8                    | <i>o</i> -NO <sub>2</sub> C <sub>6</sub> H <sub>4</sub> CO <sub>2</sub> H | THF                             | 42                       | 86                    |
| 9                    | Ce(OTf) <sub>3</sub>                                                      | THF                             | 50                       | 83                    |
| 10                   | La(OTf) <sub>3</sub>                                                      | THF                             | 48                       | 81                    |

|    |                      |     |    |    |
|----|----------------------|-----|----|----|
| 11 | Lu(OTf) <sub>3</sub> | THF | 85 | 83 |
| 12 | Dy(OTf) <sub>3</sub> | THF | 39 | 81 |
| 13 | Er(OTf) <sub>3</sub> | THF | 46 | 79 |
| 14 | Nd(OTf) <sub>3</sub> | THF | 73 | 88 |

[a] Unless others stated, the reactions were performed with malononitrile (0.10 mmol), **1a** (0.20 mmol), [Ir(cod)Cl]<sub>2</sub> (4 mol %), (*S*)-**L1** (16 mol %), and Nd(OTf)<sub>3</sub> (20 mol %) in THF (1.5 mL) at room temperature. [b] Yield of isolated product **63**. [c] The ee value was determined by chiral HPLC analysis.

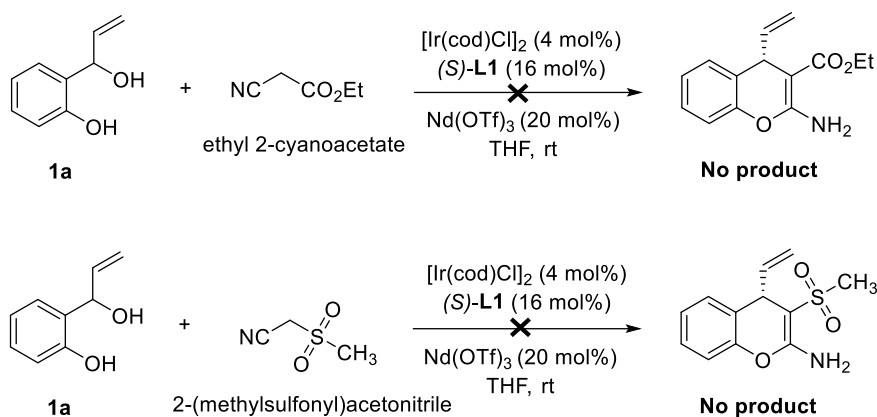

**Scheme S1** Unsuccessful reactions



### 3. Synthesis and characterization data of 2-amino-4*H*-chromene derivatives

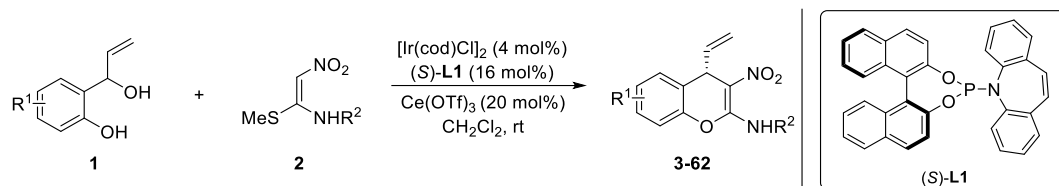

**General procedure A:** Under a nitrogen atmosphere, a flame dried 10 mL Schlenk tube was charged with  $[\text{Ir}(\text{cod})\text{Cl}]_2$  (2.7 mg, 0.004 mmol, 4 mol%), Carreira's ligand (*S*)-**L1** (8.2 mg, 0.016 mmol, 16 mol%). After the tube was evacuated and backfilled with nitrogen, freshly distilled  $\text{CH}_2\text{Cl}_2$  (1.5 mL) was added, then stirred at room temperature for 15 minutes while the solution turned dark red. Then, 2-(1-hydroxyallyl)phenols **1** (0.2 mmol, 2.0 equiv) were added and the reaction mixture immediately turned light yellow. 1-(Methylthio)-2-nitroenamines **2** (0.1 mmol, 1.0 equiv) and  $\text{Ce}(\text{OTf})_3$  (11.74 mg, 0.02 mmol, 20 mol%) were added sequentially. The reaction mixture was stirred at room temperature until **2** were consumed (monitored by TLC), which was directly purified by flash column chromatography silica gel ( $\text{CH}_2\text{Cl}_2$  or petroleum ether/ethyl acetate = 4/1) to afford products **3-62**.

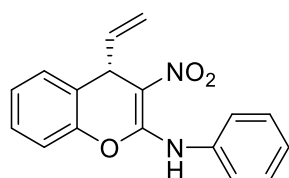

**(S)-3-Nitro-*N*-phenyl-4-vinyl-4*H*-chromen-2-amine (3):** Following the general procedure **A**, compound **3a** was obtained as a yellow solid in 98% yield (28.8 mg), 96% ee;  $R_f = 0.6$  ( $\text{CH}_2\text{Cl}_2$ ); m.p: 105 – 107 °C;  $^1\text{H NMR}$  (400 MHz,  $\text{CDCl}_3$ )  $\delta$  12.26 (brs, 1H), 7.45 – 7.42 (m, 4H), 7.32 – 7.25 (m, 3H), 7.24 – 7.19 (m, 1H), 7.08 (d,  $J = 8.0$  Hz, 1H), 5.92 (ddd,  $J = 16.7, 10.0, 6.6$  Hz, 1H), 5.10 (d,  $J = 9.8$  Hz, 1H), 5.04 (d,  $J = 16.8$  Hz, 1H), 5.02 (d,  $J = 6.6$  Hz, 1H).  $^{13}\text{C NMR}$  (100 MHz,  $\text{CDCl}_3$ )  $\delta$  156.9, 148.1, 137.2, 135.2, 129.7, 129.5(2C), 128.6, 126.6, 126.1, 123.3(1), 123.3(0) (2C), 116.3, 115.8, 108.2, 39.6. **HRMS** (EI-TOF)  $m/z$ :  $[\text{M}]^+$  calcd for  $\text{C}_{17}\text{H}_{14}\text{N}_2\text{O}_3$ : 294.0999, found: 294.1006;  $[\alpha]_D^{25} = +19.0$  ( $c$  0.20,  $\text{CH}_2\text{Cl}_2$ ); **HPLC** (Chiralpak AS-H, *n*-hexane/ethanol = 80/20, flow rate = 1.0 mL/min,  $\lambda = 220$  nm)  $t_R = 8.466$  min (minor), 15.350 min (major).

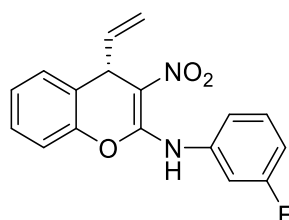

**(S)-*N*-(3-Fluorophenyl)-3-nitro-4-vinyl-4*H*-chromen-2-amine (4):** Following the general procedure **A**, compound **4** was obtained as a yellow solid in 83% yield (25.9 mg), 95% ee;  $R_f = 0.6$  ( $\text{CH}_2\text{Cl}_2$ ); m.p: 136 – 138 °C;  $^1\text{H NMR}$  (400 MHz,  $\text{CDCl}_3$ )  $\delta$  12.26 (brs, 1H), 7.45 – 7.35 (m, 1H), 7.33 – 7.24 (m, 4H), 7.17 (d,  $J = 8.0$  Hz, 1H), 7.12 (d,  $J = 7.9$  Hz, 1H), 7.02 – 6.97 (m, 1H), 5.91 (ddd,  $J = 16.8, 10.0, 6.6$  Hz, 1H), 5.12 (d,  $J = 10.0$  Hz, 1H), 5.07 (d,  $J = 17.1$  Hz, 1H),

5.01 (d,  $J = 6.6$  Hz, 1H).  $^{13}\text{C}$  NMR (100 MHz,  $\text{CDCl}_3$ )  $\delta$  163.1 (d,  $^1J_{\text{C-F}} = 246.9$  Hz), 156.6, 148.0, 137.1, 136.8 (d,  $^3J_{\text{C-F}} = 10.4$  Hz), 130.7 (d,  $^3J_{\text{C-F}} = 9.2$  Hz), 129.8, 128.7, 126.3, 123.2, 118.7 (d,  $^4J_{\text{C-F}} = 3.2$  Hz), 116.1 (d,  $^2J_{\text{C-F}} = 32.8$  Hz), 113.3 (d,  $^2J_{\text{C-F}} = 21.3$  Hz), 110.6, 110.4, 108.7, 39.5.  $^{19}\text{F}$  NMR (376 MHz,  $\text{CDCl}_3$ )  $\delta$  -110.48 – -110.55(m). HRMS (EI-TOF)  $m/z$ :  $[\text{M}]^+$  calcd for  $\text{C}_{17}\text{H}_{13}\text{FN}_2\text{O}_3$ : 312.0905, found: 312.0912;  $[\alpha]_{\text{D}}^{25} = +22.9$  ( $c$  0.20,  $\text{CH}_2\text{Cl}_2$ ); HPLC (Chiralpak AS-H,  $n$ -hexane/ethanol = 80/20, flow rate = 1.0 mL/min,  $\lambda = 220$  nm)  $t_{\text{R}} = 7.218$  min (minor), 13.914 min (major).

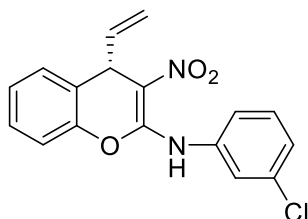

**(S)-N-(3-Chlorophenyl)-3-nitro-4-vinyl-4H-chromen-2-amine (5)**: Following the general procedure A, compound **5** was obtained as a yellow solid in 78% yield (25.6 mg), 89% ee;  $R_{\text{f}} = 0.6$  ( $\text{CH}_2\text{Cl}_2$ ); m.p: 131 – 133 °C;  $^1\text{H}$  NMR (400 MHz,  $\text{CDCl}_3$ )  $\delta$  12.18 (brs, 1H), 7.49 (s, 1H), 7.39 – 7.35(m, 1H), 7.33 – 7.20 (m, 5H), 7.09 (d,  $J = 7.8$  Hz, 1H), 5.90 (ddd,  $J = 16.7$ , 10.0, 6.6 Hz, 1H), 5.10 (d,  $J = 10.3$  Hz, 1H), 5.04 (d,  $J = 17.2$  Hz, 1H), 5.00 (d,  $J = 6.6$  Hz, 1H).  $^{13}\text{C}$  NMR (100 MHz,  $\text{CDCl}_3$ )  $\delta$  156.6, 147.9, 137.1, 136.5, 135.1, 130.5, 129.7, 128.7, 126.5, 126.3, 123.3, 123.2, 121.2, 116.3, 115.9, 108.7, 39.5. HRMS (EI-TOF)  $m/z$ :  $[\text{M}]^+$  calcd for  $\text{C}_{17}\text{H}_{13}^{35}\text{ClN}_2\text{O}_3$ : 328.0610, found: 328.0612;  $\text{C}_{17}\text{H}_{13}^{37}\text{ClN}_2\text{O}_3$ : 330.0580, found: 330.0585;  $[\alpha]_{\text{D}}^{25} = +30.2$  ( $c$  0.20,  $\text{CH}_2\text{Cl}_2$ ); HPLC (Chiralpak AS-H,  $n$ -hexane/ethanol = 80/20, flow rate = 1.0 mL/min,  $\lambda = 220$  nm)  $t_{\text{R}} = 7.182$  min (minor), 12.817 min (major).

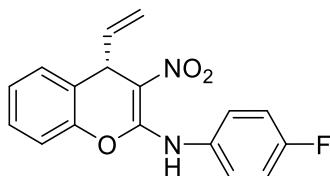

**(S)-N-(4-Fluorophenyl)-3-nitro-4-vinyl-4H-chromen-2-amine (6)**: Following the general procedure A, compound **6** was obtained as a yellow solid in 95% yield (29.7 mg), 90% ee;  $R_{\text{f}} = 0.6$  ( $\text{CH}_2\text{Cl}_2$ ); m.p: 142 – 144 °C;  $^1\text{H}$  NMR (400 MHz,  $\text{CDCl}_3$ )  $\delta$  12.17 (brs, 1H), 7.40 (dd,  $J = 9.0$ , 4.7 Hz, 2H), 7.32 – 7.24 (m, 3H), 7.17 – 7.13 (m, 2H), 7.04 (d,  $J = 8.2$  Hz, 1H), 5.91 (ddd,  $J = 16.8$ , 10.0, 6.6 Hz, 1H), 5.10 (d,  $J = 10.0$  Hz, 1H), 5.06 (d,  $J = 16.4$  Hz, 1H), 5.01 (d,  $J = 6.6$  Hz, 1H).  $^{13}\text{C}$  NMR (100 MHz,  $\text{CDCl}_3$ )  $\delta$  161.0 (d,  $^1J_{\text{C-F}} = 247.2$  Hz), 156.9, 148.1, 137.1, 131.1 (d,  $^4J_{\text{C-F}} = 3.2$  Hz), 129.8, 128.6, 126.2, 125.4 (d,  $^3J_{\text{C-F}} = 8.4$  Hz)(2C), 123.3, 116.5, 116.3 (d,  $^2J_{\text{C-F}} = 8.6$  Hz) (2C), 115.9, 108.2, 39.6.  $^{19}\text{F}$  NMR (376 MHz,  $\text{CDCl}_3$ )  $\delta$  -114.62 – -114.68 (m). HRMS (EI-TOF)  $m/z$ :  $[\text{M}]^+$  calcd for  $\text{C}_{17}\text{H}_{13}\text{FN}_2\text{O}_3$ : 312.0905, found: 312.0908;  $[\alpha]_{\text{D}}^{25} = +21.7$  ( $c$  0.20,  $\text{CH}_2\text{Cl}_2$ ); HPLC (Chiralpak AS-H,  $n$ -hexane/ethanol = 80/20, flow rate = 1.0 mL/min,  $\lambda = 220$  nm)  $t_{\text{R}} = 10.287$  min (minor), 21.105 min (major).

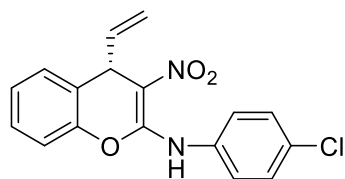

**(S)-N-(4-Chlorophenyl)-3-nitro-4-vinyl-4H-chromen-2-amine (7):** Following the general procedure A, compound **7** was obtained as a yellow solid in 89% yield (29.1 mg), 94% ee;  $R_f = 0.6$  ( $\text{CH}_2\text{Cl}_2$ ); m.p: 129 – 131 °C;  $^1\text{H NMR}$  (400 MHz,  $\text{CDCl}_3$ )  $\delta$  12.20 (brs, 1H), 7.42 – 7.35(m, 4H), 7.29 – 7.27 (m, 2H), 7.25 – 7.18 (m, 1H), 7.07 (d,  $J = 7.8$  Hz, 1H), 5.90 (ddd,  $J = 16.7, 10.0, 6.6$  Hz, 1H), 5.09 (d,  $J = 9.8$  Hz, 1H), 5.04 (d,  $J = 16.8$  Hz, 1H), 4.99 (d,  $J = 6.6$  Hz, 1H).  $^{13}\text{C NMR}$  (100 MHz,  $\text{CDCl}_3$ )  $\delta$  156.6, 147.9, 137.1, 133.8, 132.0, 129.7, 129.6(2C), 128.6, 126.2, 124.5(2C), 123.1, 116.2, 115.9, 108.4, 39.5. **HRMS** (EI-TOF)  $m/z$ :  $[\text{M}]^+$  calcd for  $\text{C}_{17}\text{H}_{13}^{35}\text{ClN}_2\text{O}_3$ : 328.0610, found: 328.0613;  $\text{C}_{17}\text{H}_{13}^{37}\text{ClN}_2\text{O}_3$ : 330.0580, found: 330.0579;  $[\alpha]_D^{25} = +29.7$  ( $c$  0.20,  $\text{CH}_2\text{Cl}_2$ ); **HPLC** (Chiralpak AS-H,  $n$ -hexane/ethanol = 80/20, flow rate = 1.0 mL/min,  $\lambda = 220$  nm)  $t_R = 9.144$  min (minor), 19.878 min (major).

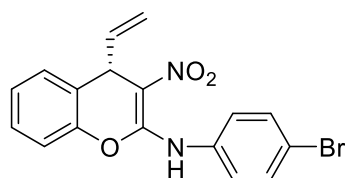

**(S)-N-(4-Bromophenyl)-3-nitro-4-vinyl-4H-chromen-2-amine (8):** Following the general procedure A, compound **8** was obtained as a yellow solid in 89% yield (33.2 mg), 98% ee;  $R_f = 0.6$  ( $\text{CH}_2\text{Cl}_2$ ); m.p: 129 – 131 °C;  $^1\text{H NMR}$  (400 MHz,  $\text{CDCl}_3$ )  $\delta$  12.19 (brs, 1H), 7.57 (d,  $J = 8.7$  Hz, 2H), 7.33 – 7.25 (m, 5H), 7.07 (d,  $J = 7.7$  Hz, 1H), 5.91 (ddd,  $J = 16.8, 10.0, 6.6$  Hz, 1H), 5.10 (d,  $J = 10.7$  Hz, 1H), 5.05 (d,  $J = 17.6$  Hz, 1H), 5.01 (d,  $J = 6.6$  Hz, 1H).  $^{13}\text{C NMR}$  (100 MHz,  $\text{CDCl}_3$ )  $\delta$  156.7, 148.1, 137.1, 134.4, 132.7(2C), 129.8, 128.7, 126.3, 124.9(2C), 123.2, 119.9, 116.3, 115.9, 108.6, 39.6. **HRMS** (EI-TOF)  $m/z$ :  $[\text{M}]^+$  calcd for  $\text{C}_{17}\text{H}_{13}^{79}\text{BrN}_2\text{O}_3$ : 372.0104, found: 372.0111;  $\text{C}_{17}\text{H}_{13}^{81}\text{BrN}_2\text{O}_3$ : 374.0084, found: 374.0090;  $[\alpha]_D^{25} = +19.8$  ( $c$  0.20,  $\text{CH}_2\text{Cl}_2$ ); **HPLC** (Chiralpak AS-H,  $n$ -hexane/ethanol = 80/20, flow rate = 1.0 mL/min,  $\lambda = 220$  nm)  $t_R = 9.542$  min (minor), 23.178 min (major).

**The preparation and X-ray analysis of the single crystal:** Compound **8** (98% ee, 10.0 mg) was dissolved in 1.0 mL of acetone in a screw-top vial and drops of hexane were added. The lid was then loosely screwed on the vial, and a single crystal was obtained by natural volatilization at room temperature. The data set was collected by a Bruker APEX-II CCD at 293(2) K equipped with Mo radiation source ( $K\alpha = 0.71073$  Å). Applied with multi-scan absorption correction, the structure solution was solved and refinement was processed by SHELXTL program package. CCDC 2342669 contains the supplementary crystallographic data, and can be obtained free of charge via [www.ccdc.cam.ac.uk/conts/retrieving.html](http://www.ccdc.cam.ac.uk/conts/retrieving.html).

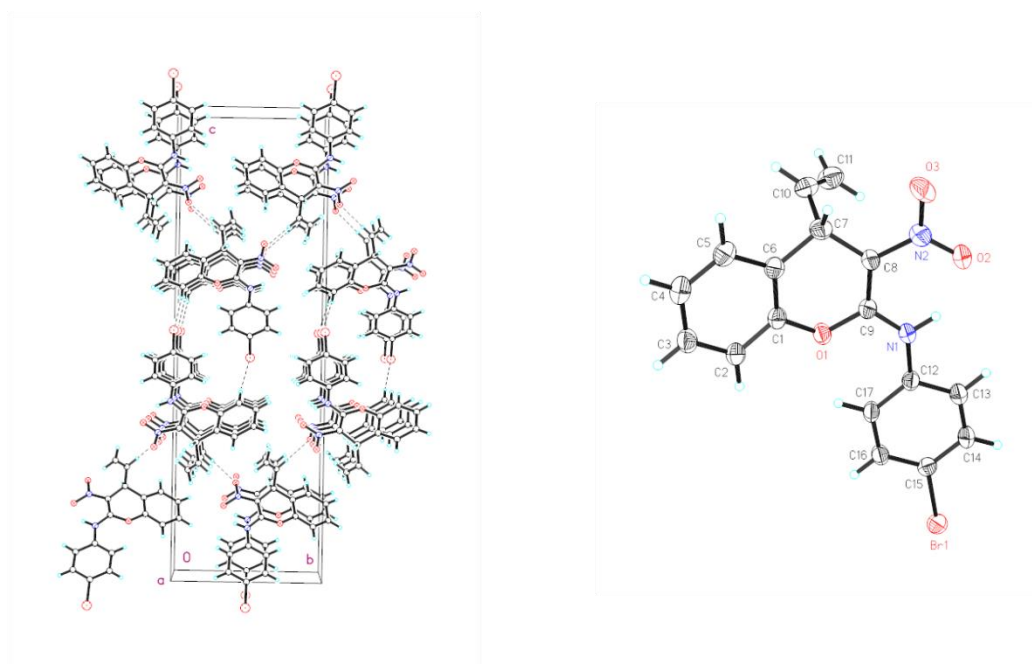

**Figure S1.** The thermal ellipsoid plot for X-ray structure of compound **8** with the ellipsoid contour at 30% probability levels

**The crystallographic data of compound 8**

|                                  |                                       |          |
|----------------------------------|---------------------------------------|----------|
| Identification code              | mo_dd22075_0m                         |          |
| Empirical formula                | $C_{17}H_{13}BrN_2O_3$                |          |
| Formula weight                   | 373.20                                |          |
| Temperature                      | 293(2) K                              |          |
| Wavelength                       | 0.71073 Å                             |          |
| Crystal system                   | Orthorhombic                          |          |
| Space group                      | P 21 21 21                            |          |
| Unit cell dimensions             | a = 4.8026(3) Å                       | a = 90 ° |
|                                  | b = 10.1124(6) Å                      | b = 90 ° |
|                                  | c = 31.8117(19) Å                     | g = 90 ° |
| Volume                           | 1544.96(16) Å <sup>3</sup>            |          |
| Z                                | 4                                     |          |
| Density (calculated)             | 1.604 Mg/m <sup>3</sup>               |          |
| Absorption coefficient           | 2.677 mm <sup>-1</sup>                |          |
| F(000)                           | 752                                   |          |
| Crystal size                     | 0.180 x 0.120 x 0.070 mm <sup>3</sup> |          |
| Theta range for data collection  | 2.783 to 25.997 °                     |          |
| Index ranges                     | -5 ≤ h ≤ 5, -9 ≤ k ≤ 12, -39 ≤ l ≤ 37 |          |
| Reflections collected            | 7304                                  |          |
| Independent reflections          | 3004 [R(int) = 0.0523]                |          |
| Completeness to theta = 25.242 ° | 99.5 %                                |          |

|                                   |                                             |
|-----------------------------------|---------------------------------------------|
| Absorption correction             | Semi-empirical from equivalents             |
| Max. and min. transmission        | 0.7456 and 0.4356                           |
| Refinement method                 | Full-matrix least-squares on F <sup>2</sup> |
| Data / restraints / parameters    | 3004 / 0 / 208                              |
| Goodness-of-fit on F <sup>2</sup> | 1.001                                       |
| Final R indices [I > 2σ(I)]       | R1 = 0.0391, wR2 = 0.0895                   |
| R indices (all data)              | R1 = 0.0533, wR2 = 0.0974                   |
| Absolute structure parameter      | 0.047(15)                                   |
| Extinction coefficient            | n/a                                         |
| Largest diff. peak and hole       | 0.460 and -0.372 e.Å <sup>-3</sup>          |

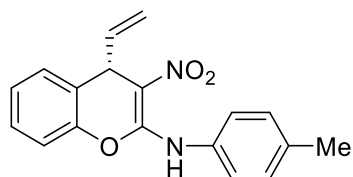

**(S)-3-Nitro-N-(p-tolyl)-4-vinyl-4H-chromen-2-amine (9):** Following the general procedure **A**, compound **9** was obtained as a yellow solid in 98% yield (30.2 mg), 85% ee;  $R_f = 0.6$  ( $\text{CH}_2\text{Cl}_2$ ); m.p: 109 – 111 °C;  $^1\text{H NMR}$  (400 MHz,  $\text{CDCl}_3$ )  $\delta$  12.25 (brs, 1H), 7.31 – 7.18(m, 7H), 7.05 (d,  $J = 9.4$  Hz, 1H), 5.91 (ddd,  $J = 16.6, 9.9, 5.9$  Hz, 1H), 5.08 (d,  $J = 9.8$  Hz, 1H), 5.03 (d,  $J = 16.4$  Hz 1H), 4.99 (d,  $J = 6.6$  Hz, 1H), 2.38 (s, 3H).  $^{13}\text{C NMR}$  (100 MHz,  $\text{CDCl}_3$ )  $\delta$  156.8, 148.1, 137.1, 136.6, 132.5, 129.9(2C), 129.6, 128.5, 125.9, 123.20, 123.1(2C), 116.2, 115.6, 107.9, 39.5, 21.1. **HRMS** (EI-TOF) m/z:  $[\text{M}]^+$  calcd for  $\text{C}_{18}\text{H}_{16}\text{N}_2\text{O}_3$ : 308.1155, found: 308.1158;  $[\alpha]_{\text{D}}^{25} = +24.5$  ( $c$  0.20,  $\text{CH}_2\text{Cl}_2$ ); **HPLC** (Chiralpak AS-H,  $n$ -hexane/ethanol = 80/20, flow rate = 1.0 mL/min,  $\lambda = 220$  nm)  $t_{\text{R}} = 9.176$  min (minor), 14.421 min (major).

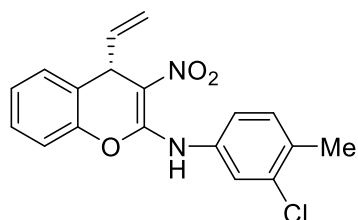

**(S)-N-(3-Chloro-4-methylphenyl)-3-nitro-4-vinyl-4H-chromen-2-amine (10):** Following the general procedure **A**, compound **10** was obtained as a yellow solid in 89% yield (30.4 mg), 93% ee;  $R_f = 0.6$  ( $\text{CH}_2\text{Cl}_2$ ); m.p: 114 – 116 °C;  $^1\text{H NMR}$  (400 MHz,  $\text{CDCl}_3$ )  $\delta$  12.17 (brs, 1H), 7.50 (d,  $J = 2.2$  Hz, 1H), 7.33 – 7.25 (m, 3H), 7.24 (d,  $J = 5.3$  Hz, 1H), 7.23 – 7.16 (m, 1H), 7.12 – 7.05 (m, 1H), 5.91 (ddd,  $J = 16.8, 10.0, 6.6$  Hz, 1H), 5.10 (d,  $J = 9.9$  Hz, 1H), 5.04 (d,  $J = 18.8$  Hz, 1H), 5.01 (d,  $J = 6.5$  Hz, 1H), 2.41 (s, 3H).  $^{13}\text{C NMR}$  (100 MHz,  $\text{CDCl}_3$ )  $\delta$  156.7, 148.0, 137.1, 134.9, 134.5, 133.9, 131.5, 129.7, 128.7, 126.2, 123.8, 123.2, 121.5, 116.3, 115.9, 108.4, 39.5, 19.8. **HRMS** (EI-TOF) m/z:  $[\text{M}]^+$  calcd for  $\text{C}_{18}\text{H}_{15}^{35}\text{ClN}_2\text{O}_3$ : 342.0766, found: 342.0769;  $\text{C}_{18}\text{H}_{15}^{37}\text{ClN}_2\text{O}_3$ : 344.0737, found: 344.0749;  $[\alpha]_{\text{D}}^{25} = +27.9$  ( $c$  0.20,  $\text{CH}_2\text{Cl}_2$ ); **HPLC** (Chiralpak AS-H,  $n$ -hexane/ethanol = 80/20, flow rate = 1.0 mL/min,  $\lambda = 220$  nm)  $t_{\text{R}} = 6.863$  min (minor), 11.101 min (major).

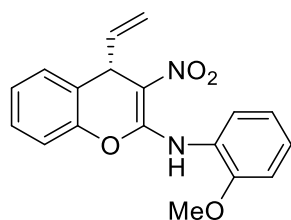

**(S)-N-(2-Methoxyphenyl)-3-nitro-4-vinyl-4H-chromen-2-amine (11):** Following the general procedure **A**, compound **11** was obtained as a yellow solid in 95% yield (30.8 mg), 50% ee;  $R_f = 0.6$  ( $\text{CH}_2\text{Cl}_2$ ); m.p: 170 – 172 °C;  $^1\text{H NMR}$  (400 MHz,  $\text{CDCl}_3$ )  $\delta$  12.61 (brs, 1H), 7.82 (d,  $J = 8.0$  Hz, 1H), 7.33 – 7.24 (m, 2H), 7.26 – 7.17 (m, 2H), 7.17 – 7.10 (m, 1H), 7.08 – 6.96 (m, 2H), 5.93 (ddd,  $J = 16.7, 10.8, 6.5$  Hz, 1H), 5.12 – 4.99 (m, 3H), 3.94 (s, 3H).  $^{13}\text{C NMR}$  (100

MHz, CDCl<sub>3</sub>)  $\delta$  156.7, 150.6, 148.2, 137.4, 129.7, 128.5, 126.6, 126.0, 125.3, 123.5, 122.4, 120.9, 116.3, 115.6, 111.2, 108.3, 56.2, 39.7. **HRMS** (EI-TOF)  $m/z$ : [M]<sup>+</sup> calcd for C<sub>18</sub>H<sub>16</sub>N<sub>2</sub>O<sub>4</sub>: 324.1105, found: 324.1112; [ $\alpha$ ]<sub>D</sub><sup>25</sup> = +16.3 (*c* 0.20, CH<sub>2</sub>Cl<sub>2</sub>); **HPLC** (Chiralpak AS-H, *n*-hexane/ethanol = 80/20, flow rate = 1.0 mL/min,  $\lambda$  = 220 nm)  $t_R$  = 8.152 min (minor), 16.787 min (major).

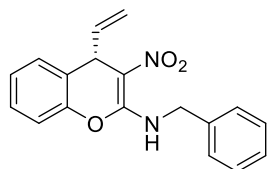

**(S)-N-Benzyl-3-nitro-4-vinyl-4H-chromen-2-amine (12)**: Following the general procedure **A**, compound **12** was obtained as a white solid in 55% yield (16.9 mg), 92% ee;  $R_f$  = 0.6 (petroleum ether/ethyl acetate = 4/1); m.p: 148 – 150 °C; **<sup>1</sup>H NMR** (400 MHz, CDCl<sub>3</sub>)  $\delta$  10.75 (brs, 1H), 7.43 – 7.30 (m, 5H), 7.30 – 7.22 (m, 2H), 7.24 – 7.14 (m, 1H), 7.08 – 7.01 (m, 1H), 5.88 (ddd,  $J$  = 16.7, 10.0, 6.5 Hz, 1H), 5.06 (d,  $J$  = 10.1 Hz, 1H), 5.02 (d,  $J$  = 16.9 Hz, 1H), 4.95 (d,  $J$  = 6.5 Hz, 1H), 4.85 – 4.69 (m, 2H). **<sup>13</sup>C NMR** (100 MHz, CDCl<sub>3</sub>)  $\delta$  159.2, 148.2, 137.4, 136.4, 129.8, 129.2(2C), 128.5, 128.3, 127.6(2C), 125.9, 123.5, 116.1, 115.5, 107.4, 45.6, 39.6. **HRMS** (EI-TOF)  $m/z$ : [M]<sup>+</sup> calcd for C<sub>18</sub>H<sub>16</sub>N<sub>2</sub>O<sub>3</sub>: 308.1155, found: 308.1165; [ $\alpha$ ]<sub>D</sub><sup>25</sup> = +3.2 (*c* 0.20, CH<sub>2</sub>Cl<sub>2</sub>); **HPLC** (Chiralpak AS-H, *n*-hexane/ethanol = 80/20, flow rate = 1.0 mL/min,  $\lambda$  = 220 nm)  $t_R$  = 13.326 min (minor), 39.044 min (major).

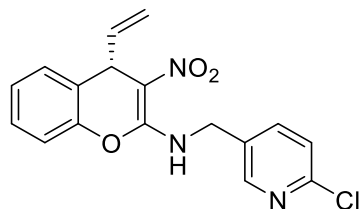

**(S)-N-((6-Chloropyridin-3-yl)methyl)-3-nitro-4-vinyl-4H-chromen-2-amine (13)**: Following the general procedure **A**, compound **13** was obtained as a yellow solid in 65% yield (22.4 mg), 96% ee;  $R_f$  = 0.5 (petroleum ether/ethyl acetate = 4/1); m.p: 109 – 111 °C; **<sup>1</sup>H NMR** (400 MHz, CDCl<sub>3</sub>)  $\delta$  10.72 (brs, 1H), 8.46 (d,  $J$  = 2.5 Hz, 1H), 7.71 (dd,  $J$  = 8.3, 2.5 Hz, 1H), 7.36 (d,  $J$  = 8.2 Hz, 1H), 7.27 – 7.16 (m, 3H), 7.03 (dd,  $J$  = 7.8, 1.9 Hz, 1H), 5.85 (ddd,  $J$  = 16.7, 10.0, 6.6 Hz, 1H), 5.06 (d,  $J$  = 10.0 Hz, 1H), 5.01 (d,  $J$  = 17.0 Hz, 1H), 4.92 (d,  $J$  = 6.6 Hz, 1H), 4.85 – 4.70 (m, 2H). **<sup>13</sup>C NMR** (100 MHz, CDCl<sub>3</sub>)  $\delta$  159.1, 151.4, 149.1, 147.9, 138.2, 137.2, 131.5, 129.8, 128.7, 126.1, 124.8, 123.2, 115.9, 115.7, 107.8, 42.3, 39.5. **HRMS** (EI-TOF)  $m/z$ : [M]<sup>+</sup> calcd for C<sub>17</sub>H<sub>14</sub><sup>35</sup>ClN<sub>3</sub>O<sub>3</sub>: 343.0719, found: 343.0727; C<sub>17</sub>H<sub>14</sub><sup>37</sup>ClN<sub>3</sub>O<sub>3</sub>: 345.0689, found: 345.0695; [ $\alpha$ ]<sub>D</sub><sup>25</sup> = +22.4 (*c* 0.20, CH<sub>2</sub>Cl<sub>2</sub>); **HPLC** (Chiralpak AS-H, *n*-hexane/ethanol = 80/20, flow rate = 1.0 mL/min,  $\lambda$  = 220 nm)  $t_R$  = 18.847 min (minor), 48.310 min (major).

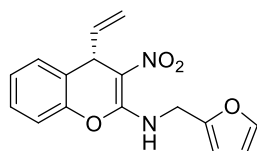

**(S)-N-(Furan-2-ylmethyl)-3-nitro-4-vinyl-4H-chromen-2-amine (14):** Following the general procedure A, compound **14** was obtained as a yellow solid in 98% yield (29.2 mg), 91% ee;  $R_f = 0.4$  (petroleum ether/ethyl acetate = 4/1); m.p: 165 – 167 °C;  $^1\text{H NMR}$  (400 MHz,  $\text{CDCl}_3$ )  $\delta$  10.58 (brs, 1H), 7.40 (dd,  $J = 1.8, 0.9$  Hz, 1H), 7.32 – 7.26 (m, 2H), 7.22 (d,  $J = 6.7$  Hz, 1H), 7.13 (d,  $J = 6.7$  Hz, 1H), 6.37 – 6.34 (m, 2H), 5.87 (ddd,  $J = 16.7, 10.0, 6.5$  Hz, 1H), 5.06 (d,  $J = 11.8$  Hz, 1H), 5.00 (d,  $J = 16.8$ , 1H), 4.94 (d,  $J = 6.6$  Hz, 1H), 4.82 – 4.69 (m, 2H).  $^{13}\text{C NMR}$  (100 MHz,  $\text{CDCl}_3$ )  $\delta$  158.9, 149.3, 148.2, 143.1, 137.4, 129.8, 128.5, 125.9, 123.5, 116.2, 115.5, 110.8, 108.6, 107.6, 39.6, 38.4. **HRMS** (EI-TOF)  $m/z$ :  $[\text{M}]^+$  calcd for  $\text{C}_{16}\text{H}_{14}\text{N}_2\text{O}_4$ : 298.0948, found: 298.0951;  $[\alpha]_{\text{D}}^{25} = +6.3$  ( $c$  0.20,  $\text{CH}_2\text{Cl}_2$ ); **HPLC** (Chiralpak AS-H,  $n$ -hexane/ethanol = 80/20, flow rate = 1.0 mL/min,  $\lambda = 220$  nm)  $t_{\text{R}} = 13.716$  min (minor), 42.619 min (major).

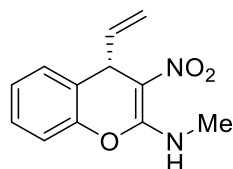

**(S)-N-Methyl-3-nitro-4-vinyl-4H-chromen-2-amine (15):** Following the general procedure A, compound **15** was obtained as a white solid in 96% yield (22.3 mg), 82% ee;  $R_f = 0.3$  (petroleum ether/ethyl acetate = 4/1); m.p: 120 – 122 °C;  $^1\text{H NMR}$  (400 MHz,  $\text{CDCl}_3$ )  $\delta$  10.48 (brs, 1H), 7.32 – 7.24 (m, 2H), 7.22 – 7.18 (m 1H), 7.15 – 7.09 (m, 1H), 5.88 (ddd,  $J = 16.7, 9.9, 6.4$  Hz, 1H), 5.05 (d,  $J = 10.0$  Hz, 1H), 5.00 (d,  $J = 16.9$  Hz, 1H), 4.94 (d,  $J = 6.4$  Hz, 1H), 3.22 (d,  $J = 5.2$  Hz, 3H).  $^{13}\text{C NMR}$  (100 MHz,  $\text{CDCl}_3$ )  $\delta$  159.9, 148.2, 137.4, 129.8, 128.5, 125.9, 123.4, 116.2, 115.3, 107.2, 39.6, 27.9. **HRMS** (EI-TOF)  $m/z$ :  $[\text{M}]^+$  calcd for  $\text{C}_{12}\text{H}_{12}\text{N}_2\text{O}_3$ : 232.0842, found: 232.0845;  $[\alpha]_{\text{D}}^{25} = +19.3$  ( $c$  0.20,  $\text{CH}_2\text{Cl}_2$ ); **HPLC** (Chiralpak IC,  $n$ -hexane/ethanol = 80/20, flow rate = 1.0 mL/min,  $\lambda = 220$  nm)  $t_{\text{R}} = 28.767$  min (major), 36.700 min (minor).

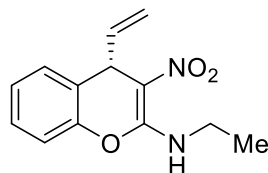

**(S)-N-Ethyl-3-nitro-4-vinyl-4H-chromen-2-amine (16):** Following the general procedure A, compound **16** was obtained as a yellow solid in 98% yield (24.1 mg), 65% ee;  $R_f = 0.3$  (petroleum ether/ethyl acetate = 4/1); m.p: 103 – 105 °C;  $^1\text{H NMR}$  (400 MHz,  $\text{CDCl}_3$ )  $\delta$  10.50 (brs, 1H), 7.30 – 7.25 (m, 2H), 7.21 (d,  $J = 7.1$  Hz, 1H), 7.10 (d,  $J = 6.0$  Hz, 1H), 5.88 (ddd,  $J = 16.9, 9.9, 6.1$  Hz, 1H), 5.05 (d,  $J = 9.6$  Hz, 1H), 4.99 (d,  $J = 16.6$  Hz, 1H), 4.95 (d,  $J = 7.0$  Hz, 1H), 3.71 – 3.59 (m, 2H), 1.38 (t,  $J = 7.0$  Hz, 3H).  $^{13}\text{C NMR}$  (100 MHz,  $\text{CDCl}_3$ )  $\delta$  159.3, 148.3, 137.4, 129.8, 128.5, 125.8, 123.5, 116.1, 115.3, 106.9, 39.6, 36.7, 15.2. **HRMS** (EI-TOF)



m/z:  $[M]^+$  calcd for  $C_{13}H_{14}N_2O_3$ : 246.0999, found: 246.1001;  $[\alpha]_D^{25} = +16.9$  ( $c$  0.20,  $CH_2Cl_2$ ); **HPLC** (Chiralpak AS-H,  $n$ -hexane/ethanol = 80/20, flow rate = 1.0 mL/min,  $\lambda = 220$  nm)  $t_R = 8.319$  min (minor), 36.278 min (major).

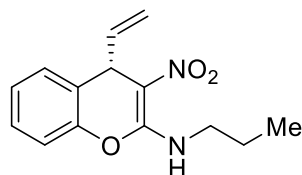

**(S)-3-Nitro-N-propyl-4-vinyl-4H-chromen-2-amine (17)**: Following the general procedure **A**, compound **17** was obtained as a yellow solid in 95% yield (24.6 mg), 69% ee;  $R_f = 0.6$  (petroleum ether/ethyl acetate = 4/1); m.p: 82 – 84 °C;  **$^1H$  NMR** (400 MHz,  $CDCl_3$ )  $\delta$  10.59 (brs, 1H), 7.26 (d,  $J = 6.8$  Hz, 2H), 7.21 (d,  $J = 7.4$  Hz, 1H), 7.11 (d,  $J = 8.1$  Hz, 1H), 5.92 – 5.84 (m, 1H), 5.05 (d,  $J = 10.0$  Hz, 1H), 5.00 (d,  $J = 17.0$  Hz, 1H), 4.95 (d,  $J = 6.3$  Hz, 1H), 3.58 (t,  $J = 6.3$  Hz, 2H), 1.80 – 1.71 (m, 2H), 1.05 (t,  $J = 7.5$  Hz, 3H).  **$^{13}C$  NMR** (100 MHz,  $CDCl_3$ )  $\delta$  159.4, 148.2, 137.3, 129.7, 128.4, 125.8, 123.4, 116.1, 115.3, 106.9, 43.3, 39.6, 23.1, 11.5. **HRMS** (EI-TOF) m/z:  $[M]^+$  calcd for  $C_{14}H_{16}N_2O_3$ : 260.1155, found: 260.1159;  $[\alpha]_D^{25} = +5.4$  ( $c$  0.20,  $CH_2Cl_2$ ); **HPLC** (Chiralpak AS-H,  $n$ -hexane/ethanol = 80/20, flow rate = 1.0 mL/min,  $\lambda = 220$  nm)  $t_R = 7.287$  min (minor), 18.508 min (major).

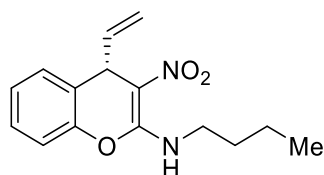

**(S)-N-Butyl-3-nitro-4-vinyl-4H-chromen-2-amine (18)**: Following the general procedure **A**, compound **18** was obtained as a yellow solid in 90% yield (24.6 mg), 75% ee;  $R_f = 0.3$  (petroleum ether/ethyl acetate = 4/1); m.p: 77 – 79 °C;  **$^1H$  NMR** (400 MHz,  $CDCl_3$ )  $\delta$  10.57 (brs, 1H), 7.30 – 7.26 (m, 2H), 7.22 – 7.18 (m, 1H), 7.10 (dd,  $J = 8.2, 1.3$  Hz, 1H), 5.88 (ddd,  $J = 16.7, 10.0, 6.4$  Hz, 1H), 5.05 (d,  $J = 10.0$  Hz, 1H), 5.00 (d,  $J = 16.9$  Hz, 1H), 4.95 (d,  $J = 6.6$  Hz, 1H), 3.65 – 3.57 (m, 2H), 1.77 – 1.65 (m, 2H), 1.54 – 1.40 (m, 2H), 0.99 (t,  $J = 7.4$  Hz, 3H).  **$^{13}C$  NMR** (100 MHz,  $CDCl_3$ )  $\delta$  159.4, 148.3, 137.4, 129.8, 128.5, 125.8, 123.5, 116.1, 115.3, 107.0, 41.4, 39.6, 31.8, 20.1, 13.8. **HRMS** (EI-TOF) m/z:  $[M]^+$  calcd for  $C_{15}H_{18}N_2O_3$ : 274.1312, found: 274.1315;  $[\alpha]_D^{25} = +13.5$  ( $c$  0.20,  $CH_2Cl_2$ ); **HPLC** (Chiralpak AS-H,  $n$ -hexane/ethanol = 80/20, flow rate = 1.0 mL/min,  $\lambda = 220$  nm)  $t_R = 6.707$  min (minor), 13.253 min (major).

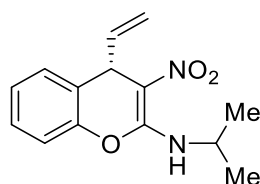

**(S)-N-Isopropyl-3-nitro-4-vinyl-4H-chromen-2-amine (19)**: Following the general procedure **A**, compound **19** was obtained as a yellow solid in 88% yield (22.9 mg), 72% ee;  $R_f$

= 0.3 (petroleum ether/ethyl acetate = 4/1); m.p: 134 – 136 °C; <sup>1</sup>H NMR (400 MHz, CDCl<sub>3</sub>) δ 10.46 (brs, 1H), 7.31 – 7.26 (m, 2H), 7.20 (d, *J* = 7.9 Hz, 1H), 7.11 (d, *J* = 8.6 Hz, 1H), 5.88 (ddd, *J* = 16.7, 10.0, 6.4 Hz, 1H), 5.05 (d, *J* = 10.0 Hz, 1H), 4.99 (d, *J* = 17.0 Hz, 2H), 4.95 (d, *J* = 6.3 Hz, 1H), 4.38 – 4.22 (m, 1H), 1.41 (d, *J* = 6.6 Hz, 3H), 1.38 (d, *J* = 6.5 Hz, 3H). <sup>13</sup>C NMR (100 MHz, CDCl<sub>3</sub>) δ 158.6, 148.3, 137.4, 129.7, 128.4, 125.8, 123.5, 116.1, 115.3, 106.8, 44.5, 39.6, 23.4, 23.2. HRMS (EI-TOF) *m/z*: [M]<sup>+</sup> calcd for C<sub>14</sub>H<sub>16</sub>N<sub>2</sub>O<sub>3</sub>: 260.1155, found: 260.1158; [α]<sub>D</sub><sup>25</sup> = +14.1 (*c* 0.20, CH<sub>2</sub>Cl<sub>2</sub>); HPLC (Chiralpak AS-H, *n*-hexane/ethanol = 80/20, flow rate = 1.0 mL/min, λ = 220 nm) t<sub>R</sub> = 5.879 min (minor), 20.802 min (major).

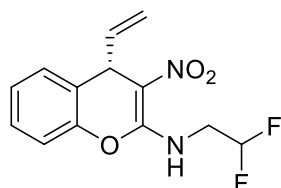

**(*R*)-*N*-(2,2-Difluoroethyl)-4-vinyl-4*H*-chromen-2-amine (20):** Following the general procedure A, compound **20** was obtained as a white solid in 98% yield (27.6 mg), 83% ee; R<sub>f</sub> = 0.4 (petroleum ether/ethyl acetate = 4/1); m.p: 134 – 136 °C; <sup>1</sup>H NMR (400 MHz, CDCl<sub>3</sub>) δ 10.40 (brs, 1H), 7.34 – 7.18 (m, 3H), 7.11 (dd, *J* = 8.1, 1.3 Hz, 1H), 6.02 (tt, *J*<sub>H-F</sub> = 55.2 Hz, *J* = 3.8 Hz, 1H), 5.85 (ddd, *J* = 16.8, 10.0, 6.8 Hz, 1H), 5.07 (d, *J* = 10.0 Hz, 1H), 5.03 (d, *J* = 17.0 Hz, 1H), 4.92 (d, *J* = 6.6 Hz, 1H), 3.98 (td, *J*<sub>H-F</sub> = 14.5 Hz, *J* = 6.6 Hz, 2H). <sup>13</sup>C NMR (100 MHz, CDCl<sub>3</sub>) δ 159.1, 147.9, 137.2, 129.8, 128.6, 126.2, 123.3, 116.1, 115.7, 113.2(t, <sup>1</sup>*J*<sub>C-F</sub> = 242.0 Hz), 108.2, 43.4(t, <sup>2</sup>*J*<sub>C-F</sub> = 26.8 Hz), 39.5. <sup>19</sup>F NMR (376 MHz, CDCl<sub>3</sub>) δ -122.59 (dtd, *J* = 55.4, 14.4, 7.0 Hz). HRMS (EI-TOF) *m/z*: [M]<sup>+</sup> calcd for C<sub>13</sub>H<sub>12</sub>F<sub>2</sub>N<sub>2</sub>O<sub>3</sub>: 282.0811, found: 282.0811; [α]<sub>D</sub><sup>25</sup> = +12.9 (*c* 0.20, CH<sub>2</sub>Cl<sub>2</sub>); HPLC (Chiralpak AS-H, *n*-hexane/ethanol = 80/20, flow rate = 1.0 mL/min, λ = 220 nm) t<sub>R</sub> = 10.387 min (minor), 49.030 min (major).

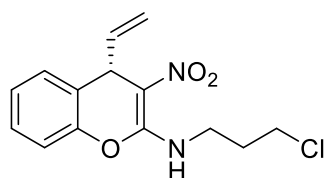

**(*S*)-*N*-(3-Chloropropyl)-3-nitro-4-vinyl-4*H*-chromen-2-amine (21):** Following the general procedure A, compound **21** was obtained as a yellow solid in 62% yield (18.3 mg), 77% ee; R<sub>f</sub> = 0.3 (petroleum ether/ethyl acetate = 4/1); m.p: 94 – 96 °C; <sup>1</sup>H NMR (400 MHz, CDCl<sub>3</sub>) δ 10.54 (brs, 1H), 7.33 – 7.26 (m, 2H), 7.24 – 7.19 (m, 1H), 7.14 (dd, *J* = 8.1, 1.3 Hz, 1H), 5.87 (ddd, *J* = 16.8, 10.0, 6.5 Hz, 1H), 5.06 (d, *J* = 10.0 Hz, 1H), 5.01 (d, *J* = 17.0 Hz, 1H), 4.94 (d, *J* = 6.5 Hz, 1H), 3.88 – 3.75 (m, 2H), 3.67 (t, *J* = 6.0 Hz, 2H), 2.23 – 2.16 (m, 2H). <sup>13</sup>C NMR (100 MHz, CDCl<sub>3</sub>) δ 159.4, 148.1, 137.3, 129.7, 128.5, 125.9, 123.3, 116.2, 115.5, 107.3, 41.8, 39.6, 38.7, 32.5. HRMS (EI-TOF) *m/z*: [M]<sup>+</sup> calcd for C<sub>14</sub>H<sub>15</sub><sup>35</sup>ClN<sub>2</sub>O<sub>3</sub>: 294.0766, found: 294.0766; C<sub>14</sub>H<sub>15</sub><sup>37</sup>ClN<sub>2</sub>O<sub>3</sub>: 296.0737, found: 296.0748; [α]<sub>D</sub><sup>25</sup> = +18.5 (*c* 0.20, CH<sub>2</sub>Cl<sub>2</sub>); HPLC (Chiralpak AS-H, *n*-hexane/ethanol = 80/20, flow rate = 1.0 mL/min, λ = 220 nm) t<sub>R</sub> = 12.271 min (minor), 28.732 min (major).

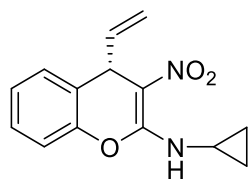

**(S)-N-Cyclopropyl-3-nitro-4-vinyl-4H-chromen-2-amine (22):** Following the general procedure A, compound **22** was obtained as a yellow solid in 93% yield (24.1 mg), 60% ee;  $R_f = 0.6$  (petroleum ether/ethyl acetate = 4/1); m.p: 128 – 130 °C;  $^1\text{H NMR}$  (400 MHz,  $\text{CDCl}_3$ )  $\delta$  10.35 (brs, 1H), 7.35 – 7.23 (m, 2H), 7.21 (d,  $J = 7.4$  Hz, 1H), 7.15 (d,  $J = 8.1$  Hz, 1H), 5.91 – 5.83 (m, 1H), 5.05 (d,  $J = 10.0$  Hz, 1H), 5.00 (d,  $J = 17.0$  Hz, 1H), 4.93 (d,  $J = 6.4$  Hz, 1H), 3.03 (tt,  $J = 7.8, 3.9$  Hz, 1H), 0.95 – 1.00 (m, 2H), 0.87 – 0.74 (m, 2H).  $^{13}\text{C NMR}$  (100 MHz,  $\text{CDCl}_3$ )  $\delta$  160.88, 148.28, 137.34, 129.72, 128.48, 125.83, 123.33, 116.33, 115.42, 107.37, 39.55, 23.94, 7.41(2C). **HRMS** (EI-TOF)  $m/z$ :  $[\text{M}]^+$  calcd for  $\text{C}_{14}\text{H}_{14}\text{N}_2\text{O}_3$ : 258.0999, found: 258.1007;  $[\alpha]_{\text{D}}^{25} = +2.4$  ( $c$  0.20,  $\text{CH}_2\text{Cl}_2$ ); **HPLC** (Chiralpak AS-H,  $n$ -hexane/ethanol = 80/20, flow rate = 1.0 mL/min,  $\lambda = 220$  nm)  $t_{\text{R}} = 7.778$  min (minor), 27.845 min (major).

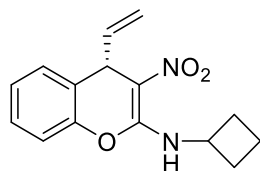

**(S)-N-Cyclobutyl-3-nitro-4-vinyl-4H-chromen-2-amine (23):** Following the general procedure A, compound **23** was obtained as a yellow solid in 93% yield (25.3 mg), 70% ee;  $R_f = 0.3$  (petroleum ether/ethyl acetate = 4/1); m.p: 131 – 133 °C;  $^1\text{H NMR}$  (400 MHz,  $\text{CDCl}_3$ )  $\delta$  10.56 (brs, 1H), 7.30 – 7.24 (m, 2H), 7.21 – 7.17 (m, 1H), 7.08 (dd,  $J = 8.0, 1.2$  Hz, 1H), 5.87 (ddd,  $J = 16.7, 10.0, 6.4$  Hz, 1H), 5.05 (d,  $J = 9.9$  Hz, 1H), 4.99 (d,  $J = 16.9$  Hz, 1H), 4.93 (d,  $J = 6.4$  Hz, 1H), 4.56 – 4.46 (m, 1H), 2.52 – 2.45 (m, 2H), 2.27 – 2.09 (m, 2H), 1.97 – 1.79 (m, 2H).  $^{13}\text{C NMR}$  (100 MHz,  $\text{CDCl}_3$ )  $\delta$  158.2, 148.2, 137.4, 129.7, 128.4, 125.8, 123.4, 116.1, 115.3, 106.9, 46.6, 39.5, 31.5, 31.3, 15.5. **HRMS** (EI-TOF)  $m/z$ :  $[\text{M}]^+$  calcd for  $\text{C}_{15}\text{H}_{16}\text{N}_2\text{O}_3$ : 272.1155, found: 272.1157;  $[\alpha]_{\text{D}}^{25} = +10.0$  ( $c$  0.20,  $\text{CH}_2\text{Cl}_2$ ); **HPLC** (Chiralpak AS-H,  $n$ -hexane/ethanol = 80/20, flow rate = 1.0 mL/min,  $\lambda = 220$  nm)  $t_{\text{R}} = 7.547$  min (minor), 19.735 min (major).

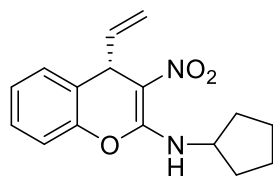

**(S)-N-Cyclopentyl-3-nitro-4-vinyl-4H-chromen-2-amine (24):** Following the general procedure A, compound **24** was obtained as a yellow solid in 91% yield (26.0 mg), 69% ee;  $R_f = 0.3$  (petroleum ether/ethyl acetate = 4/1); m.p: 93 – 95 °C;  $^1\text{H NMR}$  (400 MHz,  $\text{CDCl}_3$ )  $\delta$  10.59 (brs, 1H), 7.30 – 7.25 (m, 2H), 7.22 – 7.17 (m, 1H), 7.11 (dd,  $J = 8.1, 1.3$  Hz, 1H), 5.88 (ddd,  $J = 16.7, 10.0, 6.4$  Hz, 1H), 5.05 (d,  $J = 9.9$  Hz, 1H), 4.99 (d,  $J = 16.9$  Hz, 1H), 4.94 (d,  $J = 6.3$  Hz, 1H), 4.43 – 4.35 (m, 1H), 2.22 – 2.07 (m, 2H), 1.90 – 1.79 (m, 2H), 1.78 – 1.67 (m,

4H).  $^{13}\text{C}$  NMR (100 MHz,  $\text{CDCl}_3$ )  $\delta$  158.9, 148.3, 137.4, 129.8, 128.4, 125.8, 123.5, 116.1, 115.3, 106.9, 53.6, 39.6, 34.0, 33.8, 23.9. **HRMS** (EI-TOF)  $m/z$ :  $[\text{M}]^+$  calcd for  $\text{C}_{16}\text{H}_{18}\text{N}_2\text{O}_3$ : 286.1312, found: 286.1314;  $[\alpha]_{\text{D}}^{25} = +10.9$  ( $c$  0.20,  $\text{CH}_2\text{Cl}_2$ ); **HPLC** (Chiralpak AS-H,  $n$ -hexane/ethanol = 80/20, flow rate = 1.0 mL/min,  $\lambda = 220$  nm)  $t_{\text{R}} = 6.577$  min (minor), 16.542 min (major).

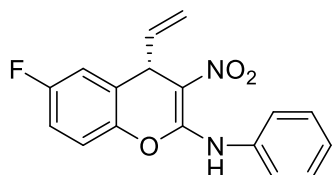

**(S)-6-Fluoro-3-nitro-N-phenyl-4-vinyl-4H-chromen-2-amine (25)**: Following the general procedure A, compound **25** was obtained as a yellow solid in 98% yield (30.6 mg), 87% ee;  $R_{\text{f}} = 0.6$  ( $\text{CH}_2\text{Cl}_2$ ); m.p: 138 – 140 °C;  $^1\text{H}$  NMR (400 MHz,  $\text{CDCl}_3$ )  $\delta$  12.18 (brs, 1H), 7.47 – 7.40 (m, 4H), 7.32 – 7.29 (m, 1H), 7.05 (dd,  $J = 8.7, 4.5$  Hz, 1H), 6.99 (d,  $J = 8.1$  Hz, 2H), 5.90 (ddd,  $J = 16.6, 9.9, 6.6$  Hz, 1H), 5.14 (d,  $J = 9.2$  Hz, 1H), 5.10 (d,  $J = 15.6$  Hz, 1H), 4.99 (d,  $J = 6.7$  Hz, 1H).  $^{13}\text{C}$  NMR (100 MHz,  $\text{CDCl}_3$ )  $\delta$  160.0 (d,  $^1J_{\text{C-F}} = 245.6$  Hz), 156.7, 144.2, 136.6, 135.1, 129.6 (2C), 126.8, 125.3 (d,  $^3J_{\text{C-F}} = 7.9$  Hz), 123.4 (2C), 117.8 (d,  $^3J_{\text{C-F}} = 8.4$  Hz), 116.4, 115.9 (d,  $^2J_{\text{C-F}} = 23.9$  Hz), 115.7 (d,  $^2J_{\text{C-F}} = 24.1$  Hz), 107.6, 39.9.  $^{19}\text{F}$  NMR (376 MHz,  $\text{CDCl}_3$ )  $\delta$  -115.76 – -115.82 (m). **HRMS** (EI-TOF)  $m/z$ :  $[\text{M}]^+$  calcd for  $\text{C}_{17}\text{H}_{13}\text{FN}_2\text{O}_3$ : 312.0905, found: 312.0909;  $[\alpha]_{\text{D}}^{25} = +23.8$  ( $c$  0.20,  $\text{CH}_2\text{Cl}_2$ ); **HPLC** (Chiralpak AS-H,  $n$ -hexane/ethanol = 80/20, flow rate = 1.0 mL/min,  $\lambda = 220$  nm)  $t_{\text{R}} = 8.241$  min (minor), 13.449 min (major).

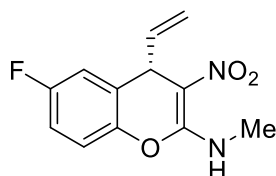

**(S)-6-Fluoro-N-methyl-3-nitro-4-vinyl-4H-chromen-2-amine (26)**: Following the general procedure A, compound **26** was obtained as a yellow solid in 98% yield (24.5mg), 88% ee;  $R_{\text{f}} = 0.4$  (petroleum ether/ethyl acetate = 4/1); m.p: 139 – 141 °C;  $^1\text{H}$  NMR (400 MHz,  $\text{CDCl}_3$ )  $\delta$  10.42 (brs, 1H), 7.11 (dd,  $J = 8.7, 4.5$  Hz, 1H), 7.03 – 6.93 (m, 2H), 5.85 (ddd,  $J = 16.7, 10.0, 6.6$  Hz, 1H), 5.09 (d,  $J = 10.0$  Hz, 1H), 5.04 (d,  $J = 16.9$  Hz, 1H), 4.91 (d,  $J = 6.5$  Hz, 1H), 3.22 (d,  $J = 5.2$  Hz, 3H).  $^{13}\text{C}$  NMR (100 MHz,  $\text{CDCl}_3$ )  $\delta$  160.4 (d,  $^1J_{\text{C-F}} = 140.8$  Hz), 158.6, 144.3, 136.8, 125.3 (d,  $^3J_{\text{C-F}} = 8.0$  Hz), 117.7 (d,  $^3J_{\text{C-F}} = 8.7$  Hz), 115.9 (d,  $^2J_{\text{C-F}} = 12.7$  Hz), 115.7 (d,  $^2J_{\text{C-F}} = 15.7$  Hz), 115.4, 106.6, 39.9, 28.0.  $^{19}\text{F}$  NMR (376 MHz,  $\text{CDCl}_3$ )  $\delta$  -116.21 – -116.24(m). **HRMS** (EI-TOF)  $m/z$ :  $[\text{M}]^+$  calcd for  $\text{C}_{12}\text{H}_{11}\text{FN}_2\text{O}_3$ : 250.0748, found: 250.0752;  $[\alpha]_{\text{D}}^{25} = +16.9$  ( $c$  0.20,  $\text{CH}_2\text{Cl}_2$ ); **HPLC** (Chiralpak AS-H,  $n$ -hexane/ethanol = 80/20, flow rate = 1.0 mL/min,  $\lambda = 220$  nm)  $t_{\text{R}} = 11.028$  min (minor), 55.533 min (major).

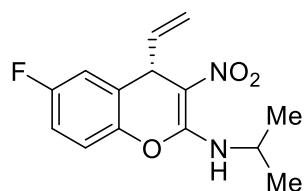

**(S)-6-Fluoro-N-isopropyl-3-nitro-4-vinyl-4H-chromen-2-amine (27):** Following the general procedure A, compound **27** was obtained as a yellow solid in 90% yield (25.0mg), 79% ee;  $R_f = 0.4$  (petroleum ether/ethyl acetate = 4/1); m.p: 140 – 142 °C;  $^1\text{H NMR}$  (400 MHz,  $\text{CDCl}_3$ )  $\delta$  10.39 (brs, 1H), 7.09 (dd,  $J = 8.6, 4.5$  Hz, 1H), 7.01 – 6.95 (m, 2H), 5.86 (ddd,  $J = 16.8, 10.0, 6.5$  Hz, 1H), 5.09 (d,  $J = 10.0$  Hz, 1H), 5.03 (d,  $J = 16.9$  Hz, 1H), 4.92 (d,  $J = 6.6$  Hz, 1H), 4.32 – 4.24 (m, 1H), 1.40 (d,  $J = 6.5$  Hz, 3H), 1.37 (d,  $J = 6.5$  Hz, 3H).  $^{13}\text{C NMR}$  (100 MHz,  $\text{CDCl}_3$ )  $\delta$  159.8 (d,  $^1J_{\text{C-F}} = 245.2$  Hz), 158.4, 144.3 (d,  $^4J_{\text{C-F}} = 2.6$  Hz), 136.8, 125.4 (d,  $^3J_{\text{C-F}} = 8.0$  Hz), 117.5 (d,  $^3J_{\text{C-F}} = 8.6$  Hz), 115.9 (d,  $^2J_{\text{C-F}} = 17.5$  Hz), 115.8, 115.5 (d,  $^2J_{\text{C-F}} = 24.1$  Hz), 106.2, 44.5, 39.8, 23.4, 23.2.  $^{19}\text{F NMR}$  (376 MHz,  $\text{CDCl}_3$ )  $\delta$  -116.29 – -116.40 (m). **HRMS** (EI-TOF)  $m/z$ :  $[\text{M}]^+$  calcd for  $\text{C}_{14}\text{H}_{15}\text{FN}_2\text{O}_3$ : 278.1061, found: 278.1064;  $[\alpha]_{\text{D}}^{25} = +10.6$  ( $c$  0.20,  $\text{CH}_2\text{Cl}_2$ ); **HPLC** (Chiralpak AS-H,  $n$ -hexane/ethanol = 80/20, flow rate = 1.0 mL/min,  $\lambda = 220$  nm)  $t_{\text{R}} = 5.905$  min (minor), 17.752 min (major).

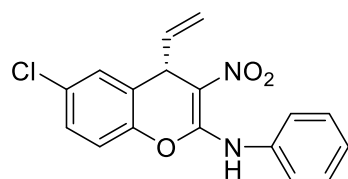

**(S)-6-Chloro-3-nitro-N-phenyl-4-vinyl-4H-chromen-2-amine (28):** Following the general procedure A, compound **28** was obtained as a yellow solid in 98% yield (32.1mg), 96% ee;  $R_f = 0.5$  ( $\text{CH}_2\text{Cl}_2$ ); m.p: 146 – 148 °C;  $^1\text{H NMR}$  (400 MHz,  $\text{CDCl}_3$ )  $\delta$  12.18 (brs, 1H), 7.47 – 7.39 (m, 4H), 7.31 (d,  $J = 7.2$  Hz, 1H), 7.28 – 7.22 (m, 2H), 7.02 (d,  $J = 8.5$  Hz, 1H), 5.88 (ddd,  $J = 16.8, 10.0, 6.7$  Hz, 1H), 5.14 (d,  $J = 10.0$  Hz, 1H), 5.11 (d,  $J = 16.8$  Hz, 1H), 4.97 (d,  $J = 6.7$  Hz, 1H).  $^{13}\text{C NMR}$  (100 MHz,  $\text{CDCl}_3$ )  $\delta$  156.5, 146.6, 136.6, 134.9, 131.2, 129.6(2C), 129.4, 128.7, 126.8, 125.1, 123.4(2C), 117.7, 116.4, 107.7, 39.6. **HRMS** (EI-TOF)  $m/z$ :  $[\text{M}]^+$  calcd for  $\text{C}_{17}\text{H}_{13}^{35}\text{ClN}_2\text{O}_3$ : 328.0610, found: 328.0611;  $\text{C}_{17}\text{H}_{13}^{37}\text{ClN}_2\text{O}_3$ : 330.0580, found: 328.0589;  $[\alpha]_{\text{D}}^{25} = +23.9$  ( $c$  0.20,  $\text{CH}_2\text{Cl}_2$ ); **HPLC** (Chiralpak AS-H,  $n$ -hexane/ethanol = 80/20, flow rate = 1.0 mL/min,  $\lambda = 220$  nm)  $t_{\text{R}} = 8.652$  min (minor), 11.454 min (major).

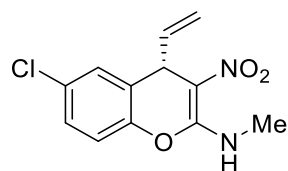

**(S)-6-Chloro-N-methyl-3-nitro-4-vinyl-4H-chromen-2-amine (29):** Following the general procedure A, compound **29** was obtained as a yellow solid in 99% yield (26.3mg), 86% ee;  $R_f = 0.4$  (petroleum ether/ethyl acetate = 4/1); m.p: 156 – 158 °C;  $^1\text{H NMR}$  (400 MHz,  $\text{CDCl}_3$ )  $\delta$  10.41 (brs, 1H), 7.29 – 7.22 (m, 2H), 7.11 – 7.04 (m, 1H), 5.83 (ddd,  $J = 16.8, 10.0, 6.6$  Hz, 1H), 5.09 (d,  $J = 10.0$  Hz, 1H), 5.04 (d,  $J = 16.9$  Hz, 1H), 4.89 (d,  $J = 6.6$  Hz, 1H), 3.22 (d,  $J =$

5.2 Hz, 3H).  $^{13}\text{C}$  NMR (100 MHz,  $\text{CDCl}_3$ )  $\delta$  159.5, 146.7, 136.8, 130.9, 129.5, 128.6, 125.2, 117.6, 116.0, 106.7, 39.6, 28.1. **HRMS** (EI-TOF)  $m/z$ :  $[\text{M}]^+$  calcd for  $\text{C}_{12}\text{H}_{11}^{35}\text{ClN}_2\text{O}_3$ : 266.0453, found: 266.0457;  $\text{C}_{12}\text{H}_{11}^{37}\text{ClN}_2\text{O}_3$ : 268.0424, found: 268.0427;  $[\alpha]_{\text{D}}^{25} = +27.6$  ( $c$  0.20,  $\text{CH}_2\text{Cl}_2$ ); **HPLC** (Chiralpak AS-H,  $n$ -hexane/ethanol = 80/20, flow rate = 1.0 mL/min,  $\lambda$  = 220 nm)  $t_{\text{R}}$  = 10.521 min (minor), 21.262 min (major).

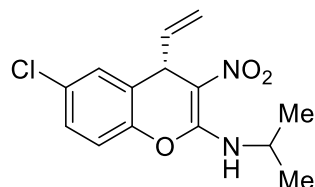

**(S)-6-Chloro-N-isopropyl-3-nitro-4-vinyl-4H-chromen-2-amine (30)**: Following the general procedure A, compound **30** was obtained as a yellow solid in 85% yield (24.9mg), 90% ee;  $R_{\text{f}}$  = 0.4 (petroleum ether/ethyl acetate = 4/1); m.p: 153 – 155 °C;  $^1\text{H}$  NMR (400 MHz,  $\text{CDCl}_3$ )  $\delta$  10.37 (brs, 1H), 7.25 (d,  $J$  = 7.6 Hz, 2H), 7.10 – 7.03 (m, 1H), 5.84 (ddd,  $J$  = 16.8, 10.0, 6.6 Hz, 1H), 5.08 (d,  $J$  = 9.9 Hz, 1H), 5.04 (d,  $J$  = 16.9 Hz, 1H), 4.89 (d,  $J$  = 6.7 Hz, 1H), 4.33 – 4.24 (m, 1H), 1.40 (d,  $J$  = 6.6 Hz, 3H), 1.38 (d,  $J$  = 6.5 Hz, 3H).  $^{13}\text{C}$  NMR (100 MHz,  $\text{CDCl}_3$ )  $\delta$  158.2, 146.7, 136.7, 130.8, 129.3, 128.5, 125.2, 117.5, 115.9, 106.2, 44.5, 39.5, 23.3, 23.2. **HRMS** (EI-TOF)  $m/z$ :  $[\text{M}]^+$  calcd for  $\text{C}_{14}\text{H}_{15}^{35}\text{ClN}_2\text{O}_3$ : 294.0766, found: 294.0774;  $\text{C}_{14}\text{H}_{15}^{37}\text{ClN}_2\text{O}_3$ : 296.0737, found: 294.0743;  $[\alpha]_{\text{D}}^{25} = -0.1$  ( $c$  0.20,  $\text{CH}_2\text{Cl}_2$ ); **HPLC** (Chiralpak AS-H,  $n$ -hexane/ethanol = 80/20, flow rate = 1.0 mL/min,  $\lambda$  = 220 nm)  $t_{\text{R}}$  = 6.428 min (minor), 16.698 min (major).

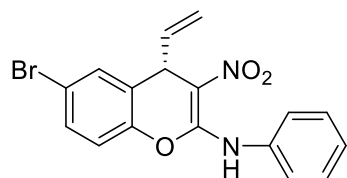

**(S)-6-Bromo-3-nitro-N-phenyl-4-vinyl-4H-chromen-2-amine (31)**: Following the general procedure A, compound **31** was obtained as a yellow solid in 99% yield (36.8mg), 95% ee;  $R_{\text{f}}$  = 0.6 ( $\text{CH}_2\text{Cl}_2$ ); m.p: 135 – 137 °C;  $^1\text{H}$  NMR (400 MHz,  $\text{CDCl}_3$ )  $\delta$  12.18 (brs, 1H), 7.52 – 7.35 (m, 6H), 7.35 – 7.26 (m, 1H), 6.96 (d,  $J$  = 8.7 Hz, 1H), 5.88 (ddd,  $J$  = 16.8, 10.0, 6.7 Hz, 1H), 5.14 (d,  $J$  = 7.2 Hz, 1H), 5.11 (d,  $J$  = 14.1 Hz, 1H), 4.97 (d,  $J$  = 6.8 Hz, 1H).  $^{13}\text{C}$  NMR (100 MHz,  $\text{CDCl}_3$ )  $\delta$  156.5, 147.1, 136.6, 134.9, 132.4, 131.6, 129.6(2C), 126.8, 125.5, 123.4(2C), 118.7, 118.1, 116.5, 107.7, 39.5. **HRMS** (EI-TOF)  $m/z$ :  $[\text{M}]^+$  calcd for  $\text{C}_{17}\text{H}_{13}^{79}\text{BrN}_2\text{O}_3$ : 372.0105, found: 372.0112;  $\text{C}_{17}\text{H}_{13}^{81}\text{BrN}_2\text{O}_3$ : 374.0084, found: 374.0085;  $[\alpha]_{\text{D}}^{25} = +18.2$  ( $c$  0.20,  $\text{CH}_2\text{Cl}_2$ ); **HPLC** (Chiralpak AS-H,  $n$ -hexane/ethanol = 80/20, flow rate = 1.0 mL/min,  $\lambda$  = 220 nm)  $t_{\text{R}}$  = 8.859 min (minor), 11.241 min (major).

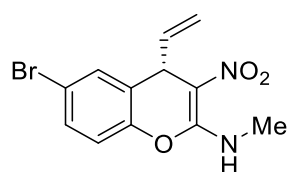

**(S)-6-Bromo-N-methyl-3-nitro-4-vinyl-4H-chromen-2-amine (32):** Following the general procedure A, compound **32** was obtained as a yellow solid in 98% yield (30.3mg), 78% ee;  $R_f = 0.4$  (petroleum ether/ethyl acetate = 4/1); m.p: 188 – 190 °C;  $^1\text{H NMR}$  (400 MHz,  $\text{CDCl}_3$ )  $\delta$  10.41 (brs, 1H), 7.43 – 7.36 (m, 2H), 7.06 – 6.99 (m, 1H), 5.83 (ddd,  $J = 16.8, 9.9, 6.7$  Hz, 1H), 5.09 (d,  $J = 10.0$  Hz, 1H), 5.04 (d,  $J = 16.9$  Hz, 1H), 4.88 (d,  $J = 6.7$  Hz, 1H), 3.22 (d,  $J = 5.3$  Hz, 3H).  $^{13}\text{C NMR}$  (100 MHz,  $\text{CDCl}_3$ )  $\delta$  159.4, 147.2, 136.8, 132.4, 131.5, 125.6, 118.4, 117.9, 116.0, 106.6, 39.5, 28.1. **HRMS** (EI-TOF)  $m/z$ :  $[\text{M}]^+$  calcd for  $\text{C}_{12}\text{H}_{11}^{79}\text{BrN}_2\text{O}_3$ : 309.9948, found: 309.9957;  $\text{C}_{12}\text{H}_{11}^{81}\text{BrN}_2\text{O}_3$ : 311.9928, found: 311.9934;  $[\alpha]_{\text{D}}^{25} = +20.9$  ( $c$  0.20,  $\text{CH}_2\text{Cl}_2$ ); **HPLC** (Chiralpak AS-H,  $n$ -hexane/ethanol = 80/20, flow rate = 1.0 mL/min,  $\lambda = 220$  nm)  $t_{\text{R}} = 10.335$  min (minor), 17.279 min (major).

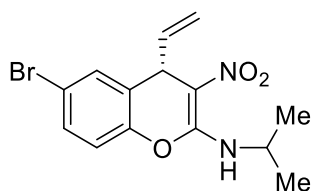

**(S)-6-Bromo-N-isopropyl-3-nitro-4-vinyl-4H-chromen-2-amine (33):** Following the general procedure A, compound **33** was obtained as a yellow solid in 88% yield (29.7mg), 84% ee;  $R_f = 0.4$  (petroleum ether/ethyl acetate = 4/1); m.p: 144 – 146 °C;  $^1\text{H NMR}$  (400 MHz,  $\text{CDCl}_3$ )  $\delta$  10.38 (brs, 1H), 7.41 – 7.38 (m, 2H), 7.00 (d,  $J = 9.2$  Hz, 1H), 5.84 (ddd,  $J = 16.8, 10.0, 6.6$  Hz, 1H), 5.09 (d,  $J = 10.0$  Hz, 1H), 5.04 (d,  $J = 17.0$  Hz, 1H), 4.90 (d,  $J = 6.6$  Hz, 1H), 4.33 – 4.20 (m, 1H), 1.40 (d,  $J = 6.6$  Hz, 3H), 1.37 (d,  $J = 6.5$  Hz, 3H).  $^{13}\text{C NMR}$  (100 MHz,  $\text{CDCl}_3$ )  $\delta$  158.2, 147.4, 136.8, 132.4, 131.5, 125.8, 118.4, 117.9, 116.0, 106.3, 44.6, 39.5, 23.4, 23.3. **HRMS** (EI-TOF)  $m/z$ :  $[\text{M}]^+$  calcd for  $\text{C}_{14}\text{H}_{15}^{79}\text{BrN}_2\text{O}_3$ : 338.0261, found: 338.0265;  $\text{C}_{14}\text{H}_{15}^{81}\text{BrN}_2\text{O}_3$ : 340.0241, found: 340.0248;  $[\alpha]_{\text{D}}^{25} = +8.3$  ( $c$  0.20,  $\text{CH}_2\text{Cl}_2$ ); **HPLC** (Chiralpak AS-H,  $n$ -hexane/ethanol = 80/20, flow rate = 1.0 mL/min,  $\lambda = 220$  nm)  $t_{\text{R}} = 6.076$  min (minor), 12.532 min (major).

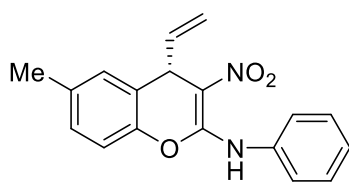

**(S)-6-Methyl-3-nitro-N-phenyl-4-vinyl-4H-chromen-2-amine (34):** Following the general procedure A, compound **34** was obtained as a yellow solid in 98% yield (30.2 mg), 89% ee;  $R_f = 0.5$  ( $\text{CH}_2\text{Cl}_2$ ); m.p: 168 – 170 °C;  $^1\text{H NMR}$  (400 MHz,  $\text{CDCl}_3$ )  $\delta$  12.31 (brs, 1H), 7.46 – 7.41 (m, 4H), 7.31 – 7.26 (m, 1H), 7.06 (dd,  $J = 5.7, 2.4$  Hz, 2H), 6.96 (d,  $J = 8.9$  Hz, 1H), 5.90 (ddd,  $J = 17.4, 9.5, 6.6$  Hz, 1H), 5.11 (d,  $J = 10$  Hz, 1H), 5.07 (d,  $J = 16.8$  Hz, 1H), 4.95 (d,  $J = 6.6$  Hz, 1H), 2.34 (s, 3H).  $^{13}\text{C NMR}$  (100 MHz,  $\text{CDCl}_3$ )  $\delta$  157.0, 146.0, 137.2, 135.9, 135.2, 129.8, 129.5(2C), 129.2, 126.5, 123.2(2C), 122.9, 115.9, 115.7, 108.2, 39.6, 20.9. **HRMS** (EI-TOF)  $m/z$ :  $[\text{M}]^+$  calcd for  $\text{C}_{18}\text{H}_{16}\text{N}_2\text{O}_3$ : 308.1155, found: 308.1158;  $[\alpha]_{\text{D}}^{25} = +22.1$  ( $c$  0.20,  $\text{CH}_2\text{Cl}_2$ ); **HPLC** (Chiralpak AS-H,  $n$ -hexane/ethanol = 80/20, flow rate = 1.0 mL/min,  $\lambda = 220$  nm)  $t_{\text{R}} = 8.094$  min (minor), 14.282 min (major).

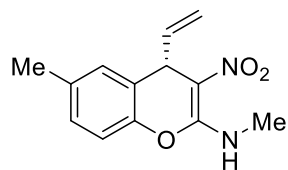

**(S)-N,6-Dimethyl-3-nitro-4-vinyl-4H-chromen-2-amine (35):** Following the general procedure A, compound **35** was obtained as a yellow solid in 98% yield (24.1mg), 64% ee;  $R_f = 0.4$  (petroleum ether/ethyl acetate = 4/1); m.p: 151 – 153 °C;  $^1\text{H NMR}$  (400 MHz,  $\text{CDCl}_3$ )  $\delta$  10.49 (brs, 1H), 7.14 – 6.95 (m, 3H), 5.85 (ddd,  $J = 16.8, 10.0, 6.6$  Hz, 1H), 5.04 (d,  $J = 10.0$  Hz, 1H), 5.01 (d,  $J = 16.4$  Hz, 1H), 4.87 (d,  $J = 6.7$  Hz, 1H), 3.21 (d,  $J = 5.2$  Hz, 3H), 2.34 (s, 3H).  $^{13}\text{C NMR}$  (100 MHz,  $\text{CDCl}_3$ )  $\delta$  160.0, 146.1, 137.4, 135.6, 129.8, 129.0, 122.9, 115.9, 115.2, 107.2, 39.6, 27.9, 20.8. **HRMS** (EI-TOF)  $m/z$ :  $[\text{M}]^+$  calcd for  $\text{C}_{13}\text{H}_{14}\text{N}_2\text{O}_3$ : 246.0999, found: 246.1006;  $[\alpha]_{\text{D}}^{25} = +22.6$  ( $c$  0.20,  $\text{CH}_2\text{Cl}_2$ ); **HPLC** (Chiralpak AS-H,  $n$ -hexane/ethanol = 80/20, flow rate = 1.0 mL/min,  $\lambda = 220$  nm)  $t_{\text{R}} = 9.497$  min (minor), 29.834 min (major).

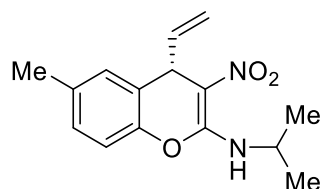

**(S)-N-Isopropyl-6-methyl-3-nitro-4-vinyl-4H-chromen-2-amine (36):** Following the general procedure A, compound **36** was obtained as a yellow solid in 82% yield (22.5mg), 65% ee;  $R_f = 0.4$  (petroleum ether/ethyl acetate = 4/1); m.p: 104 – 106 °C;  $^1\text{H NMR}$  (400 MHz,  $\text{CDCl}_3$ )  $\delta$  10.48 (brs, 1H), 7.06 (d,  $J = 8.1$  Hz, 1H), 7.04 (s, 1H), 6.99 (d,  $J = 8.2$  Hz, 1H), 5.86 (ddd,  $J = 16.7, 10.0, 6.5$  Hz, 1H), 5.05 (d,  $J = 8.8$  Hz, 1H), 5.01 (d,  $J = 15.8$  Hz, 1H), 4.89 (d,  $J = 6.4$  Hz, 1H), 4.32 – 4.24 (m, 1H), 2.34 (s, 3H), 1.39 (d,  $J = 6.6$  Hz, 3H), 1.37 (d,  $J = 6.5$  Hz, 3H).  $^{13}\text{C NMR}$  (100 MHz,  $\text{CDCl}_3$ )  $\delta$  158.8, 146.3, 137.4, 135.6, 129.9, 129.0, 123.1, 115.8, 115.2, 106.9, 44.4, 39.7, 23.4, 23.2, 20.9. **HRMS** (EI-TOF)  $m/z$ :  $[\text{M}]^+$  calcd for  $\text{C}_{15}\text{H}_{18}\text{N}_2\text{O}_3$ : 274.1312, found: 274.1320;  $[\alpha]_{\text{D}}^{25} = +15.8$  ( $c$  0.20,  $\text{CH}_2\text{Cl}_2$ ); **HPLC** (Chiralpak AS-H,  $n$ -hexane/ethanol = 80/20, flow rate = 1.0 mL/min,  $\lambda = 220$  nm)  $t_{\text{R}} = 5.824$  min (minor), 22.793 min (major).

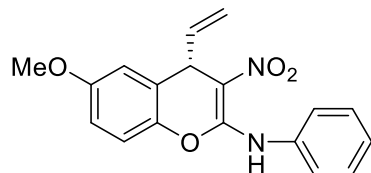

**(S)-6-Methoxy-3-nitro-N-phenyl-4-vinyl-4H-chromen-2-amine (37):** Following the general procedure A, compound **37** was obtained as a yellow solid in 97% yield (31.4 mg), 99% ee;  $R_f = 0.5$  ( $\text{CH}_2\text{Cl}_2$ ); m.p: 155 – 157 °C;  $^1\text{H NMR}$  (400 MHz,  $\text{CDCl}_3$ )  $\delta$  12.29 (brs, 1H), 7.49 – 7.38 (m, 4H), 7.33 – 7.27 (m, 1H), 7.01 (d,  $J = 8.9$  Hz, 1H), 6.84 – 6.73 (m, 2H), 5.91 (ddd,  $J = 16.7, 9.7, 6.6$  Hz, 1H), 5.12 (d,  $J = 9.6$  Hz, 1H), 5.09 (d,  $J = 17.2$  Hz, 1H), 4.98 (d,  $J = 6.6$  Hz, 1H), 3.81 (s, 3H).  $^{13}\text{C NMR}$  (100 MHz,  $\text{CDCl}_3$ )  $\delta$  157.4, 157.0, 142.1, 136.9, 135.2, 129.5(2C), 126.5, 124.2, 123.2(2C), 117.2, 115.9, 114.5, 113.5, 107.9, 55.9, 40.0. **HRMS** (EI-TOF)  $m/z$ :



[M]<sup>+</sup> calcd for C<sub>18</sub>H<sub>16</sub>N<sub>2</sub>O<sub>4</sub>: 324.1105, found: 324.1113; [α]<sub>D</sub><sup>25</sup> = +14.5 (*c* 0.20, CH<sub>2</sub>Cl<sub>2</sub>); **HPLC** (Chiralpak AS-H, *n*-hexane/ethanol = 80/20, flow rate = 1.0 mL/min, λ = 220 nm) t<sub>R</sub> = 12.304 min (minor), 19.211 min (major).

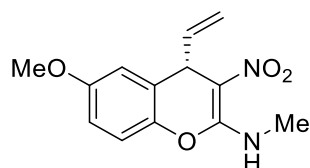

**(S)-6-Methoxy-N-methyl-3-nitro-4-vinyl-4H-chromen-2-amine (38)**: Following the general procedure A, compound **38** was obtained as a yellow solid in 80% yield (20.9mg), 52% ee; R<sub>f</sub> = 0.4 (petroleum ether/ethyl acetate = 4/1); m.p: 155 – 157 °C; **<sup>1</sup>H NMR** (400 MHz, CDCl<sub>3</sub>) δ 10.47 (brs, 1H), 7.05 (d, *J* = 8.9 Hz, 1H), 6.81 (d, *J* = 9.1 Hz, 1H), 6.73 (s, 1H), 5.86 (ddd, *J* = 15.8, 8.7, 6.6 Hz, 1H), 5.06 (d, *J* = 8.0 Hz, 1H), 5.03 (d, *J* = 15.3 Hz, 1H), 4.89 (d, *J* = 6.6 Hz, 1H), 3.80 (s, 3H), 3.20 (d, *J* = 5.2 Hz, 3H). **<sup>13</sup>C NMR** (100 MHz, CDCl<sub>3</sub>) δ 160.0, 157.2, 142.2, 137.2, 124.3, 117.1, 115.4, 114.4, 113.5, 106.9, 55.8, 39.9, 27.9. **HRMS** (EI-TOF) m/z: [M]<sup>+</sup> calcd for C<sub>13</sub>H<sub>14</sub>N<sub>2</sub>O<sub>4</sub>: 262.0948, found: 262.0951; [α]<sub>D</sub><sup>25</sup> = +15.7 (*c* 0.20, CH<sub>2</sub>Cl<sub>2</sub>); **HPLC** (Chiralpak IC-H, *n*-hexane/ethanol = 80/20, flow rate = 1.0 mL/min, λ = 220 nm) t<sub>R</sub> = 35.147 min (major), 47.328 min (minor).

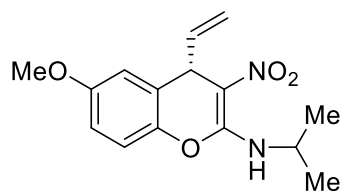

**(S)-N-Isopropyl-6-methoxy-3-nitro-4-vinyl-4H-chromen-2-amine (39)**: Following the general procedure A, compound **39** was obtained as a yellow solid in 86% yield (24.9mg), 41% ee; R<sub>f</sub> = 0.4 (petroleum ether/ethyl acetate = 4/1); m.p: 103 – 105 °C; **<sup>1</sup>H NMR** (400 MHz, CDCl<sub>3</sub>) δ 10.45 (brs, 1H), 7.03 (d, *J* = 8.9 Hz, 1H), 6.81 (dd, *J* = 8.9, 3.0 Hz, 1H), 6.74 (d, *J* = 3.0 Hz, 1H), 5.87 (ddd, *J* = 16.5, 10.3, 6.2 Hz, 1H), 5.06 (d, *J* = 8.8 Hz, 1H), 5.03 (d, *J* = 14.6 Hz, 1H), 4.90 (d, *J* = 6.4 Hz, 1H), 4.32 – 4.23 (m, 1H), 3.80 (s, 3H), 1.39 (d, *J* = 6.6 Hz, 3H), 1.37 (d, *J* = 6.4 Hz, 3H). **<sup>13</sup>C NMR** (100 MHz, CDCl<sub>3</sub>) δ 158.8, 157.1, 142.3, 137.1, 124.4, 116.9, 115.4, 114.4, 113.5, 106.6, 55.8, 44.4, 39.9, 23.3, 23.2. **HRMS** (EI-TOF) m/z: [M]<sup>+</sup> calcd for C<sub>15</sub>H<sub>18</sub>N<sub>2</sub>O<sub>4</sub>: 290.1261, found: 290.1265; [α]<sub>D</sub><sup>25</sup> = +4.8 (*c* 0.20, CH<sub>2</sub>Cl<sub>2</sub>); **HPLC** (Chiralpak AS-H, *n*-hexane/ethanol = 80/20, flow rate = 1.0 mL/min, λ = 220 nm) t<sub>R</sub> = 7.312 min (minor), 26.847 min (major).

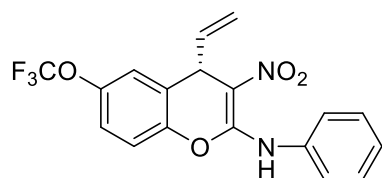

**(S)-3-Nitro-N-phenyl-6-(trifluoromethoxy)-4-vinyl-4H-chromen-2-amine (40)**: Following the general procedure A, compound **40** was obtained as a yellow solid in 97% yield (36.7mg),

90% ee;  $R_f = 0.6$  ( $\text{CH}_2\text{Cl}_2$ ); m.p: 96 – 98 °C;  $^1\text{H NMR}$  (400 MHz,  $\text{CDCl}_3$ )  $\delta$  12.16 (brs, 1H), 7.48 – 7.44 (m, 2H), 7.43 – 7.38 (m, 2H), 7.34 – 7.29 (m, 1H), 7.17 – 7.09 (m, 3H), 5.90 (ddd,  $J = 16.8, 10.0, 6.7$  Hz, 1H), 5.15 (d,  $J = 10.0$  Hz, 1H), 5.11 (d,  $J = 16.9$  Hz, 1H), 5.02 (d,  $J = 6.6$  Hz, 1H).  $^{13}\text{C NMR}$  (100 MHz,  $\text{CDCl}_3$ )  $\delta$  156.5, 146.5, 146.3, 136.5, 134.9, 129.6(2C), 126.9, 125.2, 123.5(2C), 122.2, 121.5, 120.5 (q,  $^1J_{\text{C-F}} = 256.5$  Hz), 117.8, 116.5, 107.5, 39.7.  $^{19}\text{F NMR}$  (376 MHz,  $\text{CDCl}_3$ )  $\delta$  -58.23(s). **HRMS** (EI-TOF)  $m/z$ :  $[\text{M}]^+$  calcd for  $\text{C}_{18}\text{H}_{13}\text{F}_3\text{N}_2\text{O}_4$ : 378.0822, found: 378.0824;  $[\alpha]_{\text{D}}^{25} = +16.2$  ( $c$  0.20,  $\text{CH}_2\text{Cl}_2$ ); **HPLC** (Chiralpak AS-H,  $n$ -hexane/ethanol = 80/20, flow rate = 1.0 mL/min,  $\lambda = 220$  nm)  $t_{\text{R}} = 5.547$  min (minor), 7.354 min (major).

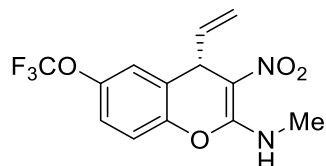

**(S)-N-Methyl-3-nitro-6-(trifluoromethoxy)-4-vinyl-4H-chromen-2-amine (41)**: Following the general procedure A, compound **41** was obtained as a yellow solid in 98% yield (30.9mg), 77% ee;  $R_f = 0.4$  (petroleum ether/ethyl acetate = 4/1); m.p: 133 – 135 °C;  $^1\text{H NMR}$  (400 MHz,  $\text{CDCl}_3$ )  $\delta$  10.40 (brs, 1H), 7.19 – 7.16 (m, 2H), 7.13 (s), 5.85 (ddd,  $J = 16.7, 10.0, 6.5$  Hz, 1H), 5.10 (d,  $J = 9.9$  Hz, 1H), 5.03 (d,  $J = 16.9$  Hz, 1H), 4.93 (d,  $J = 6.6$  Hz, 1H), 3.23 (d,  $J = 5.2$  Hz, 3H).  $^{13}\text{C NMR}$  (100 MHz,  $\text{CDCl}_3$ )  $\delta$  159.5, 146.4, 146.3, 136.7, 125.3, 122.2, 121.3, 120.5 (q,  $^1J_{\text{C-F}} = 256.3$  Hz), 117.7, 116.0, 106.5, 39.7, 28.1.  $^{19}\text{F NMR}$  (376 MHz,  $\text{CDCl}_3$ )  $\delta$  -58.25(s). **HRMS** (EI-TOF)  $m/z$ :  $[\text{M}]^+$  calcd for  $\text{C}_{13}\text{H}_{11}\text{F}_3\text{N}_2\text{O}_4$ : 316.0665, found: 316.0673;  $[\alpha]_{\text{D}}^{25} = +16.1$  ( $c$  0.20,  $\text{CH}_2\text{Cl}_2$ ); **HPLC** (Chiralpak AS-H,  $n$ -hexane/ethanol = 80/20, flow rate = 1.0 mL/min,  $\lambda = 220$  nm)  $t_{\text{R}} = 7.580$  min (minor), 10.998 min (major).

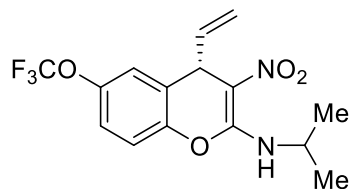

**(S)-N-Isopropyl-3-nitro-6-(trifluoromethoxy)-4-vinyl-4H-chromen-2-amine (42)**: Following the general procedure A, compound **42** was obtained as a yellow solid in 92% yield (31.6mg), 84% ee;  $R_f = 0.4$  (petroleum ether/ethyl acetate = 4/1); m.p: 77 – 79 °C;  $^1\text{H NMR}$  (400 MHz,  $\text{CDCl}_3$ )  $\delta$  10.37 (brs, 1H), 7.17 – 7.12 (m, 3H), 5.86 (ddd,  $J = 16.8, 10.0, 6.4$  Hz, 1H), 5.10 (d,  $J = 9.7$  Hz, 1H), 5.03 (d,  $J = 16.8$  Hz, 1H), 4.95 (d,  $J = 6.7$  Hz, 1H), 4.32 – 4.24 (m, 1H), 1.41 (d,  $J = 6.2$  Hz, 3H), 1.38 (d,  $J = 6.6$  Hz, 3H).  $^{13}\text{C NMR}$  (100 MHz,  $\text{CDCl}_3$ )  $\delta$  158.3, 146.5, 146.3, 136.7, 125.4, 122.3, 121.4, 120.5 (q,  $^1J_{\text{C-F}} = 247.2$  Hz), 117.5, 116.1, 106.1, 44.6, 39.8, 23.4, 23.3.  $^{19}\text{F NMR}$  (376 MHz,  $\text{CDCl}_3$ )  $\delta$  -58.25(s). **HRMS** (EI-TOF)  $m/z$ :  $[\text{M}]^+$  calcd for  $\text{C}_{15}\text{H}_{15}\text{F}_3\text{N}_2\text{O}_4$ : 344.0978, found: 344.0986;  $[\alpha]_{\text{D}}^{25} = +10.9$  ( $c$  0.20,  $\text{CH}_2\text{Cl}_2$ ); **HPLC** (Chiralpak AS-H,  $n$ -hexane/ethanol = 80/20, flow rate = 1.0 mL/min,  $\lambda = 220$  nm)  $t_{\text{R}} = 4.586$  min (minor), 8.490 min (major).

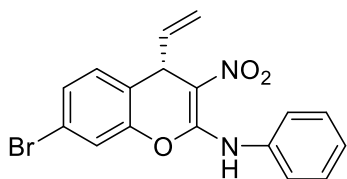

**(S)-7-Bromo-3-nitro-N-phenyl-4-vinyl-4H-chromen-2-amine (43):** Following the general procedure A, compound **43** was obtained as a yellow solid in 99% yield (36.8mg), 95% ee;  $R_f = 0.6$  ( $\text{CH}_2\text{Cl}_2$ ); m.p: 154 – 156 °C;  $^1\text{H NMR}$  (400 MHz,  $\text{CDCl}_3$ )  $\delta$  12.16 (brs, 1H), 7.48 – 7.44 (m, 2H), 7.39 (d,  $J = 7.9$  Hz, 2H), 7.37 – 7.29 (m, 2H), 7.24 (s), 7.16 (d,  $J = 8.2$  Hz, 1H), 5.89 (ddd,  $J = 16.8, 10.0, 6.6$  Hz, 1H), 5.12 (d,  $J = 10.0$  Hz, 1H), 5.07 (d,  $J = 16.9$  Hz, 1H), 4.97 (d,  $J = 6.6$  Hz, 1H).  $^{13}\text{C NMR}$  (100 MHz,  $\text{CDCl}_3$ )  $\delta$  156.5, 148.4, 136.8, 134.9, 130.9, 129.6(2C), 129.3, 126.9, 123.5(2C), 122.5, 121.3, 119.6, 116.2, 107.9, 39.29. **HRMS** (EI-TOF)  $m/z$ :  $[\text{M}]^+$  calcd for  $\text{C}_{17}\text{H}_{13}^{79}\text{BrN}_2\text{O}_3$ : 372.0105, found: 372.0115;  $\text{C}_{17}\text{H}_{13}^{81}\text{BrN}_2\text{O}_3$ : 374.0084, found: 374.0085;  $[\alpha]_{\text{D}}^{25} = +12.8$  ( $c$  0.20,  $\text{CH}_2\text{Cl}_2$ ); **HPLC** (Chiralpak AS-H,  $n$ -hexane/ethanol = 80/20, flow rate = 1.0 mL/min,  $\lambda = 220$  nm)  $t_{\text{R}} = 8.658$  min (minor), 12.162 min (major).

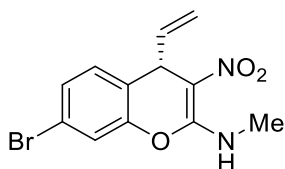

**(S)-7-Bromo-N-methyl-3-nitro-4-vinyl-4H-chromen-2-amine (44):** Following the general procedure A, compound **44** was obtained as a yellow solid in 97% yield (29.9mg), 74% ee;  $R_f = 0.4$  (petroleum ether/ethyl acetate = 4/1); m.p: 126 – 128 °C;  $^1\text{H NMR}$  (400 MHz,  $\text{CDCl}_3$ )  $\delta$  10.41 (brs, 1H), 7.34 – 7.32 (m, 2H), 7.14 (d,  $J = 8.5$  Hz, 1H), 5.84 (ddd,  $J = 16.7, 10.0, 6.5$  Hz, 1H), 5.06 (d,  $J = 10.0$  Hz, 1H), 5.00 (d,  $J = 17.0$  Hz, 1H), 4.88 (d,  $J = 6.4$  Hz, 1H), 3.22 (d,  $J = 5.2$  Hz, 3H).  $^{13}\text{C NMR}$  (100 MHz,  $\text{CDCl}_3$ )  $\delta$  159.4, 148.4, 136.9, 130.9, 128.9, 122.5, 121.1, 119.5, 115.8, 106.8, 39.2, 28.1. **HRMS** (EI-TOF)  $m/z$ :  $[\text{M}]^+$  calcd for  $\text{C}_{12}\text{H}_{11}^{79}\text{BrN}_2\text{O}_3$ : 309.9948, found: 309.9952;  $\text{C}_{12}\text{H}_{11}^{81}\text{BrN}_2\text{O}_3$ : 311.9928, found: 311.9934;  $[\alpha]_{\text{D}}^{25} = +9.8$  ( $c$  0.20,  $\text{CH}_2\text{Cl}_2$ ); **HPLC** (Chiralpak AS-H,  $n$ -hexane/ethanol = 80/20, flow rate = 1.0 mL/min,  $\lambda = 220$  nm)  $t_{\text{R}} = 12.740$  min (minor), 34.731 min (major).

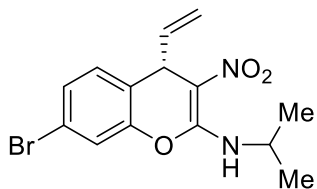

**(S)-7-Bromo-N-isopropyl-3-nitro-4-vinyl-4H-chromen-2-amine (45):** Following the general procedure A, compound **45** was obtained as a yellow solid in 92% yield (31.1mg), 64% ee;  $R_f = 0.4$  (petroleum ether/ethyl acetate = 4/1); m.p: 156 – 158 °C;  $^1\text{H NMR}$  (400 MHz,  $\text{CDCl}_3$ )  $\delta$  10.38 (brs, 1H), 7.35 – 7.29 (m, 2H), 7.14 (d,  $J = 8.2$  Hz, 1H), 5.85 (ddd,  $J = 16.7, 10.0, 6.4$  Hz, 1H), 5.07 (d,  $J = 10.0$  Hz, 1H), 5.00 (d,  $J = 16.9$  Hz, 1H), 4.90 (d,  $J = 6.4$  Hz, 1H), 4.35 – 4.18 (m, 1H), 1.40 (d,  $J = 6.6$  Hz, 3H), 1.37 (d,  $J = 6.5$  Hz, 3H).  $^{13}\text{C NMR}$  (100 MHz,  $\text{CDCl}_3$ )  $\delta$  158.2, 148.6, 136.9, 131.0, 128.9, 122.7, 121.2, 119.5, 115.8, 106.5, 44.6, 39.3, 23.4, 23.3.

**HRMS** (EI-TOF)  $m/z$ :  $[M]^+$  calcd for  $C_{14}H_{15}^{79}BrN_2O_3$ : 338.0261, found: 338.0262;  $C_{14}H_{15}^{81}BrN_2O_3$ : 340.0241, found: 340.0249;  $[\alpha]_D^{25} = +5.0$  ( $c$  0.20,  $CH_2Cl_2$ ); **HPLC** (Chiralpak AS-H, *n*-hexane/ethanol = 80/20, flow rate = 1.0 mL/min,  $\lambda = 220$  nm)  $t_R = 6.125$  min (minor), 13.359 min (major).

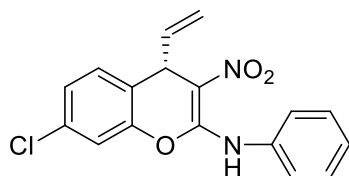

**(S)-7-Chloro-3-nitro-N-phenyl-4-vinyl-4H-chromen-2-amine (46)**: Following the general procedure A, compound **46** was obtained as a yellow solid in 96% yield (31.6mg), 88% ee;  $R_f = 0.6$  ( $CH_2Cl_2$ ); m.p: 163 – 165 °C;  $^1H$  NMR (400 MHz,  $CDCl_3$ )  $\delta$  12.16 (brs, 1H), 7.48 – 7.44 (m, 2H), 7.39 (d,  $J = 7.8$  Hz, 2H), 7.33 – 7.30 (m, 1H), 7.24 – 7.19 (m, 2H), 7.09 (d,  $J = 1.9$  Hz, 1H), 5.89 (ddd,  $J = 16.7, 10.0, 6.6$  Hz, 1H), 5.12 (d,  $J = 9.8$  Hz, 1H), 5.07 (d,  $J = 17.2$  Hz, 1H), 4.98 (d,  $J = 6.6$  Hz, 1H).  $^{13}C$  NMR (100 MHz,  $CDCl_3$ )  $\delta$  156.5, 148.3, 136.9, 134.9, 133.9, 130.7, 129.6(2C), 126.9, 126.4, 123.5(2C), 121.9, 116.7, 116.2, 107.9, 39.2. **HRMS** (EI-TOF)  $m/z$ :  $[M]^+$  calcd for  $C_{17}H_{13}^{35}ClN_2O_3$ : 328.0610, found: 328.0612;  $C_{17}H_{13}^{37}ClN_2O_3$ : 330.0580, found: 328.0583;  $[\alpha]_D^{25} = +21.6$  ( $c$  0.20,  $CH_2Cl_2$ ); **HPLC** (Chiralpak AS-H, *n*-hexane/ethanol = 80/20, flow rate = 1.0 mL/min,  $\lambda = 220$  nm)  $t_R = 8.275$  min (minor), 11.256 min (major).

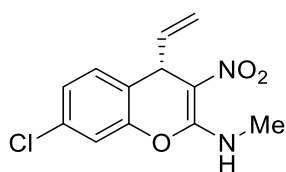

**(S)-7-Chloro-N-methyl-3-nitro-4-vinyl-4H-chromen-2-amine (47)**: Following the general procedure A, compound **47** was obtained as a yellow solid in 87% yield (23.1mg), 89% ee;  $R_f = 0.4$  (petroleum ether/ethyl acetate = 4/1); m.p: 138 – 140 °C;  $^1H$  NMR (400 MHz,  $CDCl_3$ )  $\delta$  10.42 (brs, 1H), 7.19 (d,  $J = 1.6$  Hz, 2H), 7.17 (s, 1H), 5.84 (ddd,  $J = 16.7, 10.0, 6.5$  Hz, 1H), 5.07 (d,  $J = 10.0$  Hz, 1H), 5.00 (d,  $J = 16.9$  Hz, 1H), 4.90 (d,  $J = 6.6$  Hz, 1H), 3.22 (d,  $J = 5.2$  Hz, 3H).  $^{13}C$  NMR (100 MHz,  $CDCl_3$ )  $\delta$  159.4, 148.4, 137.0, 133.7, 130.7, 126.1, 122.0, 116.7, 115.8, 106.9, 39.2, 28.1. **HRMS** (EI-TOF)  $m/z$ :  $[M]^+$  calcd for  $C_{12}H_{11}^{35}ClN_2O_3$ : 266.0453, found: 266.0454;  $C_{12}H_{11}^{37}ClN_2O_3$ : 268.0424, found: 268.0430;  $[\alpha]_D^{25} = -9.7$  ( $c$  0.20,  $CH_2Cl_2$ ); **HPLC** (Chiralpak AS-H, *n*-hexane/ethanol = 80/20, flow rate = 1.0 mL/min,  $\lambda = 220$  nm)  $t_R = 10.726$  min (minor), 25.968 min (major).

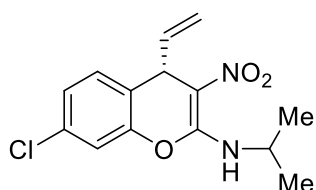

**(S)-7-Chloro-N-isopropyl-3-nitro-4-vinyl-4H-chromen-2-amine (48)**: Following the general procedure A, compound **48** was obtained as a yellow solid in 78% yield (22.9mg), 78% ee;  $R_f$

= 0.4 (petroleum ether/ethyl acetate = 4/1); m.p: 157 – 159 °C; **<sup>1</sup>H NMR** (400 MHz, CDCl<sub>3</sub>) δ 10.39 (brs, 1H), 7.22 – 7.19 (m, 2H), 7.15 (d, *J* = 1.7 Hz, 1H), 5.85 (ddd, *J* = 16.7, 10.0, 6.5 Hz, 1H), 5.07 (d, *J* = 10.0 Hz, 1H), 5.00 (d, *J* = 17.0 Hz, 1H), 4.91 (d, *J* = 6.4 Hz, 1H), 4.34 – 4.21 (m, 1H), 1.40 (d, *J* = 6.6 Hz, 3H), 1.38 (d, *J* = 6.5 Hz, 3H). **<sup>13</sup>C NMR** (100 MHz, CDCl<sub>3</sub>) δ 158.2, 148.5, 136.9, 133.7, 130.7, 126.1, 122.1, 116.6, 115.7, 106.5, 44.6, 39.2, 23.4, 23.2. **HRMS** (EI-TOF) *m/z*: [M]<sup>+</sup> calcd for C<sub>14</sub>H<sub>15</sub><sup>35</sup>ClN<sub>2</sub>O<sub>3</sub>: 294.0766, found: 294.0773; C<sub>14</sub>H<sub>15</sub><sup>37</sup>ClN<sub>2</sub>O<sub>3</sub>: 296.0737, found: 294.0739; [α]<sub>D</sub><sup>25</sup> = +33.3 (*c* 0.20, CH<sub>2</sub>Cl<sub>2</sub>); **HPLC** (Chiralpak AS-H, *n*-hexane/ethanol = 80/20, flow rate = 1.0 mL/min, λ = 220 nm) *t*<sub>R</sub> = 6.020 min (minor), 12.457 min (major).

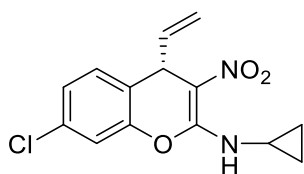

**(S)-7-Chloro-N-cyclopropyl-3-nitro-4-vinyl-4H-chromen-2-amine (49):** Following the general procedure A, compound **49** was obtained as a yellow solid in 86% yield (25.1 mg), 69% ee; *R*<sub>f</sub> = 0.3 (petroleum ether/ethyl acetate = 4/1); m.p: 164 – 166 °C; **<sup>1</sup>H NMR** (400 MHz, CDCl<sub>3</sub>) δ 10.27 (brs, 1H), 7.21 – 7.17(m, 3H), 5.84 (ddd, *J* = 16.7, 10.0, 6.6 Hz, 1H), 5.07 (d, *J* = 10.0 Hz, 1H), 5.01 (d, *J* = 16.9 Hz, 1H), 4.89 (d, *J* = 6.6 Hz, 1H), 2.97 – 3.03 (m, 1H), 1.02 – 0.97 (m, 2H), 0.91 – 0.72 (m, 2H). **<sup>13</sup>C NMR** (100 MHz, CDCl<sub>3</sub>) δ 160.5, 148.5, 137.1, 133.8, 130.7, 126.1, 122.1, 116.8, 115.9, 107.2, 39.2, 24.0, 7.5, 7.5. **HRMS** (EI-TOF) *m/z*: [M]<sup>+</sup> calcd for C<sub>14</sub>H<sub>13</sub><sup>35</sup>ClN<sub>2</sub>O<sub>3</sub>: 292.0610, found: 292.0611; C<sub>14</sub>H<sub>13</sub><sup>37</sup>ClN<sub>2</sub>O<sub>3</sub>: 294.0580, found: 294.0586; [α]<sub>D</sub><sup>25</sup> = +7.7 (*c* 0.20, CH<sub>2</sub>Cl<sub>2</sub>); **HPLC** (Chiralpak AS-H, *n*-hexane/ethanol = 80/20, flow rate = 1.0 mL/min, λ = 220 nm) *t*<sub>R</sub> = 7.562 min (minor), 16.631 min (major).

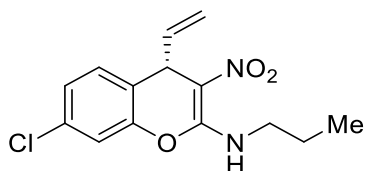

**(S)-7-Chloro-3-nitro-N-propyl-4-vinyl-4H-chromen-2-amine (50):** Following the general procedure A, compound **50** was obtained as a yellow solid in 90% yield (25.1 mg), 58% ee; *R*<sub>f</sub> = 0.3 (petroleum ether/ethyl acetate = 4/1); m.p: 113 – 115 °C; **<sup>1</sup>H NMR** (400 MHz, CDCl<sub>3</sub>) δ 10.51 (brs, 1H), 7.19 (d, *J* = 2.4 Hz, 2H), 7.15 (s, 1H), 5.85 (ddd, *J* = 16.7, 9.9, 6.4 Hz, 1H), 5.07 (d, *J* = 10.0 Hz, 1H), 5.00 (d, *J* = 17.0 Hz, 1H), 4.91 (d, *J* = 6.4 Hz, 1H), 3.60 – 3.51 (m, 2H), 1.80 – 1.71 (m, 2H), 1.05 (t, *J* = 7.4 Hz, 3H). **<sup>13</sup>C NMR** (100 MHz, CDCl<sub>3</sub>) δ 158.9, 148.4, 137.0, 133.7, 130.7, 126.1, 122.1, 116.6, 115.7, 106.7, 43.4, 39.2, 23.1, 11.5. **HRMS** (EI-TOF) *m/z*: [M]<sup>+</sup> calcd for C<sub>14</sub>H<sub>15</sub><sup>35</sup>ClN<sub>2</sub>O<sub>3</sub>: 294.0766, found: 294.0768; C<sub>14</sub>H<sub>15</sub><sup>37</sup>ClN<sub>2</sub>O<sub>3</sub>: 296.0737; found: 296.0735, [α]<sub>D</sub><sup>25</sup> = +10.7 (*c* 0.20, CH<sub>2</sub>Cl<sub>2</sub>); **HPLC** (Chiralpak AS-H, *n*-hexane/ethanol = 80/20, flow rate = 1.0 mL/min, λ = 220 nm) *t*<sub>R</sub> = 7.017 min (minor), 12.371 min (major).

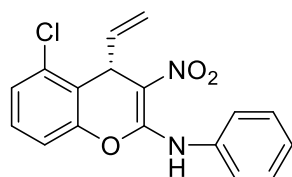

**(S)-5-Chloro-3-nitro-N-phenyl-4-vinyl-4H-chromen-2-amine (51):** Following the general procedure A, compound **51** was obtained as a yellow solid in 84% yield (27.7 mg), 99% ee;  $R_f = 0.6$  ( $\text{CH}_2\text{Cl}_2$ ); m.p: 146 – 148 °C;  $^1\text{H NMR}$  (400 MHz,  $\text{CDCl}_3$ )  $\delta$  12.09 (brs, 1H), 7.48 – 7.39 (m, 4H), 7.34 – 7.24 (m, 3H), 7.02 (d,  $J = 8.0$  Hz, 1H), 5.98 (ddd,  $J = 16.6, 10.1, 5.9$  Hz, 1H), 5.30 (d,  $J = 5.8$  Hz, 1H), 5.15 (d,  $J = 10.0$  Hz, 1H), 5.01 (d,  $J = 17.1$  Hz, 1H).  $^{13}\text{C NMR}$  (100 MHz,  $\text{CDCl}_3$ )  $\delta$  156.8, 149.4, 135.0, 134.3, 134.1, 129.6(2C), 128.9, 127.0, 126.8, 123.4(2C), 122.7, 116.3, 115.0, 108.4, 37.4. **HRMS** (EI-TOF)  $m/z$ :  $[\text{M}]^+$  calcd for  $\text{C}_{17}\text{H}_{13}^{35}\text{ClN}_2\text{O}_3$ : 328.0610, found: 328.0620;  $\text{C}_{17}\text{H}_{13}^{37}\text{ClN}_2\text{O}_3$ : 330.0580, found: 330.0588;  $[\alpha]_{\text{D}}^{25} = +29.2$  ( $c$  0.20,  $\text{CH}_2\text{Cl}_2$ ); **HPLC** (Chiralpak AS-H,  $n$ -hexane/ethanol = 80/20, flow rate = 1.0 mL/min,  $\lambda = 220$  nm)  $t_{\text{R}} = 8.431$  min (minor), 11.118 min (major).

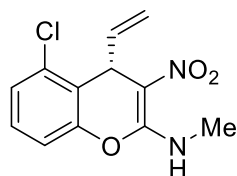

**(S)-5-Chloro-N-methyl-3-nitro-4-vinyl-4H-chromen-2-amine (52):** Following the general procedure A, compound **52** was obtained as a yellow solid in 92% yield (24.5mg), 92% ee;  $R_f = 0.3$  (petroleum ether/ethyl acetate = 4/1); m.p: 156 – 158 °C;  $^1\text{H NMR}$  (400 MHz,  $\text{CDCl}_3$ )  $\delta$  10.34 (brs, 1H), 7.30 – 7.24 (m, 2H), 7.08 (dd,  $J = 7.4, 1.9$  Hz, 1H), 5.95 (ddd,  $J = 17.1, 10.0, 5.8$  Hz, 1H), 5.22 (d,  $J = 5.8$  Hz, 1H), 5.10 (d,  $J = 10.0$  Hz, 1H), 4.93 (d,  $J = 17.1$  Hz, 1H), 3.23 (d,  $J = 5.2$  Hz, 3H).  $^{13}\text{C NMR}$  (100 MHz,  $\text{CDCl}_3$ )  $\delta$  159.8, 149.4, 134.4, 134.1, 128.8, 126.8, 122.7, 115.8, 114.9, 107.3, 37.3, 28.1. **HRMS** (EI-TOF)  $m/z$ :  $[\text{M}]^+$  calcd for  $\text{C}_{12}\text{H}_{11}^{35}\text{ClN}_2\text{O}_3$ : 266.0453, found: 266.0461;  $\text{C}_{12}\text{H}_{11}^{37}\text{ClN}_2\text{O}_3$ : 268.0424, found: 268.0432;  $[\alpha]_{\text{D}}^{25} = +23.9$  ( $c$  0.20,  $\text{CH}_2\text{Cl}_2$ ); **HPLC** (Chiralpak AS-H,  $n$ -hexane/ethanol = 80/20, flow rate = 1.0 mL/min,  $\lambda = 220$  nm)  $t_{\text{R}} = 10.575$  min (minor), 36.027 min (major).

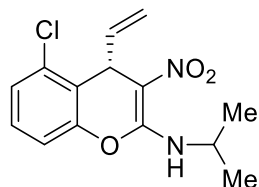

**(S)-5-Chloro-N-isopropyl-3-nitro-4-vinyl-4H-chromen-2-amine (53):** Following the general procedure A, compound **53** was obtained as a yellow solid in 74% yield (21.8mg), 57% ee;  $R_f = 0.4$  (petroleum ether/ethyl acetate = 4/1); m.p: 100 – 102 °C;  $^1\text{H NMR}$  (400 MHz,  $\text{CDCl}_3$ )  $\delta$  10.30 (brs, 1H), 7.28 (d,  $J = 7.2$  Hz, 1H), 7.23 (d,  $J = 8.0$  Hz, 1H), 7.05 (dd,  $J = 7.8, 1.7$  Hz, 1H), 5.95 (ddd,  $J = 16.6, 10.0, 5.8$  Hz, 1H), 5.24 (d,  $J = 5.8$  Hz, 1H), 5.10 (d,  $J = 10.0$  Hz, 1H), 4.93 (d,  $J = 18.1$  Hz, 1H), 4.32 – 4.24 (m, 1H), 1.41 (d,  $J = 6.6$  Hz, 3H), 1.37 (d,  $J = 6.5$  Hz, 3H).  $^{13}\text{C NMR}$  (100 MHz,  $\text{CDCl}_3$ )  $\delta$  158.6, 149.6, 134.4, 134.2, 128.8, 126.8, 122.9, 115.8,

114.8, 107.0, 44.7, 37.4, 23.5, 23.3. **HRMS** (EI-TOF)  $m/z$ :  $[M]^+$  calcd for  $C_{14}H_{15}^{35}ClN_2O_3$ : 294.0766, found: 294.0770;  $C_{14}H_{15}^{37}ClN_2O_3$ : 296.0737, found: 294.0738;  $[\alpha]_D^{25} = +13.9$  ( $c$  0.20,  $CH_2Cl_2$ ); **HPLC** (Chiralpak AS-H,  $n$ -hexane/ethanol = 80/20, flow rate = 1.0 mL/min,  $\lambda = 220$  nm)  $t_R = 5.864$  min (minor), 15.092 min (major).

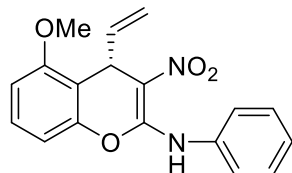

**(S)-5-Methoxy-3-nitro-N-phenyl-4-vinyl-4H-chromen-2-amine (54)**: Following the general procedure A, compound **54** was obtained as a yellow solid in 80% yield (25.8 mg), 72% ee;  $R_f = 0.5$  ( $CH_2Cl_2$ ); m.p: 157 – 159 °C;  **$^1H$  NMR** (400 MHz,  $CDCl_3$ )  $\delta$  12.25 (brs, 1H), 7.43 (d,  $J = 5.8$  Hz, 4H), 7.34 – 7.19 (m, 2H), 6.72 (dd,  $J = 13.3, 8.3$  Hz, 2H), 6.02 (ddd,  $J = 17.1, 10.0, 5.6$  Hz, 1H), 5.23 (d,  $J = 5.7$  Hz, 1H), 5.05 (d,  $J = 10.0$  Hz, 1H), 4.97 (d,  $J = 17.1$  Hz, 1H), 3.88 (s, 3H).  **$^{13}C$  NMR** (100 MHz,  $CDCl_3$ )  $\delta$  157.2, 157.1, 149.1, 135.8, 135.3, 129.5(2C), 128.7, 126.5, 123.2(2C), 114.7, 112.9, 108.8, 108.5, 107.7, 56.1, 34.3. **HRMS** (EI-TOF)  $m/z$ :  $[M]^+$  calcd for  $C_{18}H_{16}N_2O_4$ : 324.1105, found: 324.1111;  $[\alpha]_D^{25} = +26.9$  ( $c$  0.20,  $CH_2Cl_2$ ); **HPLC** (Chiralpak AS-H,  $n$ -hexane/ethanol = 80/20, flow rate = 1.0 mL/min,  $\lambda = 220$  nm)  $t_R = 10.010$  min (minor), 10.624 min (major).

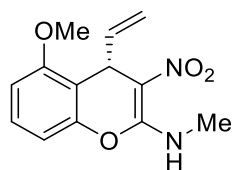

**(S)-5-Methoxy-N-methyl-3-nitro-4-vinyl-4H-chromen-2-amine (55)**: Following the general procedure A, compound **55** was obtained as a yellow solid in 61% yield (15.9mg), 70% ee;  $R_f = 0.3$  (petroleum ether/ethyl acetate = 4/1); m.p: 149 – 151 °C;  **$^1H$  NMR** (400 MHz,  $CDCl_3$ )  $\delta$  10.46 (brs, 1H), 7.28 – 7.19 (m, 1H), 6.76 – 6.71 (m, 2H), 5.99 (ddd,  $J = 17.2, 10.0, 5.5$  Hz, 1H), 5.17 (d,  $J = 5.5$  Hz, 1H), 5.00 (d,  $J = 10.1$  Hz, 1H), 4.89 (d,  $J = 17.1$  Hz, 1H), 3.86 (s, 3H), 3.21 (d,  $J = 5.2$  Hz, 3H).  **$^{13}C$  NMR** (100 MHz,  $CDCl_3$ )  $\delta$  160.3, 157.1, 149.2, 136.0, 128.6, 114.3, 113.1, 108.4, 107.8, 107.5, 56.1, 34.3, 28.0. **HRMS** (EI-TOF)  $m/z$ :  $[M]^+$  calcd for  $C_{13}H_{14}N_2O_4$ : 262.0948, found: 262.0956;  $[\alpha]_D^{25} = +41.4$  ( $c$  0.20,  $CH_2Cl_2$ ); **HPLC** (Chiralpak IC-H,  $n$ -hexane/ethanol = 80/20, flow rate = 1.0 mL/min,  $\lambda = 220$  nm)  $t_R = 27.667$  min (major), 42.084 min (minor).

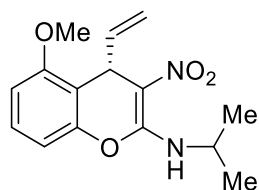

**(S)-N-Isopropyl-5-methoxy-3-nitro-4-vinyl-4H-chromen-2-amine (56)**: Following the general procedure A, compound **56** was obtained as a yellow solid in 77% yield (22.3mg), 90%

ee;  $R_f = 0.4$  (petroleum ether/ethyl acetate = 4/1); m.p: 102 – 104 °C;  $^1\text{H NMR}$  (400 MHz,  $\text{CDCl}_3$ )  $\delta$  10.43 (brs, 1H), 7.25 – 7.21 (m, 1H), 6.73 (d,  $J = 8.2$  Hz, 2H), 5.98 (ddd,  $J = 17.4, 10.1, 5.6$  Hz, 1H), 5.17 (d,  $J = 5.5$  Hz, 1H), 5.00 (d,  $J = 10.1$  Hz, 1H), 4.89 (d,  $J = 17.2$  Hz, 1H), 4.35 – 4.20 (m, 1H), 3.86 (s, 3H), 1.40 (d,  $J = 6.5$  Hz, 3H), 1.37 (d,  $J = 6.5$  Hz, 3H).  $^{13}\text{C NMR}$  (100 MHz,  $\text{CDCl}_3$ )  $\delta$  159.0, 157.1, 149.3, 135.9, 128.6, 114.2, 113.2, 108.3, 107.4, 107.4, 56.1, 44.5, 34.3, 23.4, 23.2. **HRMS** (EI-TOF)  $m/z$ :  $[\text{M}]^+$  calcd for  $\text{C}_{15}\text{H}_{18}\text{N}_2\text{O}_4$ : 290.1261, found: 290.1265;  $[\alpha]_{\text{D}}^{25} = +19.2$  ( $c$  0.20,  $\text{CH}_2\text{Cl}_2$ ); **HPLC** (Chiralpak AS-H,  $n$ -hexane/ethanol = 80/20, flow rate = 1.0 mL/min,  $\lambda = 220$  nm)  $t_{\text{R}} = 6.278$  min (minor), 8.570 min (major).

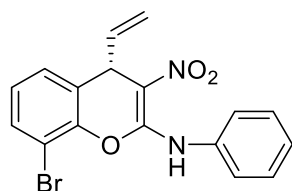

**(S)-8-Bromo-3-nitro-N-phenyl-4-vinyl-4H-chromen-2-amine (57)**: Following the general procedure A, compound **57** was obtained as a yellow solid in 96% yield (35.6mg), 97% ee;  $R_f = 0.6$  ( $\text{CH}_2\text{Cl}_2$ ); m.p: 150 – 152 °C;  $^1\text{H NMR}$  (400 MHz,  $\text{CDCl}_3$ )  $\delta$  12.31 (brs, 1H), 7.58 (d,  $J = 7.9$  Hz, 2H), 7.54 – 7.40 (m, 3H), 7.34 – 7.19 (m, 2H), 7.10 – 7.07 (m, 1H), 5.89 (ddd,  $J = 16.7, 10.0, 6.6$  Hz, 1H), 5.13 (d,  $J = 10.8$  Hz, 1H), 5.08 (d,  $J = 17.6$  Hz, 1H), 5.03 (d,  $J = 6.6$  Hz, 1H).  $^{13}\text{C NMR}$  (100 MHz,  $\text{CDCl}_3$ )  $\delta$  156.5, 145.5, 136.9, 134.7, 132.6, 129.4(2C), 128.8, 126.9, 126.8, 125.3, 123.9(2C), 116.2, 110.1, 107.9, 39.9. **HRMS** (EI-TOF)  $m/z$ :  $[\text{M}]^+$  calcd for  $\text{C}_{17}\text{H}_{13}^{79}\text{BrN}_2\text{O}_3$ : 372.0105, found: 372.0108;  $\text{C}_{17}\text{H}_{13}^{81}\text{BrN}_2\text{O}_3$ : 374.0084, found: 372.0093;  $[\alpha]_{\text{D}}^{25} = +18.0$  ( $c$  0.20,  $\text{CH}_2\text{Cl}_2$ ); **HPLC** (Chiralpak AS-H,  $n$ -hexane/ethanol = 80/20, flow rate = 1.0 mL/min,  $\lambda = 220$  nm)  $t_{\text{R}} = 8.177$  min (minor), 15.913 min (major).

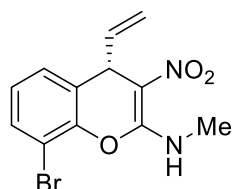

**(S)-8-Bromo-N-methyl-3-nitro-4-vinyl-4H-chromen-2-amine (58)**: Following the general procedure A, compound **58** was obtained as a yellow solid in 97% yield (29.9mg), 61% ee;  $R_f = 0.4$  (petroleum ether/ethyl acetate = 4/1); m.p: 135 – 137 °C;  $^1\text{H NMR}$  (400 MHz,  $\text{CDCl}_3$ )  $\delta$  10.28 (brs, 1H), 7.50 (d,  $J = 7.9$  Hz, 1H), 7.21 (d,  $J = 7.6$  Hz, 1H), 7.08 (dd,  $J = 8.0$  Hz, 8.0 Hz, 1H), 5.86 (ddd,  $J = 16.8, 10.0, 6.4$  Hz, 1H), 5.07 (d,  $J = 10.2$  Hz, 1H), 5.01 (d,  $J = 17.7$  Hz, 1H), 4.96 (d,  $J = 7.0$  Hz, 1H), 3.31 (d,  $J = 5.2$  Hz, 3H).  $^{13}\text{C NMR}$  (100 MHz,  $\text{CDCl}_3$ )  $\delta$  159.5, 145.1, 136.9, 132.1, 128.7, 126.5, 125.4, 115.7, 110.3, 106.9, 39.9, 28.5. **HRMS** (EI-TOF)  $m/z$ :  $[\text{M}]^+$  calcd for  $\text{C}_{12}\text{H}_{11}^{79}\text{BrN}_2\text{O}_3$ : 309.9948, found: 309.9950;  $\text{C}_{12}\text{H}_{11}^{81}\text{BrN}_2\text{O}_3$ : 311.9928, found: 311.9937;  $[\alpha]_{\text{D}}^{25} = +14.6$  ( $c$  0.20,  $\text{CH}_2\text{Cl}_2$ ); **HPLC** (Chiralpak AS-H,  $n$ -hexane/ethanol = 80/20, flow rate = 1.0 mL/min,  $\lambda = 220$  nm)  $t_{\text{R}} = 11.440$  min (minor), 43.566 min (major).



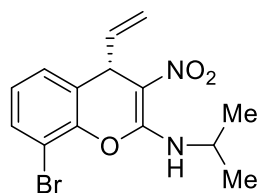

**(S)-8-Bromo-N-isopropyl-3-nitro-4-vinyl-4H-chromen-2-amine (59):** Following the general procedure A, compound **59** was obtained as a yellow solid in 86% yield (29.1mg), 59% ee;  $R_f = 0.4$  (petroleum ether/ethyl acetate = 4/1); m.p: 149 – 151 °C;  $^1\text{H NMR}$  (400 MHz,  $\text{CDCl}_3$ )  $\delta$  10.24 (brs, 1H), 7.50 (d,  $J = 6.4$  Hz, 1H), 7.21 (d,  $J = 5.7$  Hz, 1H), 7.10 – 7.06 (m, 1H), 5.86 (ddd,  $J = 16.7, 10.0, 6.4$  Hz, 1H), 5.07 (d,  $J = 10.0$  Hz, 1H), 5.01 (d,  $J = 16.9$  Hz, 1H), 4.97 (d,  $J = 6.4$  Hz, 1H), 4.48 – 4.40 (m, 1H), 1.44 (d,  $J = 6.6$  Hz, 3H), 1.42 (d,  $J = 6.5$  Hz, 3H).  $^{13}\text{C NMR}$  (100 MHz,  $\text{CDCl}_3$ )  $\delta$  158.2, 145.3, 136.9, 132.1, 128.8, 126.5, 125.5, 115.7, 110.3, 106.5, 45.1, 39.9, 23.3, 23.1. **HRMS** (EI-TOF)  $m/z$ :  $[\text{M}]^+$  calcd for  $\text{C}_{14}\text{H}_{15}^{79}\text{BrN}_2\text{O}_3$ : 338.0261, found: 338.0265;  $\text{C}_{14}\text{H}_{15}^{81}\text{BrN}_2\text{O}_3$ : 340.0241, found: 340.0247;  $[\alpha]_{\text{D}}^{25} = +8.3$  ( $c$  0.20,  $\text{CH}_2\text{Cl}_2$ ); **HPLC** (Chiralpak AS-H,  $n$ -hexane/ethanol = 80/20, flow rate = 1.0 mL/min,  $\lambda = 220$  nm)  $t_{\text{R}} = 5.785$  min (minor), 15.419 min (major).

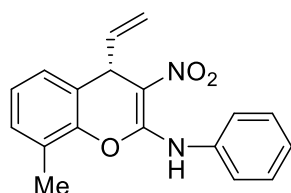

**(S)-8-Methyl-3-nitro-N-phenyl-4-vinyl-4H-chromen-2-amine (60):** Following the general procedure A, compound **60** was obtained as a yellow solid in 90% yield (27.6mg), 99% ee;  $R_f = 0.6$  ( $\text{CH}_2\text{Cl}_2$ ); m.p: 109 – 111 °C;  $^1\text{H NMR}$  (400 MHz,  $\text{CDCl}_3$ )  $\delta$  12.25 (brs, 1H), 7.48 – 7.42 (m, 4H), 7.33 – 7.30 (m, 1H), 7.12 – 7.07 (m, 3H), 5.92 (ddd,  $J = 16.7, 9.5, 6.6$  Hz, 1H), 5.09 (d,  $J = 7.2$  Hz, 1H), 5.04 (d,  $J = 16.0$  Hz, 1H), 5.00 (d,  $J = 4.2$  Hz, 1H), 2.17 (s, 3H).  $^{13}\text{C NMR}$  (100 MHz,  $\text{CDCl}_3$ )  $\delta$  157.2, 146.9, 137.4, 135.0, 130.1, 129.4(2C), 127.2, 126.9, 125.8, 125.7, 124.1(2C), 123.1, 115.6, 108.2, 39.7, 16.3. **HRMS** (EI-TOF)  $m/z$ :  $[\text{M}]^+$  calcd for  $\text{C}_{18}\text{H}_{16}\text{N}_2\text{O}_3$ : 308.1155, found: 308.1160;  $[\alpha]_{\text{D}}^{25} = +15.2$  ( $c$  0.20,  $\text{CH}_2\text{Cl}_2$ ); **HPLC** (Chiralpak AS-H,  $n$ -hexane/ethanol = 80/20, flow rate = 1.0 mL/min,  $\lambda = 220$  nm)  $t_{\text{R}} = 8.088$  min (minor), 23.630 min (major).

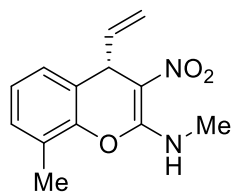

**(S)-N,8-Dimethyl-3-nitro-4-vinyl-4H-chromen-2-amine (61):** Following the general procedure A, compound **61** was obtained as a yellow solid in 90% yield (22.1mg), 62% ee;  $R_f = 0.4$  (petroleum ether/ethyl acetate = 4/1); m.p: 136 – 138 °C;  $^1\text{H NMR}$  (400 MHz,  $\text{CDCl}_3$ )  $\delta$  10.43 (brs, 1H), 7.16 – 7.05 (m, 3H), 5.86 (ddd,  $J = 16.7, 10.0, 6.4$  Hz, 1H), 5.03 (d,  $J = 10.0$  Hz, 1H), 4.98 (d,  $J = 16.8$  Hz, 1H), 4.92 (d,  $J = 6.4$  Hz, 1H), 3.24 (d,  $J = 5.2$  Hz, 3H), 2.37 (s, 3H).  $^{13}\text{C NMR}$  (100 MHz,  $\text{CDCl}_3$ )  $\delta$  159.9, 146.7, 137.4, 129.9, 127.2, 125.6, 125.4, 123.1,

115.1, 107.3, 39.7, 28.0, 15.9. **HRMS** (EI-TOF)  $m/z$ :  $[M]^+$  calcd for  $C_{13}H_{14}N_2O_3$ : 246.0999, found: 246.1002;  $[\alpha]_D^{25} = +28.7$  ( $c$  0.20,  $CH_2Cl_2$ ); **HPLC** (Chiralpak IC-H,  $n$ -hexane/ethanol = 80/20, flow rate = 1.0 mL/min,  $\lambda = 220$  nm)  $t_R = 27.711$  min (major), 36.674 min (minor).

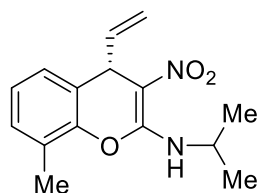

**(S)-N-Isopropyl-8-methyl-3-nitro-4-vinyl-4H-chromen-2-amine (62)**: Following the general procedure A, compound **62** was obtained as a yellow solid in 90% yield (24.7mg), 55% ee;  $R_f = 0.4$  (petroleum ether/ethyl acetate = 4/1); m.p: 132 – 134 °C;  **$^1H$  NMR** (400 MHz,  $CDCl_3$ )  $\delta$  10.43 (brs, 1H), 7.15 – 7.06 (m, 3H), 5.87 (ddd,  $J = 16.6, 10.0, 6.4$  Hz, 1H), 5.04 (d,  $J = 9.9$  Hz, 1H), 4.99 (d,  $J = 16.9$  Hz, 1H), 4.93 (d,  $J = 6.3$  Hz, 1H), 4.36 – 4.23 (m, 1H), 2.37 (s, 3H), 1.43 (d,  $J = 6.5$  Hz, 3H), 1.40 (d,  $J = 6.5$  Hz, 3H).  **$^{13}C$  NMR** (100 MHz,  $CDCl_3$ )  $\delta$  158.5, 146.7, 137.4, 129.9, 127.2, 125.5, 125.3, 123.2, 115.1, 106.8, 44.6, 39.7, 23.2, 23.1, 15.9. **HRMS** (EI-TOF)  $m/z$ :  $[M]^+$  calcd for  $C_{15}H_{18}N_2O_3$ : 274.1312, found: 274.1320;  $[\alpha]_D^{25} = +5.8$  ( $c$  0.20,  $CH_2Cl_2$ ); **HPLC** (Chiralpak AS-H,  $n$ -hexane/ethanol = 80/20, flow rate = 1.0 mL/min,  $\lambda = 220$  nm)  $t_R = 5.749$  min (minor), 68.704 min (major).

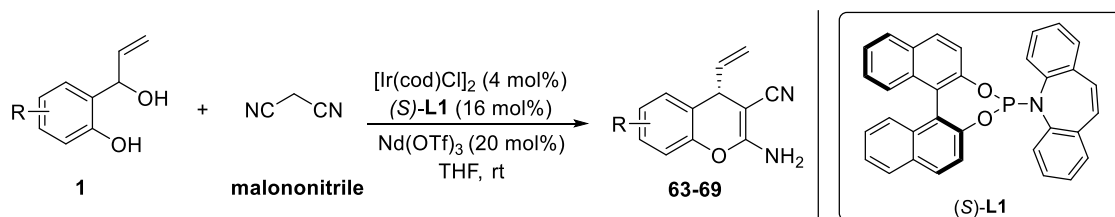

**General procedure B**: Under a nitrogen atmosphere, a flame dried 10 mL Schlenk tube was charged with  $[Ir(cod)Cl]_2$  (2.7 mg, 0.004 mmol, 4 mol%), Carreira's ligand (*S*)-**L1** (8.2 mg, 0.016 mmol, 16 mol%). After the tube was evacuated and backfilled with nitrogen, freshly distilled THF (1.5 mL) was added, then stirred at room temperature for 15 minutes while the solution turned dark red. Then, 2-(1-hydroxyallyl)phenols ( $\pm$ )-**1** (0.2 mmol, 2.0 equiv) were added and the reaction mixture immediately turned light yellow. Malononitrile (6.6 mg, 0.1 mmol, 1.0 equiv) and  $Nd(OTf)_3$  (13.9 mg, 0.02 mmol, 20 mol%) were added sequentially. The reaction mixture was stirred at room temperature until **1** were consumed (monitored by TLC), which was directly purified by flash column chromatography silica gel (petroleum ether/ethyl acetate = 4/1) to afford products **63-69**.

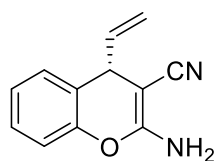

**(S)-2-Amino-4-vinyl-4H-chromene-3-carbonitrile (63)**: Following the general procedure B, compound **63** was obtained as a yellow solid in 73% yield (14.5 mg), 88% ee;  $R_f = 0.3$  (petroleum ether/ethyl acetate = 4/1); m.p: 104 – 106 °C;  **$^1H$  NMR** (400 MHz,  $CDCl_3$ )  $\delta$  7.23

– 7.09 (m, 3H), 6.95 (d,  $J = 8.1$  Hz, 1H), 5.78 (ddd,  $J = 17.6, 9.1, 8.3$  Hz, 1H), 5.22 (d,  $J = 16.9$  Hz, 1H), 5.13 (d,  $J = 9.8$  Hz, 1H), 4.69 (brs, 2H), 4.13 (d,  $J = 8.3$  Hz, 1H).  $^{13}\text{C}$  NMR (100 MHz,  $\text{CDCl}_3$ )  $\delta$  159.7, 148.5, 139.7, 129.4, 128.5, 125.0, 121.4, 120.1, 116.5, 115.9, 58.2, 39.5. **HRMS** (EI-TOF)  $m/z$ :  $[\text{M}]^+$  calcd for  $\text{C}_{12}\text{H}_{10}\text{N}_2\text{O}$ : 198.0788, found: 198.0791;  $[\alpha]_{\text{D}}^{25} = -0.6$  ( $c$  0.20,  $\text{CH}_2\text{Cl}_2$ ); **HPLC** (Chiralpak AS-H,  $n$ -hexane/ethanol = 80/20, flow rate = 1.0 mL/min,  $\lambda = 220$  nm)  $t_{\text{R}} = 6.609$  min (minor), 7.547 min (major).

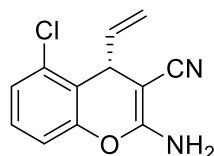

**(R)-2-Amino-5-chloro-4-vinyl-4H-chromene-3-carbonitrile (64)**: Following the general procedure **B**, compound **64** was obtained as a white solid in 40% yield (9.3 mg), 89% ee;  $R_{\text{f}} = 0.3$  (petroleum ether/ethyl acetate = 4/1); m.p: 123 – 125 °C;  $^1\text{H}$  NMR (400 MHz,  $\text{CDCl}_3$ )  $\delta$  7.23 – 7.13 (m, 2H), 6.92 (dd,  $J = 6.7, 2.7$  Hz, 1H), 5.83 (ddd,  $J = 16.8, 9.9, 6.7$  Hz, 1H), 5.16 (d,  $J = 16.8$  Hz, 1H), 5.13 (d,  $J = 10.4$  Hz, 1H), 4.69 (brs, 2H), 4.32 (d,  $J = 6.4$  Hz, 1H).  $^{13}\text{C}$  NMR (100 MHz,  $\text{CDCl}_3$ )  $\delta$  160.1, 150.1, 136.9, 133.9, 128.7, 126.2, 121.3, 119.5, 115.9, 115.3, 58.7, 37.5. **HRMS** (EI-TOF)  $m/z$ :  $[\text{M}]^+$  calcd for  $\text{C}_{12}\text{H}_9^{35}\text{ClN}_2\text{O}$ : 232.0398, found: 232.0404;  $\text{C}_{12}\text{H}_9^{37}\text{ClN}_2\text{O}$ : 234.0369, found: 234.0372;  $[\alpha]_{\text{D}}^{25} = -3.2$  ( $c$  0.20,  $\text{CH}_2\text{Cl}_2$ ); **HPLC** (Chiralpak AS-H,  $n$ -hexane/ethanol = 80/20, flow rate = 1.0 mL/min,  $\lambda = 220$  nm)  $t_{\text{R}} = 5.788$  min (major), 8.816 min (minor).

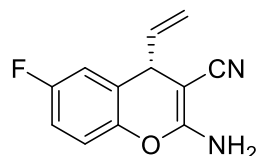

**(S)-2-Amino-6-fluoro-4-vinyl-4H-chromene-3-carbonitrile (65)**: Following the general procedure **B**, compound **65** was obtained as a yellow solid in 66% yield (15.3 mg), 71% ee;  $R_{\text{f}} = 0.3$  (petroleum ether/ethyl acetate = 4/1); m.p: 141 – 143 °C;  $^1\text{H}$  NMR (400 MHz,  $\text{CDCl}_3$ )  $\delta$  6.98 – 6.87 (m, 2H), 6.86 (d,  $J = 7.8$  Hz, 1H), 5.76 (ddd,  $J = 16.8, 9.6, 8.3$  Hz, 1H), 5.25 (d,  $J = 16.8$  Hz, 1H), 5.18 (d,  $J = 9.7$  Hz, 1H), 4.61 (brs, 2H), 4.12 (d,  $J = 8.4$  Hz, 1H).  $^{13}\text{C}$  NMR (100 MHz,  $\text{CDCl}_3$ )  $\delta$  159.5, 159.4 (d,  $^1J_{\text{C-F}} = 242.3$  Hz), 144.6, 138.9, 123.2 (d,  $^3J_{\text{C-F}} = 7.8$  Hz), 119.7, 117.9 (d,  $^3J_{\text{C-F}} = 8.6$  Hz), 116.8, 115.5 (d,  $^2J_{\text{C-F}} = 23.6$  Hz), 115.4 (d,  $^2J_{\text{C-F}} = 23.8$  Hz), 57.9, 39.8.  $^{19}\text{F}$  NMR (376 MHz,  $\text{CDCl}_3$ )  $\delta$  -117.32 – -117.41 (m). **HRMS** (EI-TOF)  $m/z$ :  $[\text{M}]^+$  calcd for  $\text{C}_{12}\text{H}_9\text{FN}_2\text{O}$ : 216.0693, found: 216.0697;  $[\alpha]_{\text{D}}^{25} = -1.8$  ( $c$  0.20,  $\text{CH}_2\text{Cl}_2$ ); **HPLC** (Chiralpak AS-H,  $n$ -hexane/ethanol = 80/20, flow rate = 1.0 mL/min,  $\lambda = 220$  nm)  $t_{\text{R}} = 6.630$  min (minor), 7.438 min (major).

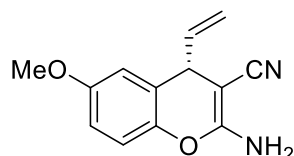

**(S)-2-Amino-6-methoxy-4-vinyl-4H-chromene-3-carbonitrile (66)**: Following the general procedure **B**, compound **66** was obtained as a yellow solid in 70% yield (15.9 mg), 90% ee;  $R_{\text{f}}$

= 0.3 (petroleum ether/ethyl acetate = 4/1); m.p: 167 – 169 °C; <sup>1</sup>H NMR (400 MHz, CDCl<sub>3</sub>) δ 6.89 (d, *J* = 8.9 Hz, 1H), 6.76 (dd, *J* = 8.9, 3.0 Hz, 1H), 6.64 (d, *J* = 2.9 Hz, 1H), 5.77 (ddd, *J* = 16.8, 9.8, 8.4 Hz, 1H), 5.24 (d, *J* = 16.8 Hz, 1H), 5.15 (d, *J* = 10.0 Hz, 1H), 4.57 (brs, 2H), 4.11 (d, *J* = 8.4 Hz, 1H), 3.77 (s, 3H). <sup>13</sup>C NMR (100 MHz, CDCl<sub>3</sub>) δ 159.8, 156.6, 142.6, 139.5, 122.2, 120.2, 117.4, 116.1, 114.4, 113.4, 57.9, 55.8, 39.9. HRMS (EI-TOF) m/z: [M]<sup>+</sup> calcd for C<sub>13</sub>H<sub>12</sub>N<sub>2</sub>O<sub>2</sub>: 228.0899, found: 228.0896; [α]<sub>D</sub><sup>25</sup> = -2.7 (*c* 0.20, CH<sub>2</sub>Cl<sub>2</sub>); HPLC (Chiralpak AD-H, *n*-hexane/ethanol = 80/20, flow rate = 1.0 mL/min, λ = 220 nm) t<sub>R</sub> = 9.352 min (minor), 14.632 min (major).

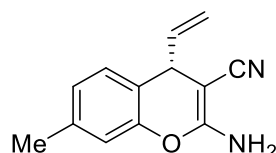

**(S)-2-Amino-7-methyl-4-vinyl-4H-chromene-3-carbonitrile (67):** Following the general procedure B, compound 67 was obtained as a white solid in 54% yield (11.4 mg), 96% ee; R<sub>f</sub> = 0.3 (petroleum ether/ethyl acetate = 4/1); m.p: 140 – 142 °C; <sup>1</sup>H NMR (400 MHz, CDCl<sub>3</sub>) δ 7.03 (d, *J* = 7.8 Hz, 1H), 6.93 (dd, *J* = 7.8, 1.7 Hz, 1H), 6.77 (s, 1H), 5.75 (ddd, *J* = 16.8, 9.7, 8.3 Hz, 1H), 5.21 (d, *J* = 16.8 Hz, 1H), 5.12 (d, *J* = 9.7 Hz, 1H), 4.57 (brs, 2H), 4.10 (d, *J* = 8.3 Hz, 1H), 2.32 (s, 3H). <sup>13</sup>C NMR (100 MHz, CDCl<sub>3</sub>) δ 159.6, 148.4, 139.8, 138.8, 129.1, 125.9, 120.1, 118.3, 116.8, 115.8, 58.6, 39.3, 21.1. HRMS (EI-TOF) m/z: [M]<sup>+</sup> calcd for C<sub>13</sub>H<sub>12</sub>N<sub>2</sub>O: 212.0944, found: 212.0948; [α]<sub>D</sub><sup>25</sup> = -3.1 (*c* 0.20, CH<sub>2</sub>Cl<sub>2</sub>); HPLC (Chiralpak AD-H, *n*-hexane/ethanol = 80/20, flow rate = 1.0 mL/min, λ = 220 nm) t<sub>R</sub> = 7.529 min (minor), 12.306 min (major).

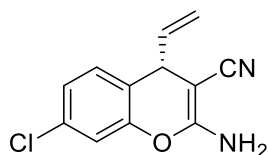

**(S)-2-Amino-7-chloro-4-vinyl-4H-chromene-3-carbonitrile (68):** Following the general procedure B, compound 68 was obtained as a white solid in 59% yield (13.7 mg), 97% ee; R<sub>f</sub> = 0.3 (petroleum ether/ethyl acetate = 4/1); m.p: 125 – 127 °C; <sup>1</sup>H NMR (400 MHz, CDCl<sub>3</sub>) δ 7.09 (d, *J* = 1.5 Hz, 2H), 6.98 (s, 1H), 5.74 (ddd, *J* = 16.8, 9.8, 8.3 Hz, 1H), 5.23 (d, *J* = 16.8 Hz, 1H), 5.16 (d, *J* = 9.8 Hz, 1H), 4.66 (brs, 2H), 4.10 (d, *J* = 8.3 Hz, 1H). <sup>13</sup>C NMR (100 MHz, CDCl<sub>3</sub>) δ 159.2, 148.9, 139.2, 133.7, 130.4, 125.3, 120.1, 119.6, 116.8, 116.5, 58.6, 39.2. HRMS (EI-TOF) m/z: [M]<sup>+</sup> calcd for C<sub>12</sub>H<sub>9</sub><sup>35</sup>ClN<sub>2</sub>O: 232.0398, found: 232.0404; C<sub>12</sub>H<sub>9</sub><sup>37</sup>ClN<sub>2</sub>O: 234.0369, found: 234.0376; [α]<sub>D</sub><sup>25</sup> = +0.8 (*c* 0.20, CH<sub>2</sub>Cl<sub>2</sub>); HPLC (Chiralpak AS-H, *n*-hexane/ethanol = 80/20, flow rate = 1.0 mL/min, λ = 220 nm) t<sub>R</sub> = 6.026 min (minor), 6.994 min (major).

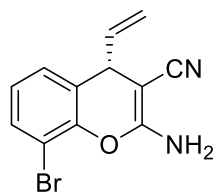

**(S)-2-Amino-8-bromo-4-vinyl-4H-chromene-3-carbonitrile (69):** Following the general procedure **B**, compound **69** was obtained as a yellow solid in 54% yield (12.3 mg), 95% ee;  $R_f = 0.3$  (petroleum ether/ethyl acetate = 4/1); m.p: 157 – 159 °C;  $^1\text{H NMR}$  (400 MHz,  $\text{CDCl}_3$ )  $\delta$  7.45 (dd,  $J = 7.9, 1.6$  Hz, 1H), 7.11 (d,  $J = 7.4$  Hz, 1H), 7.01 – 6.97 (m, 1H), 5.77 (ddd,  $J = 16.8, 9.8, 8.2$  Hz, 1H), 5.23 (d,  $J = 16.8$  Hz, 1H), 5.16 (d,  $J = 9.8$  Hz, 1H), 4.74 (brs, 2H), 4.16 (d,  $J = 8.3$  Hz, 1H).  $^{13}\text{C NMR}$  (100 MHz,  $\text{CDCl}_3$ )  $\delta$  159.3, 145.6, 139.2, 132.4, 128.6, 125.7, 123.5, 119.4, 116.5, 110.5, 58.8, 40.0. **HRMS** (EI-TOF)  $m/z$ :  $[\text{M}]^+$  calcd for  $\text{C}_{12}\text{H}_9^{79}\text{BrN}_2\text{O}$ : 275.9893, found: 275.9901;  $\text{C}_{12}\text{H}_9^{81}\text{BrN}_2\text{O}$ : 277.9873, found: 277.9881;  $[\alpha]_D^{25} = -2.4$  ( $c$  0.20,  $\text{CH}_2\text{Cl}_2$ ); **HPLC** (Chiralpak AD-H,  $n$ -hexane/ethanol = 80/20, flow rate = 1.0 mL/min,  $\lambda = 220$  nm)  $t_R = 7.398$  min (minor), 10.674 min (major).

**The preparation and X-ray analysis of the single crystal:** Compound **69** (95% ee, 10.0 mg) was dissolved in 1.0 mL of acetone in a screw-top vial and drops of hexane were added. The lid was then loosely screwed on the vial, and a single crystal was obtained by natural volatilization at room temperature. The data set was collected by a Bruker APEX-II CCD at 293(2) K equipped with Cu radiation source ( $K\alpha = 1.54178$  Å). Applied with multi-scan absorption correction, the structure solution was solved and refinement was processed by SHELXTL program package. CCDC 2342670 contains the supplementary crystallographic data, and can be obtained free of charge via [www.ccdc.cam.ac.uk/conts/retrieving.html](http://www.ccdc.cam.ac.uk/conts/retrieving.html).

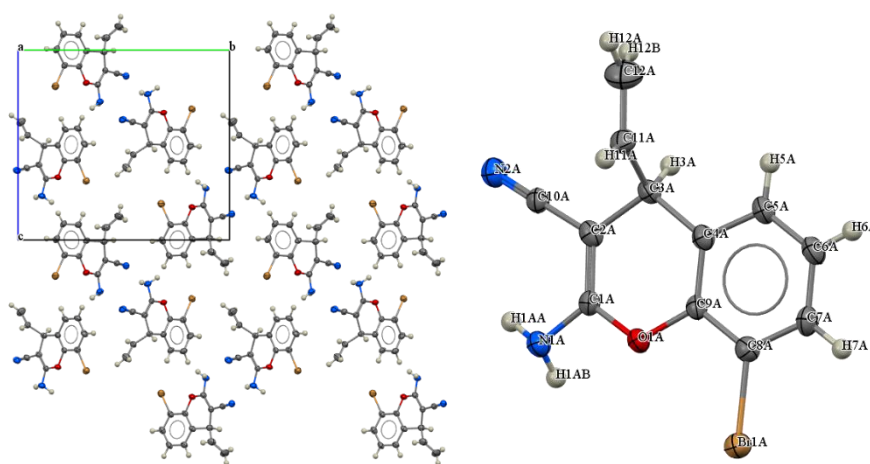

**Figure S2.** The thermal ellipsoid plot for X-ray structure of compound **69** with the ellipsoid contour at 30% probability levels

**Crystal data and structure refinement for 69**

|                      |                                               |                |
|----------------------|-----------------------------------------------|----------------|
| Identification code  | zm_e123_0m                                    |                |
| Empirical formula    | $\text{C}_{12}\text{H}_9\text{BrN}_2\text{O}$ |                |
| Formula weight       | 277.12                                        |                |
| Temperature          | 293.00 K                                      |                |
| Wavelength           | 1.54178 Å                                     |                |
| Crystal system       | Monoclinic                                    |                |
| Space group          | $P 1 2 1 1$                                   |                |
| Unit cell dimensions | $a = 4.9753(2)$ Å                             | $a = 90^\circ$ |

|                                         |                                                                |                       |
|-----------------------------------------|----------------------------------------------------------------|-----------------------|
|                                         | $b = 16.0176(6) \text{ \AA}$                                   | $b = 90.798(2)^\circ$ |
|                                         | $c = 14.3810(5) \text{ \AA}$                                   | $g = 90^\circ$        |
| Volume                                  | 1145.94(7) $\text{\AA}^3$                                      |                       |
| Z                                       | 4                                                              |                       |
| Density (calculated)                    | 1.606 $\text{Mg/m}^3$                                          |                       |
| Absorption coefficient                  | 4.724 $\text{mm}^{-1}$                                         |                       |
| F(000)                                  | 552                                                            |                       |
| Crystal size                            | 0.2 x 0.15 x 0.13 $\text{mm}^3$                                |                       |
| Theta range for data collection         | 3.073 to 68.389 $^\circ$                                       |                       |
| Index ranges                            | -5 $\leq h \leq$ 5, -19 $\leq k \leq$ 19, -17 $\leq l \leq$ 15 |                       |
| Reflections collected                   | 14310                                                          |                       |
| Independent reflections                 | 4023 [R(int) = 0.0910]                                         |                       |
| Completeness to theta = 67.679 $^\circ$ | 99.5 %                                                         |                       |
| Absorption correction                   | Semi-empirical from equivalents                                |                       |
| Max. and min. transmission              | 0.7531 and 0.5321                                              |                       |
| Refinement method                       | Full-matrix least-squares on $F^2$                             |                       |
| Data / restraints / parameters          | 4023 / 2 / 303                                                 |                       |
| Goodness-of-fit on $F^2$                | 0.940                                                          |                       |
| Final R indices [ $I > 2\sigma(I)$ ]    | R1 = 0.0474, wR2 = 0.1241                                      |                       |
| R indices (all data)                    | R1 = 0.0773, wR2 = 0.1295                                      |                       |
| Absolute structure parameter            | 0.12(2)                                                        |                       |
| Extinction coefficient                  | n/a                                                            |                       |
| Largest diff. peak and hole             | 0.483 and -0.685 $\text{e.\AA}^{-3}$                           |                       |

#### 4. Gram-scale preparation of products **47** and **63**

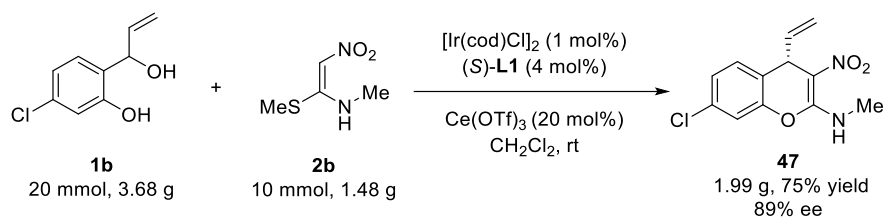

Under a nitrogen atmosphere, a flame dried 100 mL Schlenk tube was charged with  $[\text{Ir}(\text{cod})\text{Cl}]_2$  (67 mg, 0.1 mmol, 1 mol %), Carreira's ligand (*S*)-**L1** (203 mg, 0.4 mmol, 4 mol %). After the tube was evacuated and backfilled with nitrogen, freshly distilled  $\text{CH}_2\text{Cl}_2$  (40 mL) was added, then stirred at room temperature for 15 minutes while the solution turned dark red. Then, 2-(1-hydroxyallyl)phenol **1b** (3.68 g, 20 mmol, 2.0 equiv) were added and the reaction mixture immediately turned light yellow. 1-(methylthio)-2-nitroenamine **2b** (1.48 g, 10 mmol, 1.0 equiv) and  $\text{Ce}(\text{OTf})_3$  (1.17 g, 2 mmol, 20 mol %) were added sequentially. The reaction mixture was stirred at room temperature until **2b** were consumed (monitored by TLC). After the solvent was removed in vacuo, the residue was directly purified by flash column chromatography silica gel (petroleum ether/ethyl acetate = 4/1) to afford product **47** in 75% yield (1.99 g, 89% ee).

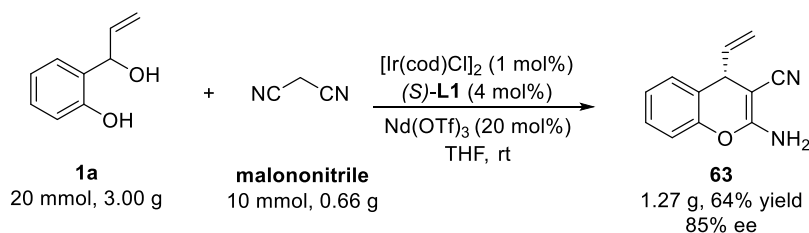

Under a nitrogen atmosphere, a flame dried 100 mL Schlenk tube was charged with  $[\text{Ir}(\text{cod})\text{Cl}]_2$  (67 mg, 0.1 mmol, 1 mol %), Carreira's ligand (*S*)-**L1** (203 mg, 0.4 mmol, 4 mol %). After the tube was evacuated and backfilled with nitrogen, freshly distilled THF (40 mL) was added, then stirred at room temperature for 15 minutes while the solution turned dark red. Then, racemic allylic alcohol **1a** (3.00 g, 20 mmol, 2.0 equiv) were added and the reaction mixture immediately turned light yellow. Malononitrile (0.66 g, 10 mmol, 1.0 equiv) and  $\text{Nd}(\text{OTf})_3$  (1.39 g, 2 mmol, 20 mol %) were added sequentially. The reaction mixture was stirred at room temperature until **1a** were consumed (monitored by TLC). After the solvent was removed in vacuo, the residue was directly purified by flash column chromatography silica gel (petroleum ether/ethyl acetate = 4/1) to afford product **63** in 64% yield (1.27 g, 85% ee).

## 5. Synthetic transformation of product 47

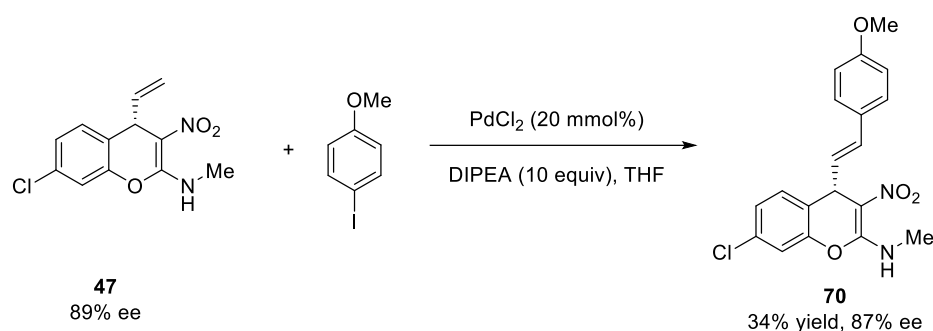

Under a nitrogen atmosphere, a flame dried 10 mL Schlenk tube was charged with compound **47** (53.2 mg, 0.2 mmol, 1.0 equiv), 4-iodobenzyl ether (93.6 mg, 0.4 mmol, 2.0 equiv), DIPEA (258.5 mg, 2 mmol, 10.0 equiv) and PdCl<sub>2</sub> (7.1 mg, 0.04 mmol, 20 mmol%), after the tube was evacuated and backfilled with nitrogen, dry THF (3 mL) was added, then the reaction mixture was stirred at 60 °C for 12 hours. Afterwards, the solvent was removed *in vacuo*, and the crude product was extracted with EtOAc (5 mL) 3-5 times. The combined organics was washed with water and brine, then separated, dried over anhydrous Na<sub>2</sub>SO<sub>4</sub> and evaporated under the reduced pressure. The residue was purified by silica gel column chromatography (petroleum ether/ethyl acetate = 4/1) to give the desired product **70**.

**(S,E)-7-Chloro-4-(4-methoxystyryl)-N-methyl-3-nitro-4H-chromen-2-amine (70)**: yellow solid, 34% yield (25.3 mg), 87% ee;  $R_f = 0.2$  (petroleum ether/ethyl acetate = 4/1); m.p: 136 – 138 °C; <sup>1</sup>H NMR (400 MHz, CDCl<sub>3</sub>) δ 10.40 (brs, 1H), 7.26 – 7.16 (m, 5H), 6.79 (d,  $J = 8.5$  Hz, 2H), 6.29 (d,  $J = 15.7$  Hz, 1H), 6.03 (dd,  $J = 15.7, 7.0$  Hz, 1H), 5.04 (d,  $J = 7.0$  Hz, 1H), 3.77 (s, 3H), 3.22 (d,  $J = 5.2$  Hz, 3H). <sup>13</sup>C NMR (100 MHz, CDCl<sub>3</sub>) δ 159.5, 159.4, 148.5, 133.8, 130.9, 130.5, 129.4, 127.8 (2C), 126.5 (2C), 126.3, 122.5, 116.8, 114.0 (2C), 55.4, 38.6, 28.1. **HRMS** (EI-TOF)  $m/z$ : [M]<sup>+</sup> calcd for C<sub>19</sub>H<sub>17</sub><sup>35</sup>ClN<sub>2</sub>O<sub>4</sub>: 372.0871, found: 372.0881; C<sub>19</sub>H<sub>17</sub><sup>37</sup>ClN<sub>2</sub>O<sub>4</sub>: 374.0847, found: 374.0854; [α]<sub>D</sub><sup>25</sup> = +13.1 (*c* 0.20, CH<sub>2</sub>Cl<sub>2</sub>); **HPLC** (Chiralpak AS-H, *n*-hexane/ethanol = 70/30, flow rate = 1.0 mL/min, λ = 220 nm)  $t_R = 17.555$  min (minor), 40.391 min (major).

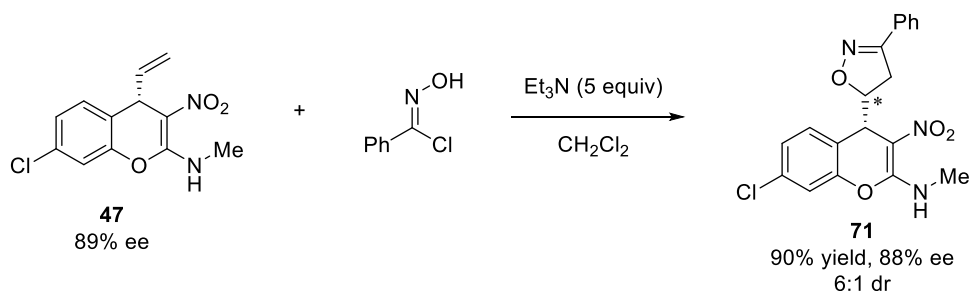

A flame-dried Schlenk tube was charged compound **47** (53.2 mg, 0.2 mmol, 1.0 equiv) and purged with nitrogen. CH<sub>2</sub>Cl<sub>2</sub> (1.0 mL) was added *via* syringe to the reaction tube. A second flame-dried tube was charged with α-chlorobenzaldoxime (155.6 mg, 1.00 mmol, 5.0 equiv.) and CH<sub>2</sub>Cl<sub>2</sub> (2.0 mL) and purged with nitrogen. Triethylamine (139.0 μL, 1.00 mmol, 5.0 equiv.) was added to the second tube, which was stirred 15 minutes at room temperature. The oxime chloride solution was then transferred to the tube containing **47** *via* syringe. The mixture was stirred 12 hours at room temperature. After completion, the reaction mixture was quenched with



water and extracted with CH<sub>2</sub>Cl<sub>2</sub> for three times. The resulted filtrate was separated. The combined organic phase was washed with brine, dried over Na<sub>2</sub>SO<sub>4</sub> and concentrated under reduced pressure. The crude mixture was purified by silica gel column chromatography (petroleum ether/ethyl acetate = 4:1) to give product **71** as a white solid in 90% yield (69.3 mg, 88% ee, 6:1 dr).

**(S)-7-Chloro-N-methyl-3-nitro-4-((S)-3-phenyl-4,5-dihydroisoxazol-5-yl)-4H-chromen-2-amine (71)**: white solid, 90% yield (69.3 mg), 88% ee; R<sub>f</sub> = 0.2 (petroleum ether/ethyl acetate = 4:1); m.p: 124 – 126 °C; <sup>1</sup>H NMR (400 MHz, CDCl<sub>3</sub>) δ 10.37 (brs, 1H), 7.50 – 7.42 (m, 3H), 7.38 – 7.32 (m, 3H), 7.21 – 7.16 (m, 1H), 7.13 (d, *J* = 2.1 Hz, 1H), 5.17 (ddd, *J* = 11.0, 8.1, 3.0 Hz, 1H), 4.90 (d, *J* = 3.0 Hz, 1H), 3.31 – 3.25 (dd, *J* = 11.0, 8.1 Hz, 1H), 3.23 (d, *J* = 5.2 Hz, 3H), 2.94 (dd, *J* = 17.0, 8.1 Hz, 1H). <sup>13</sup>C NMR (100 MHz, CDCl<sub>3</sub>) δ 160.7, 156.9, 149.6, 134.4, 131.3, 130.3, 129.1, 128.8 (2C), 126.7 (2C), 126.4, 119.4, 116.4, 104.3, 82.5, 39.1, 36.9, 28.3. **HRMS** (ESI-TOF) *m/z*: [M+Na]<sup>+</sup> calcd for C<sub>19</sub>H<sub>16</sub><sup>35</sup>ClN<sub>3</sub>O<sub>4</sub>Na: 408.0722, found: 408.0726; C<sub>19</sub>H<sub>16</sub><sup>37</sup>ClN<sub>3</sub>O<sub>4</sub>Na: 410.0693, found: 410.0698; [α]<sub>D</sub><sup>25</sup> = +11.3 (*c* 0.20, CH<sub>2</sub>Cl<sub>2</sub>); **HPLC** (Chiralpak AD-H, *n*-hexane/ethanol = 70/30, flow rate = 1.0 mL/min, λ = 220 nm) t<sub>R</sub> = 18.260 min (minor-1), 21.850 min (major-1), 23.696 min (minor-2), 25.159 min (major-2).

## 6. Antifungal activities evaluation

*In-vitro* antifungal activities of 2-amino-4*H*-chromene compounds against *Fusarium graminearum*, *Botrytis cinerea*, *Rhizoctonia solani* and *Sclerotinia sclerotiorum*, which were provided by GreenTech Laboratory, were tested using the mycelium growth rate method. All compounds were tested at 100 mg/L as well as the positive control reagents boscalid and procymidone. Each compound was dissolved with dimethyl sulfoxide (DMSO) for preparing 1000 mg/L stock solution and diluted with the melted potato dextrose agar (PDA) media to prepared the target concentrations of compounds. A blank control was established by incorporating 0.5% DMSO (v/v) into PDA media. The mycelial disks, with a diameter of 5 mm, from phytopathogenic fungi were placed onto PDA plates and then were incubated at 25 °C under 80% moisturizing conditions in the dark. Diameters (mm) of the colony were measured by the cross-bracketing method. The growth inhibition rates were calculated according to the following formula percentage inhibition (%) = [(C – T)/(C – 5 mm)] × 100, where C and T represent diameters of the colony cultured on blank control and dosed PDA, respectively. The potent products, which average inhibitory rate >80% at 100 mg/L against *Rhizoctonia solani*, was further evaluated by the median effective concentrations (EC<sub>50</sub>). Each experiment was conducted three times, and the statistical analyses of the data were performed using Office Excel 19.0. EC<sub>50</sub> values were calculated with the IBM SPSS Statistics 27.0 software.

**Table S3** *In vitro* antifungal activities of 3-70

| entry | compounds     | Inhibition Rate (%) (100 mg/L) |                           |                           |                           |
|-------|---------------|--------------------------------|---------------------------|---------------------------|---------------------------|
|       |               | <i>F. g.</i> <sup>a</sup>      | <i>B. c.</i> <sup>b</sup> | <i>R. s.</i> <sup>c</sup> | <i>S. s.</i> <sup>d</sup> |
| 1     | <b>rac-3</b>  | 41.6                           | 40.9                      | 59.7                      | 12.5                      |
| 2     | <b>rac-4</b>  | 9.1                            | 10.1                      | 11.2                      | 12.0                      |
| 3     | <b>rac-5</b>  | 19.2                           | 24.1                      | 55.7                      | 26.3                      |
| 4     | <b>rac-6</b>  | 11.9                           | -2.5                      | 53.8                      | 10.8                      |
| 5     | <b>rac-7</b>  | 23.6                           | 9.2                       | 52.4                      | -16.1                     |
| 6     | <b>rac-8</b>  | 28.3                           | 10.3                      | 57.9                      | 9.6                       |
| 7     | <b>rac-9</b>  | 43.6                           | 23.7                      | 47.9                      | 33.5                      |
| 8     | <b>rac-10</b> | 28.8                           | 5.4                       | 38.4                      | 18.1                      |
| 9     | <b>rac-11</b> | 9.6                            | 2.5                       | 46.5                      | -5.1                      |
| 10    | <b>rac-12</b> | 27.1                           | 5.7                       | 54.9                      | -4.6                      |
| 11    | <b>rac-13</b> | 54.4                           | 33.1                      | 62.5                      | 10.2                      |
| 12    | <b>rac-14</b> | 32.0                           | 24.4                      | 43.0                      | 25.4                      |
| 13    | <b>rac-15</b> | 65.0                           | 40.5                      | 68.1                      | 11.8                      |
| 14    | <b>rac-16</b> | 52.2                           | 59.0                      | 79.5                      | 42.4                      |
| 15    | <b>rac-17</b> | 58.6                           | 35.1                      | 86.9                      | 66.5                      |
| 16    | <b>rac-18</b> | 49.4                           | 47.0                      | 86.8                      | 48.3                      |
| 17    | <b>rac-19</b> | 54.7                           | 38.0                      | 90.7                      | 27.2                      |
| 18    | <b>rac-20</b> | -6.1                           | -3.1                      | 24.9                      | 2.8                       |
| 19    | <b>rac-21</b> | 43.7                           | 66.7                      | 66.7                      | 59.8                      |
| 20    | <b>rac-22</b> | 57.7                           | 68.4                      | 85.9                      | 64.1                      |
| 21    | <b>rac-23</b> | 29.4                           | 43.3                      | 86.8                      | 28.5                      |
| 22    | <b>rac-24</b> | 15.5                           | 18.0                      | 83.1                      | 5.6                       |

|    |               |       |       |      |       |
|----|---------------|-------|-------|------|-------|
| 23 | <b>rac-25</b> | 18.5  | 9.6   | 46.7 | 3.9   |
| 24 | <b>rac-26</b> | 62.6  | 37.6  | 61.8 | 29.2  |
| 25 | <b>rac-27</b> | 32    | 36.1  | 43.2 | 8.2   |
| 26 | <b>rac-28</b> | 21.9  | 22.5  | 56.4 | 44.9  |
| 27 | <b>rac-29</b> | 74.1  | 57.3  | 61.2 | 47.8  |
| 28 | <b>rac-30</b> | 23.7  | 18.6  | 41.6 | 10.8  |
| 29 | <b>rac-31</b> | 42.3  | 30.7  | 65.4 | 25.7  |
| 30 | <b>rac-32</b> | 64.9  | 39.1  | 64.8 | 33.9  |
| 31 | <b>rac-33</b> | 22.4  | 18.3  | 35.9 | 19.2  |
| 32 | <b>rac-34</b> | -15.6 | -19.5 | 2.4  | -28.4 |
| 33 | <b>rac-35</b> | 61.3  | 66.4  | 67.9 | 48.8  |
| 34 | <b>rac-36</b> | 76.0  | 71.5  | 89.9 | 30.6  |
| 35 | <b>rac-37</b> | -4.4  | -15.7 | 25.5 | 17.9  |
| 36 | <b>rac-38</b> | 64.5  | 50.7  | 60.1 | 41.6  |
| 37 | <b>rac-39</b> | 57.5  | 61.7  | 72.7 | 51    |
| 38 | <b>rac-40</b> | 29.6  | -14.6 | 47.3 | -16.0 |
| 39 | <b>rac-41</b> | 67.4  | 50.7  | 78.4 | 27.8  |
| 40 | <b>rac-42</b> | 49.2  | 52.6  | 78.2 | 32.9  |
| 41 | <b>rac-43</b> | 35.7  | 12.0  | 40.0 | 22.5  |
| 42 | <b>rac-44</b> | 67.1  | 68.3  | 87.3 | 62.0  |
| 43 | <b>rac-45</b> | 1.6   | 10.2  | 20.0 | 4.9   |
| 44 | <b>rac-46</b> | -11.3 | -3.8  | -4.9 | 5.5   |
| 45 | <b>rac-47</b> | 81.2  | 87.6  | 90.0 | 74.0  |
| 46 | <b>rac-48</b> | 30.7  | 8.0   | 22.1 | 4.7   |
| 47 | <b>rac-49</b> | 15.0  | 21.7  | 46.0 | 13.9  |
| 48 | <b>rac-50</b> | 45.3  | 34.7  | 75.8 | 32.5  |
| 49 | <b>rac-51</b> | -14.7 | -6.1  | 29.7 | -10.7 |
| 50 | <b>rac-52</b> | 47.6  | 76.6  | 70.9 | 55.4  |
| 51 | <b>rac-53</b> | 49.2  | 32.5  | 58.5 | 16.1  |
| 52 | <b>rac-54</b> | -10.4 | -17.2 | 10.3 | -18.2 |
| 53 | <b>rac-55</b> | 64.9  | 56.2  | 70.1 | 50.8  |
| 54 | <b>rac-56</b> | 41.5  | 39.1  | 62.9 | 29.6  |
| 55 | <b>rac-57</b> | -8.7  | 8.8   | 16.4 | 1.9   |
| 56 | <b>rac-58</b> | 75.1  | 67.5  | 78.4 | 51.4  |
| 57 | <b>rac-59</b> | 6.1   | 12.1  | 40.4 | 5.5   |
| 58 | <b>rac-60</b> | 36.4  | 18.0  | 50.3 | 26.2  |
| 59 | <b>rac-61</b> | 71.9  | 69.0  | 86.4 | 49.6  |
| 60 | <b>rac-62</b> | 42.8  | 16.8  | 37.1 | 5.5   |
| 61 | <b>rac-63</b> | 18.7  | 44.7  | 52.9 | 33.5  |
| 62 | <b>rac-64</b> | 35.7  | 48.9  | 50.8 | 37.6  |
| 63 | <b>rac-65</b> | 34.3  | 46.7  | 56.1 | 26.4  |
| 64 | <b>rac-66</b> | 26.9  | 39.6  | 43.2 | 29.7  |
| 65 | <b>rac-67</b> | 44.6  | 56.2  | 49.8 | 12.5  |
| 66 | <b>rac-68</b> | 38.6  | 43.1  | 60.3 | 19.8  |

|                 |                    |      |      |      |      |
|-----------------|--------------------|------|------|------|------|
| 67              | <b>rac-69</b>      | 39.5 | 33.7 | 63.2 | 20.4 |
| 68              | <b>rac-70</b>      | 33.6 | 35.6 | 49.4 | 18.7 |
| 69 <sup>e</sup> | <b>Boscalid</b>    | 35.7 | 89.6 | 94.9 | 94.4 |
| 70 <sup>f</sup> | <b>Procymidone</b> | 22.2 | 99.0 | 98.3 | 99.7 |

<sup>a</sup> *Fusarium graminearum*.

<sup>b</sup> *Botrytis cinerea*.

<sup>c</sup> *Rhizoctonia solani*.

<sup>d</sup> *Sclerotinia sclerotiorum*.

<sup>e,f</sup> positive control.

**Table S4** EC<sub>50</sub> Values against *Rhizoctonia solani*

| entry | compounds     | <i>Rhizoctonia solani</i> |                            |                |                 |
|-------|---------------|---------------------------|----------------------------|----------------|-----------------|
|       |               | y=ax+b                    | EC <sub>50</sub><br>(mg/L) | R <sup>2</sup> | 95%CI<br>(mg/L) |
| 1     | <b>rac-15</b> | y=1.53x-2.58              | 47.03                      | 0.97           | 38.99-58.81     |
| 2     | <b>rac-16</b> | y=2.32x-3.95              | 49.15                      | 0.97           | 43.15-56.78     |
| 3     | <b>rac-17</b> | y=1.43x-1.96              | 23.88                      | 0.98           | 19.64-28.97     |
| 4     | <b>rac-18</b> | y=1.63x-2.46              | 31.77                      | 0.89           | 16.98-71.86     |
| 5     | <b>rac-19</b> | y=1.62x-2.25              | 24.21                      | 0.98           | 20.30-28.80     |
| 6     | <b>rac-22</b> | y=1.39x-2.13              | 35.37                      | 0.91           | 20.03-83.38     |
| 7     | <b>rac-23</b> | y=1.90x-2.94              | 32.93                      | 0.84           | 19.69-50.28     |
| 8     | <b>rac-24</b> | y=1.56x-2.15              | 24.08                      | 0.99           | 20.14-28.75     |
| 9     | <b>rac-36</b> | y=1.60x-2.21              | 24.17                      | 0.99           | 20.30-28.72     |
| 10    | <b>rac-44</b> | y=2.13x-2.79              | 22.35                      | 0.95           | 21.59-29.65     |
| 11    | <b>rac-47</b> | y=1.94x-2.65              | 22.01                      | 0.99           | 18.65-25.89     |
| 12    | <b>(S)-47</b> | y=1.20x-1.54              | 19.41                      | 0.96           | 15.14-24.31     |
| 13    | <b>(R)-47</b> | y=1.24x-1.53              | 17.43                      | 0.93           | 8.59-28.73      |
| 14    | <b>rac-61</b> | y=1.83x-2.55              | 25.29                      | 0.98           | 21.59-29.65     |

## 7. References

- [1] C. Defieber, M. A. Ariger, P. Moriel, E. M. Carreira, Iridium-Catalyzed Synthesis of Primary Allylic Amines from Allylic Alcohols: Sulfamic Acid as Ammonia Equivalent, *Angew. Chem. Int. Ed.* 2007, **46**, 3139-3143.
- [2] J. Zhang, W. L. Yang, H. Zheng, Y. Wang, W.-P. Deng, Regio- and Enantioselective  $\gamma$ -Allylic Alkylation of In Situ-Generated Free Dienolates via Scandium/Iridium Dual Catalysis, *Angew. Chem. Int. Ed.* 2022, **61**, e202117079.
- [3] C. Venkatesh, B. Singh, P. K. Mahata, H. Ila, H. Junjappa, Heteroannulation of Nitroketene *N,S*-Arylaminoacetals with  $\text{POCl}_3$ : A Novel Highly Regioselective Synthesis of Unsymmetrical 2,3-Substituted Quinoxalines, *Org. Lett.* 2005, **7**, 2169-2172.

## 8. $^1\text{H}$ NMR, $^{13}\text{C}$ NMR and $^{19}\text{F}$ NMR spectra

$^1\text{H}$  NMR (400 MHz) of **3** in  $\text{CDCl}_3$

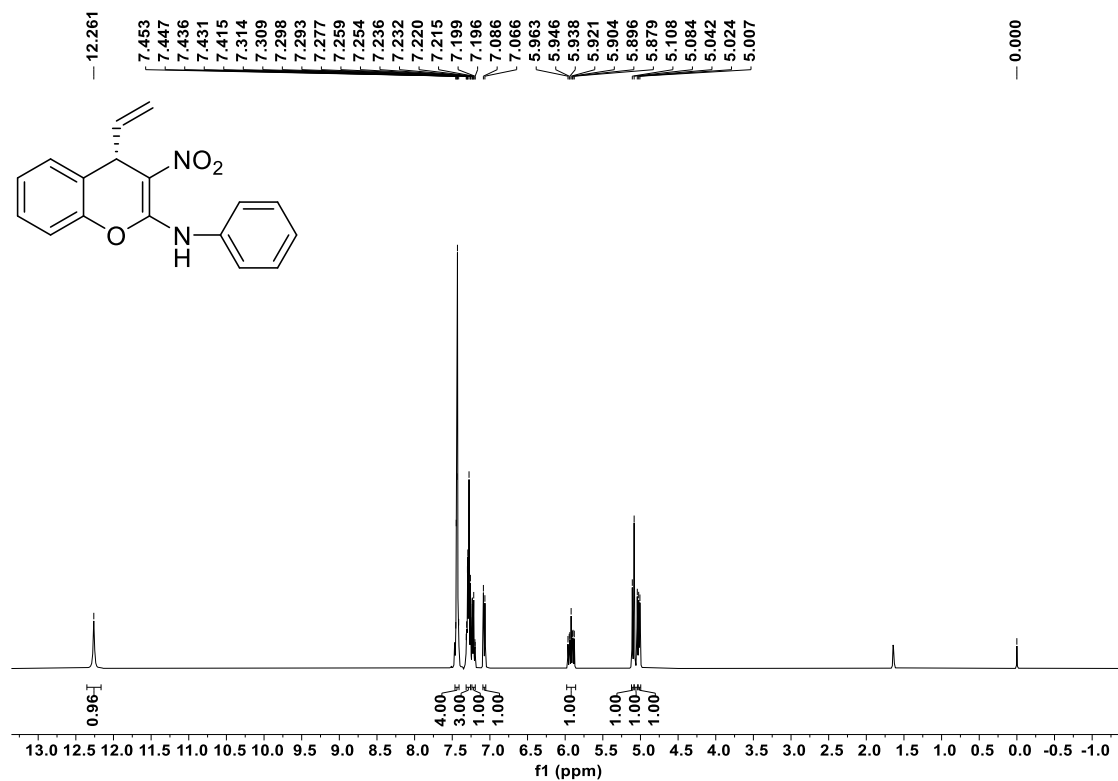

$^{13}\text{C}$  NMR (100 MHz) of **3** in  $\text{CDCl}_3$

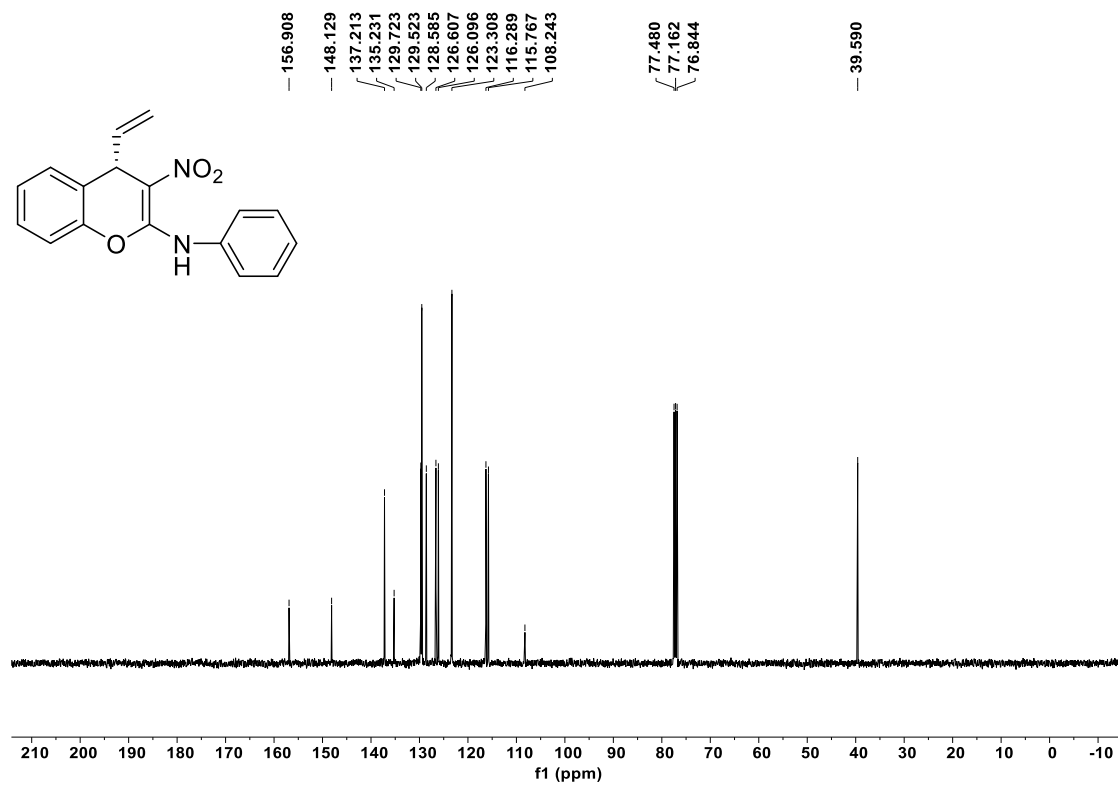

<sup>1</sup>H NMR (400 MHz) of **4** in CDCl<sub>3</sub>

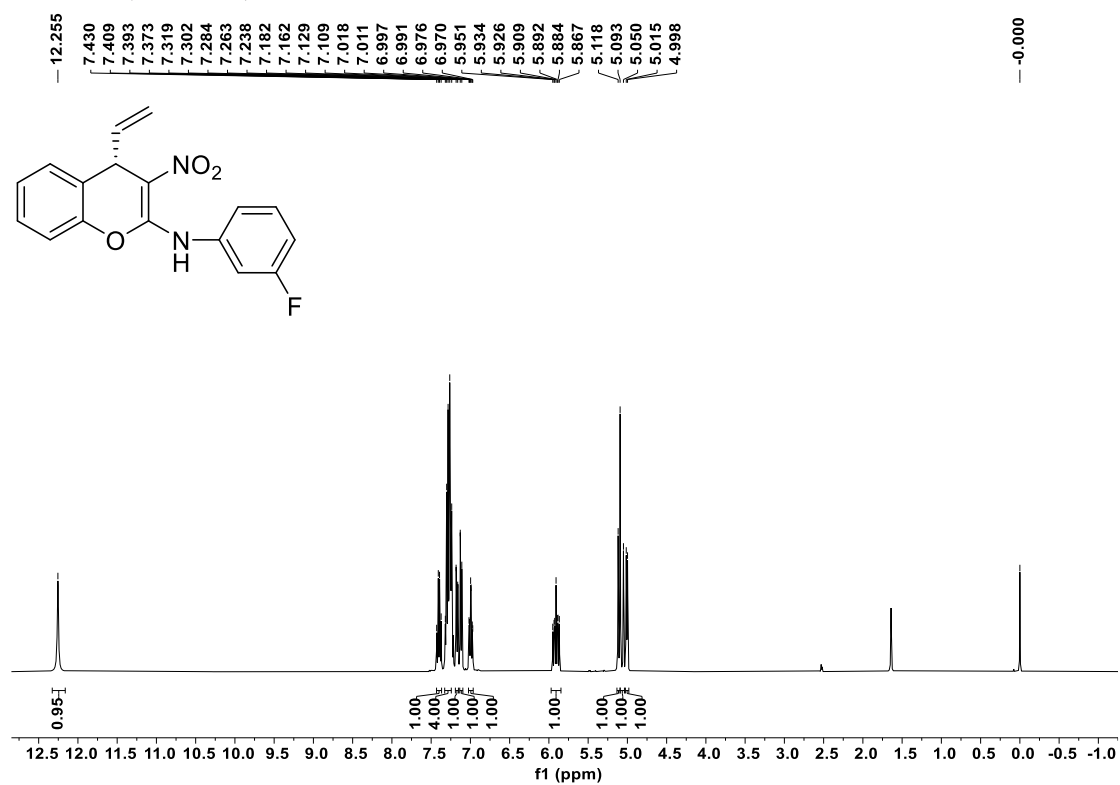

<sup>13</sup>C NMR (100 MHz) of **4** in CDCl<sub>3</sub>

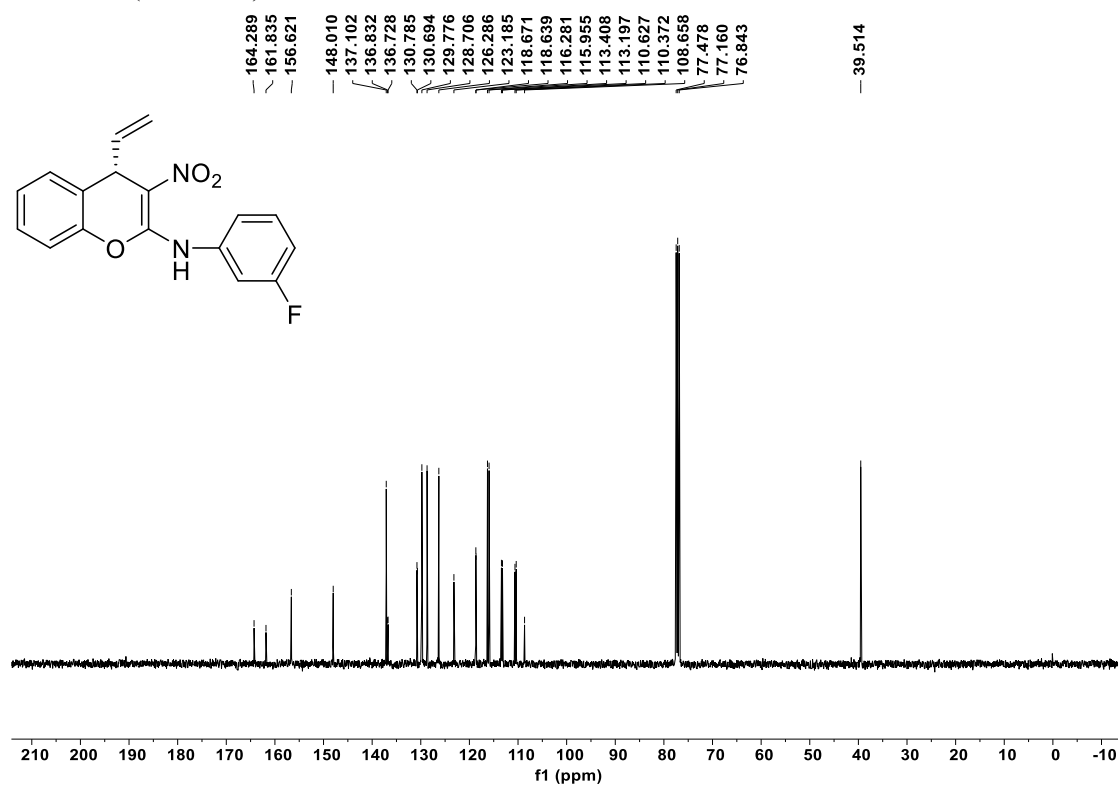

$^{19}\text{F}$  NMR (376 MHz) of **4** in  $\text{CDCl}_3$

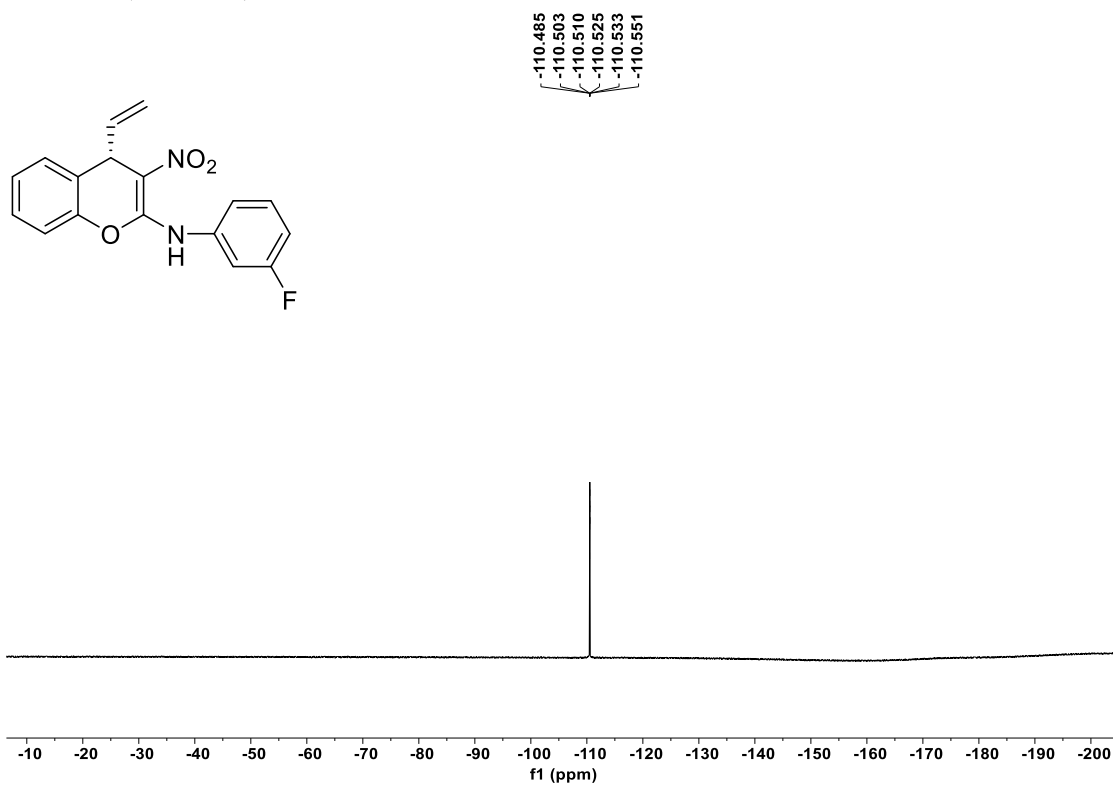

$^{19}\text{F}$  NMR (376 MHz,  $\text{CDCl}_3$ )  $\delta$  -110.48 – -110.55(m).



<sup>1</sup>H NMR (400 MHz) of **5** in CDCl<sub>3</sub>

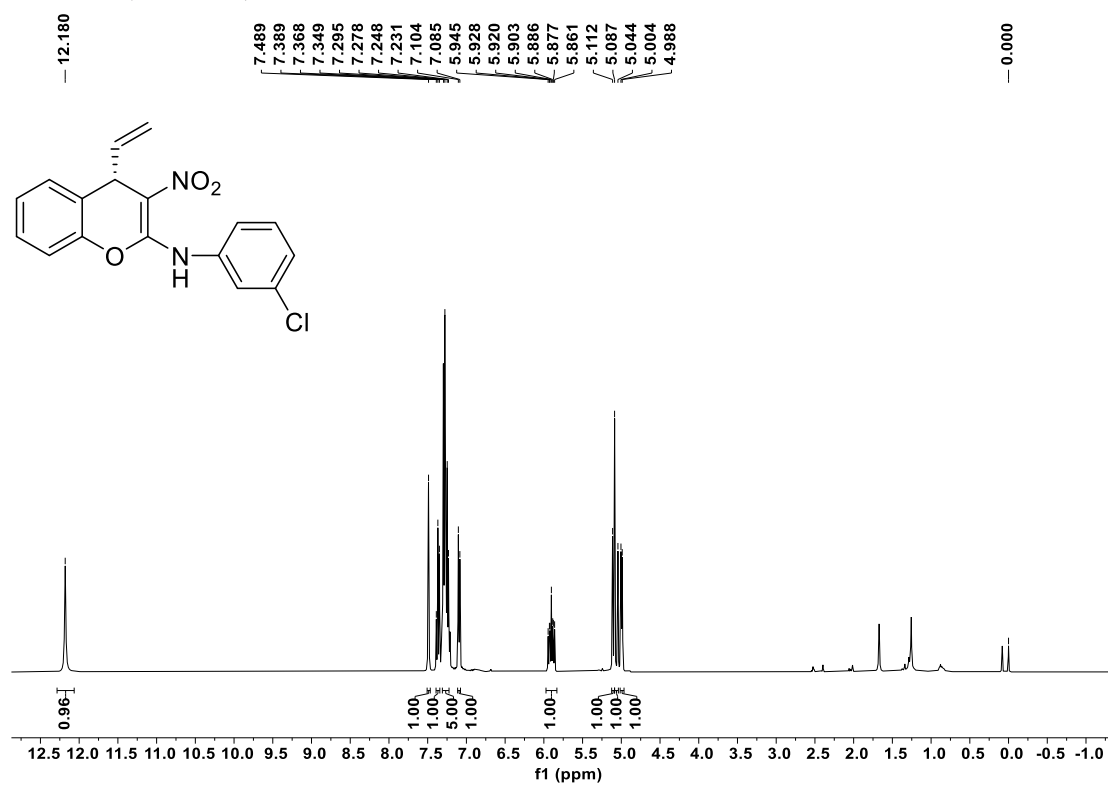

<sup>13</sup>C NMR (100 MHz) of **5** in CDCl<sub>3</sub>

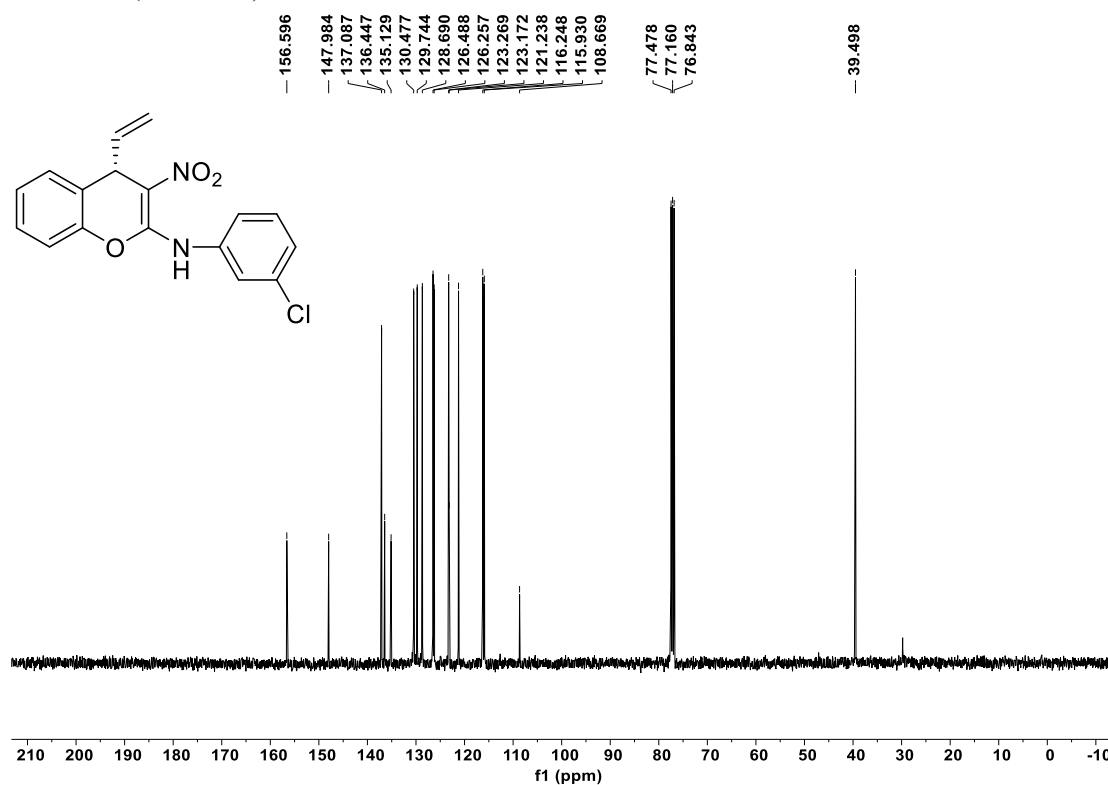

<sup>1</sup>H NMR (400 MHz) of **6** in CDCl<sub>3</sub>

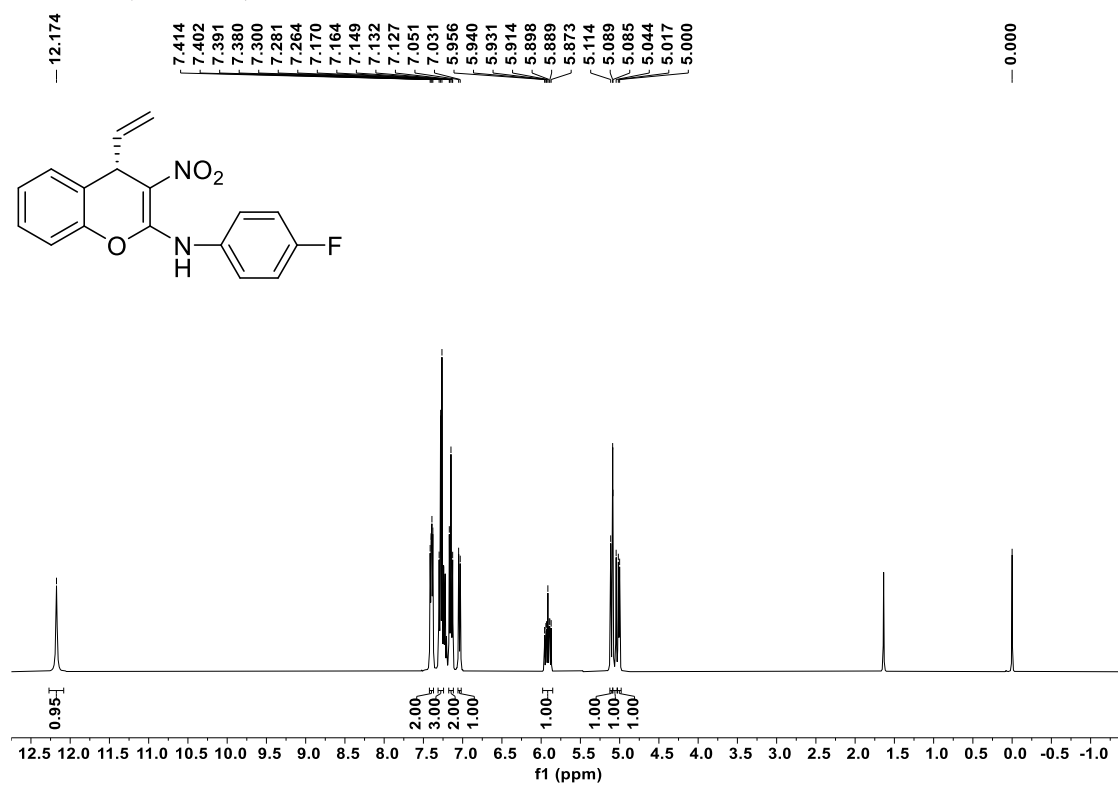

<sup>13</sup>C NMR (100 MHz) of **6** in CDCl<sub>3</sub>

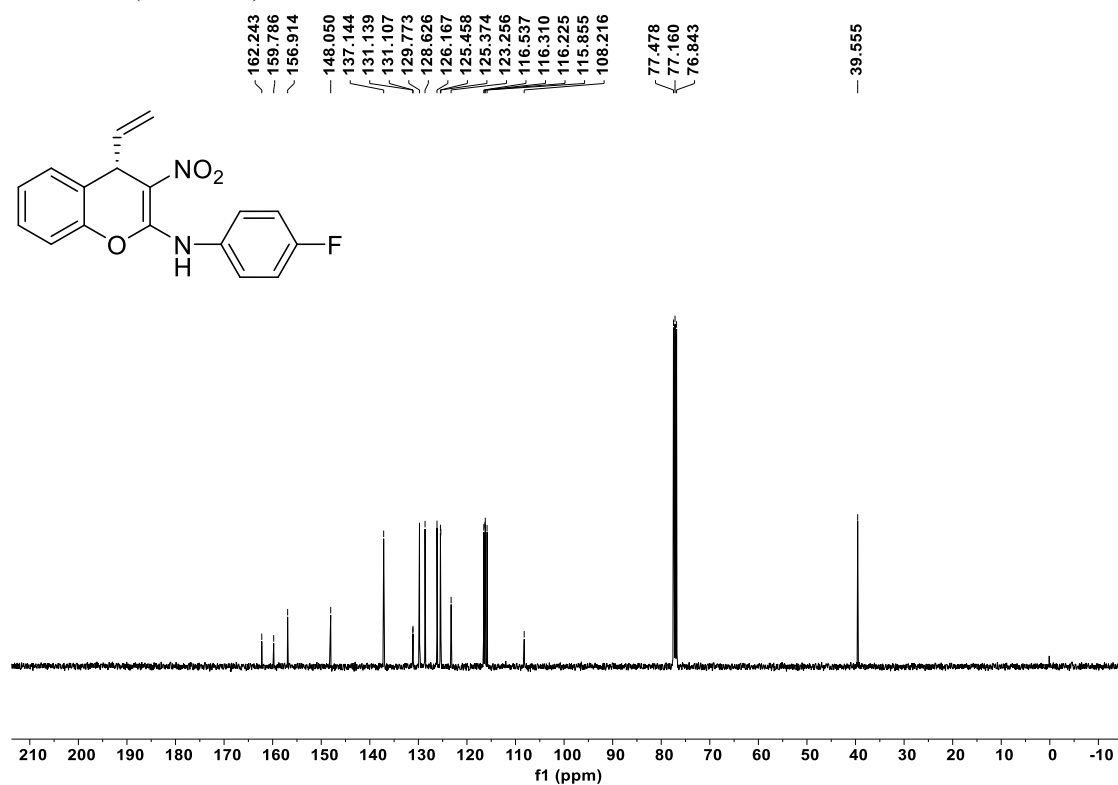

$^{19}\text{F}$  NMR (376 MHz) of **6** in  $\text{CDCl}_3$

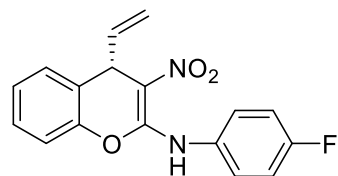

-114.616  
-114.629  
-114.638  
-114.650  
-114.662  
-114.672  
-114.684

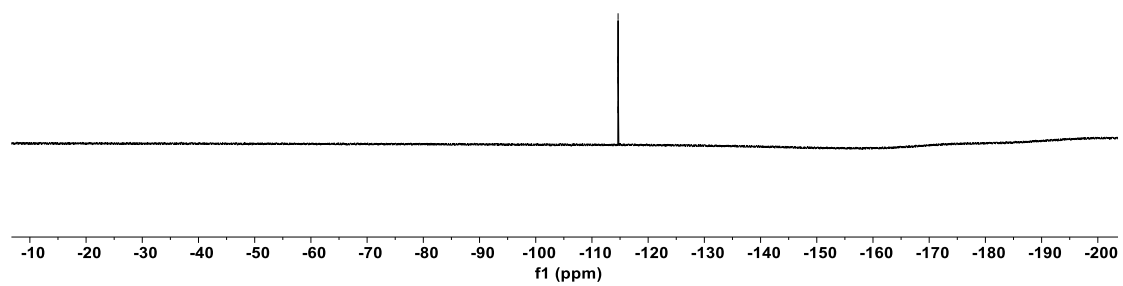

$^1\text{H}$  NMR (400 MHz) of **7** in  $\text{CDCl}_3$

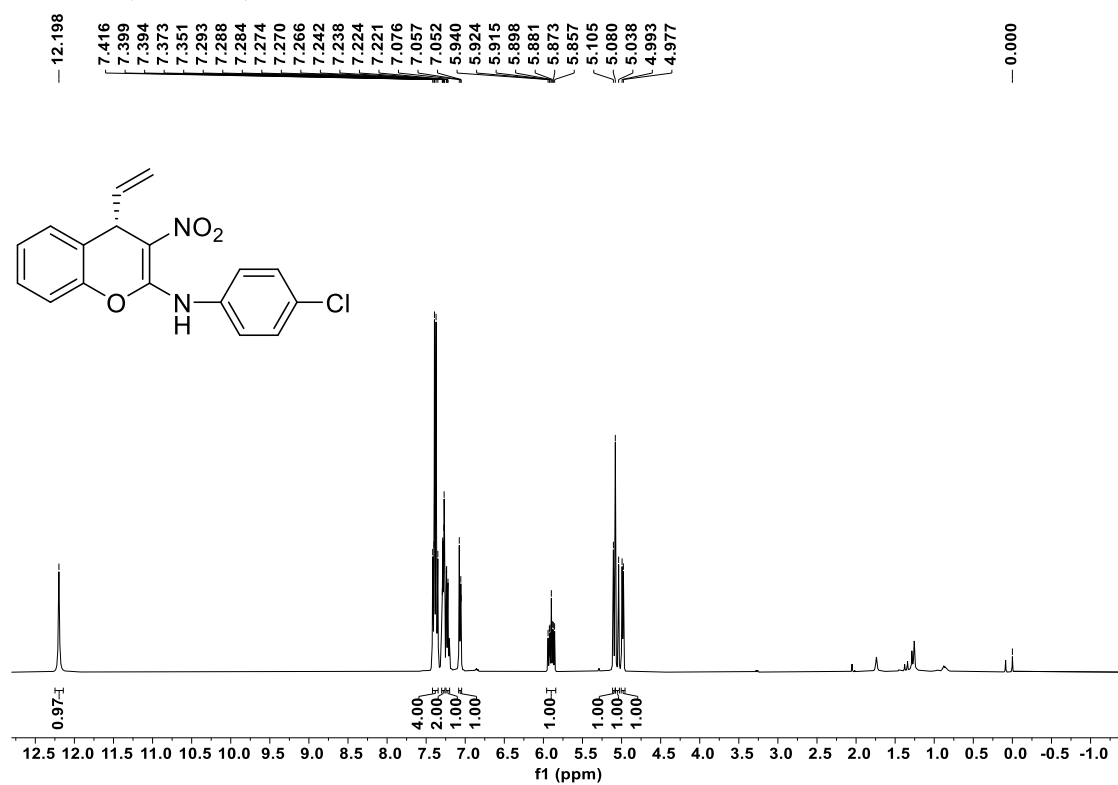

$^{13}\text{C}$  NMR (100 MHz) of **7** in  $\text{CDCl}_3$

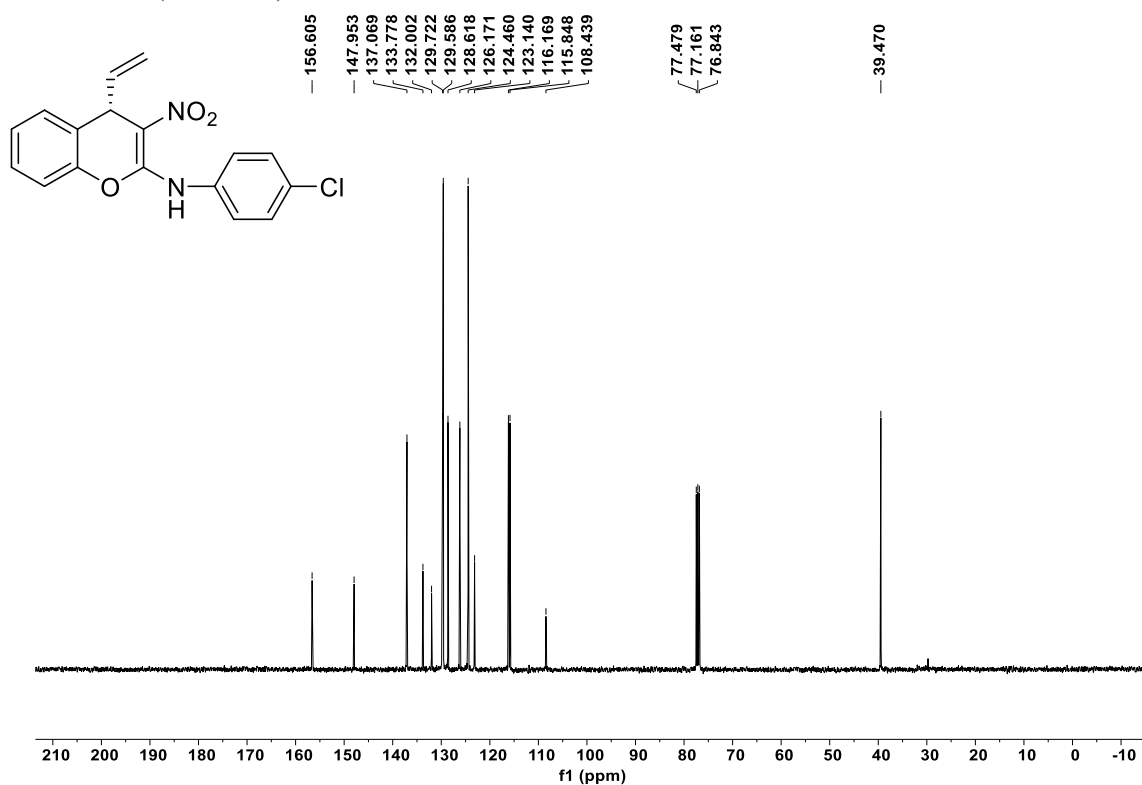

$^1\text{H}$  NMR (400 MHz) of **8** in  $\text{CDCl}_3$

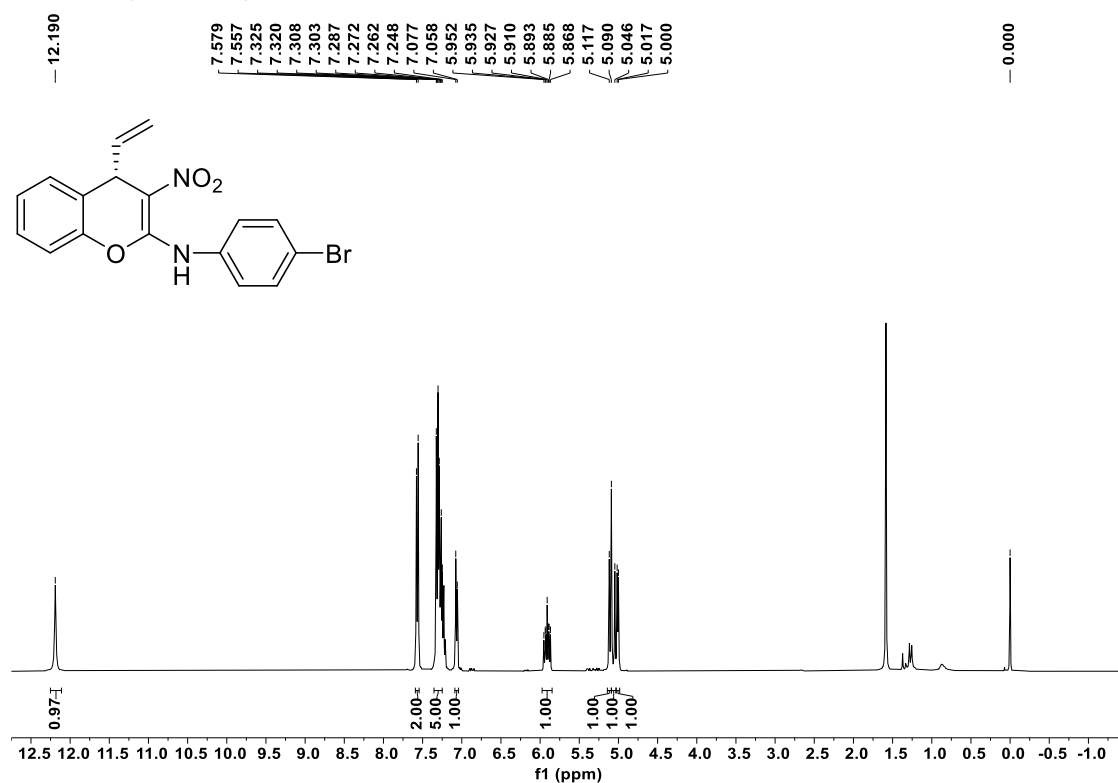

$^{13}\text{C}$  NMR (100 MHz) of **8** in  $\text{CDCl}_3$

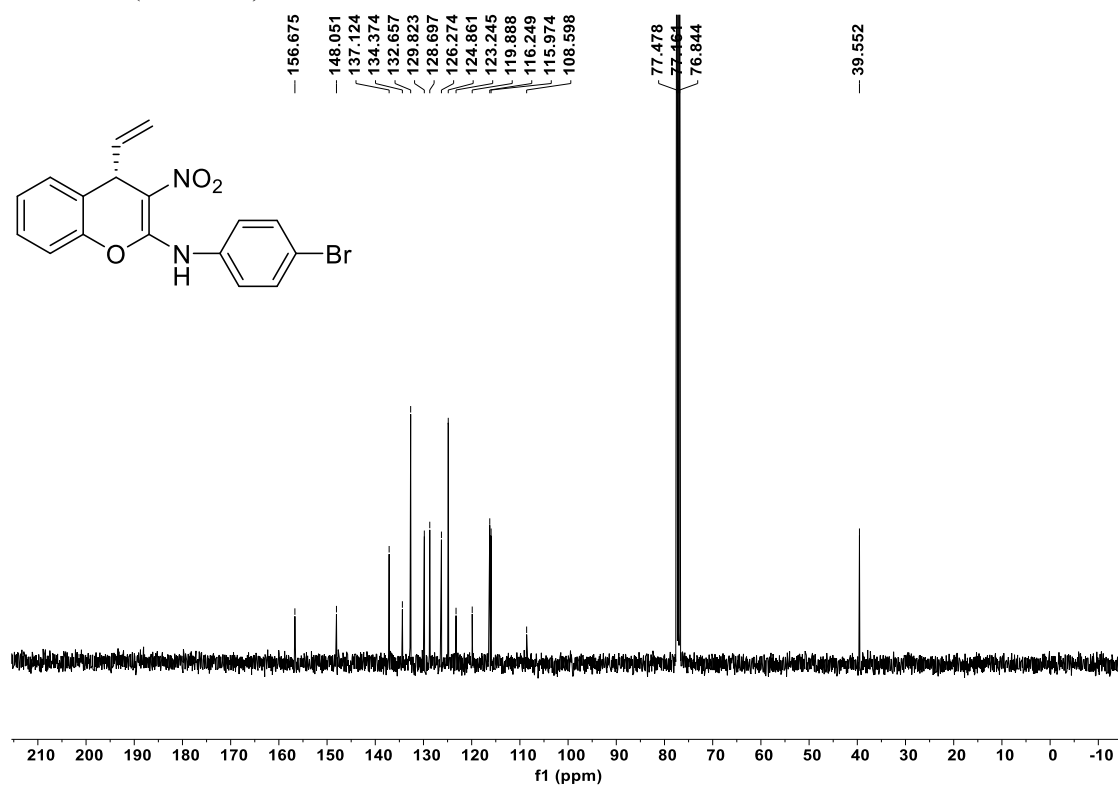

$^{13}\text{C}$  NMR (100 MHz,  $\text{CDCl}_3$ )  $\delta$  156.7, 148.1, 137.1, 134.4, 132.7(2C), 129.8, 128.7, 126.3, 124.9(2C), 123.2, 119.9, 116.3, 115.9, 108.6, 39.6.

<sup>1</sup>H NMR (400 MHz) of **9** in CDCl<sub>3</sub>

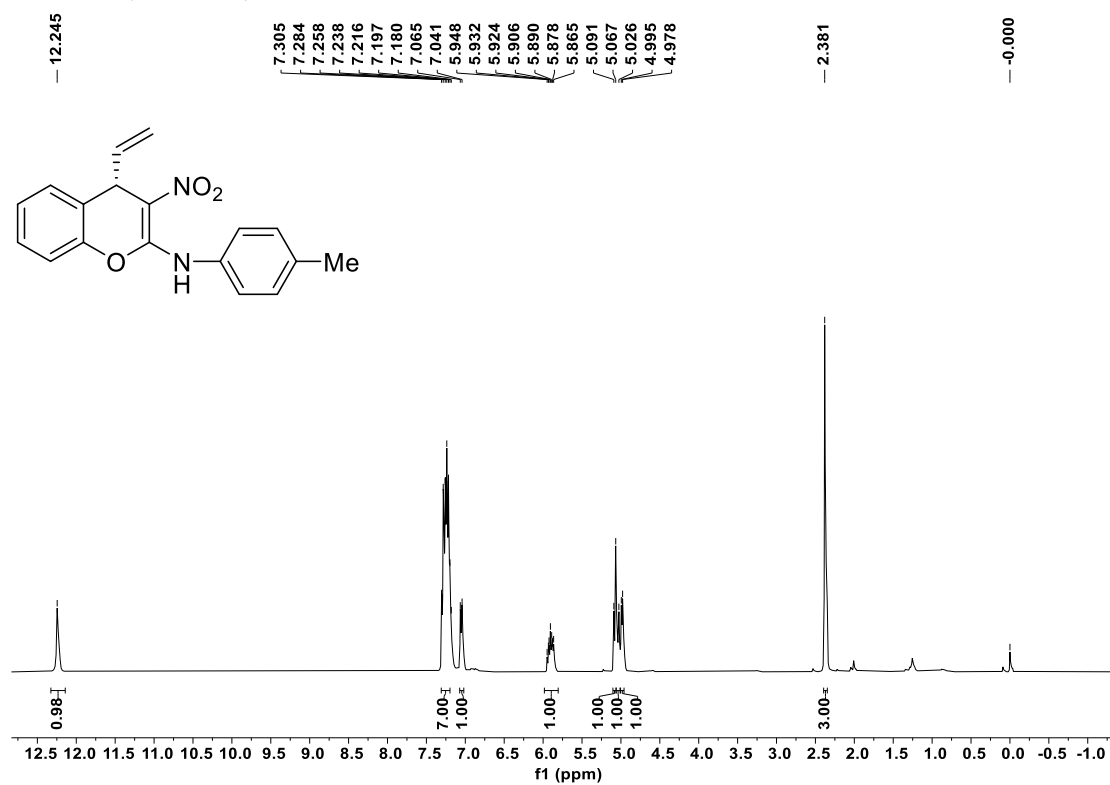

<sup>13</sup>C NMR (100 MHz) of **9** in CDCl<sub>3</sub>

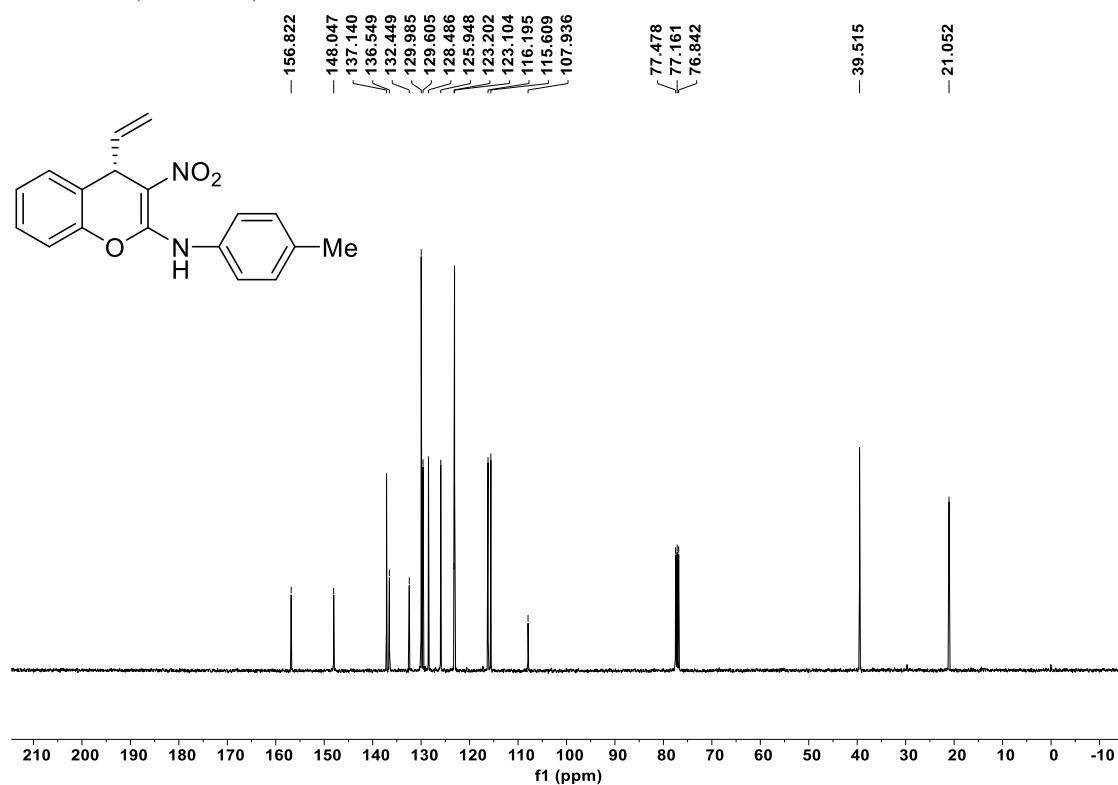

<sup>1</sup>H NMR (400 MHz) of **10** in CDCl<sub>3</sub>

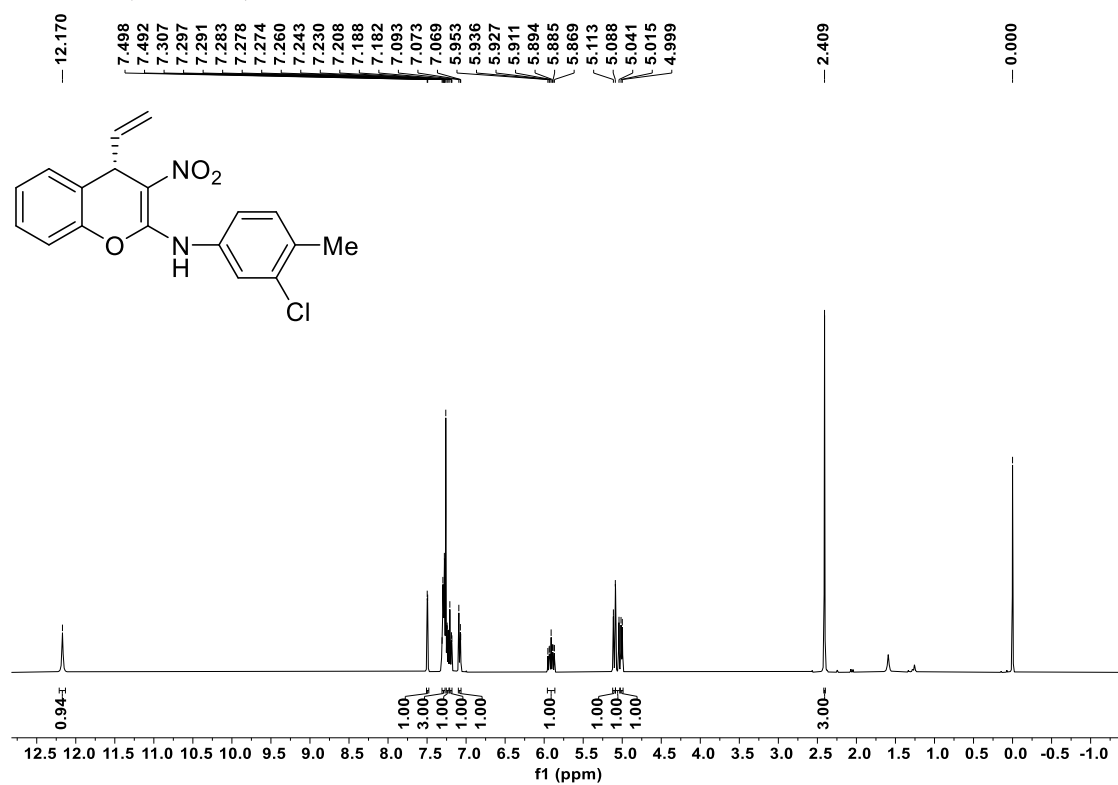

<sup>13</sup>C NMR (100 MHz) of **10** in CDCl<sub>3</sub>

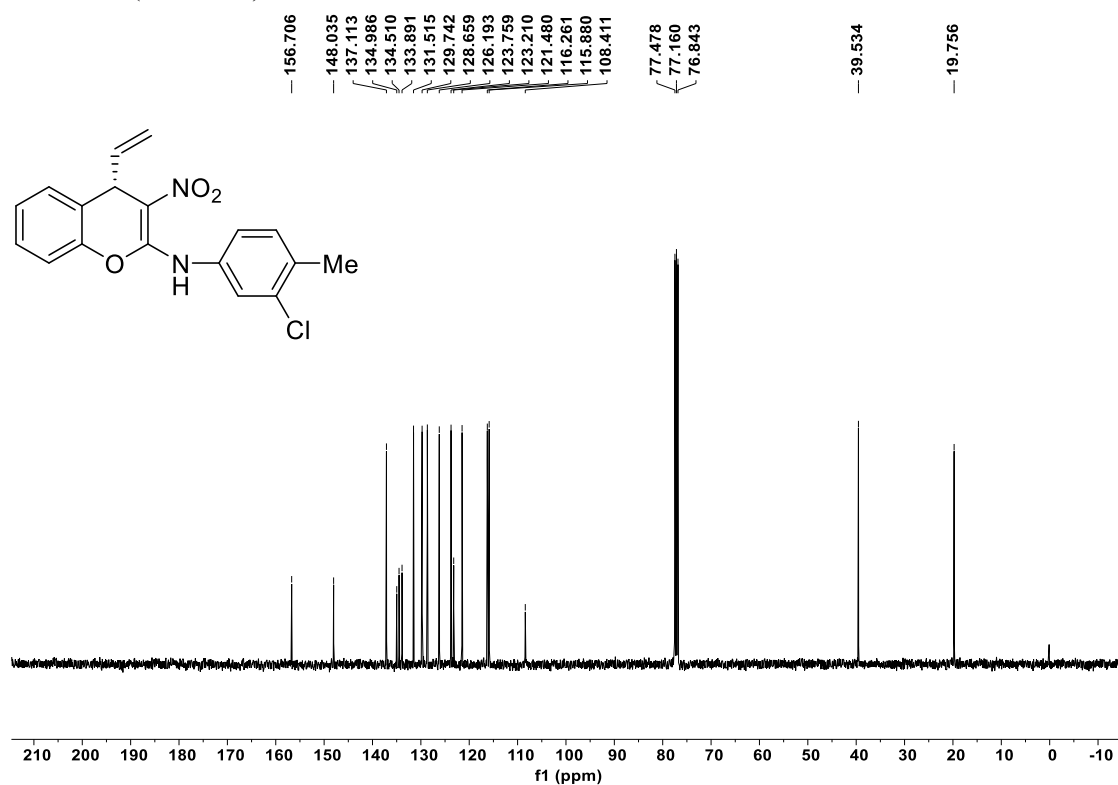

<sup>1</sup>H NMR (400 MHz) of **11** in CDCl<sub>3</sub>

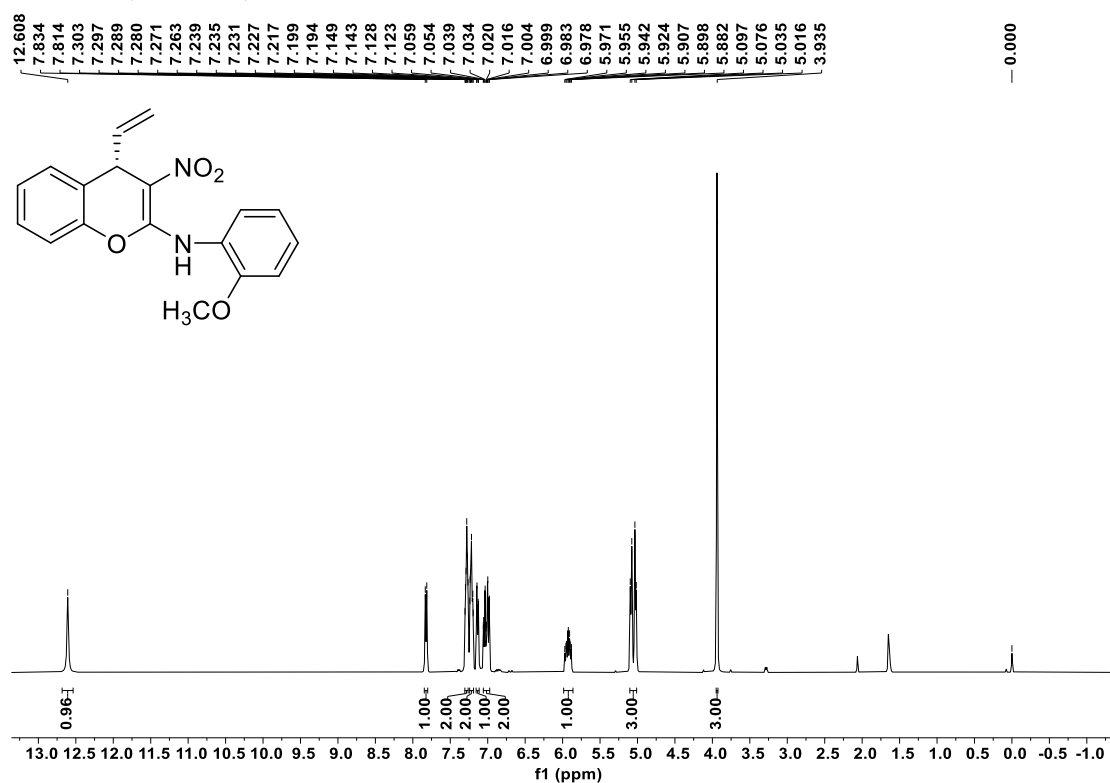

<sup>13</sup>C NMR (100 MHz) of **11** in CDCl<sub>3</sub>

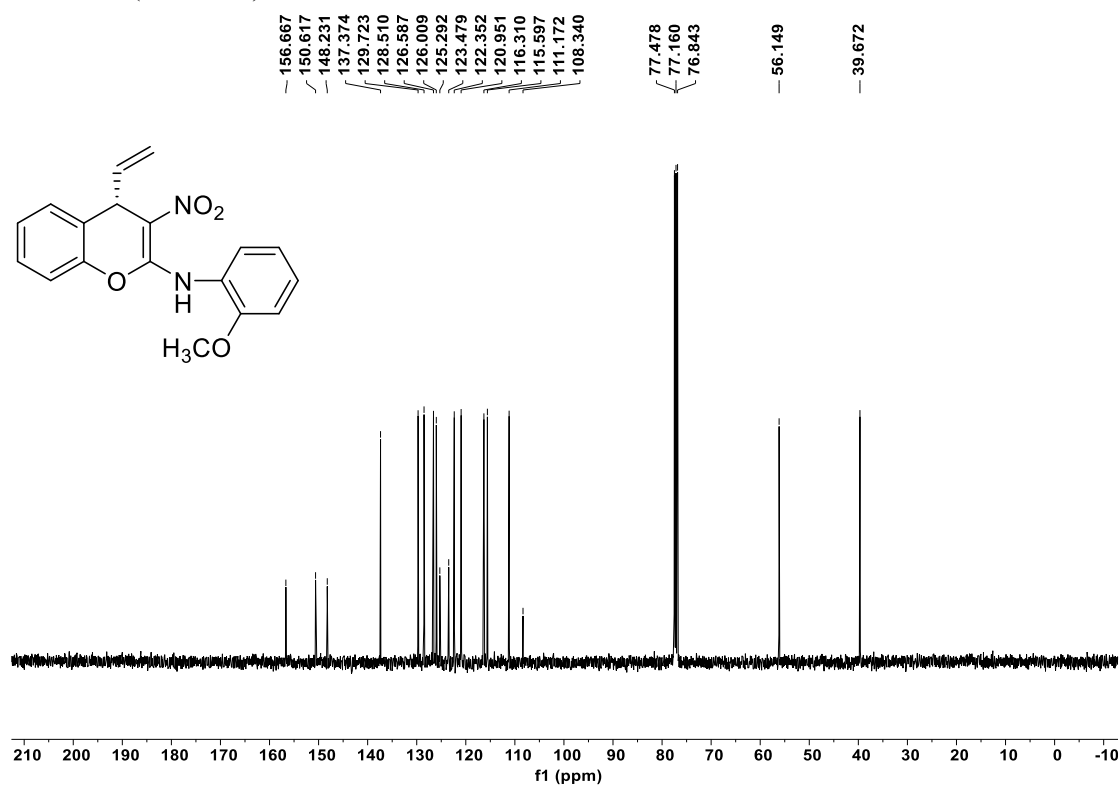



<sup>1</sup>H NMR (400 MHz) of **12** in CDCl<sub>3</sub>

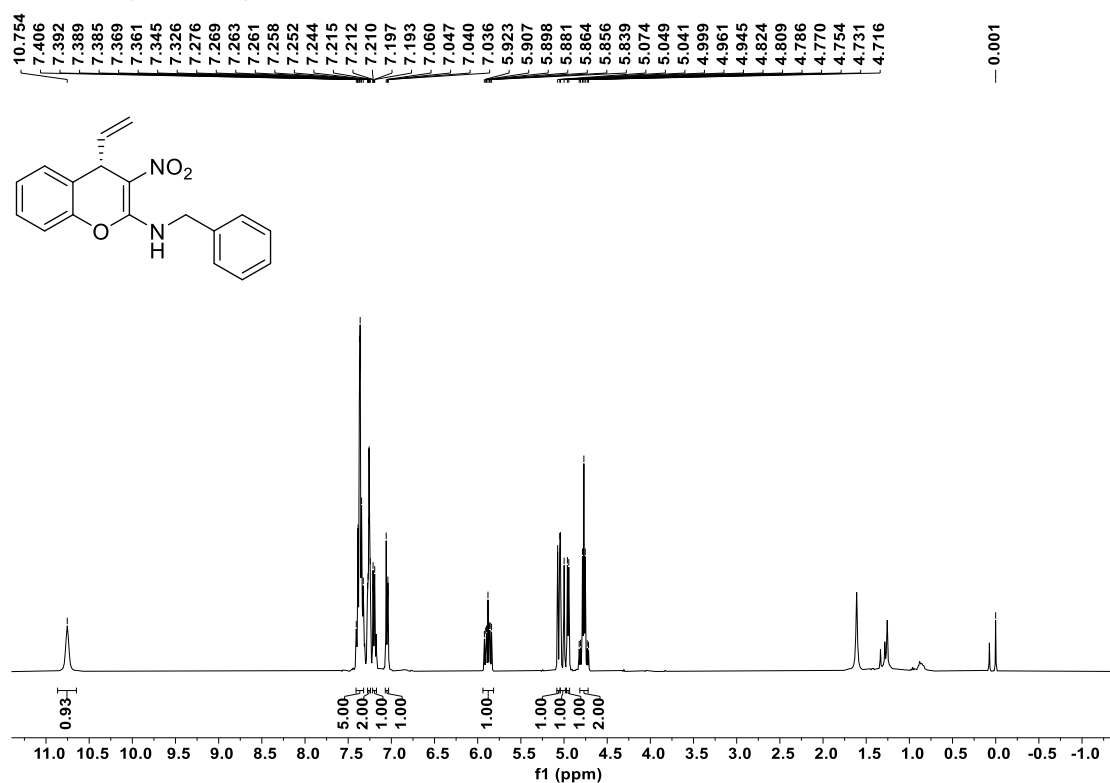

<sup>13</sup>C NMR (100 MHz) of **12** in CDCl<sub>3</sub>

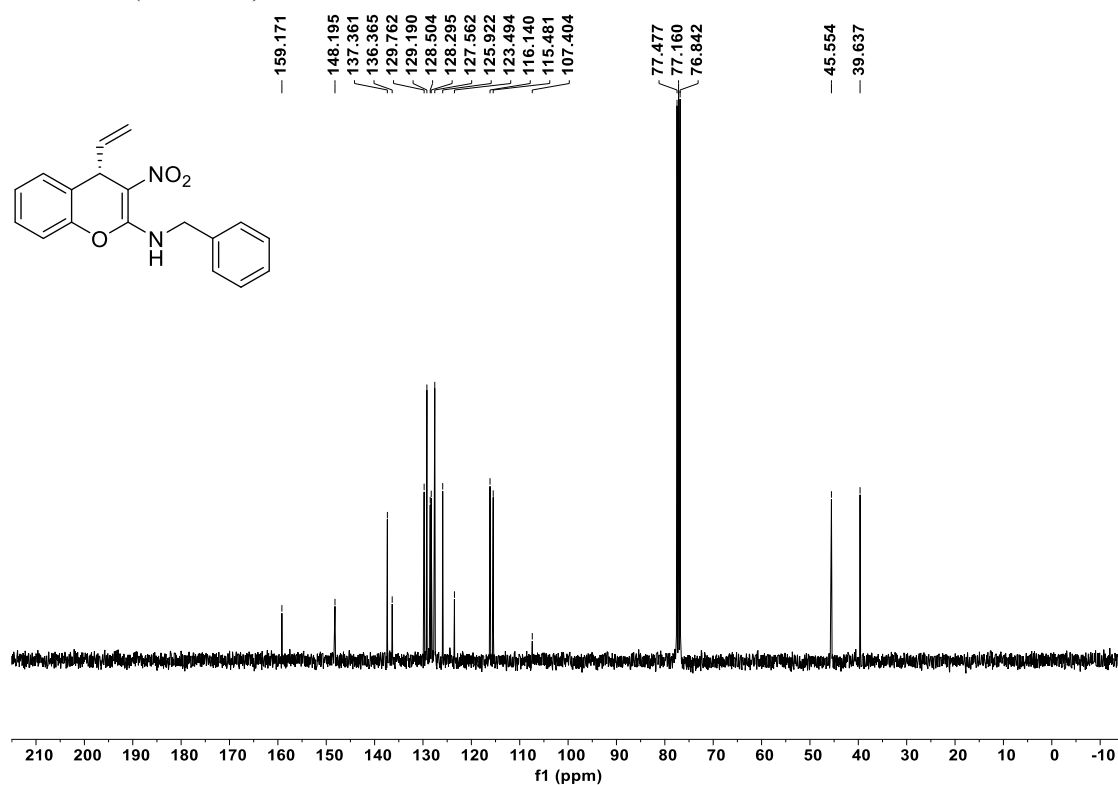

<sup>1</sup>H NMR (400 MHz) of **13** in CDCl<sub>3</sub>

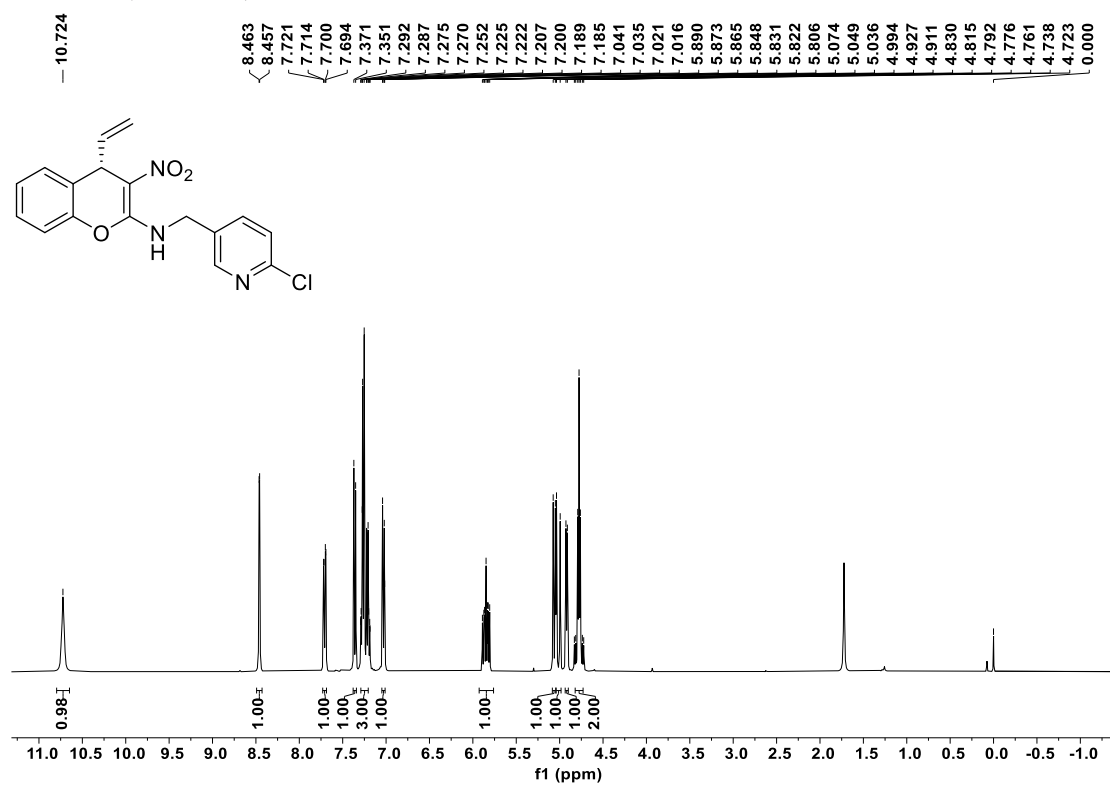

<sup>13</sup>C NMR (100 MHz) of **13** in CDCl<sub>3</sub>

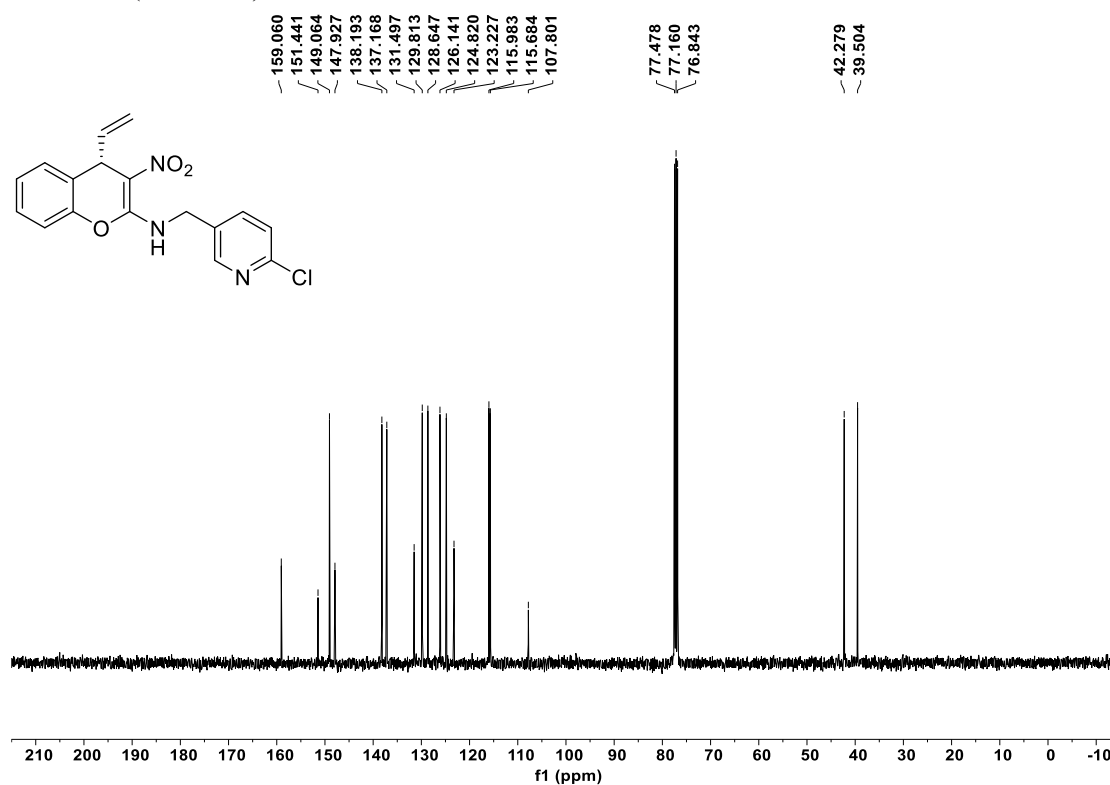

<sup>1</sup>H NMR (400 MHz) of **14** in CDCl<sub>3</sub>

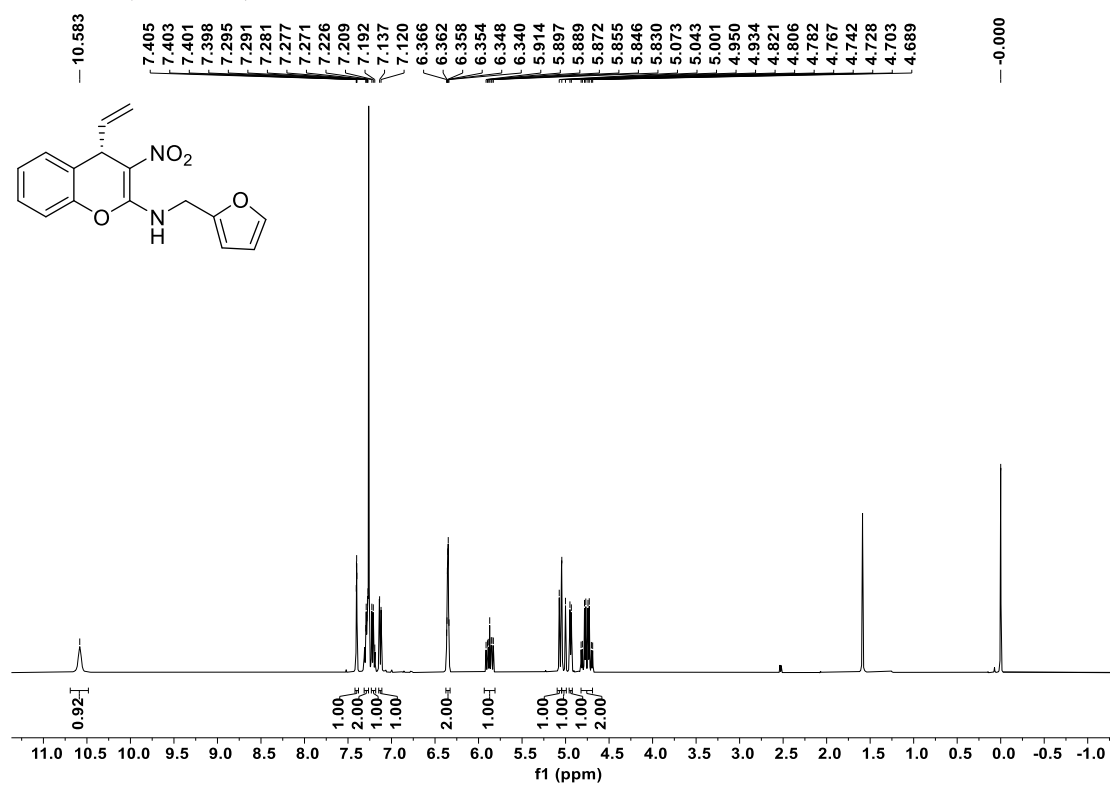

<sup>13</sup>C NMR (100 MHz) of **14** in CDCl<sub>3</sub>

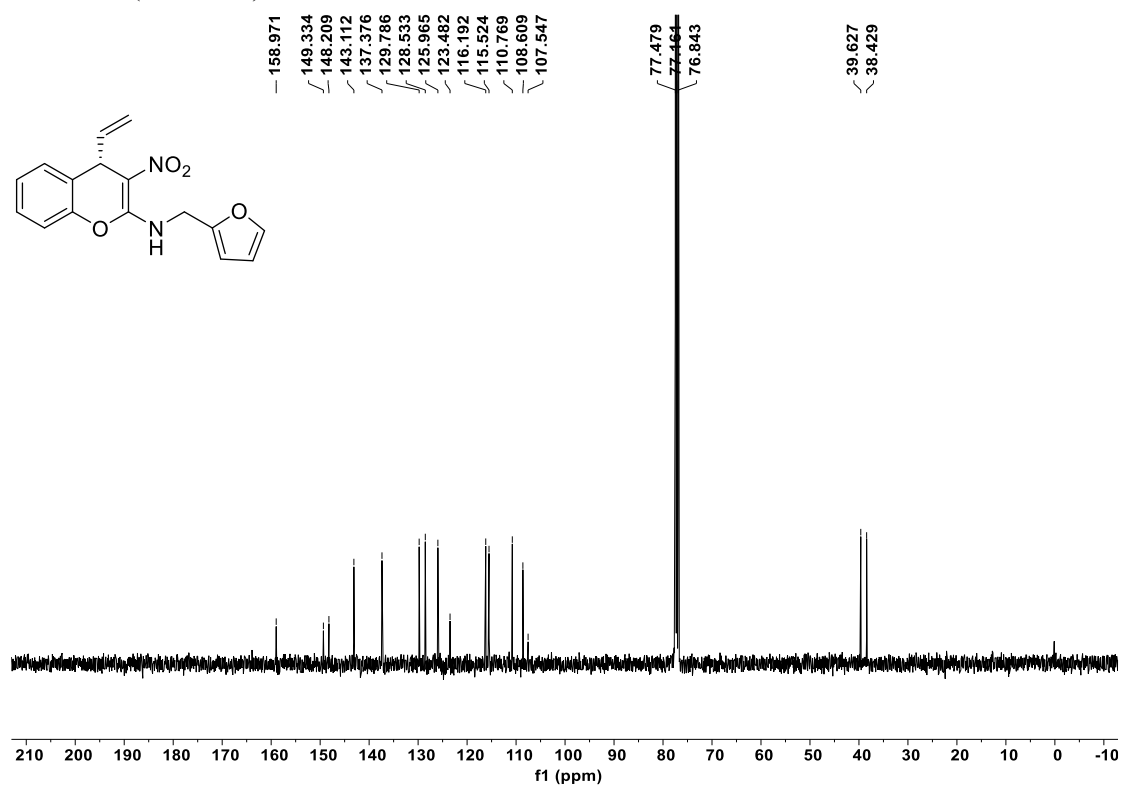

<sup>1</sup>H NMR (400 MHz) of **15** in CDCl<sub>3</sub>

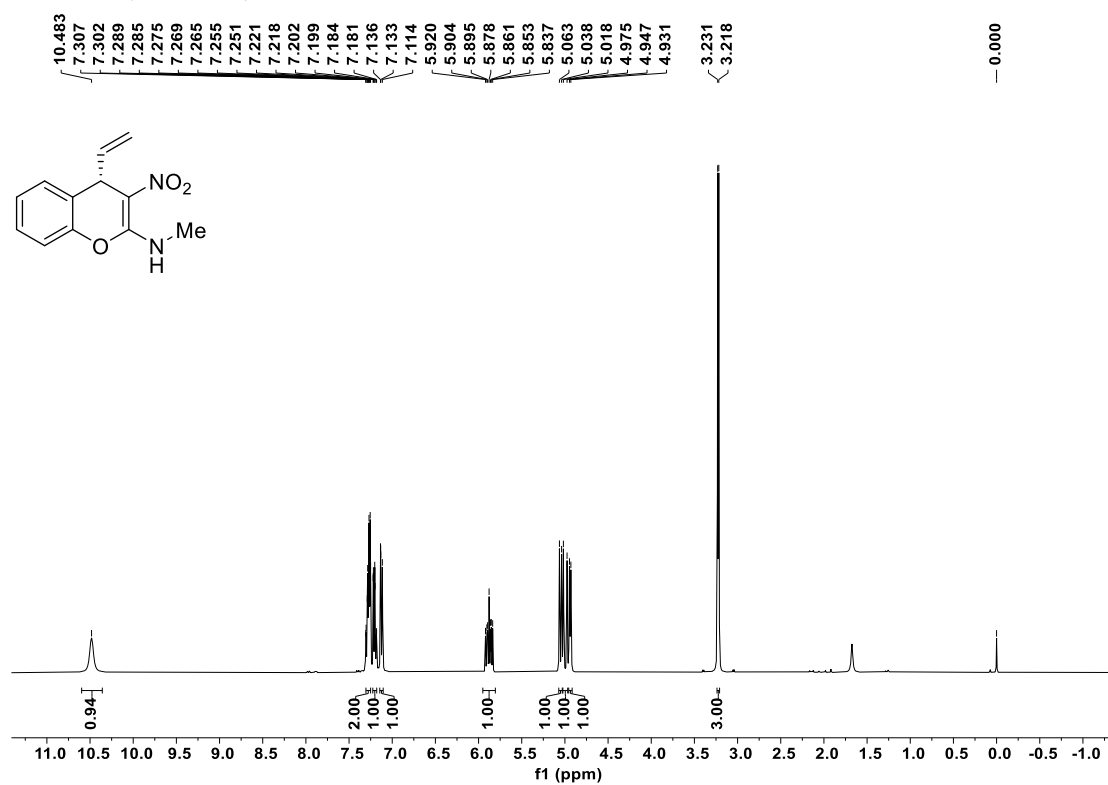

<sup>13</sup>C NMR (100 MHz) of **15** in CDCl<sub>3</sub>

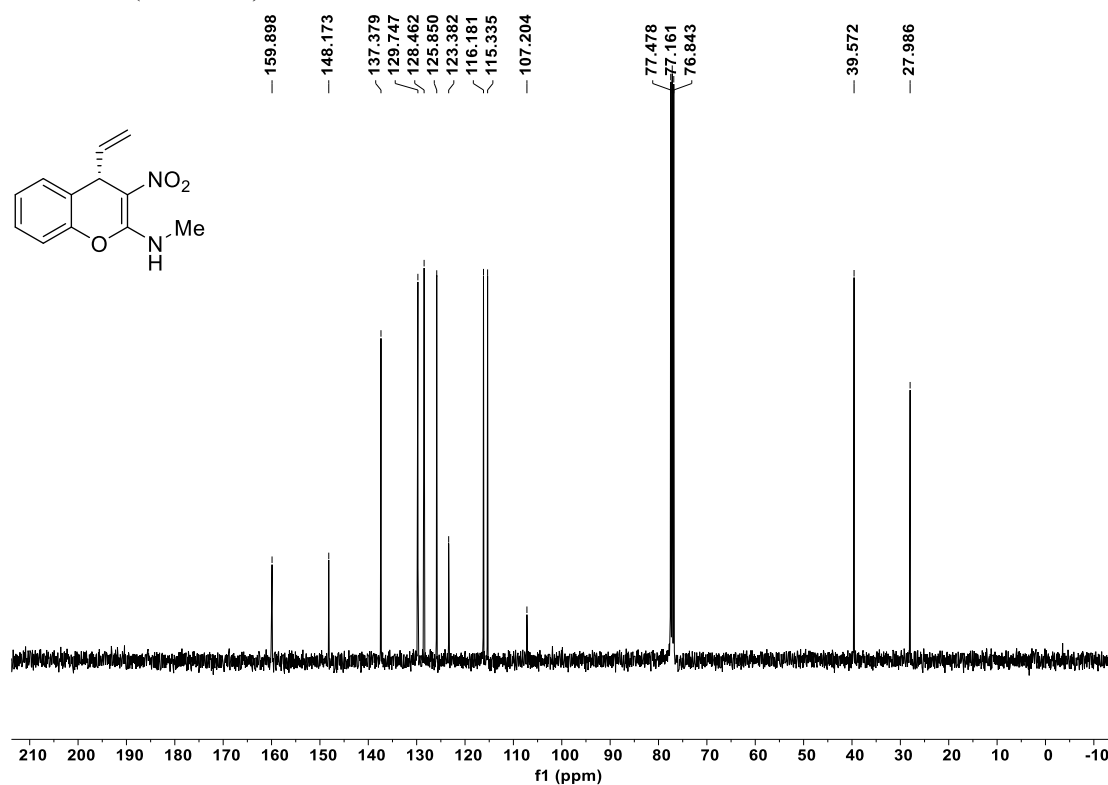

<sup>1</sup>H NMR (400 MHz) of **16** in CDCl<sub>3</sub>

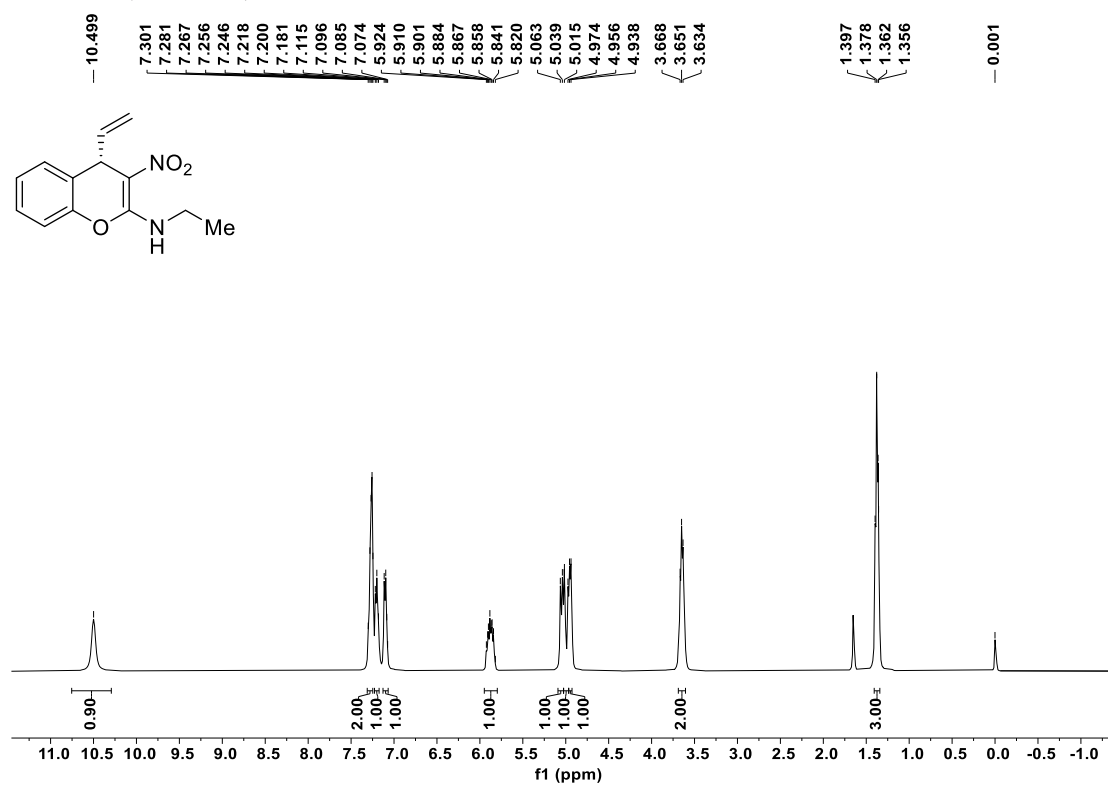

<sup>13</sup>C NMR (100 MHz) of **16** in CDCl<sub>3</sub>

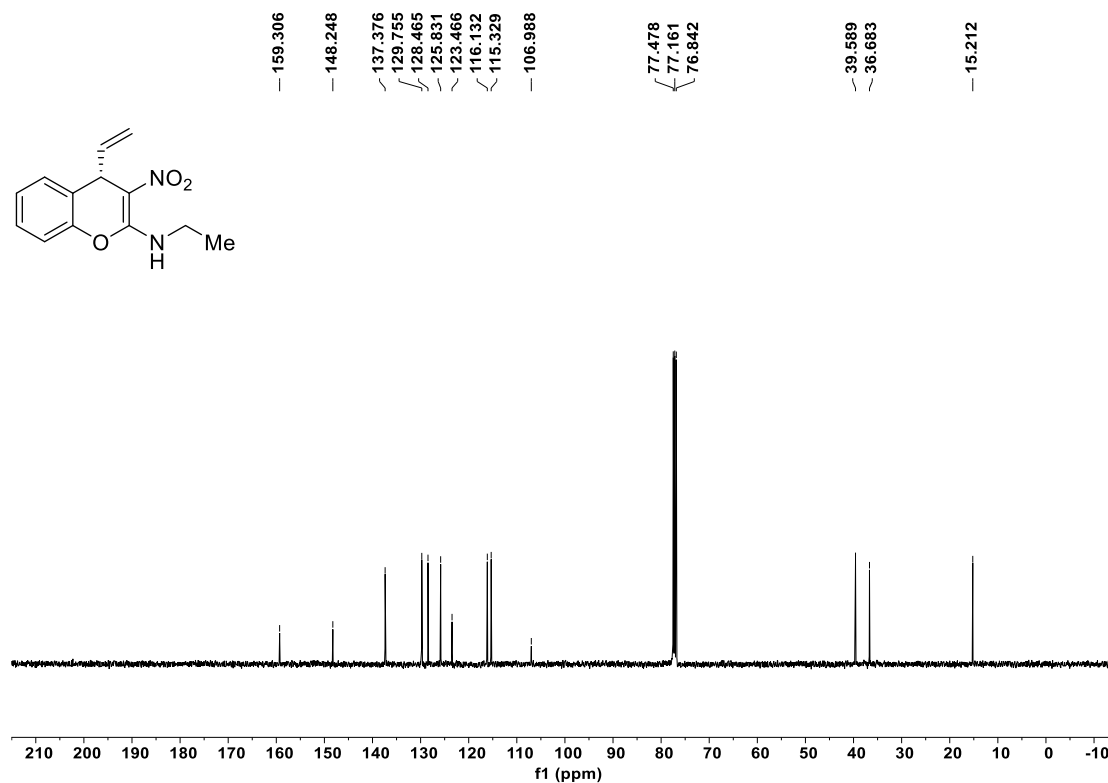

<sup>1</sup>H NMR (400 MHz) of **17** in CDCl<sub>3</sub>

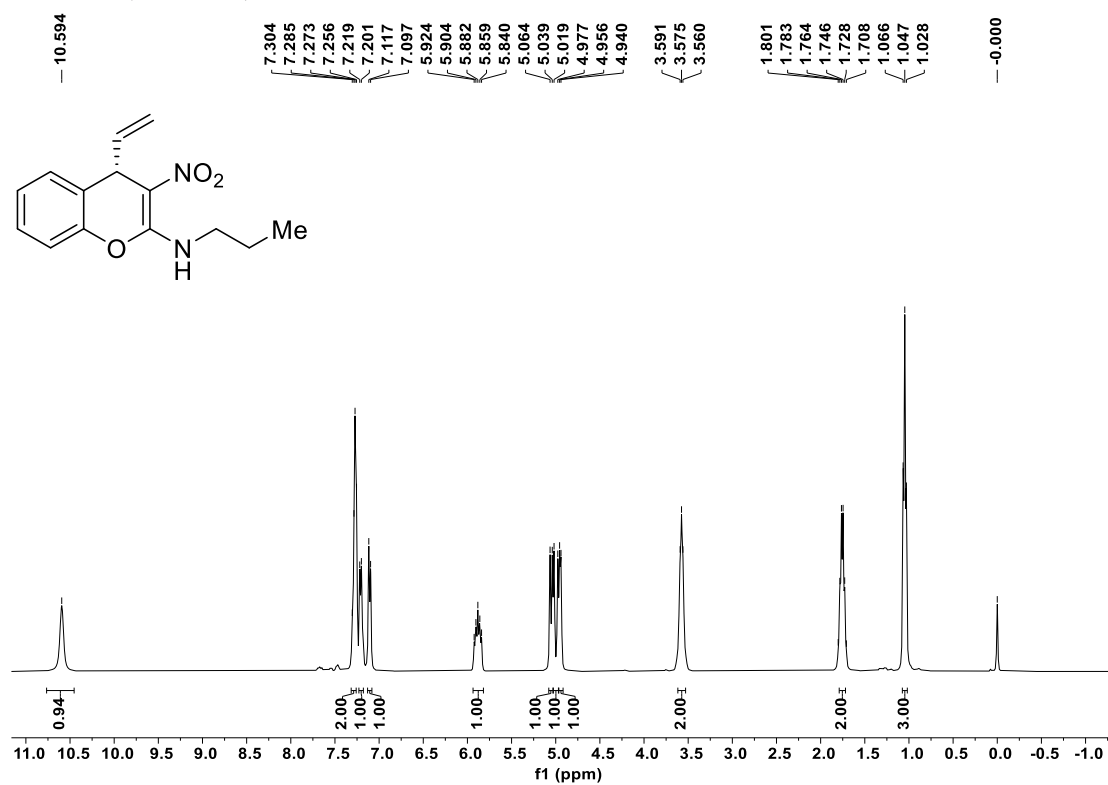

<sup>13</sup>C NMR (100 MHz) of **17** in CDCl<sub>3</sub>

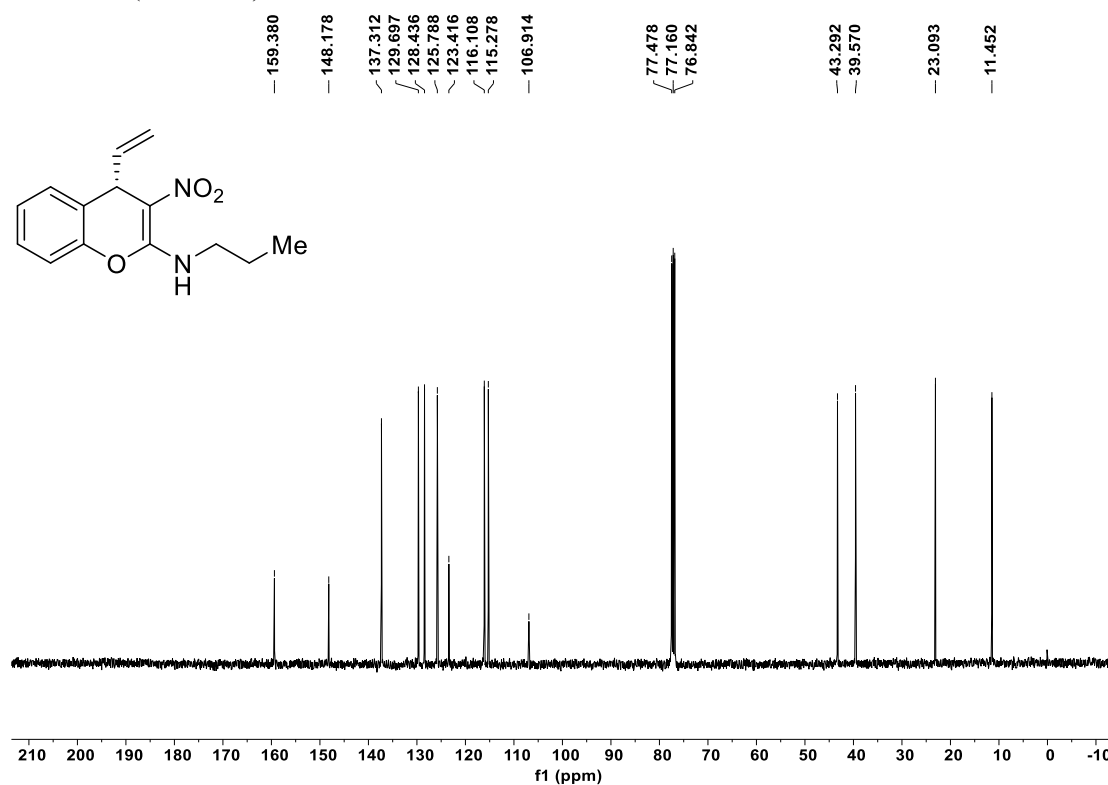

<sup>1</sup>H NMR (400 MHz) of **18** in CDCl<sub>3</sub>

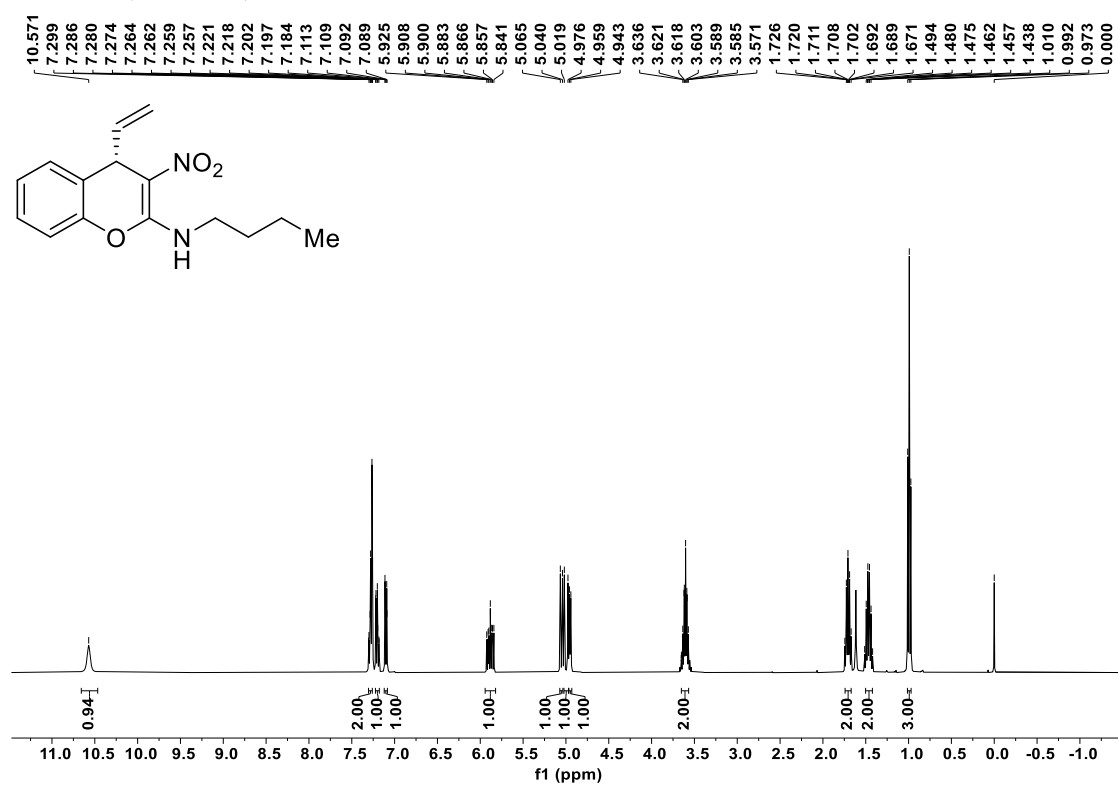

<sup>13</sup>C NMR (100 MHz) of **18** in CDCl<sub>3</sub>

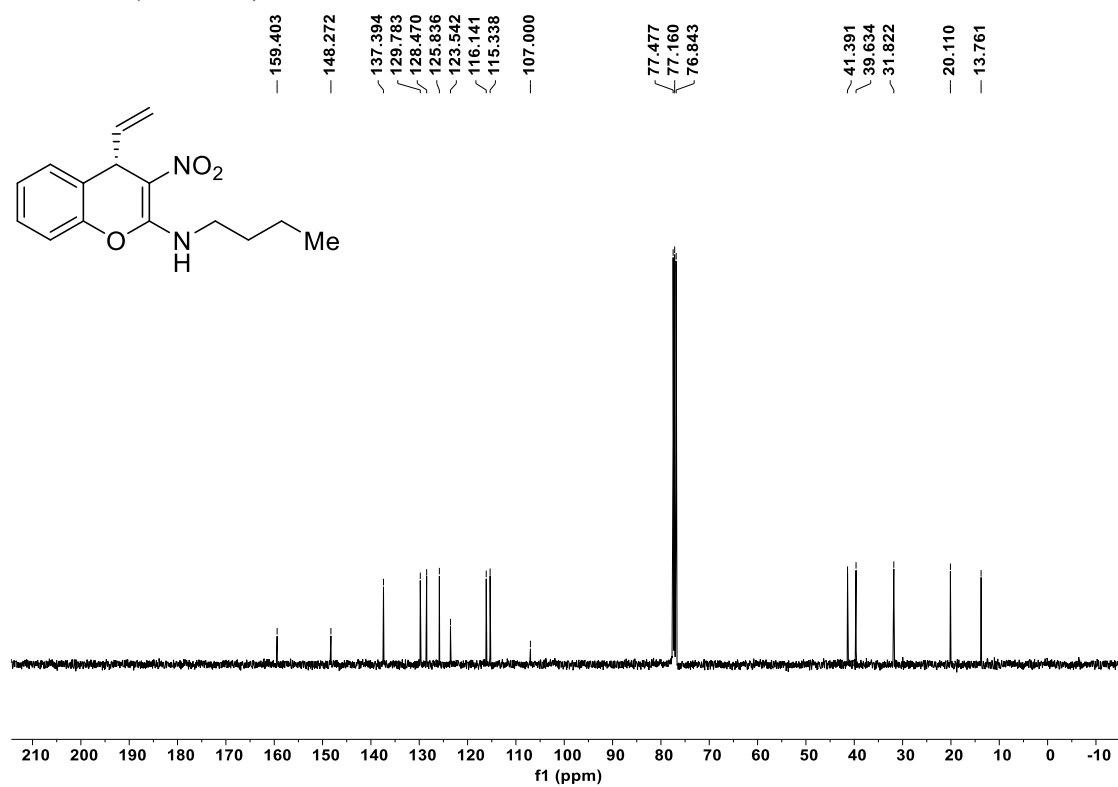

<sup>1</sup>H NMR (400 MHz) of **19** in CDCl<sub>3</sub>

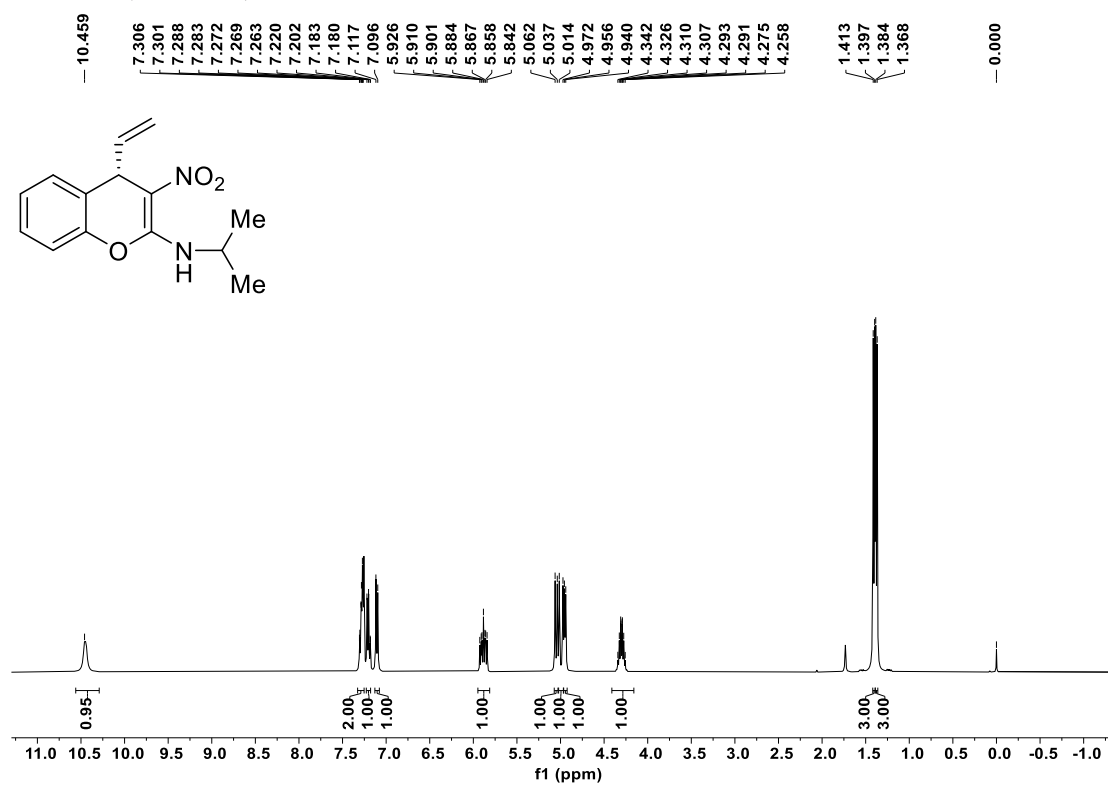

<sup>13</sup>C NMR (100 MHz) of **19** in CDCl<sub>3</sub>

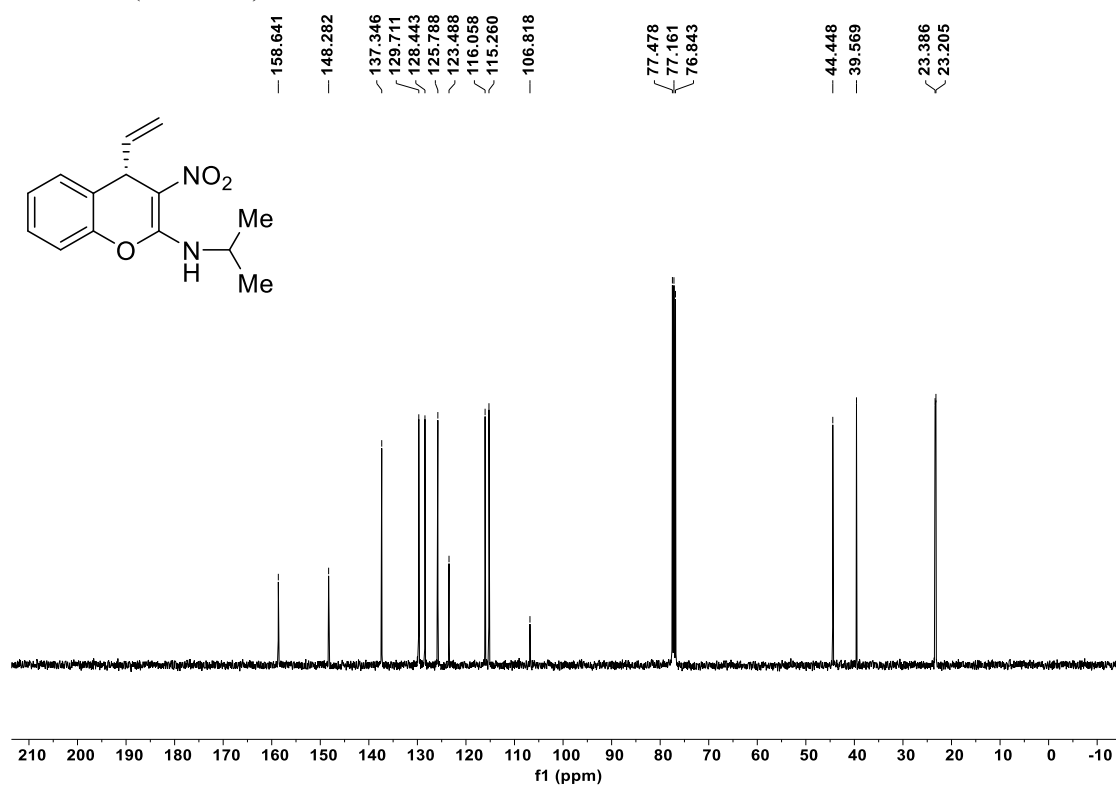



<sup>1</sup>H NMR (400 MHz) of **20** in CDCl<sub>3</sub>

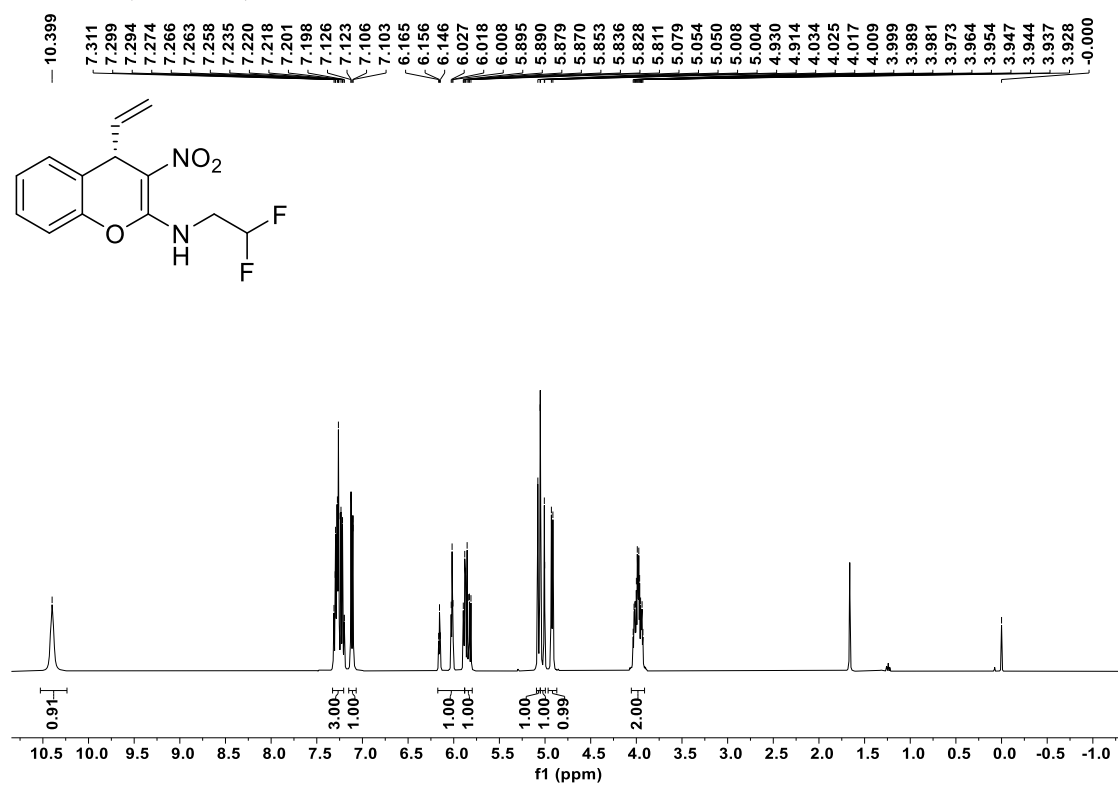

<sup>13</sup>C NMR (100 MHz) of **20** in CDCl<sub>3</sub>

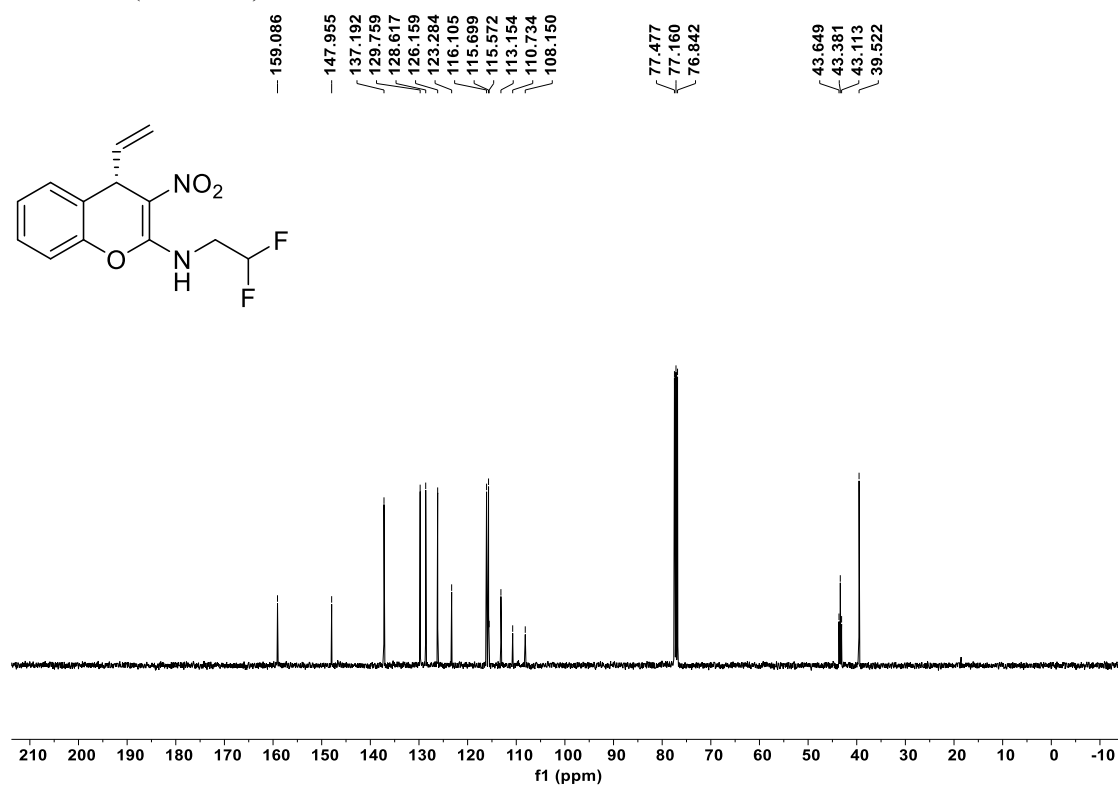

$^{19}\text{F}$  NMR (376 MHz) of **20** in  $\text{CDCl}_3$

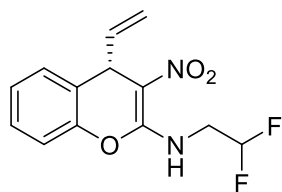

-122.471  
-122.489  
-122.509  
-122.527  
-122.546  
-122.565  
-122.618  
-122.635  
-122.655  
-122.673  
-122.693  
-122.712

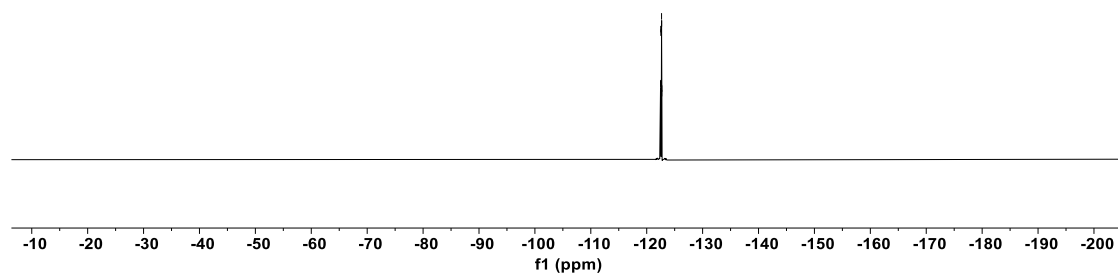

<sup>1</sup>H NMR (400 MHz) of **21** in CDCl<sub>3</sub>

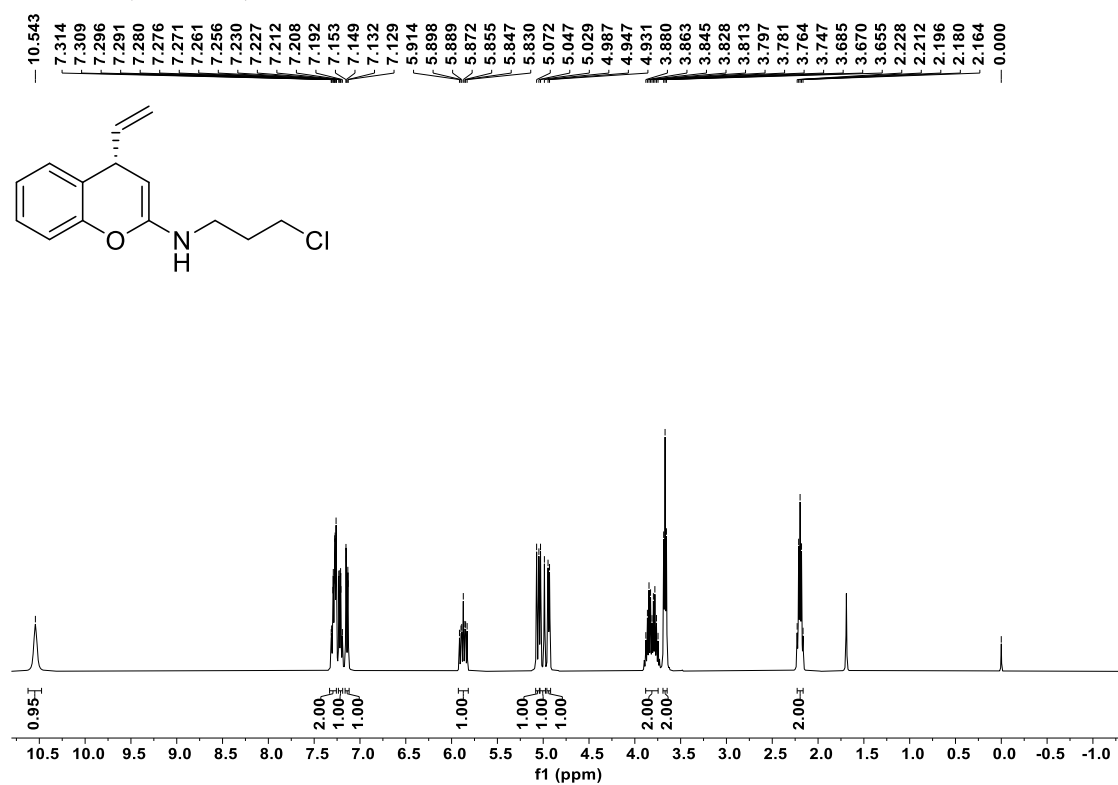

<sup>13</sup>C NMR (100 MHz) of **21** in CDCl<sub>3</sub>

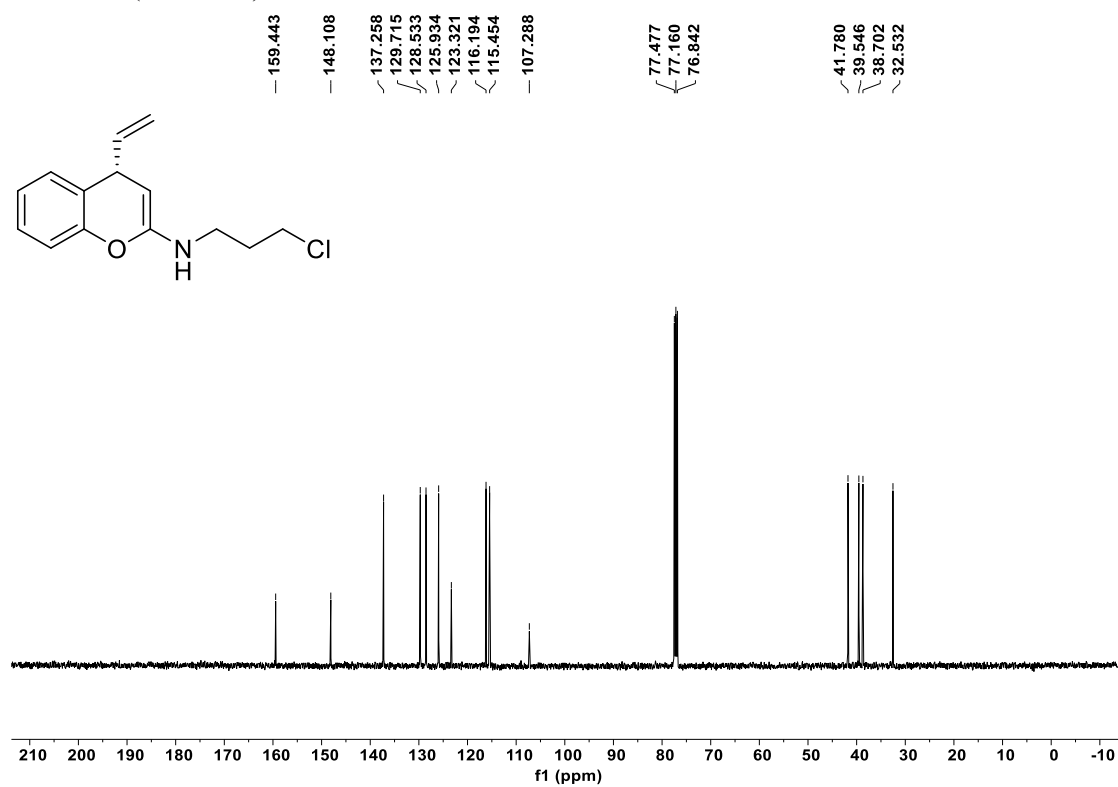

<sup>1</sup>H NMR (400 MHz) of **22** in CDCl<sub>3</sub>

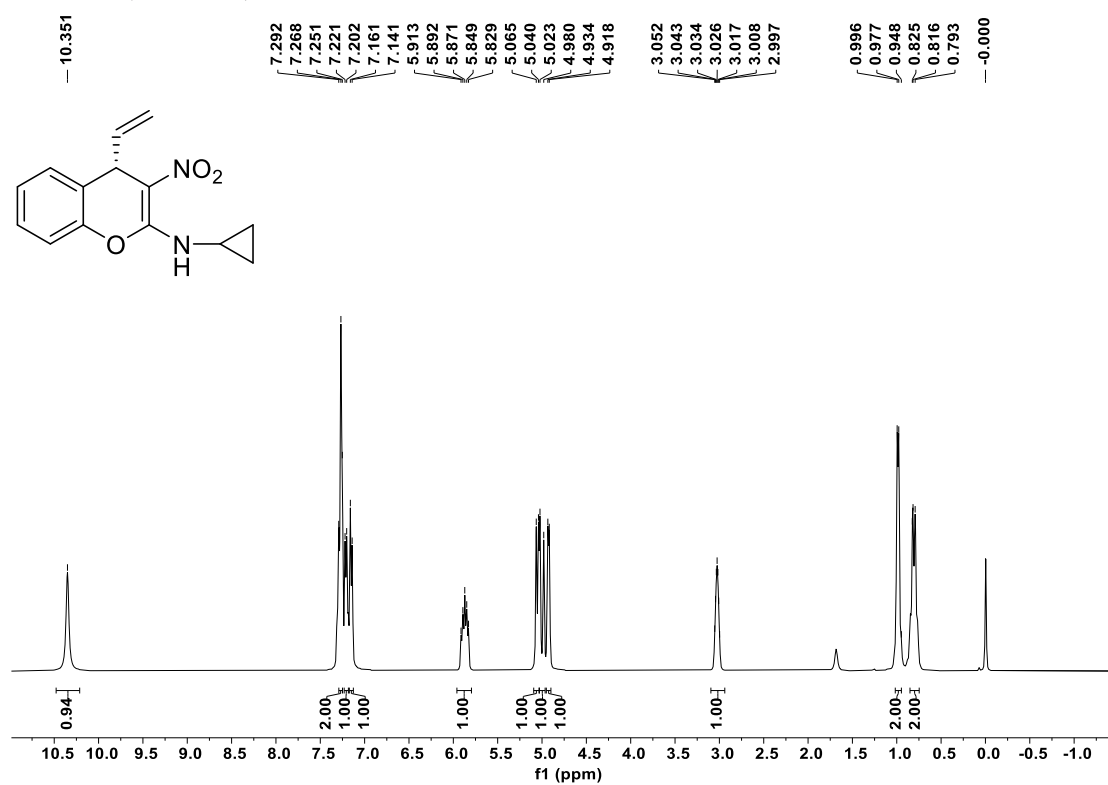

<sup>13</sup>C NMR (100 MHz) of **22** in CDCl<sub>3</sub>

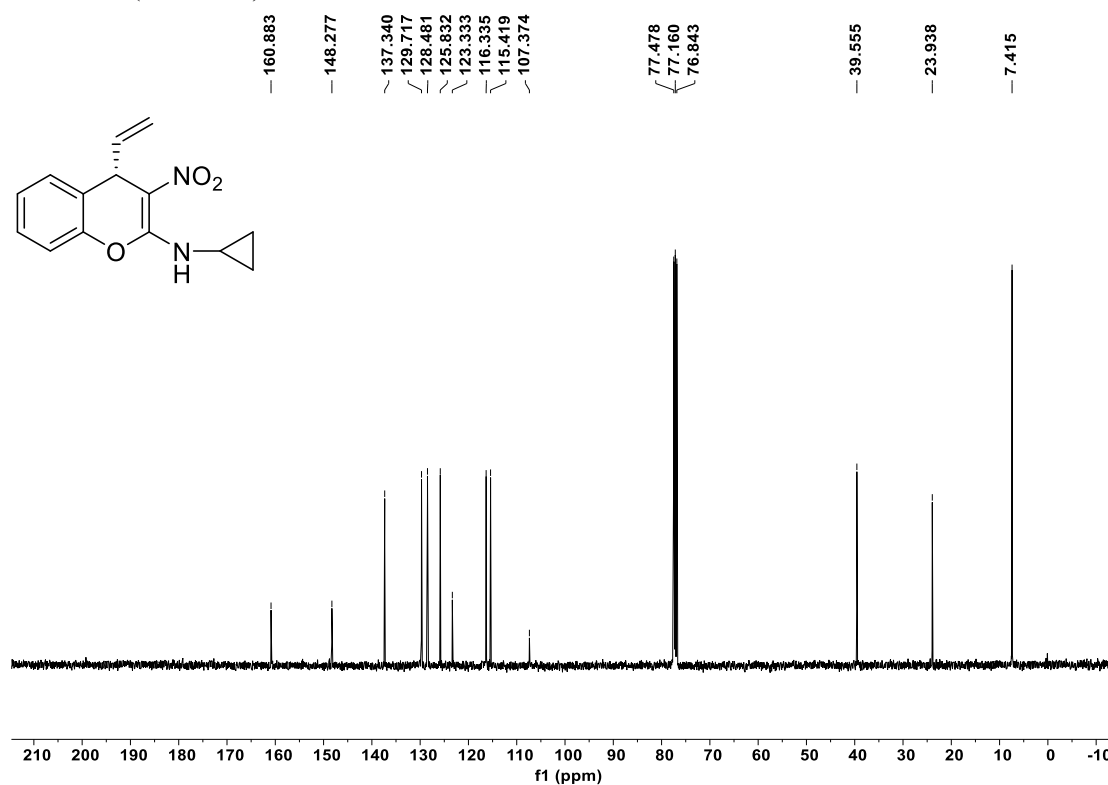

<sup>1</sup>H NMR (400 MHz) of **23** in CDCl<sub>3</sub>

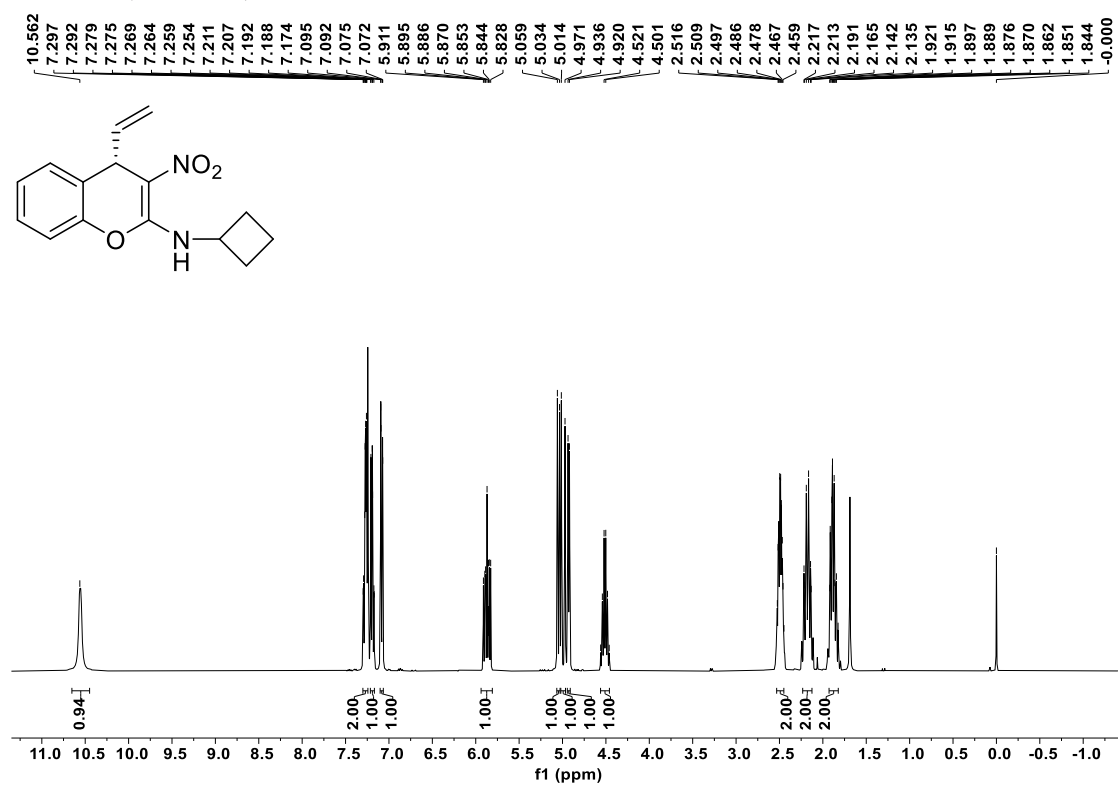

<sup>13</sup>C NMR (100 MHz) of **23** in CDCl<sub>3</sub>

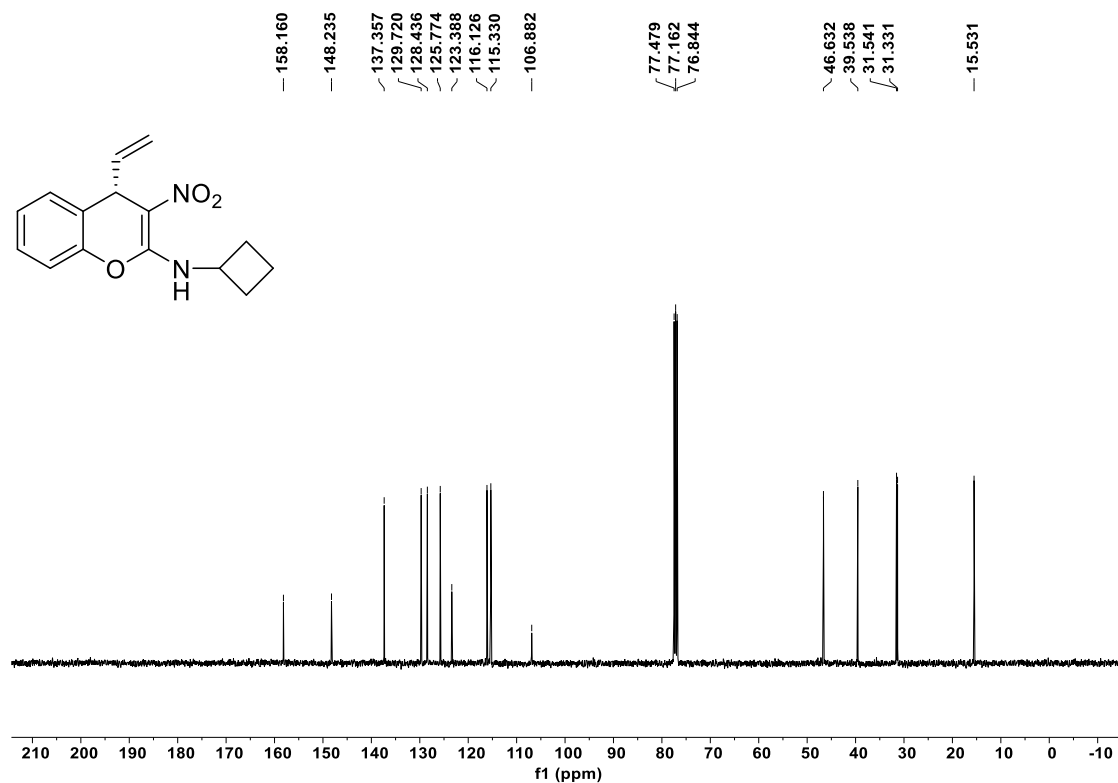

<sup>1</sup>H NMR (400 MHz) of **24** in CDCl<sub>3</sub>

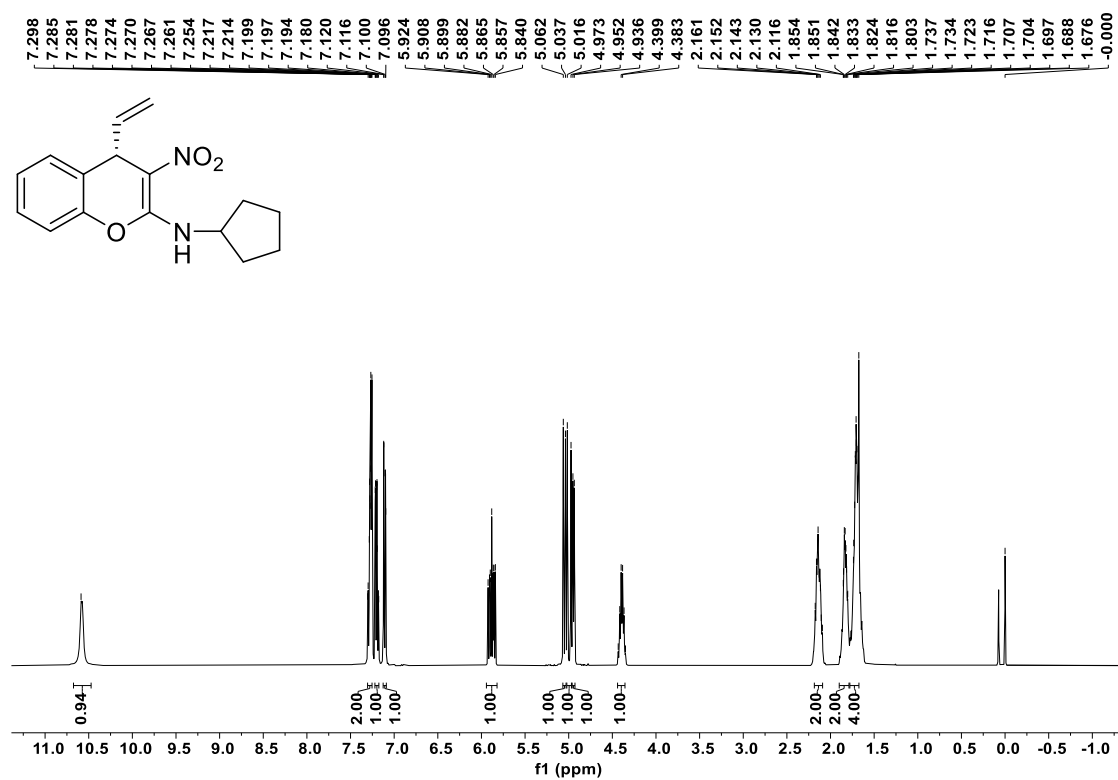

<sup>13</sup>C NMR (100 MHz) of **24** in CDCl<sub>3</sub>

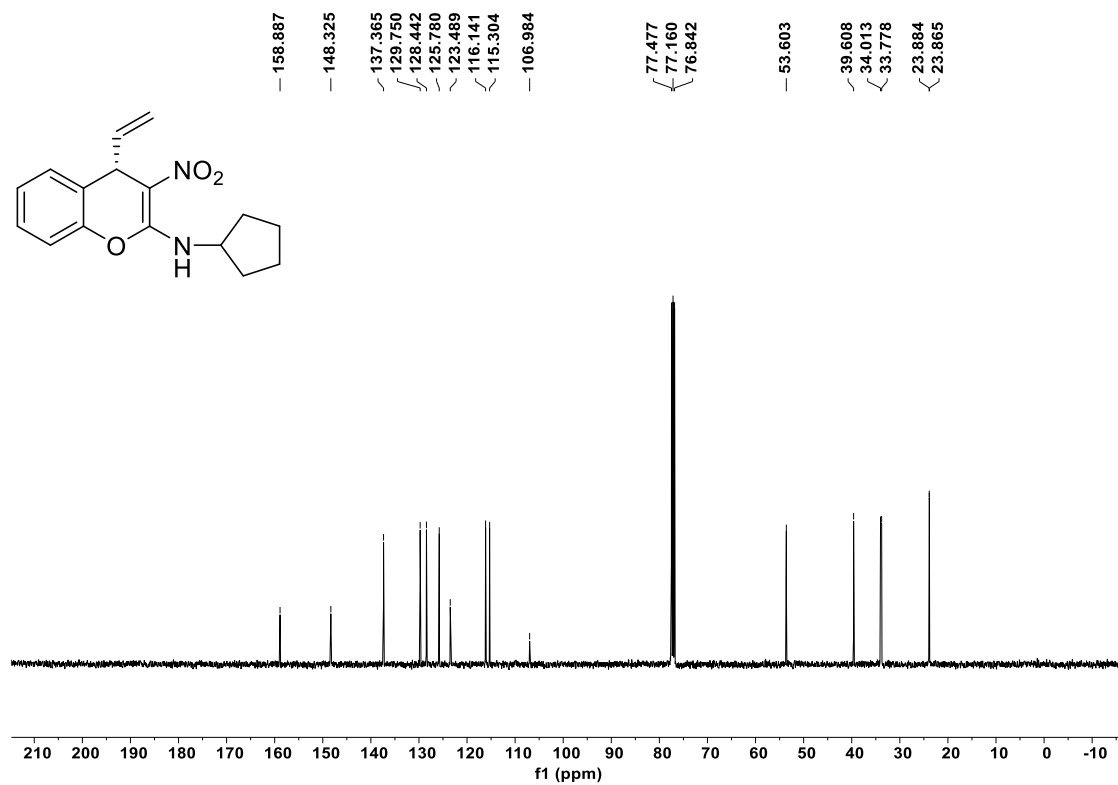

<sup>1</sup>H NMR (400 MHz) of **25** in CDCl<sub>3</sub>

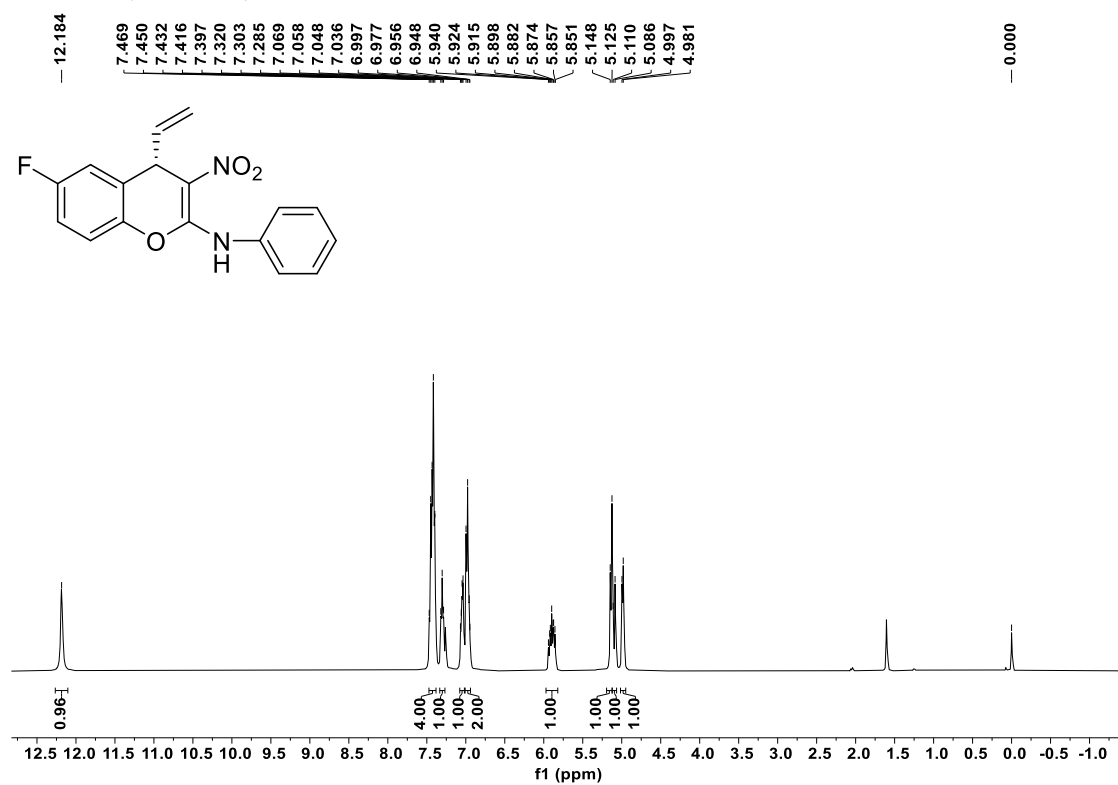

<sup>13</sup>C NMR (100 MHz) of **25** in CDCl<sub>3</sub>

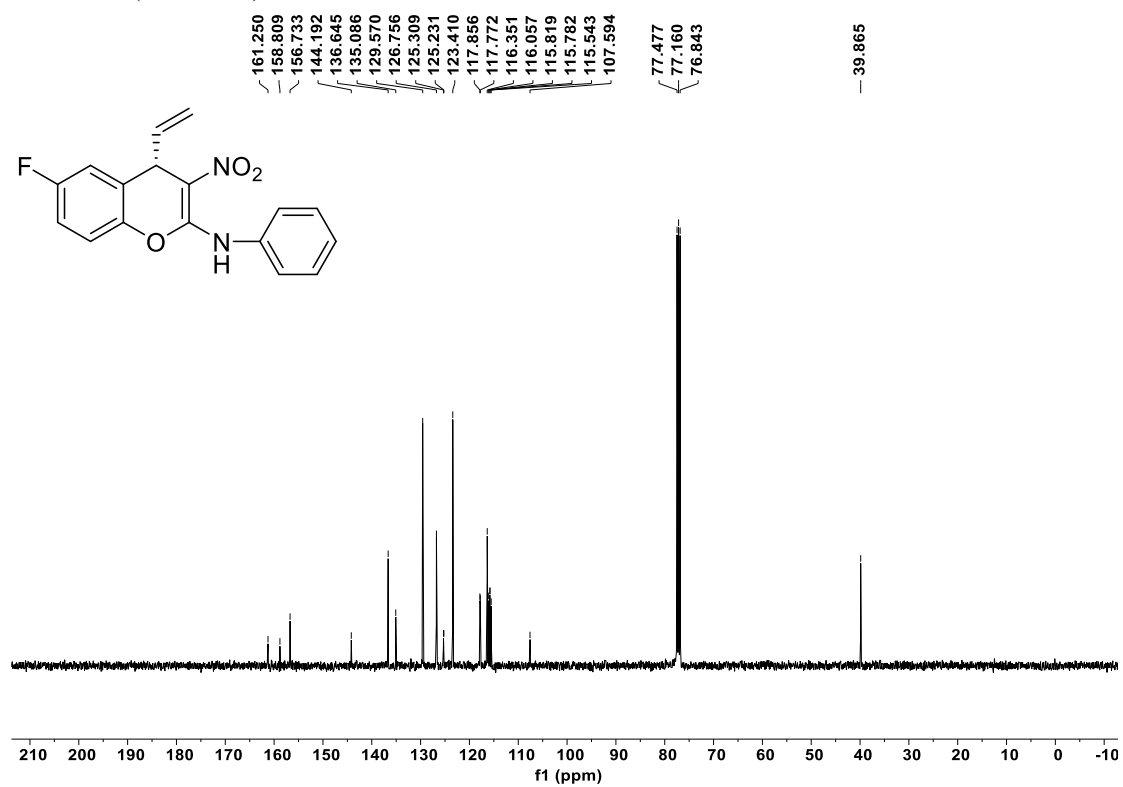

$^{19}\text{F}$  NMR (376 MHz) of **25** in  $\text{CDCl}_3$

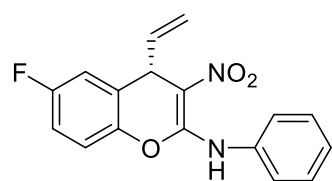

-115.764  
-115.777  
-115.786  
-115.797  
-115.806  
-115.819

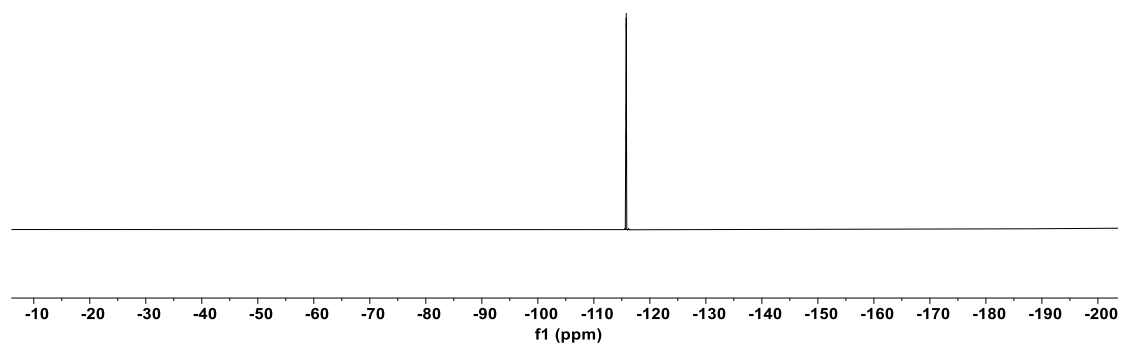



<sup>1</sup>H NMR (400 MHz) of **26** in CDCl<sub>3</sub>

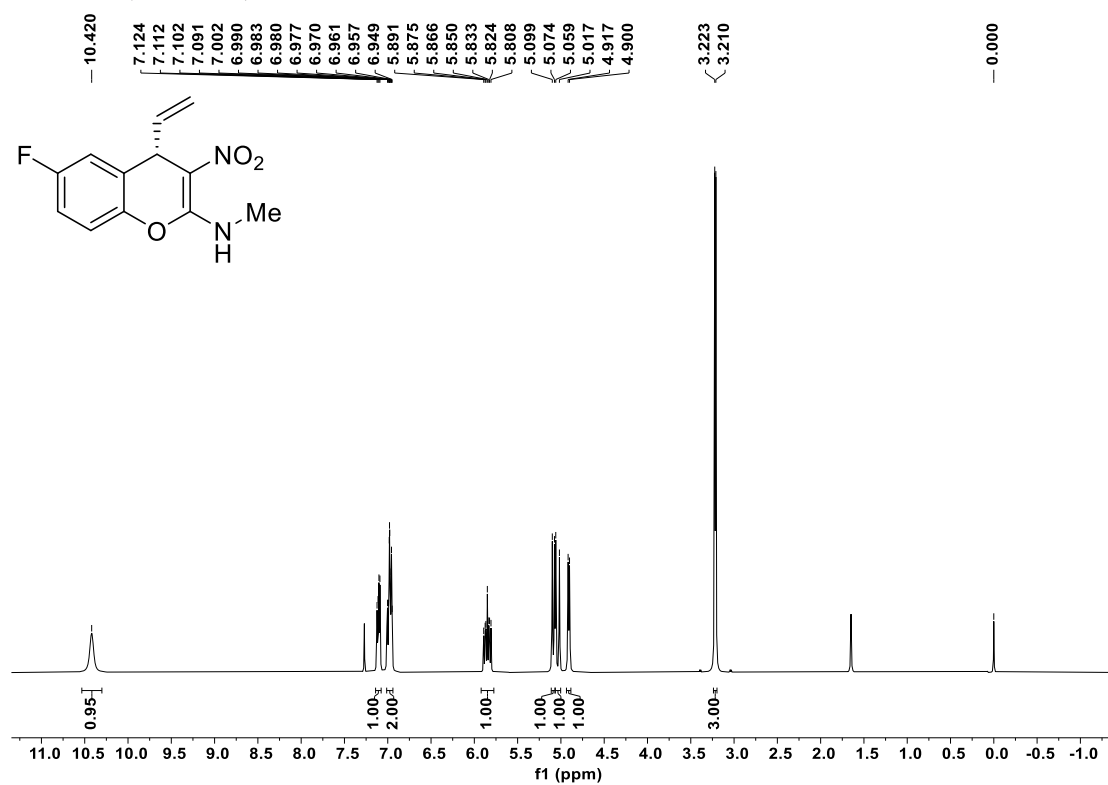

<sup>13</sup>C NMR (100 MHz) of **26** in CDCl<sub>3</sub>

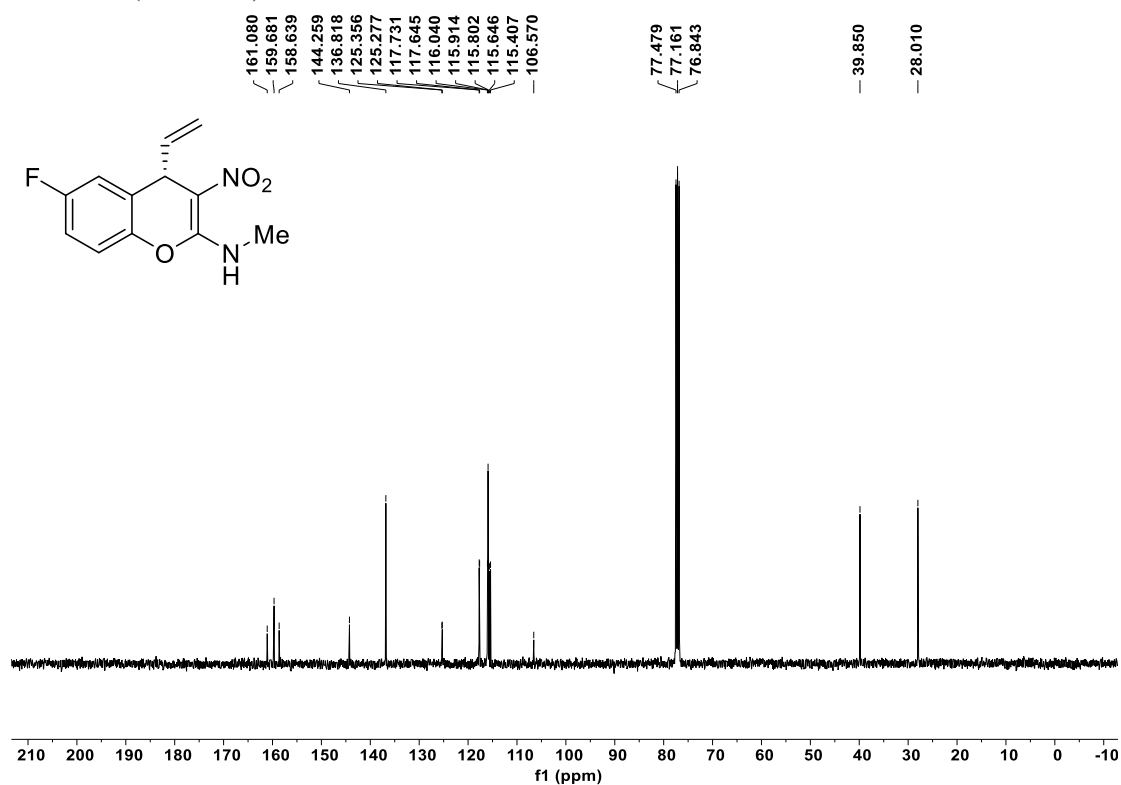

$^{19}\text{F}$  NMR (376 MHz) of **26** in  $\text{CDCl}_3$

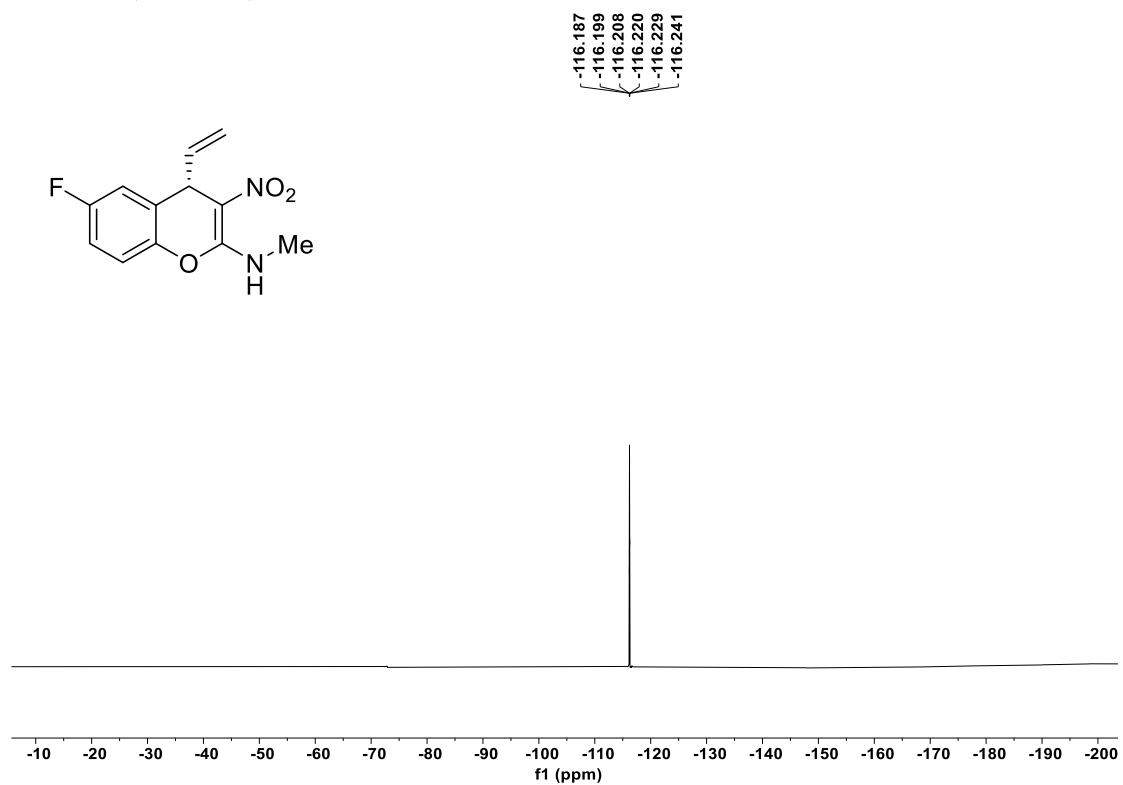

<sup>1</sup>H NMR (400 MHz) of **27** in CDCl<sub>3</sub>

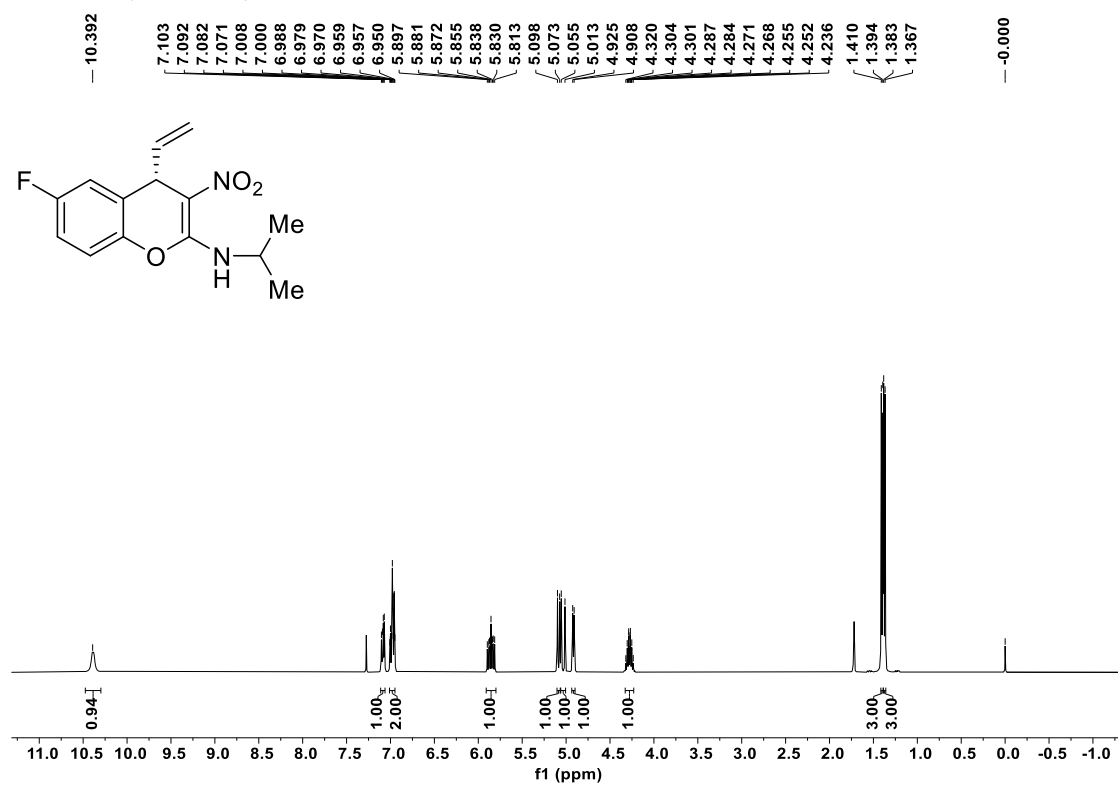

<sup>13</sup>C NMR (100 MHz) of **27** in CDCl<sub>3</sub>

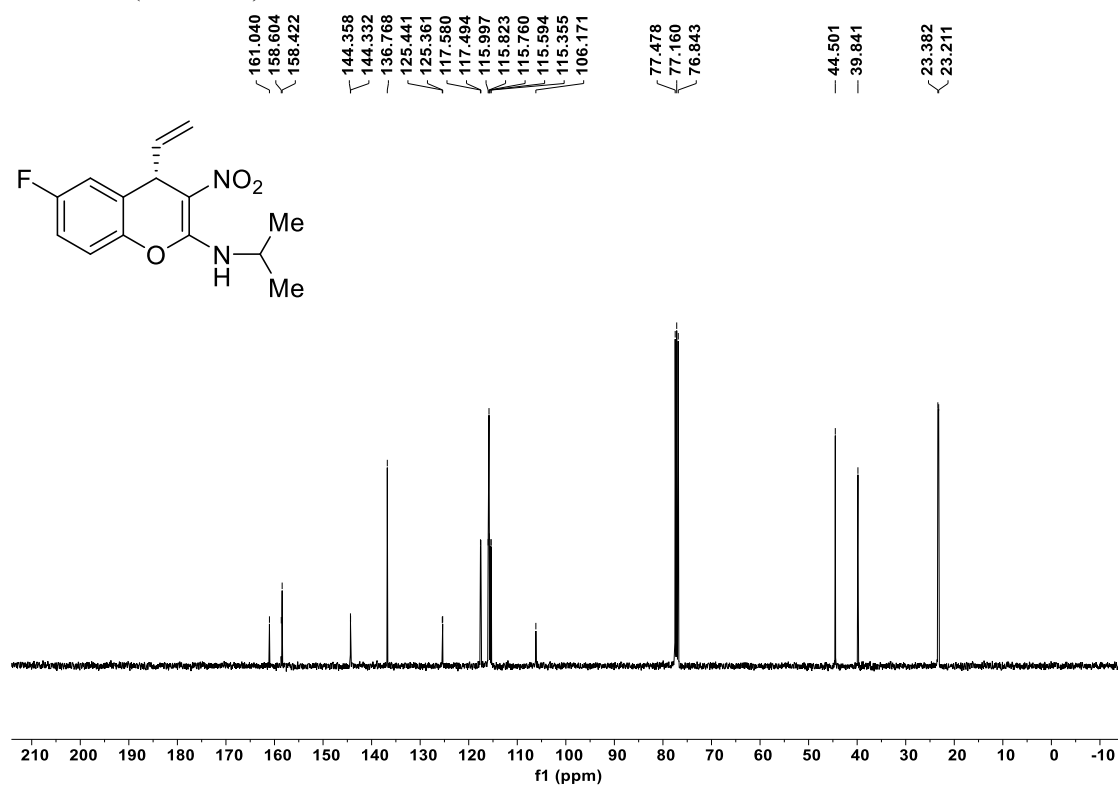

$^{19}\text{F}$  NMR (376 MHz) of **27** in  $\text{CDCl}_3$

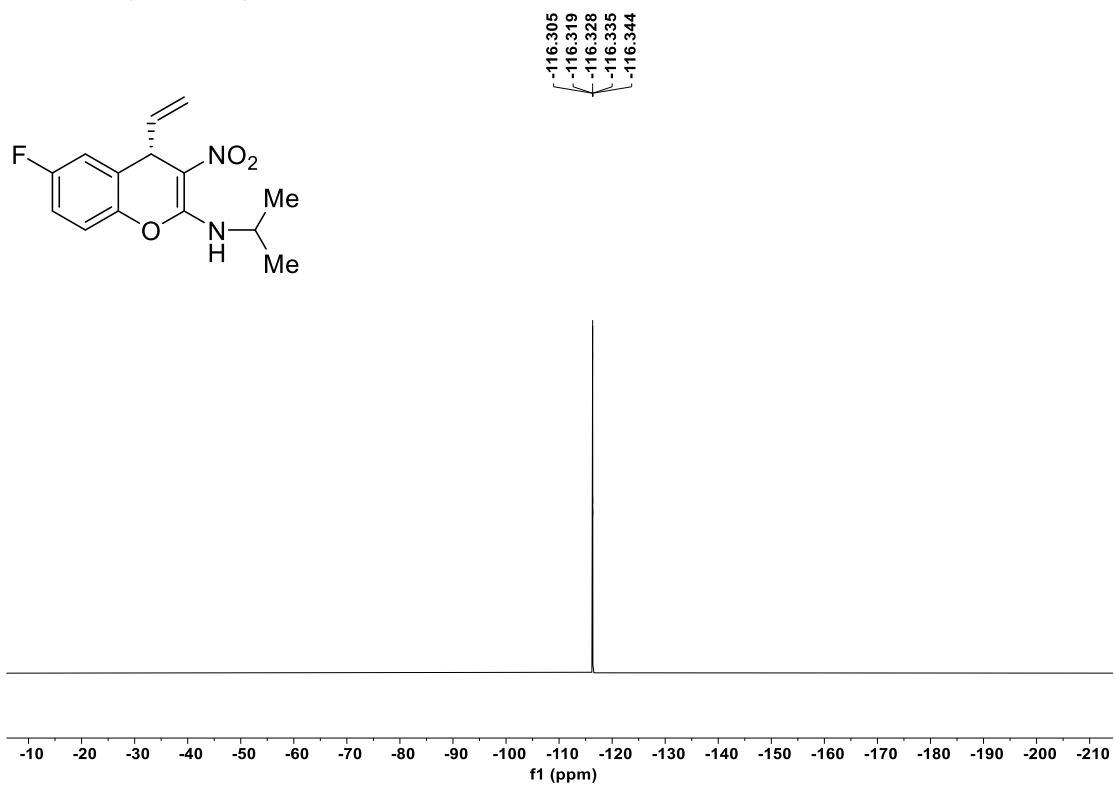

$^1\text{H}$  NMR (400 MHz) of **28** in  $\text{CDCl}_3$

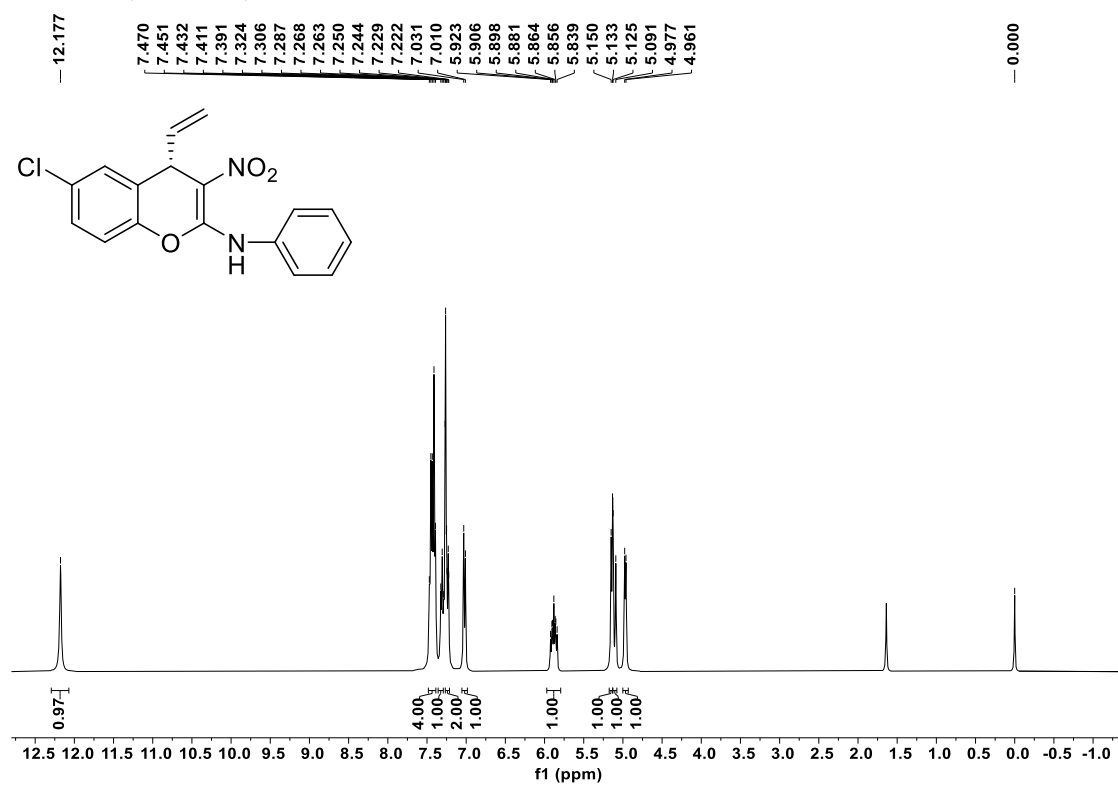

$^{13}\text{C}$  NMR (100 MHz) of **28** in  $\text{CDCl}_3$

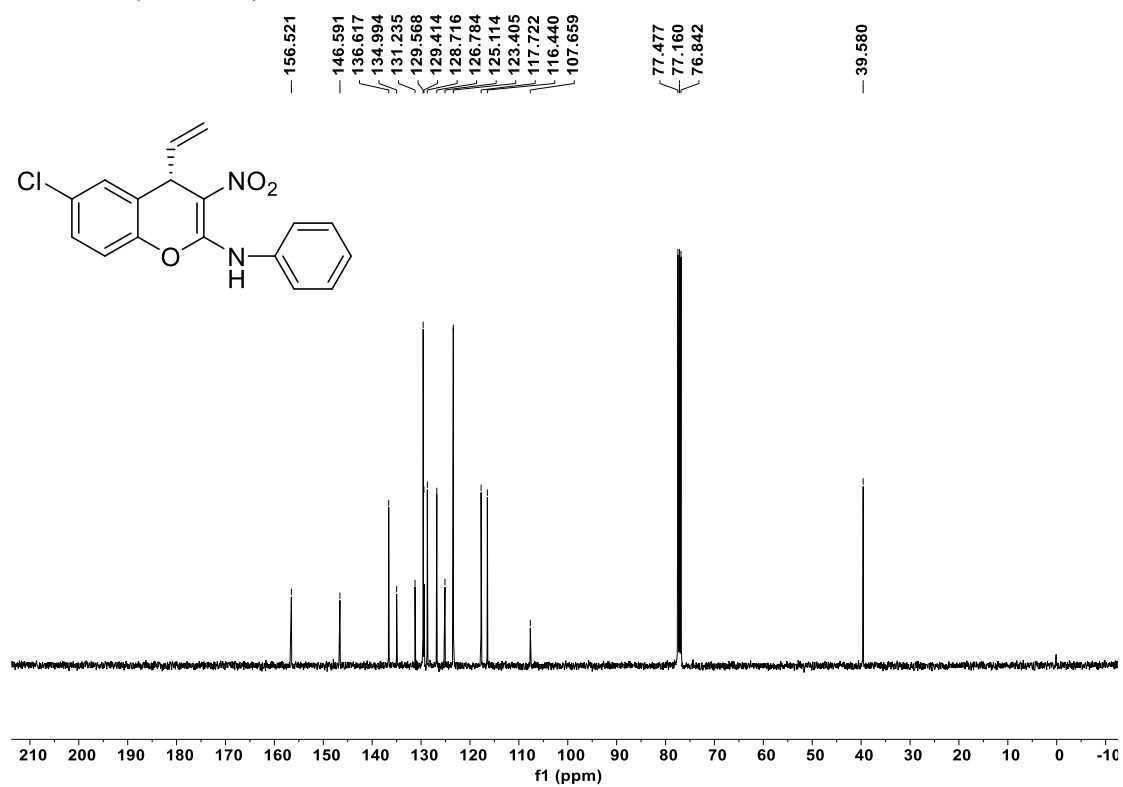

$^1\text{H}$  NMR (400 MHz) of **29** in  $\text{CDCl}_3$

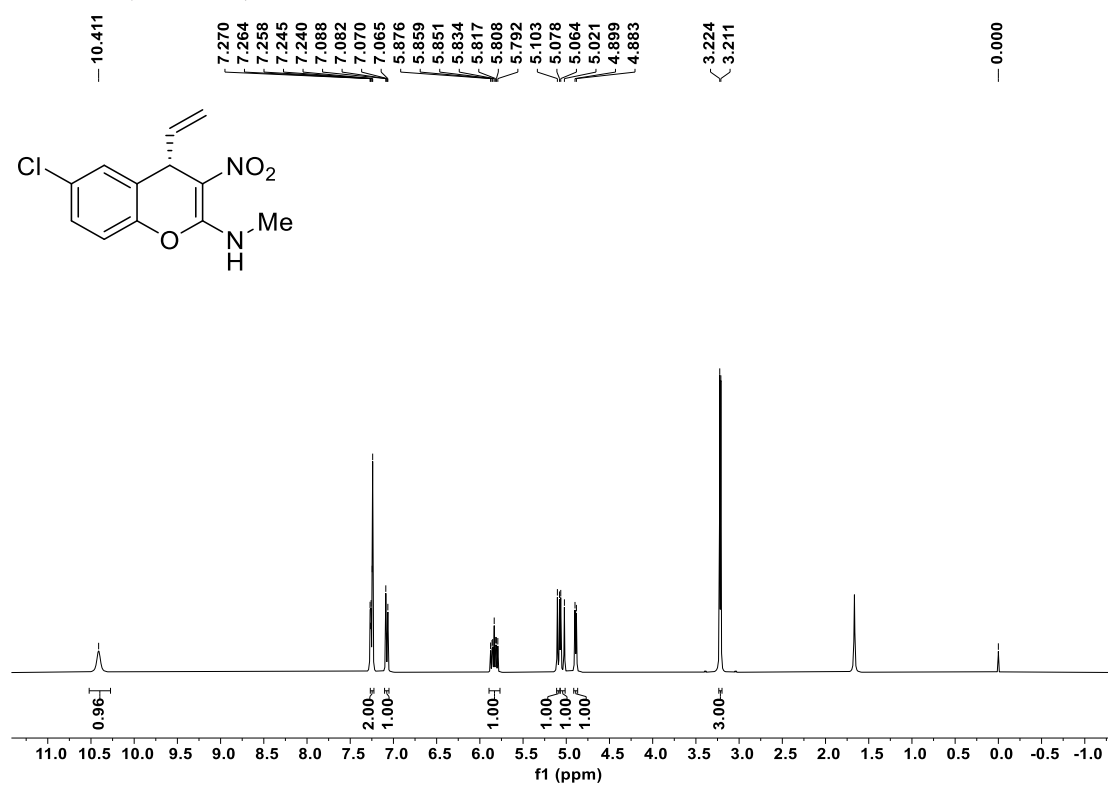

$^{13}\text{C}$  NMR (100 MHz) of **29** in  $\text{CDCl}_3$

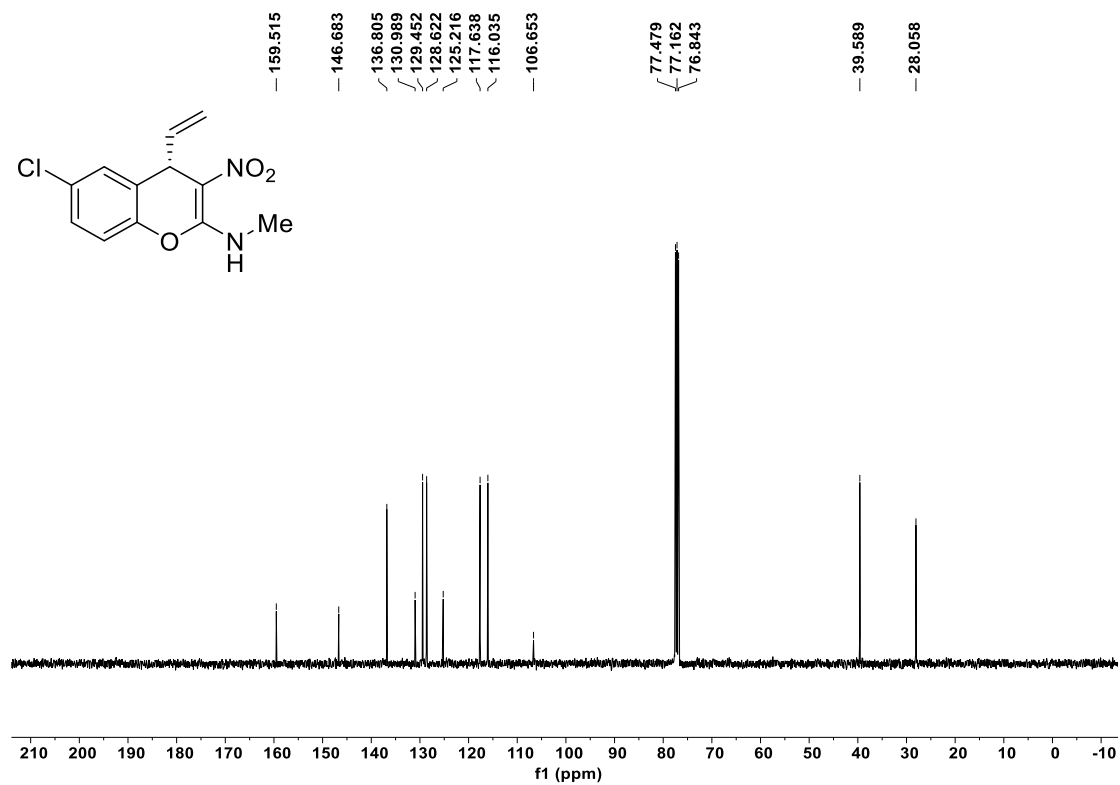

<sup>1</sup>H NMR (400 MHz) of **30** in CDCl<sub>3</sub>

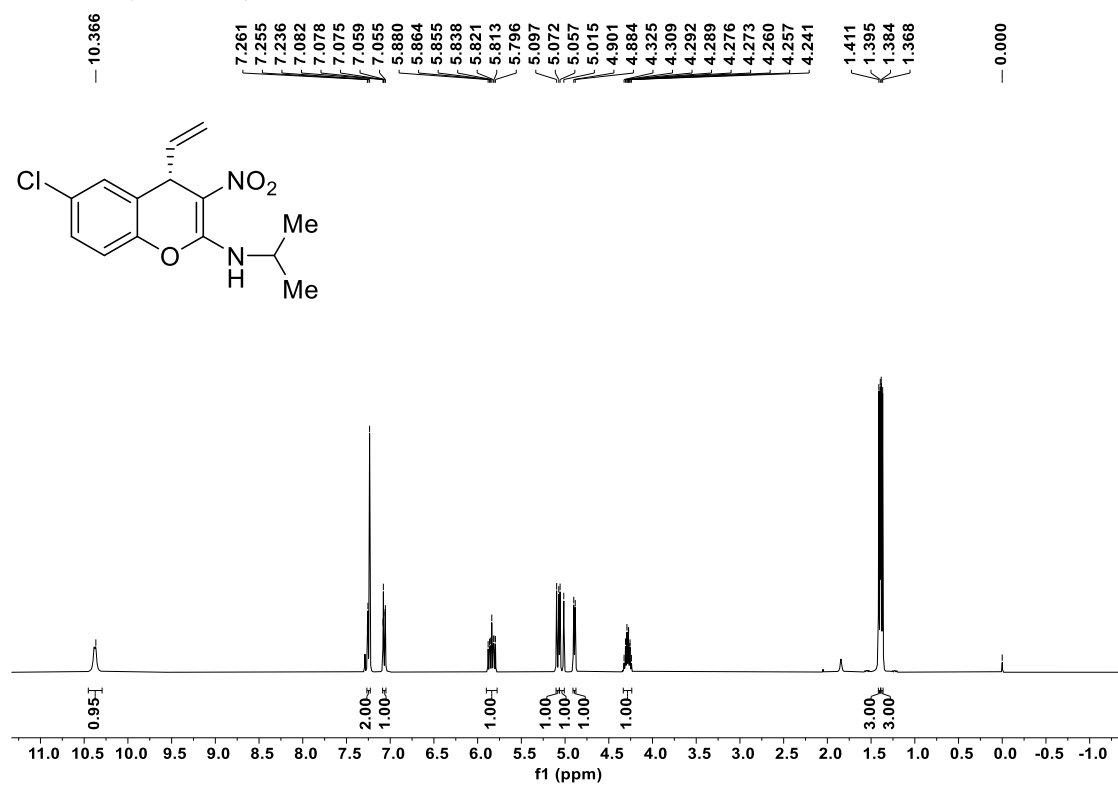

<sup>13</sup>C NMR (100 MHz) of **30** in CDCl<sub>3</sub>

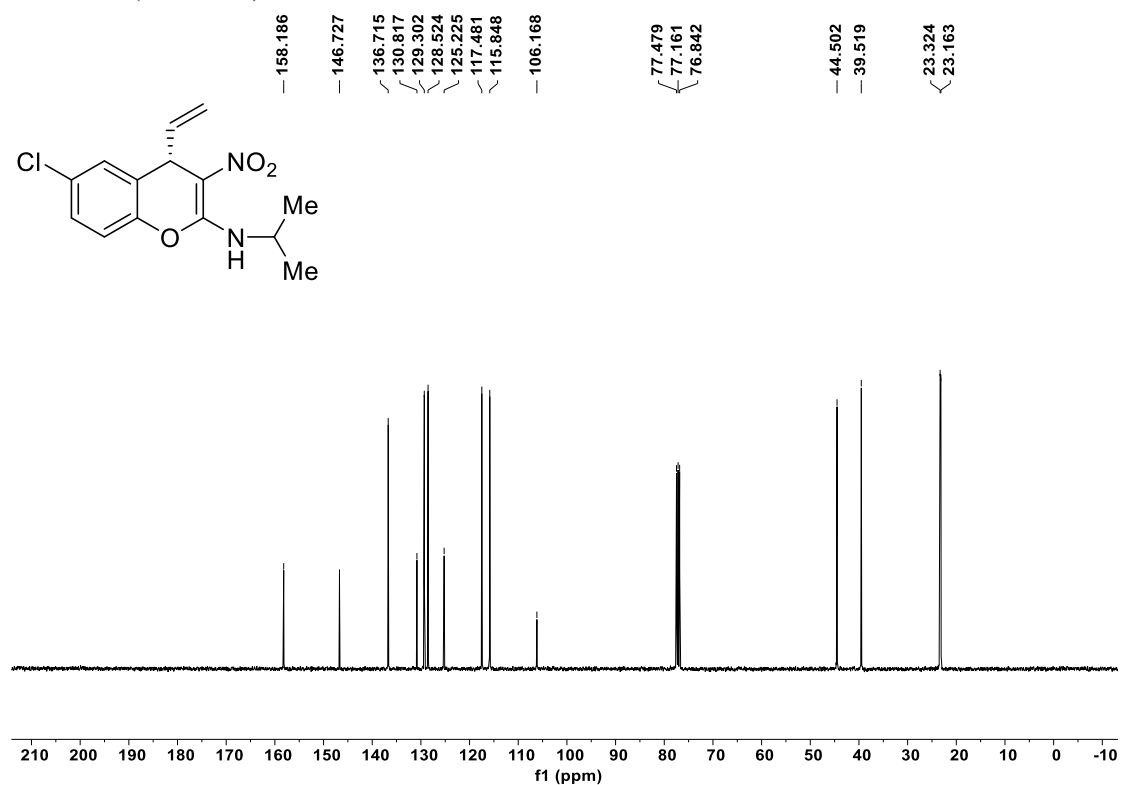

<sup>1</sup>H NMR (400 MHz) of **31** in CDCl<sub>3</sub>

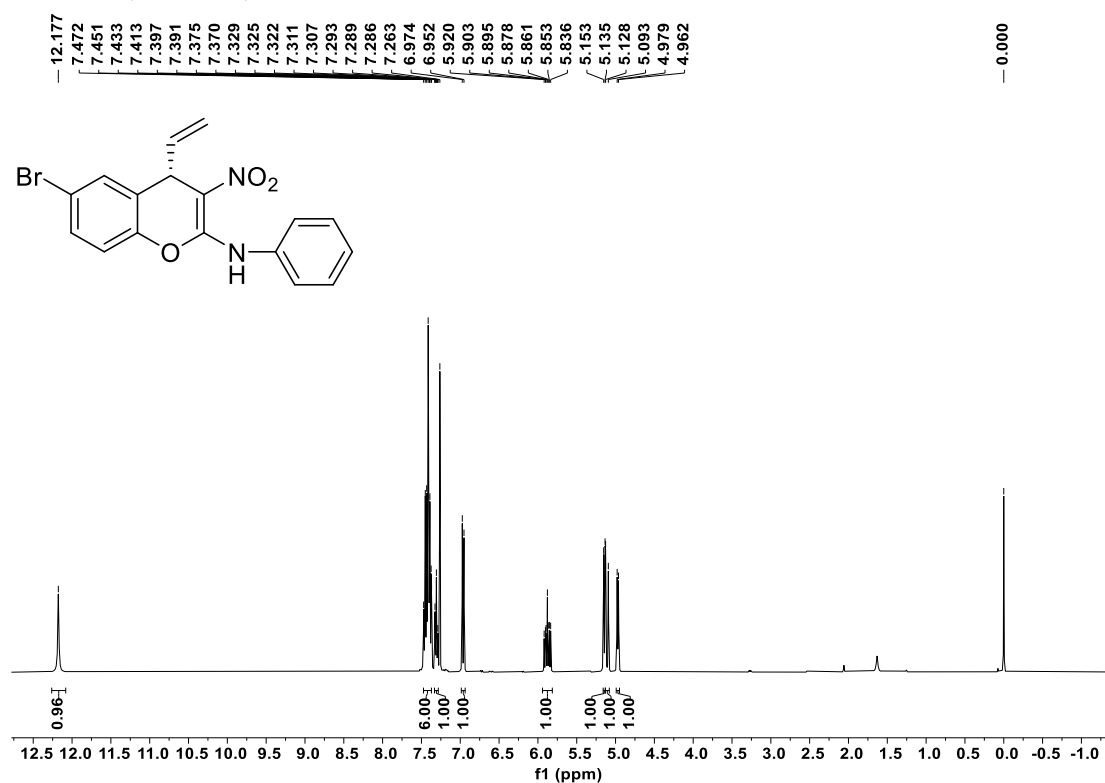

<sup>13</sup>C NMR (100 MHz) of **31** in CDCl<sub>3</sub>

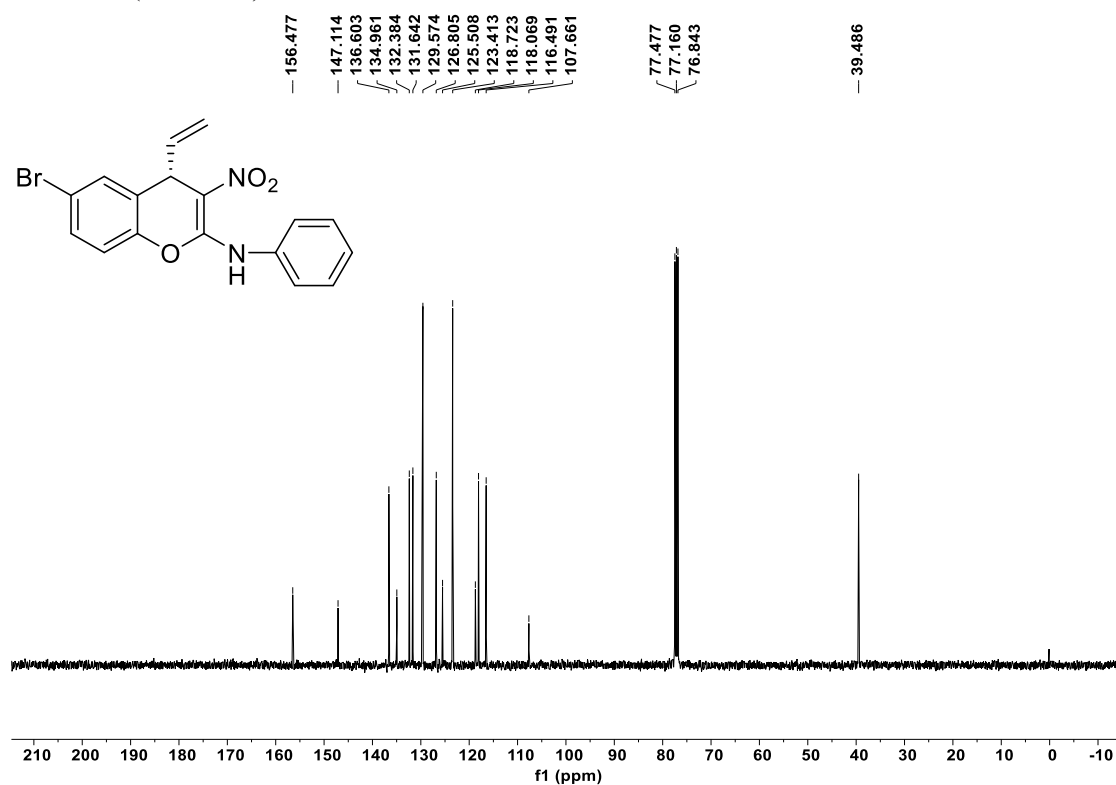



<sup>1</sup>H NMR (400 MHz) of **32** in CDCl<sub>3</sub>

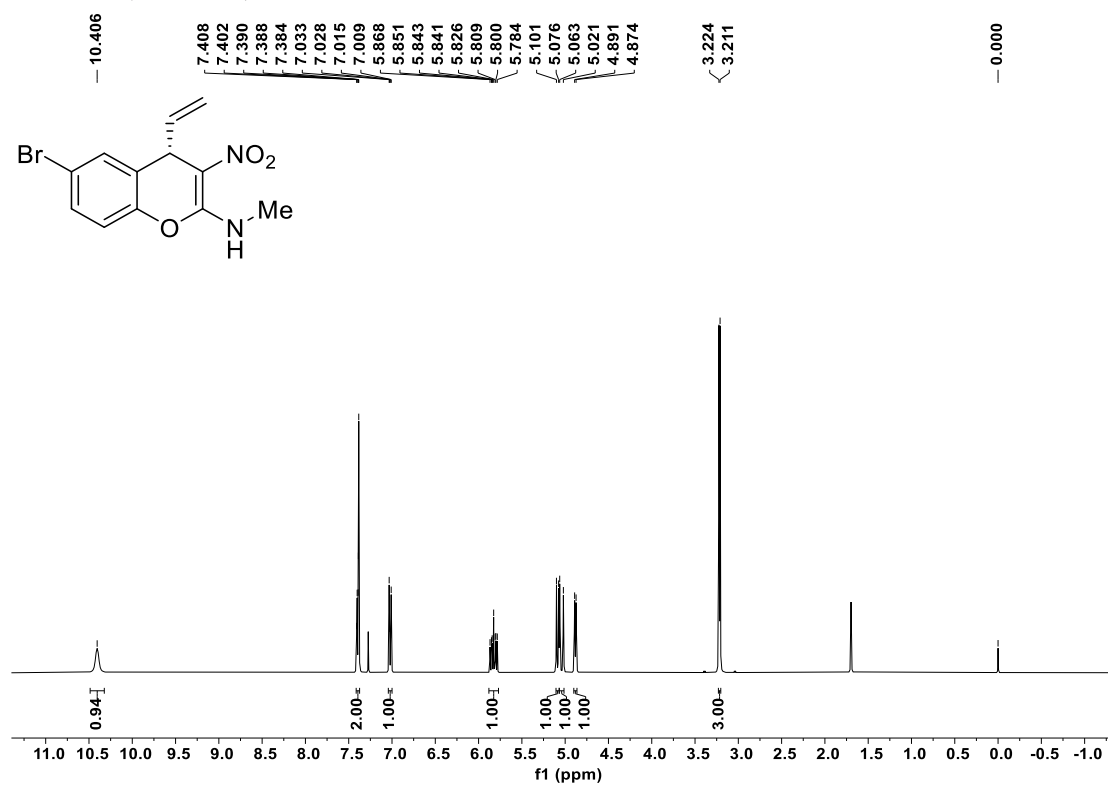

<sup>13</sup>C NMR (100 MHz) of **32** in CDCl<sub>3</sub>

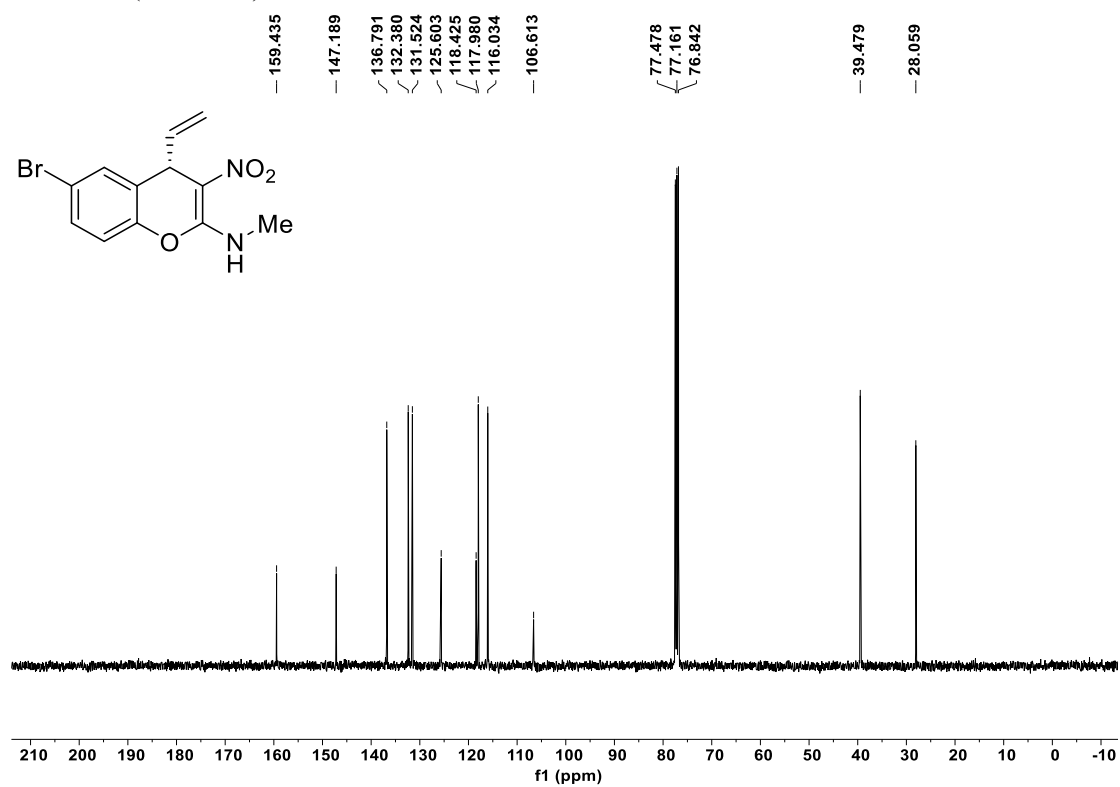

<sup>1</sup>H NMR (400 MHz) of **33** in CDCl<sub>3</sub>

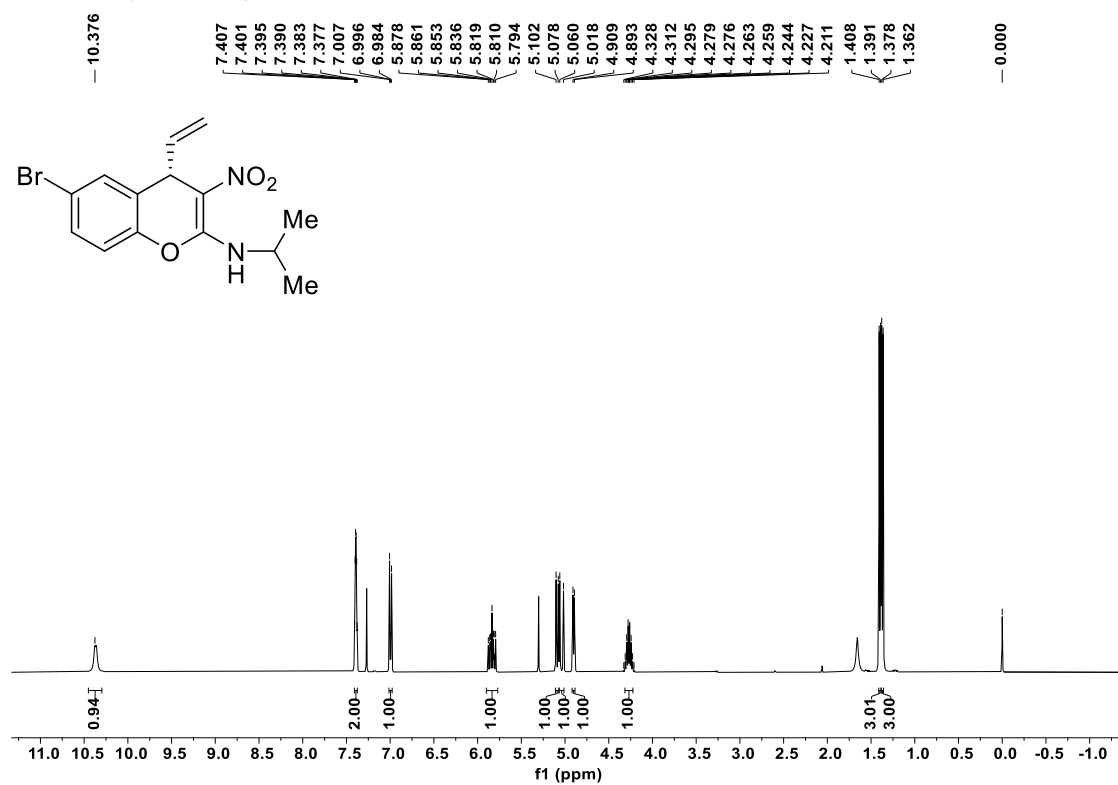

<sup>13</sup>C NMR (100 MHz) of **33** in CDCl<sub>3</sub>

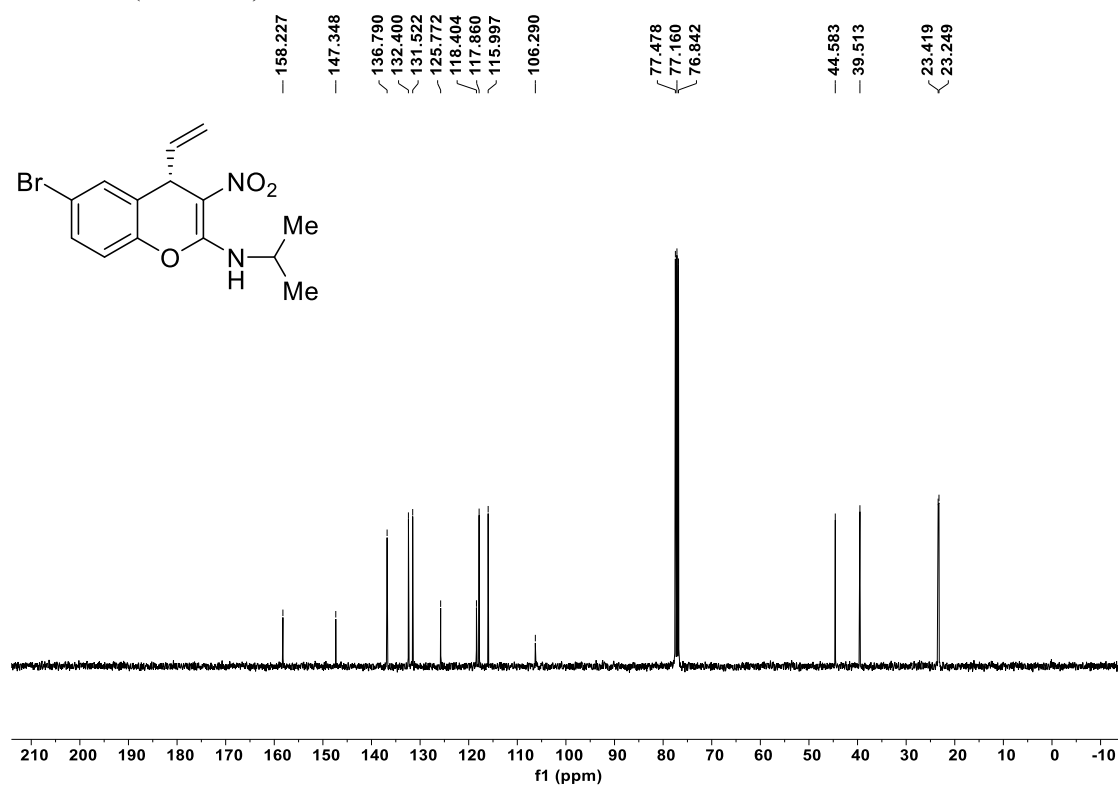

<sup>1</sup>H NMR (400 MHz) of **34** in CDCl<sub>3</sub>

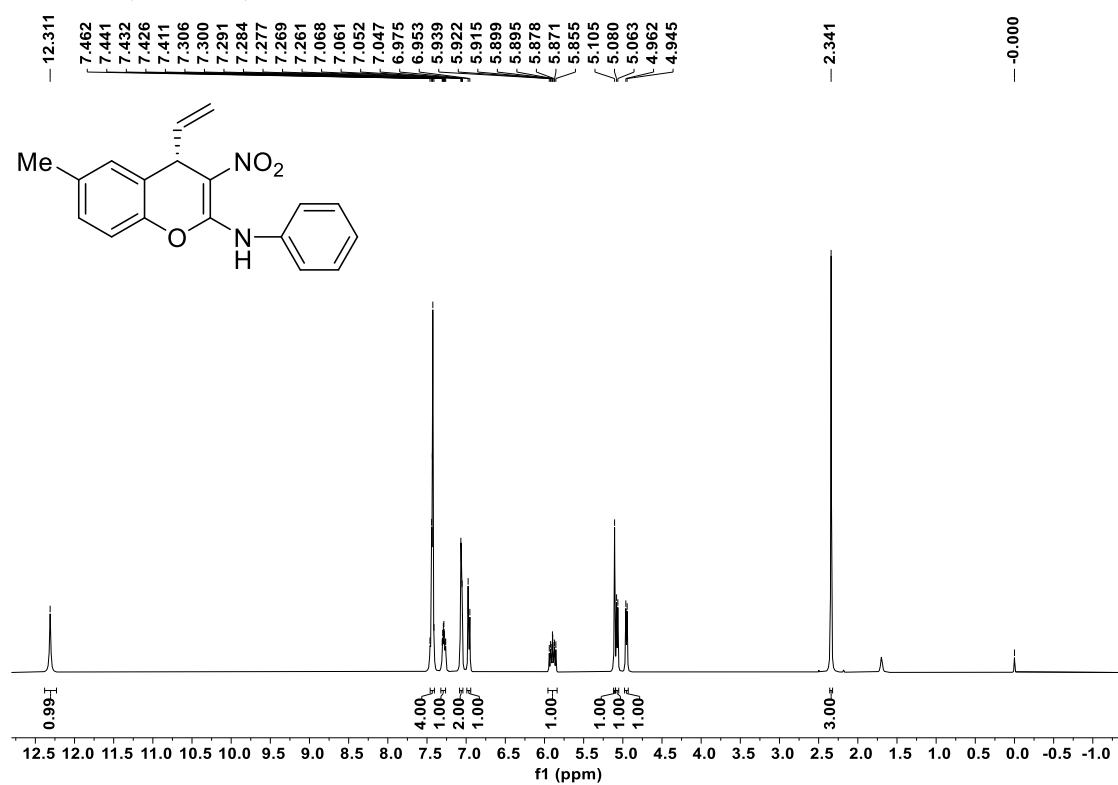

<sup>13</sup>C NMR (100 MHz) of **34** in CDCl<sub>3</sub>

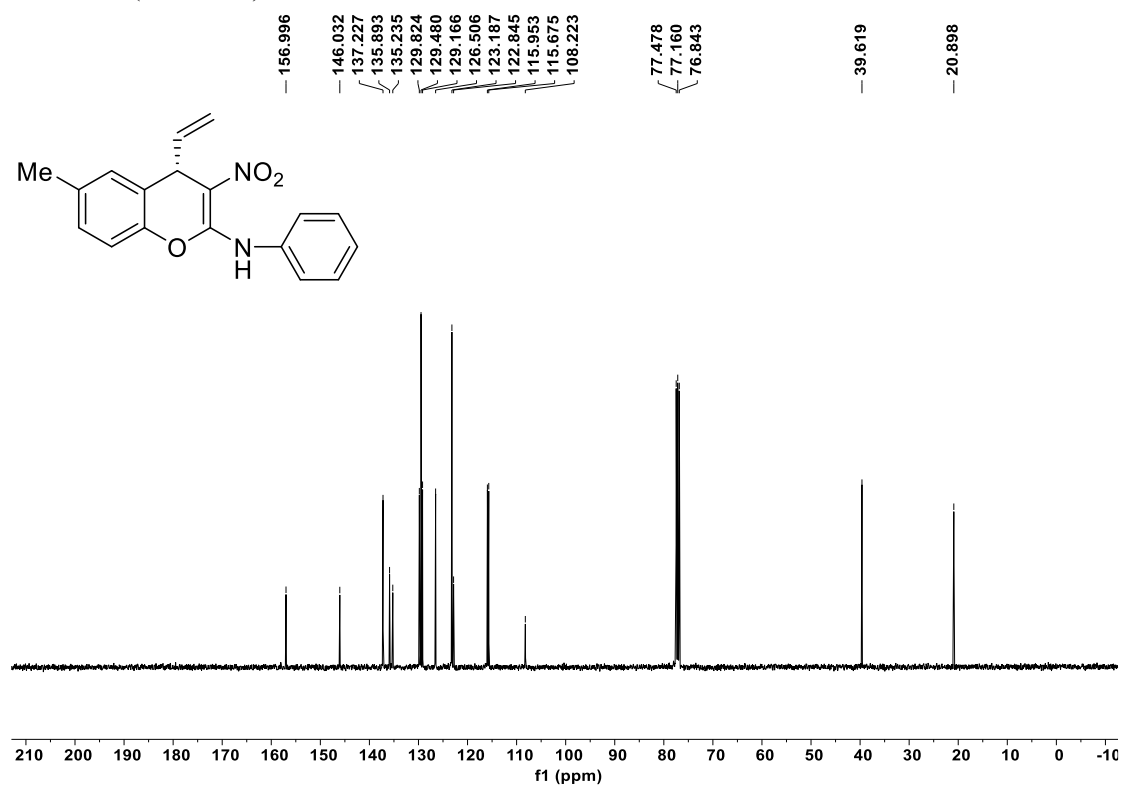

$^1\text{H}$  NMR (400 MHz) of **35** in  $\text{CDCl}_3$

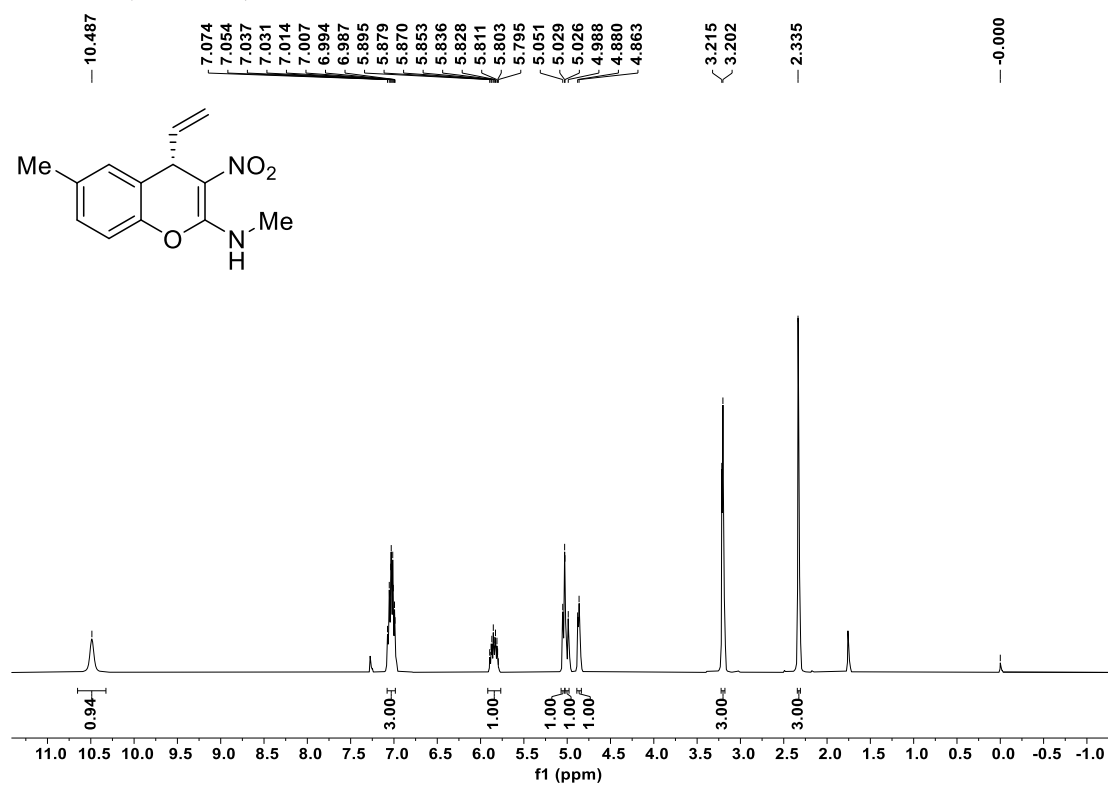

$^{13}\text{C}$  NMR (100 MHz) of **35** in  $\text{CDCl}_3$

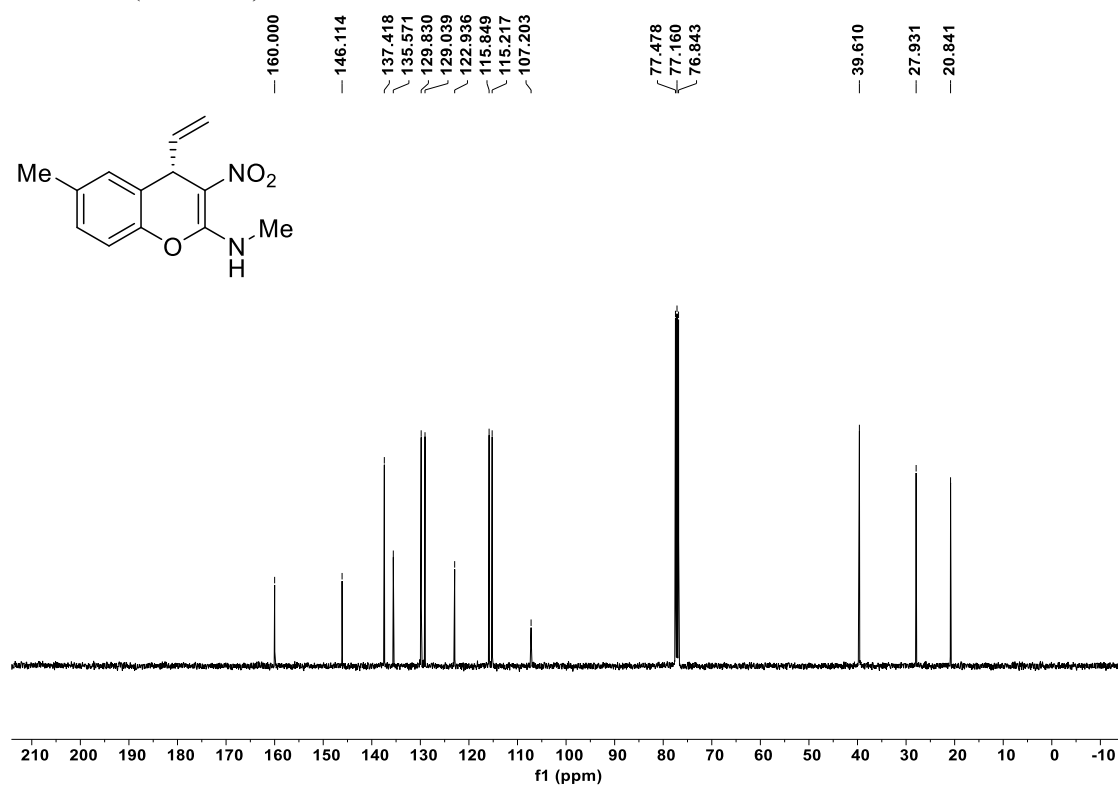

$^1\text{H}$  NMR (400 MHz) of **36** in  $\text{CDCl}_3$

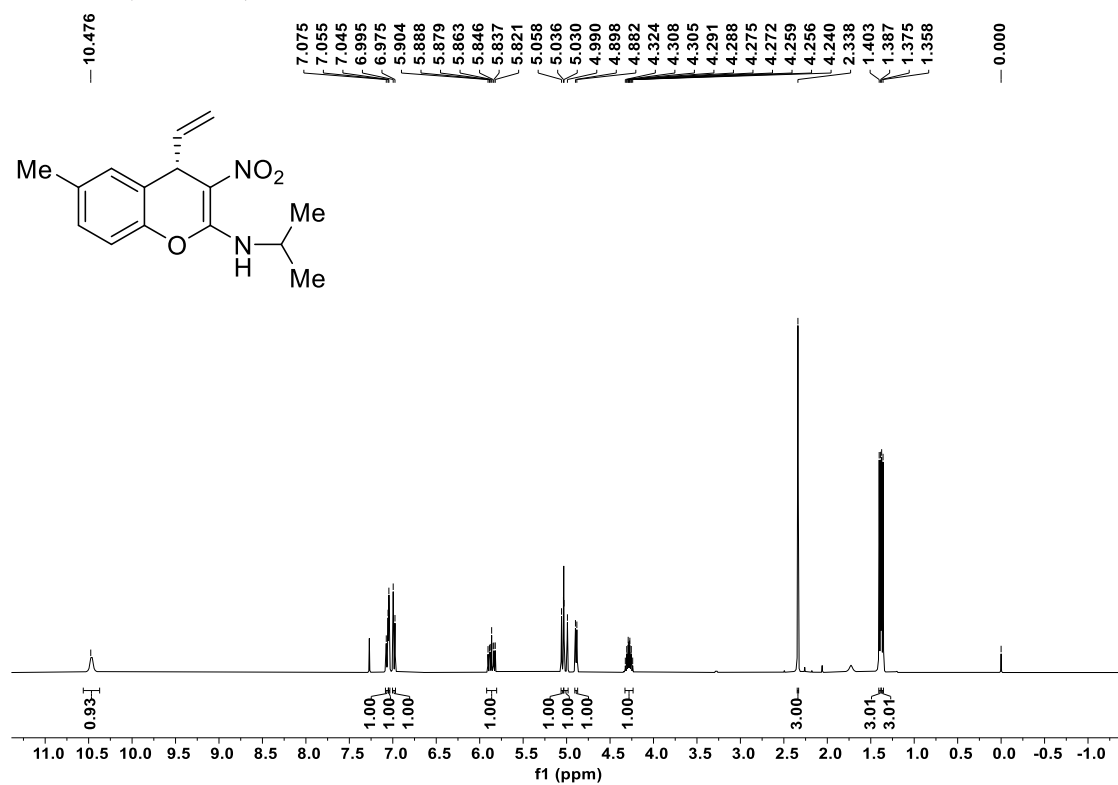

$^{13}\text{C}$  NMR (100 MHz) of **36** in  $\text{CDCl}_3$

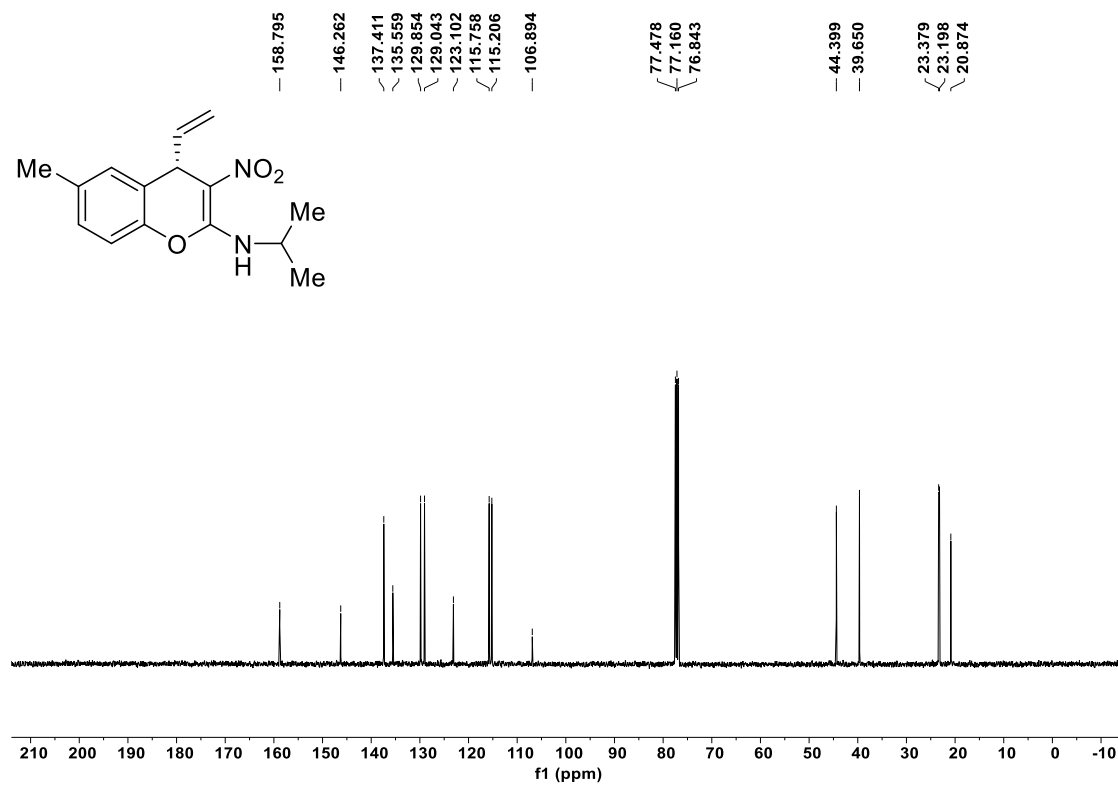

<sup>1</sup>H NMR (400 MHz) of **37** in CDCl<sub>3</sub>

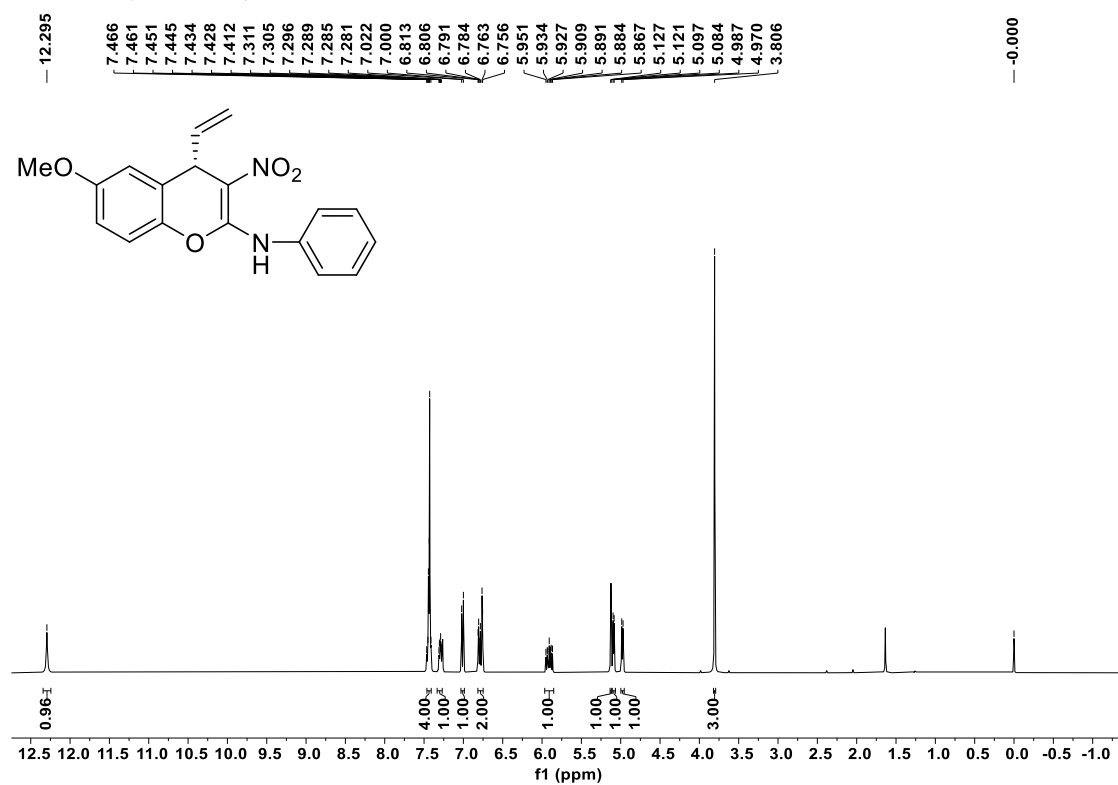

<sup>13</sup>C NMR (100 MHz) of **37** in CDCl<sub>3</sub>

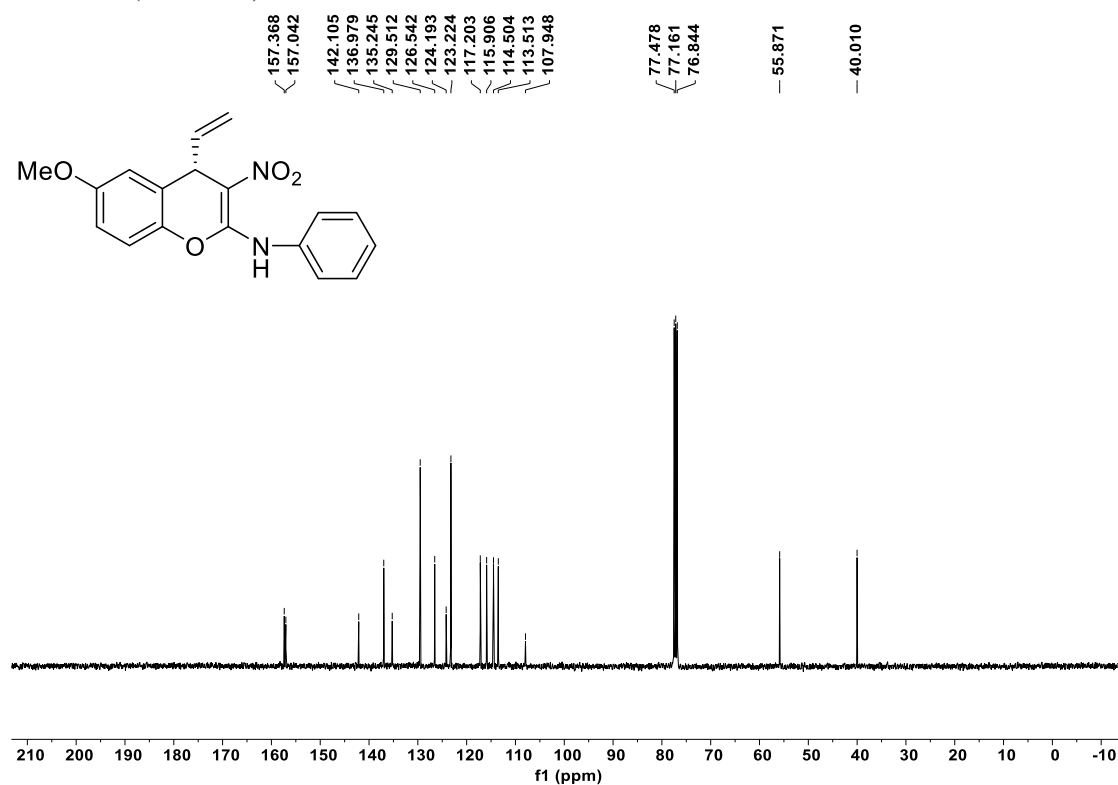

<sup>1</sup>H NMR (400 MHz) of **38** in CDCl<sub>3</sub>

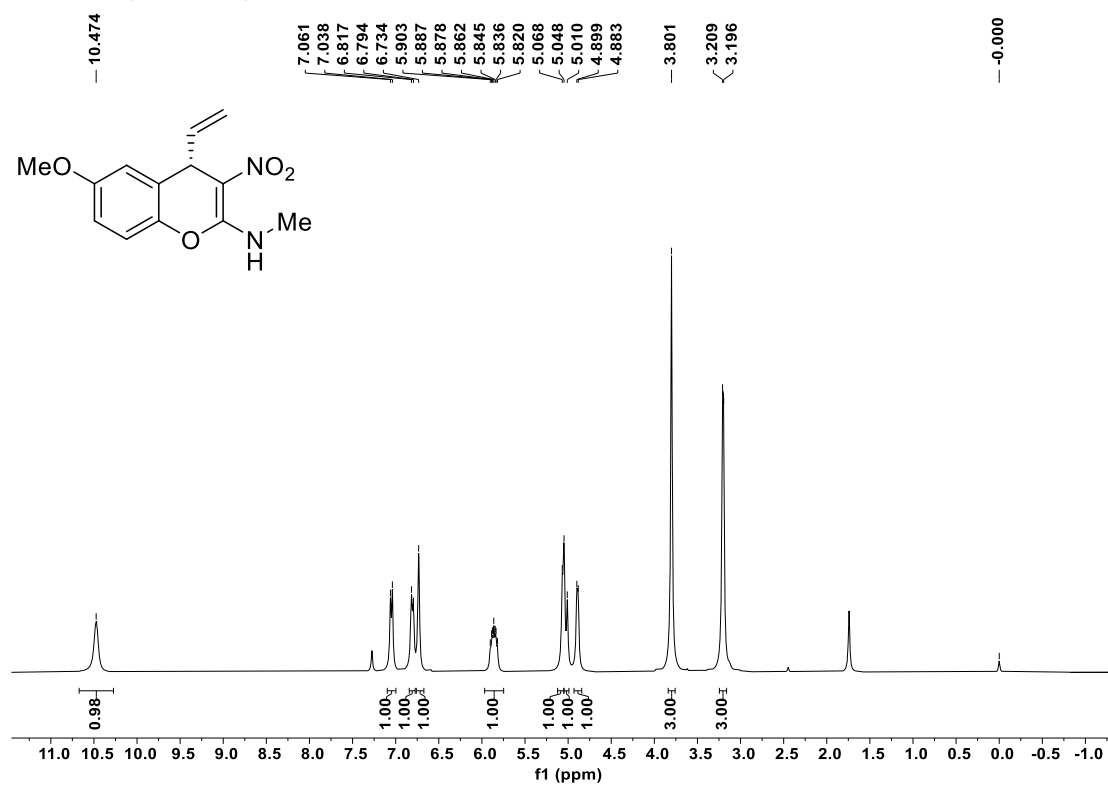

<sup>13</sup>C NMR (100 MHz) of **38** in CDCl<sub>3</sub>

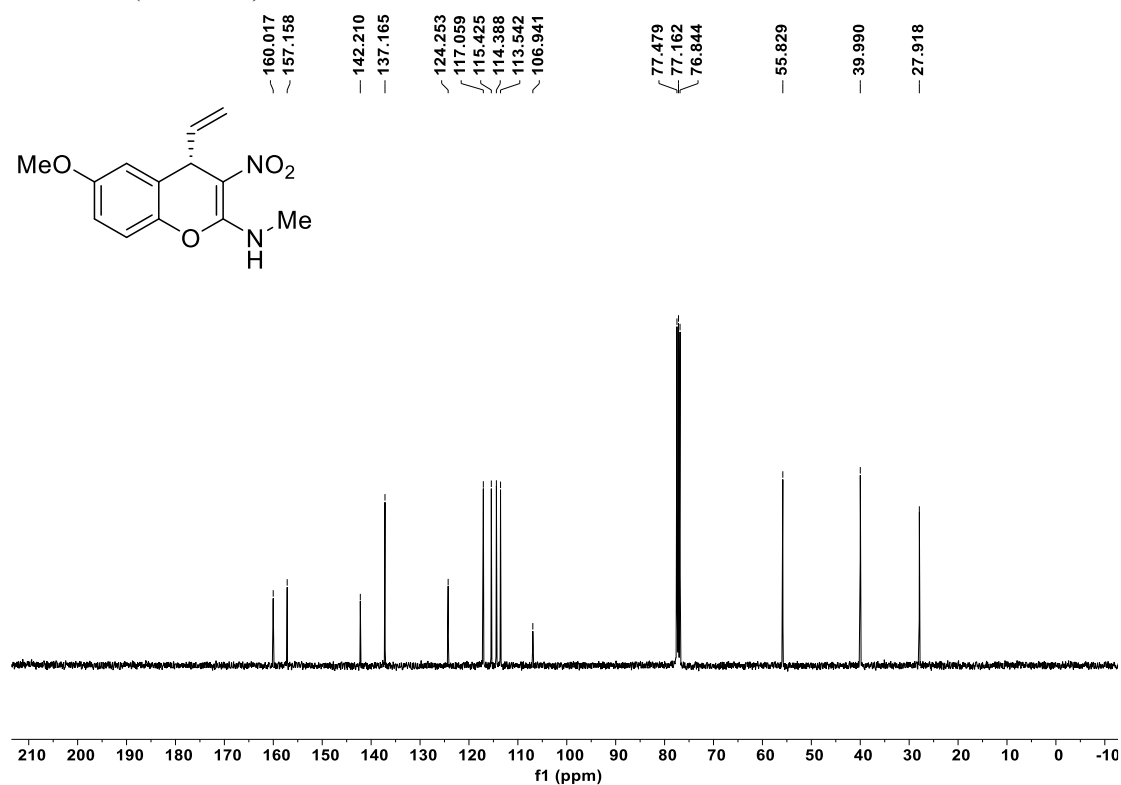

<sup>1</sup>H NMR (400 MHz) of **39** in CDCl<sub>3</sub>

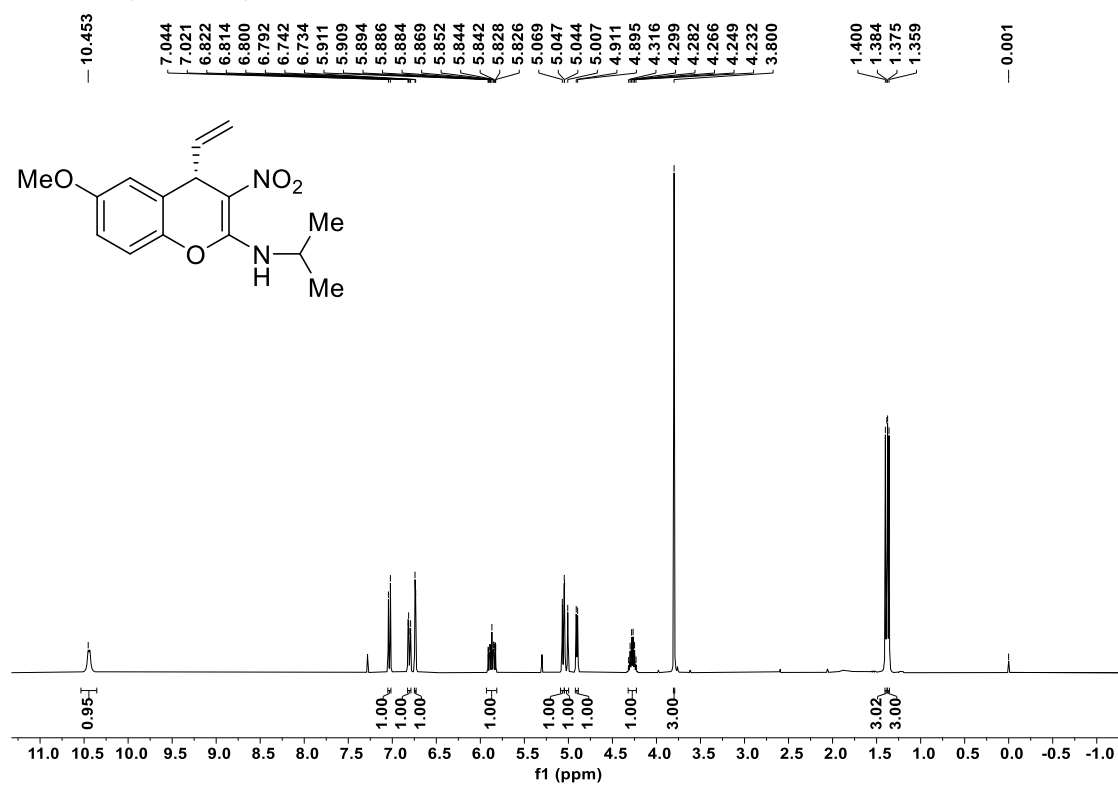

<sup>13</sup>C NMR (100 MHz) of **39** in CDCl<sub>3</sub>

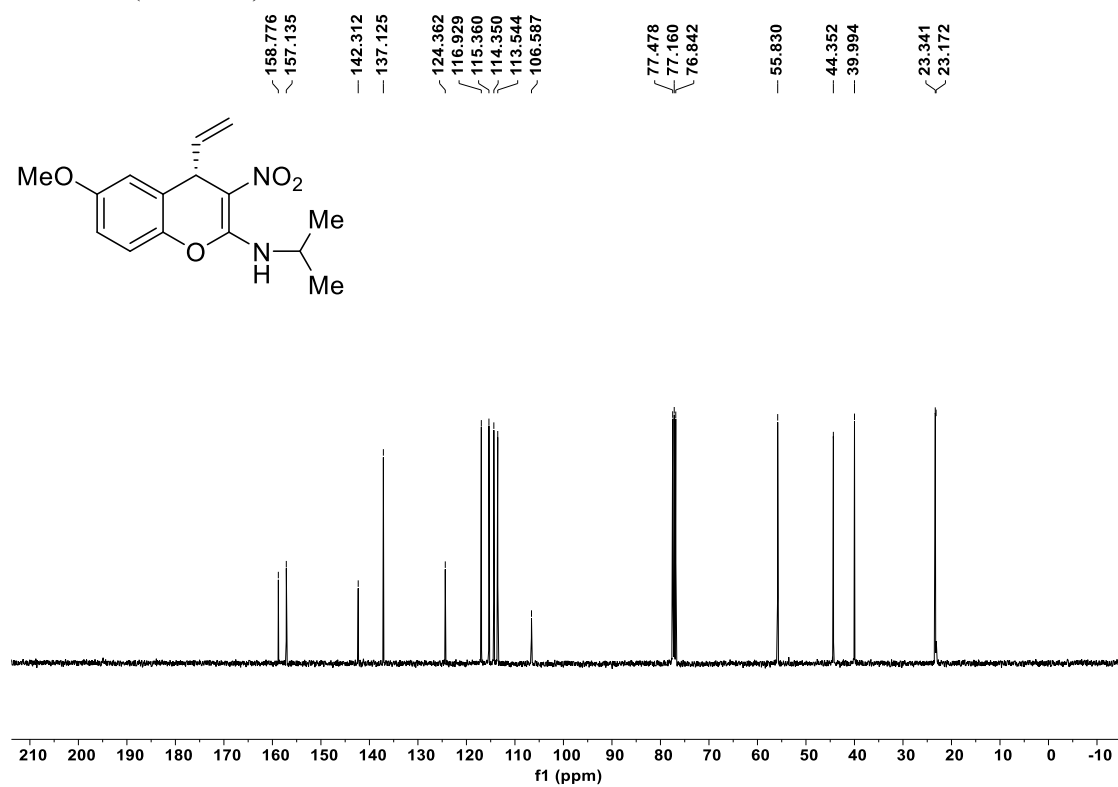



<sup>1</sup>H NMR (400 MHz) of **40** in CDCl<sub>3</sub>

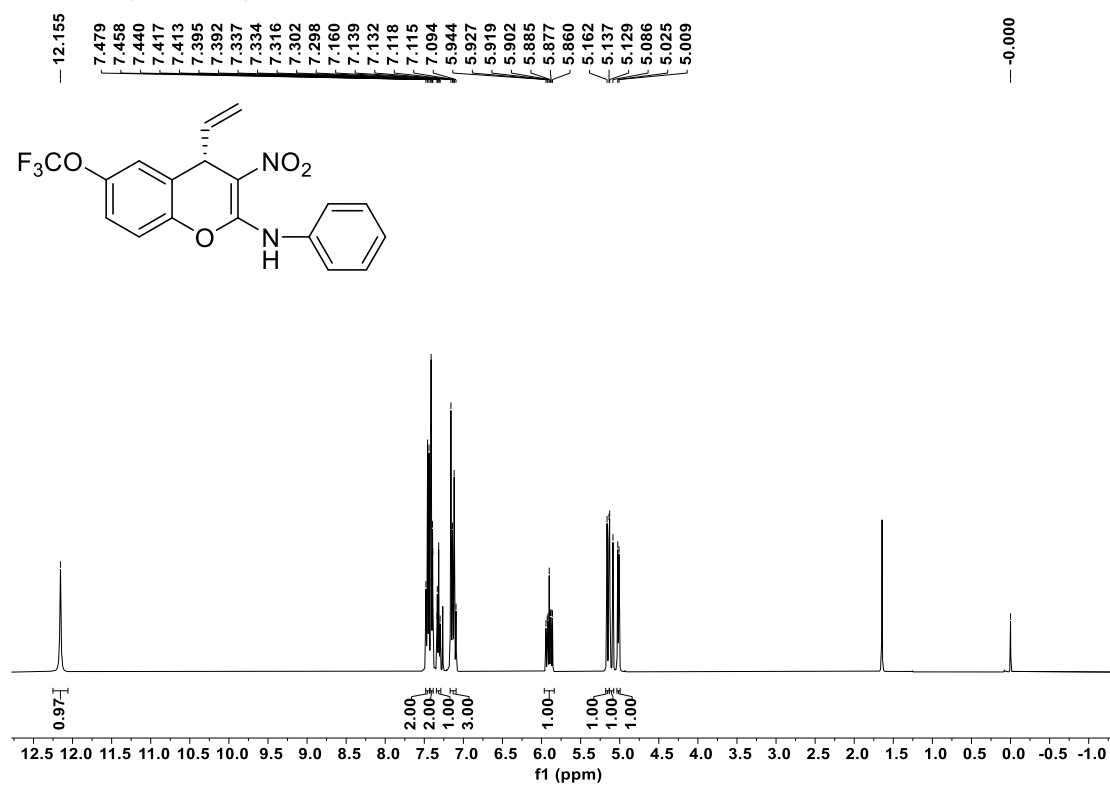

<sup>13</sup>C NMR (100 MHz) of **40** in CDCl<sub>3</sub>

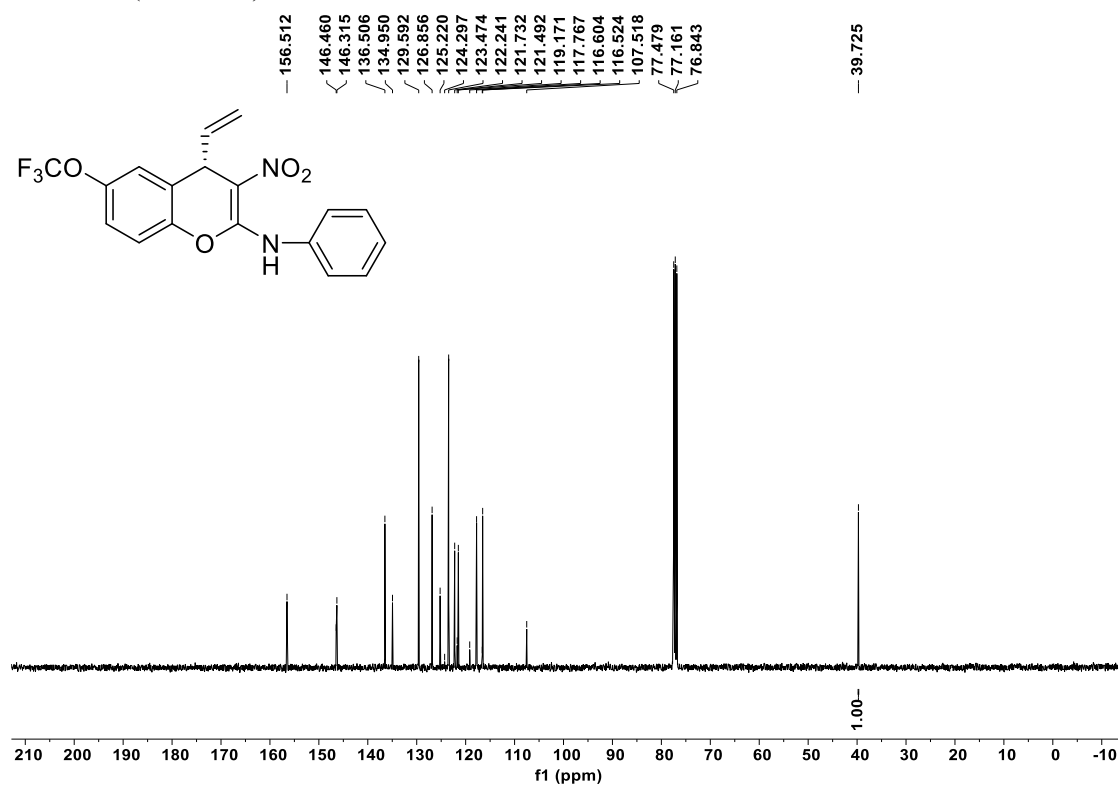

$^{19}\text{F}$  NMR (376 MHz) of **40** in  $\text{CDCl}_3$

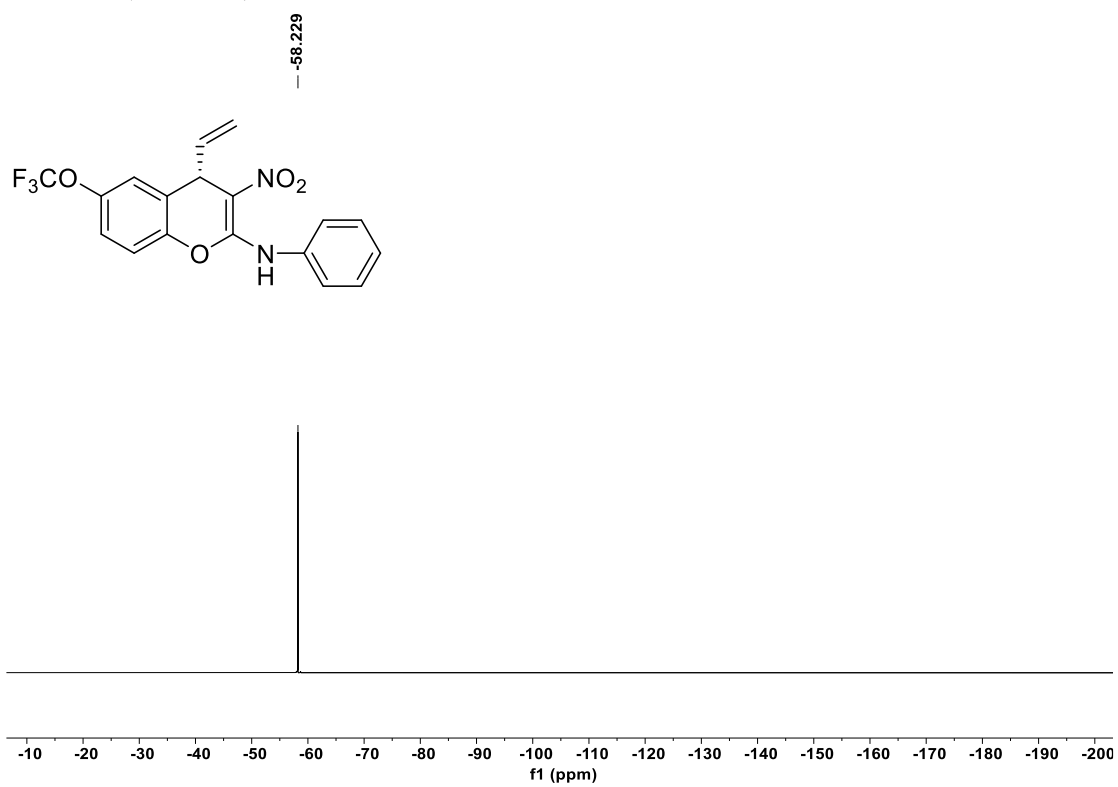

$^1\text{H}$  NMR (400 MHz) of **41** in  $\text{CDCl}_3$

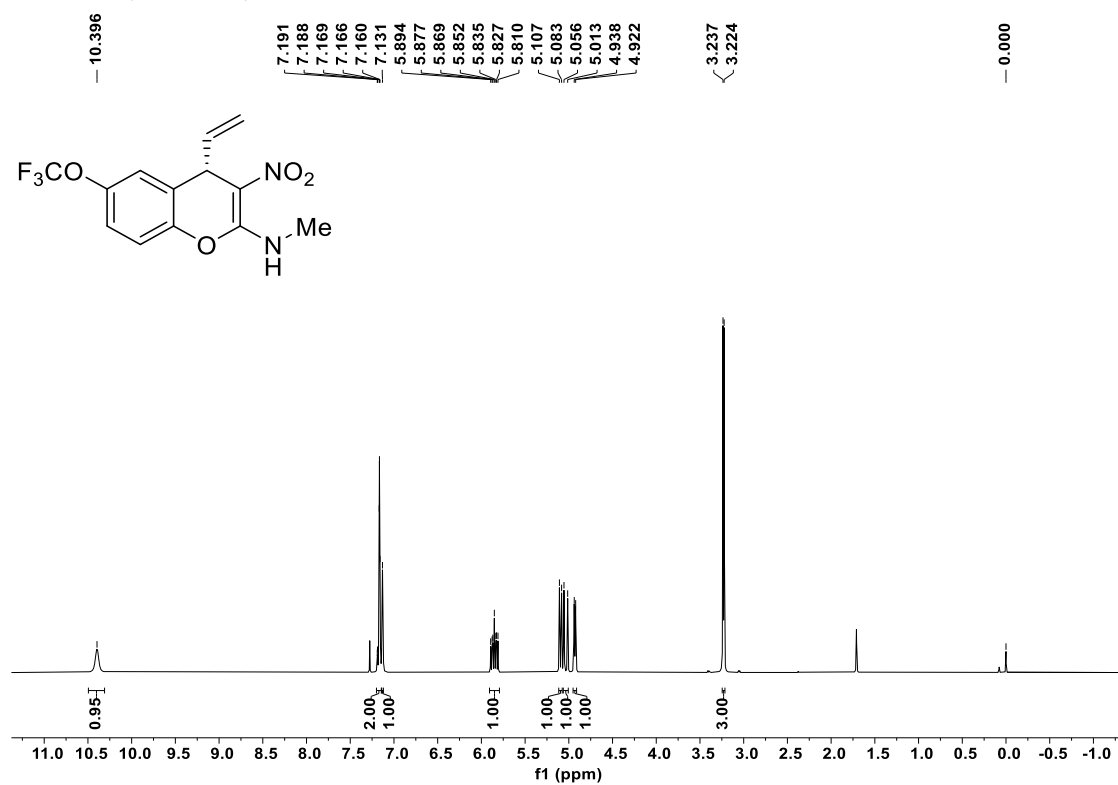

$^{13}\text{C}$  NMR (100 MHz) of **41** in  $\text{CDCl}_3$

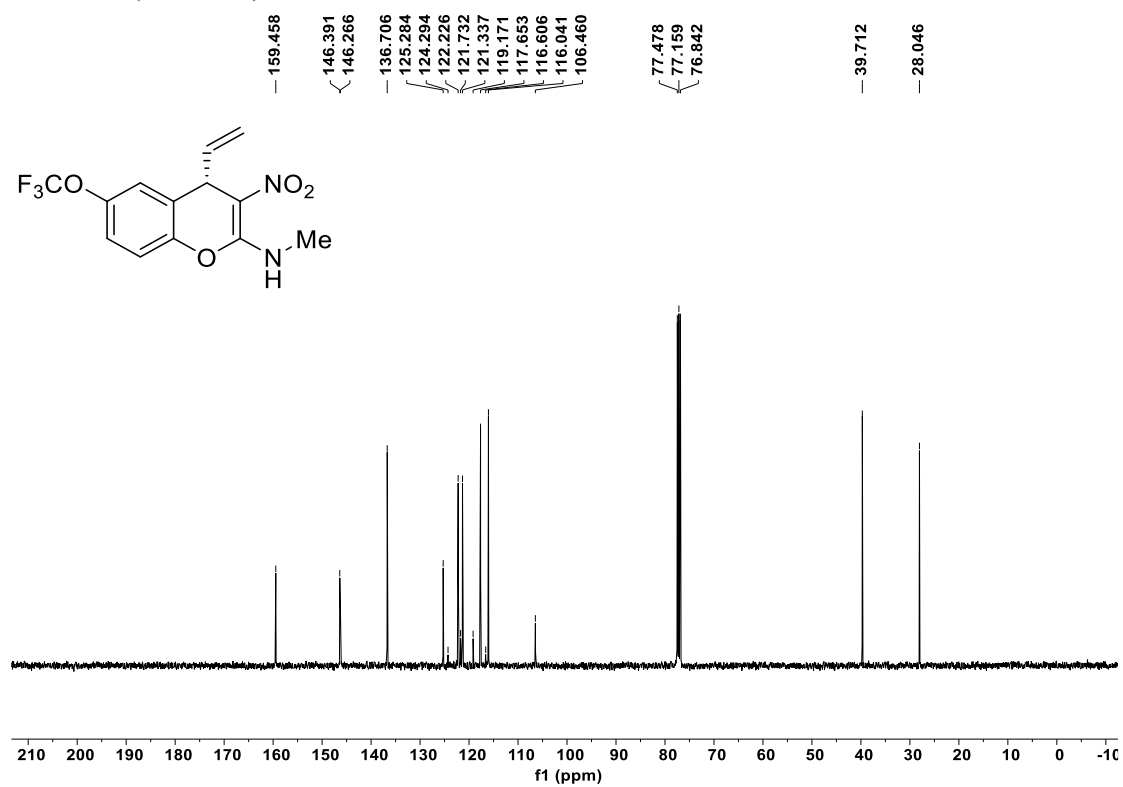

$^{19}\text{F}$  NMR (376 MHz) of **41** in  $\text{CDCl}_3$

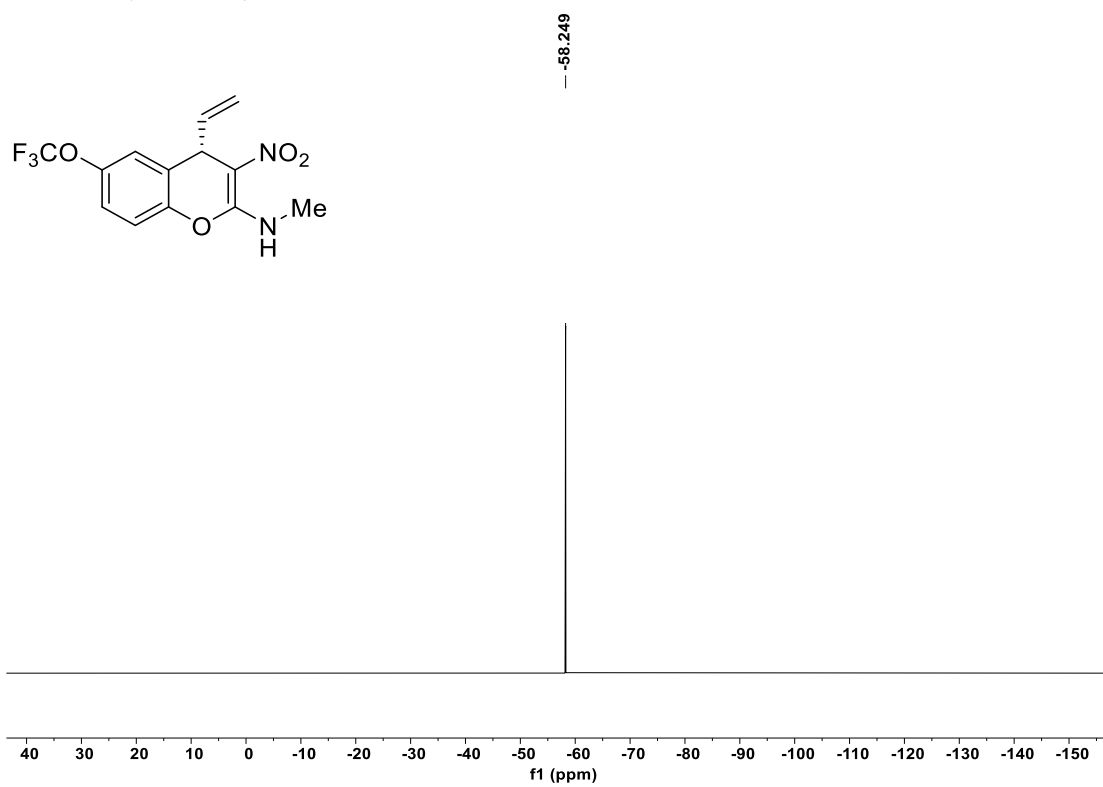

<sup>1</sup>H NMR (400 MHz) of **42** in CDCl<sub>3</sub>

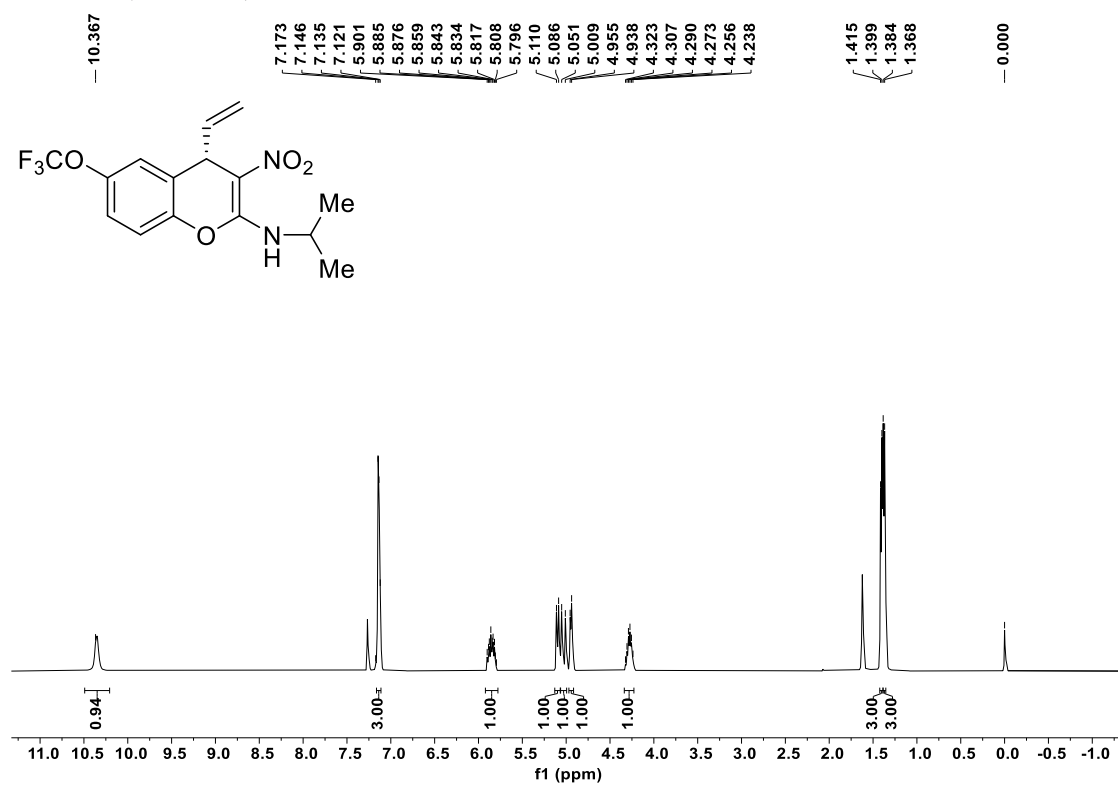

<sup>13</sup>C NMR (100 MHz) of **42** in CDCl<sub>3</sub>

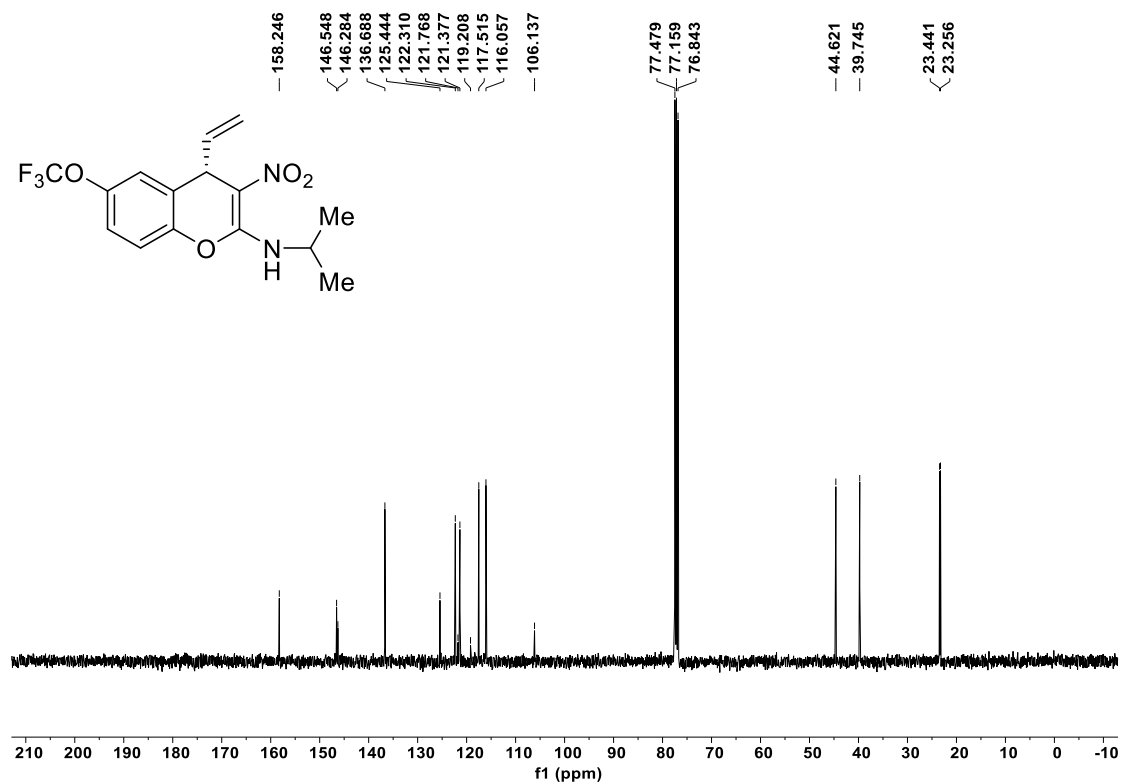

$^{19}\text{F}$  NMR (376 MHz) of **42** in  $\text{CDCl}_3$

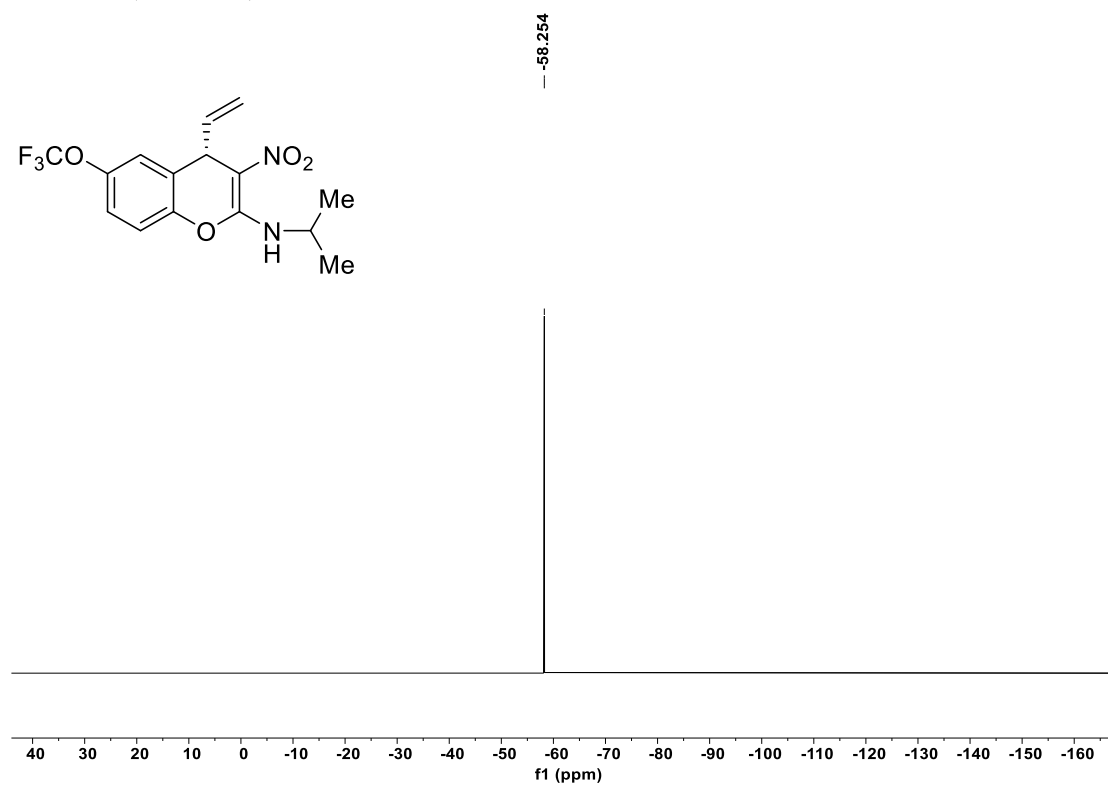

<sup>1</sup>H NMR (400 MHz) of **43** in CDCl<sub>3</sub>

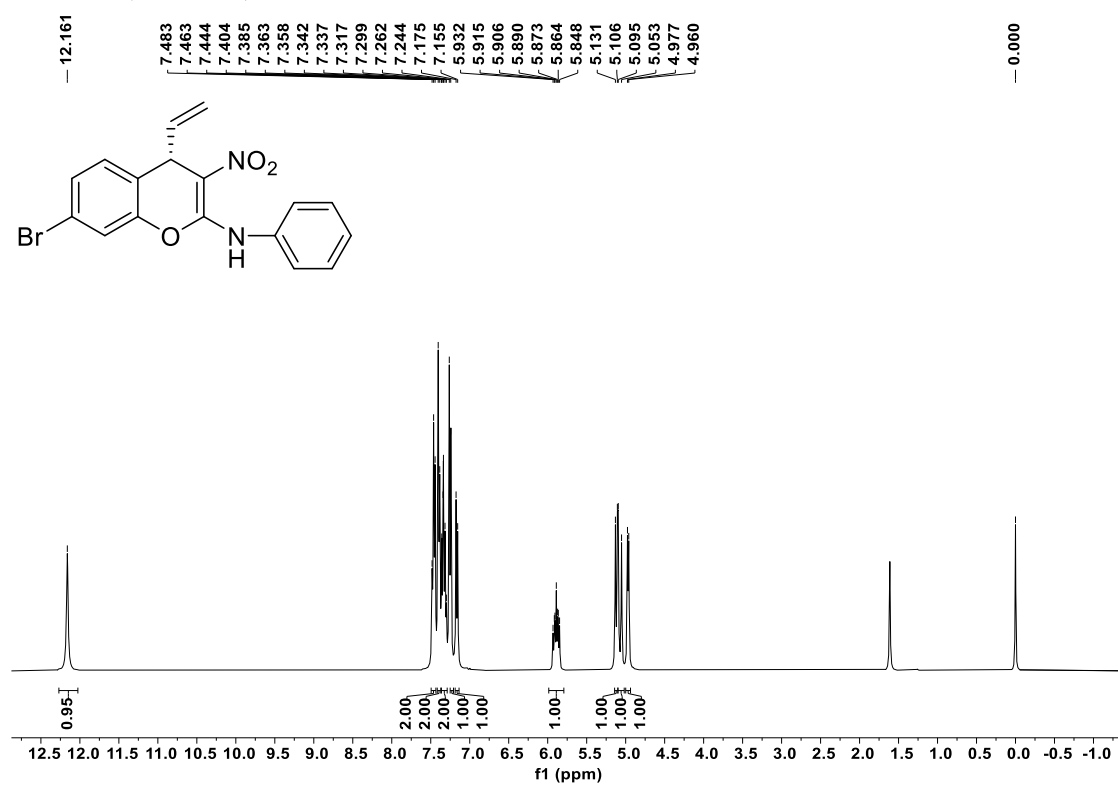

<sup>13</sup>C NMR (100 MHz) of **43** in CDCl<sub>3</sub>

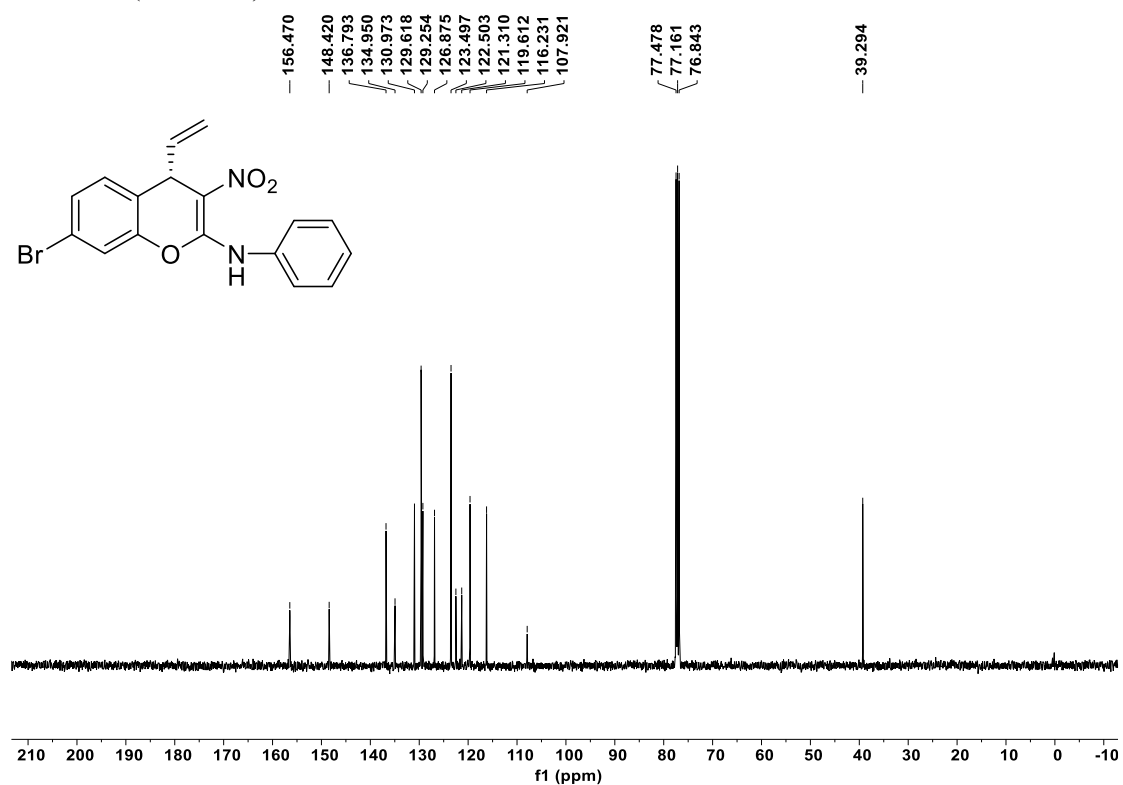

$^1\text{H}$  NMR (400 MHz) of **44** in  $\text{CDCl}_3$

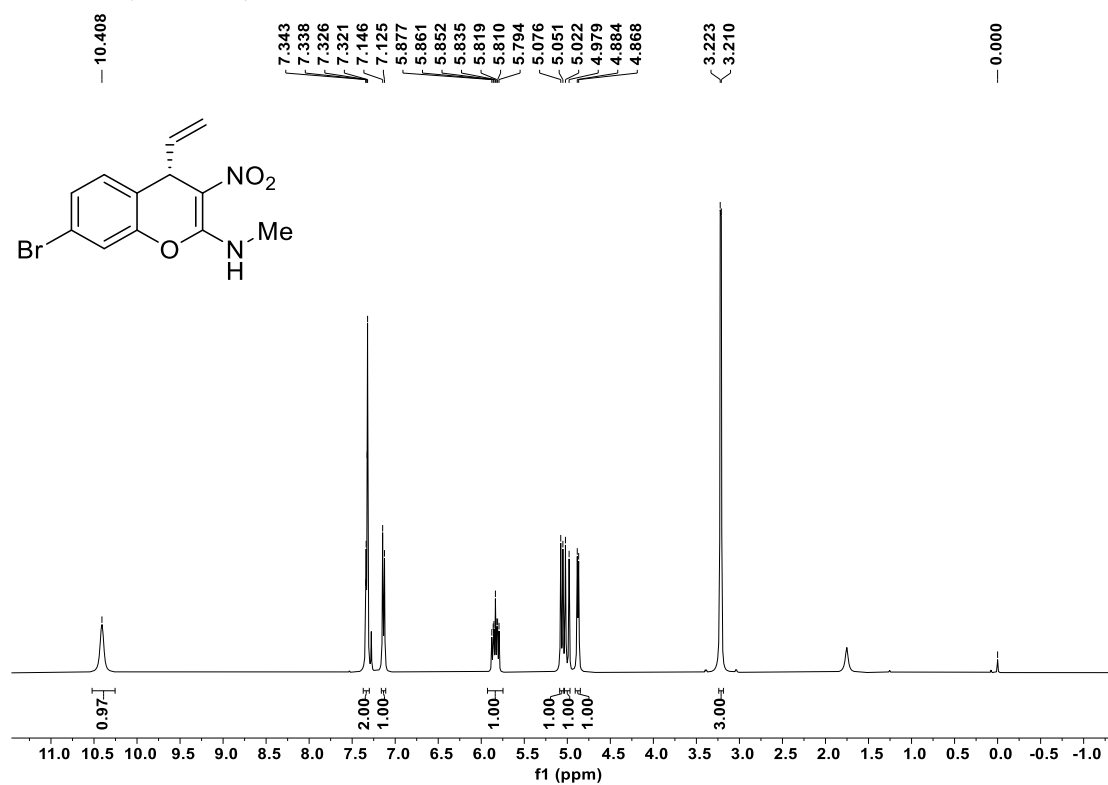

$^{13}\text{C}$  NMR (100 MHz) of **44** in  $\text{CDCl}_3$

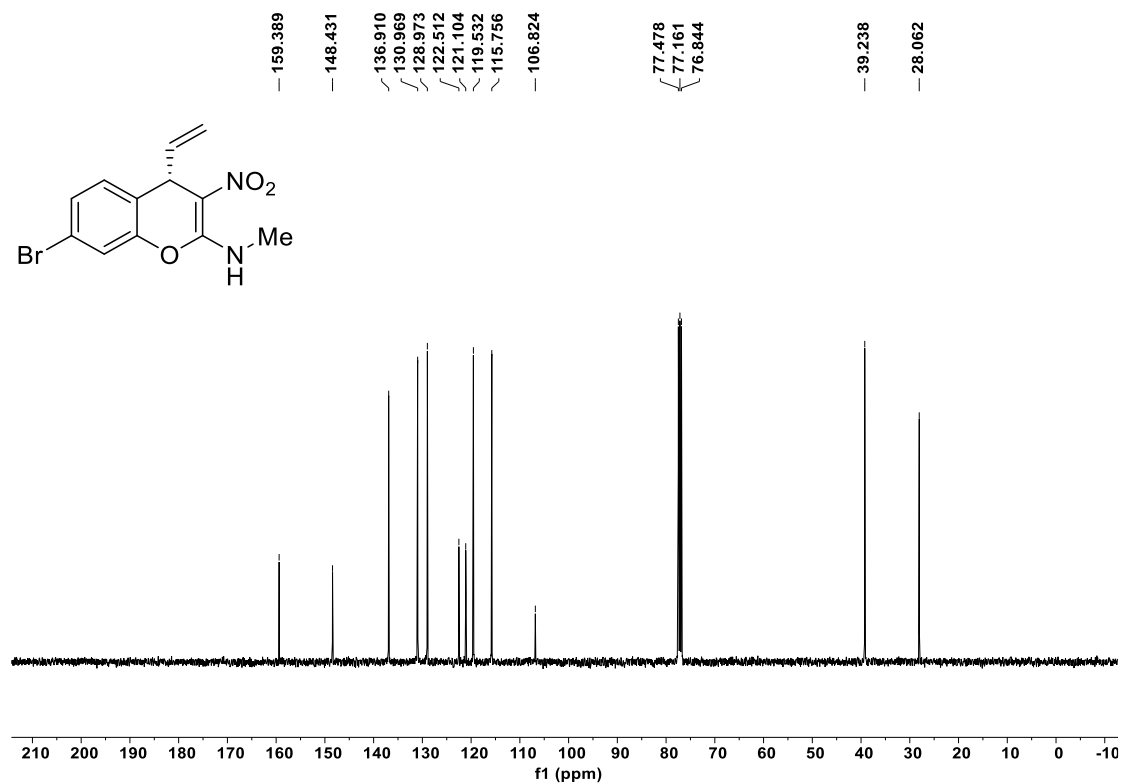



<sup>1</sup>H NMR (400 MHz) of **45** in CDCl<sub>3</sub>

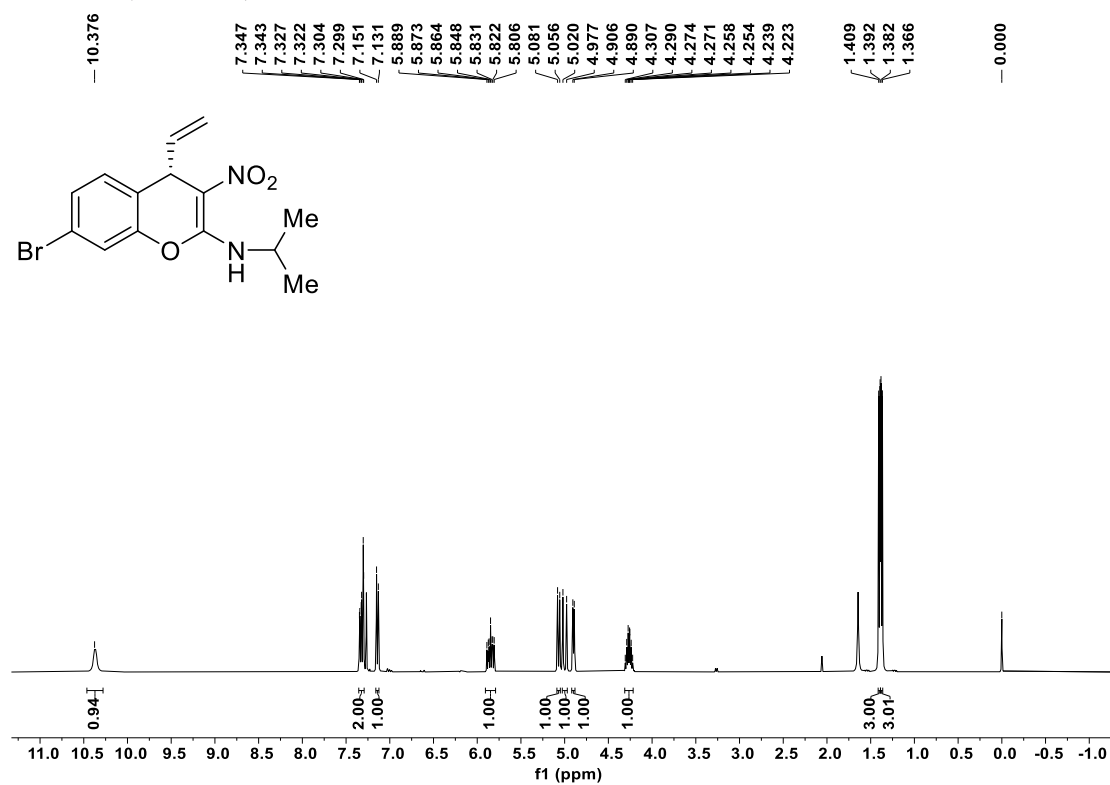

<sup>13</sup>C NMR (100 MHz) of **45** in CDCl<sub>3</sub>

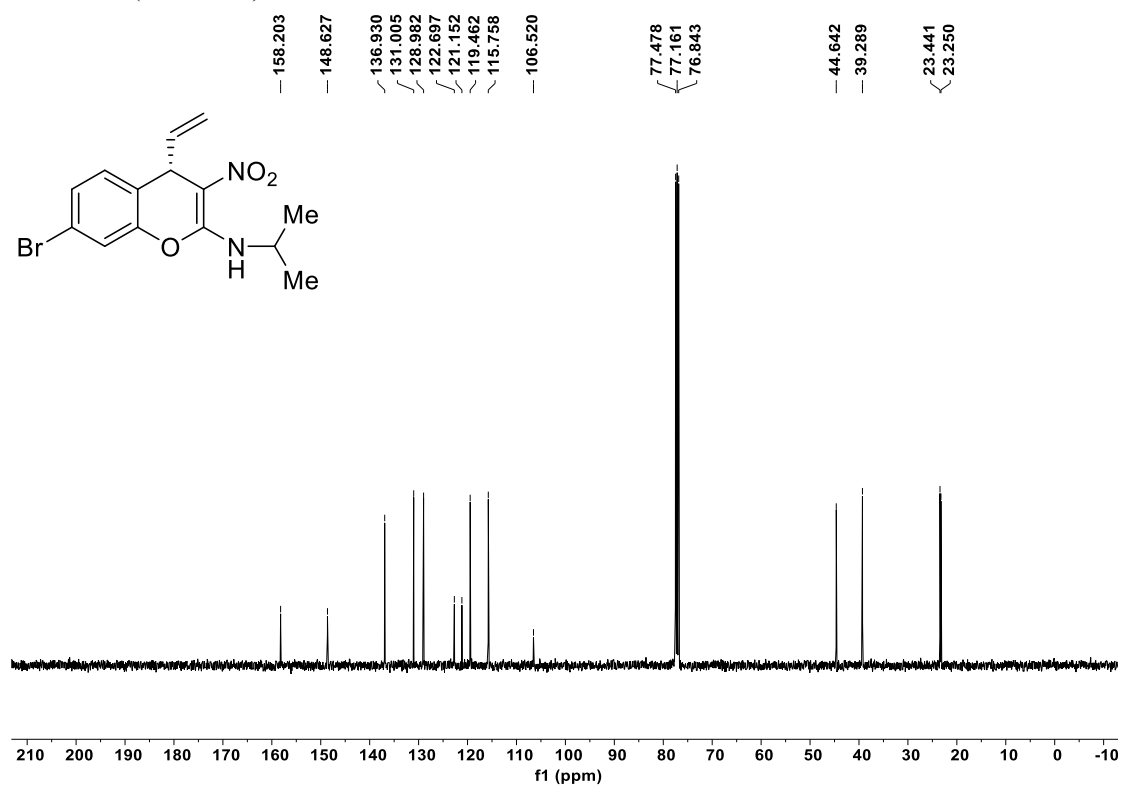

$^1\text{H}$  NMR (400 MHz) of **46** in  $\text{CDCl}_3$

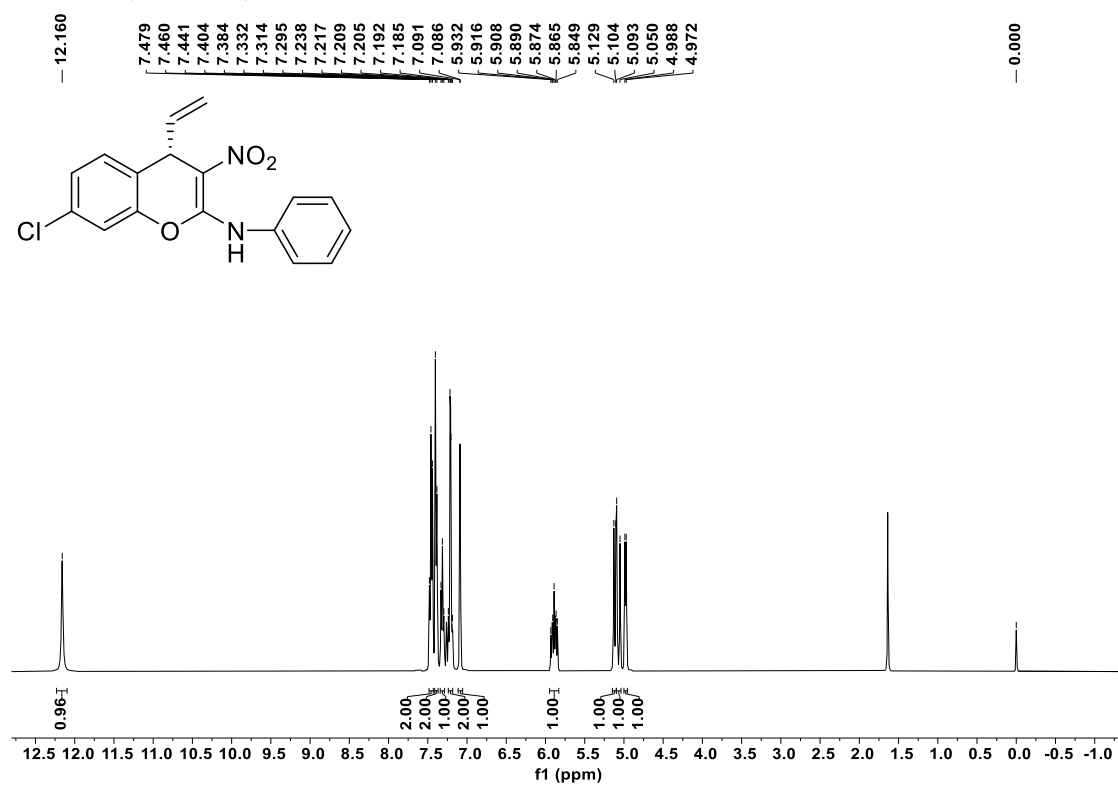

$^{13}\text{C}$  NMR (100 MHz) of **46** in  $\text{CDCl}_3$

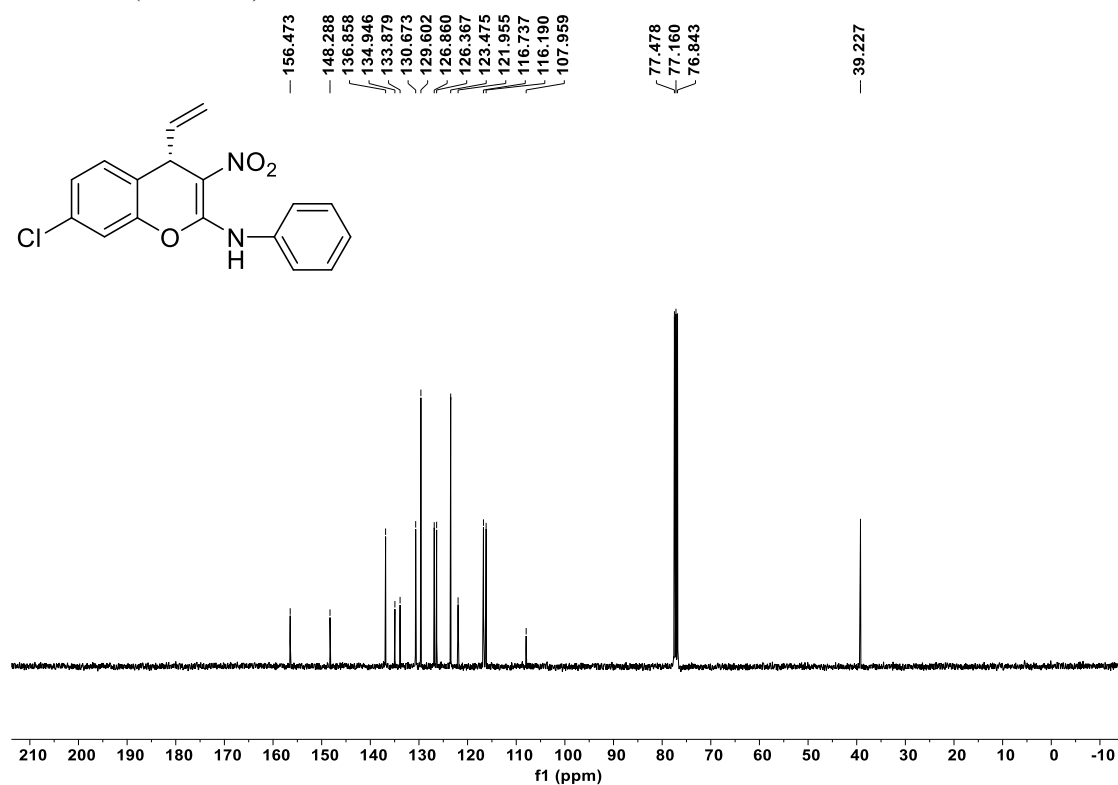

<sup>1</sup>H NMR (400 MHz) of **47** in CDCl<sub>3</sub>

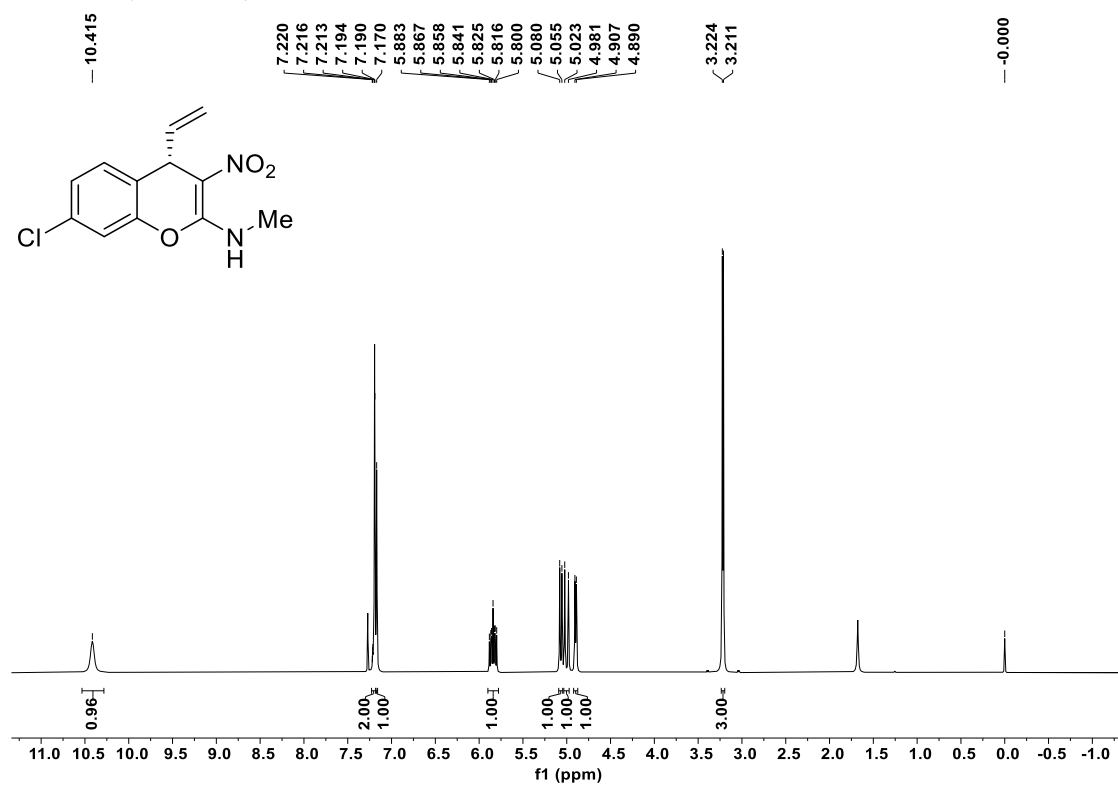

<sup>13</sup>C NMR (100 MHz) of **47** in CDCl<sub>3</sub>

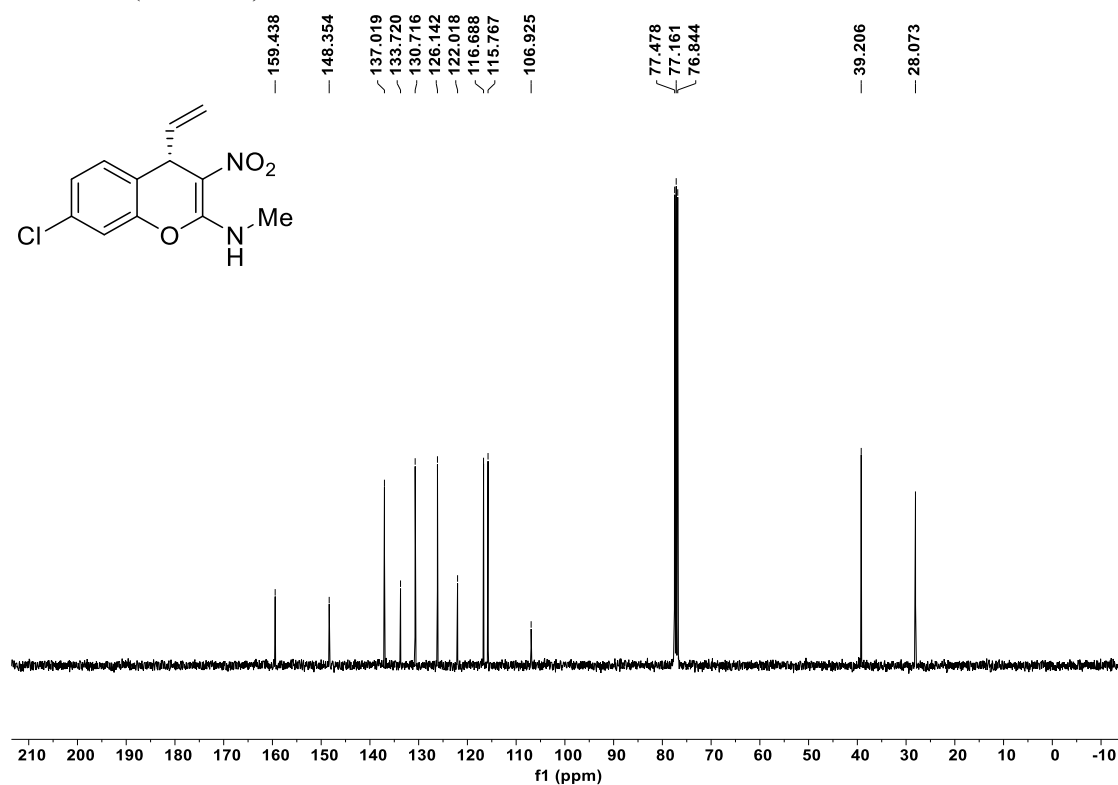

$^1\text{H}$  NMR (400 MHz) of **48** in  $\text{CDCl}_3$

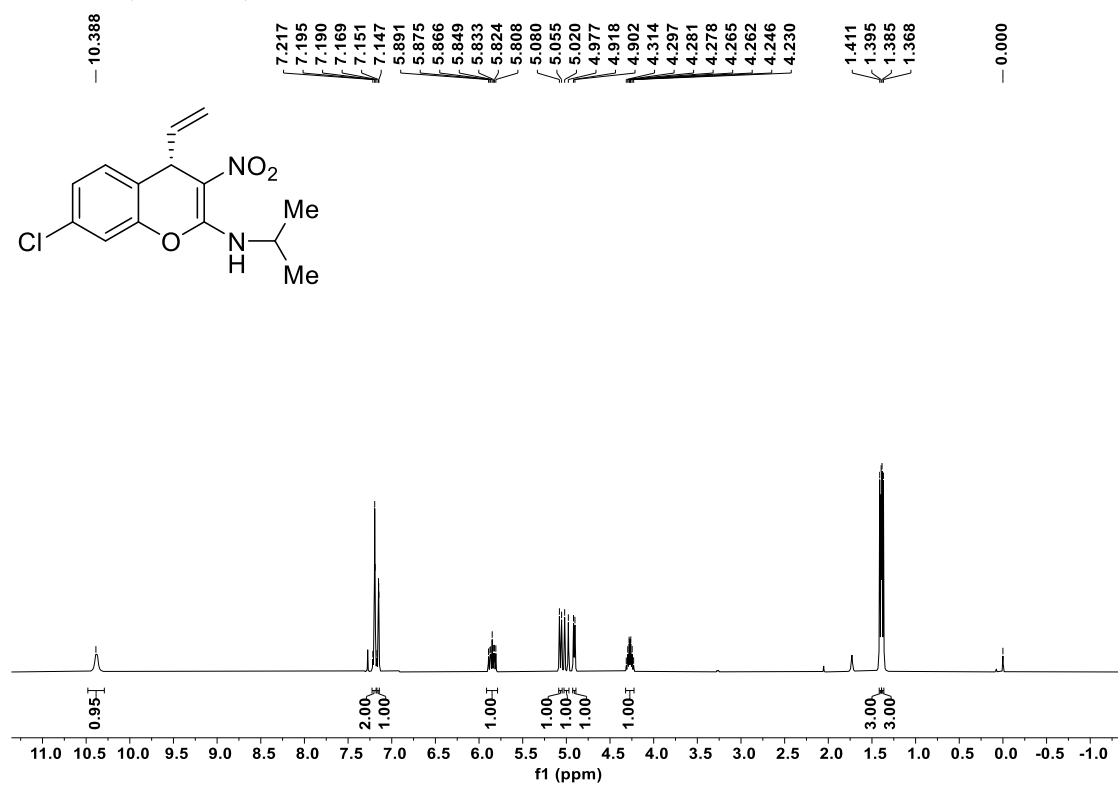

$^{13}\text{C}$  NMR (100 MHz) of **48** in  $\text{CDCl}_3$

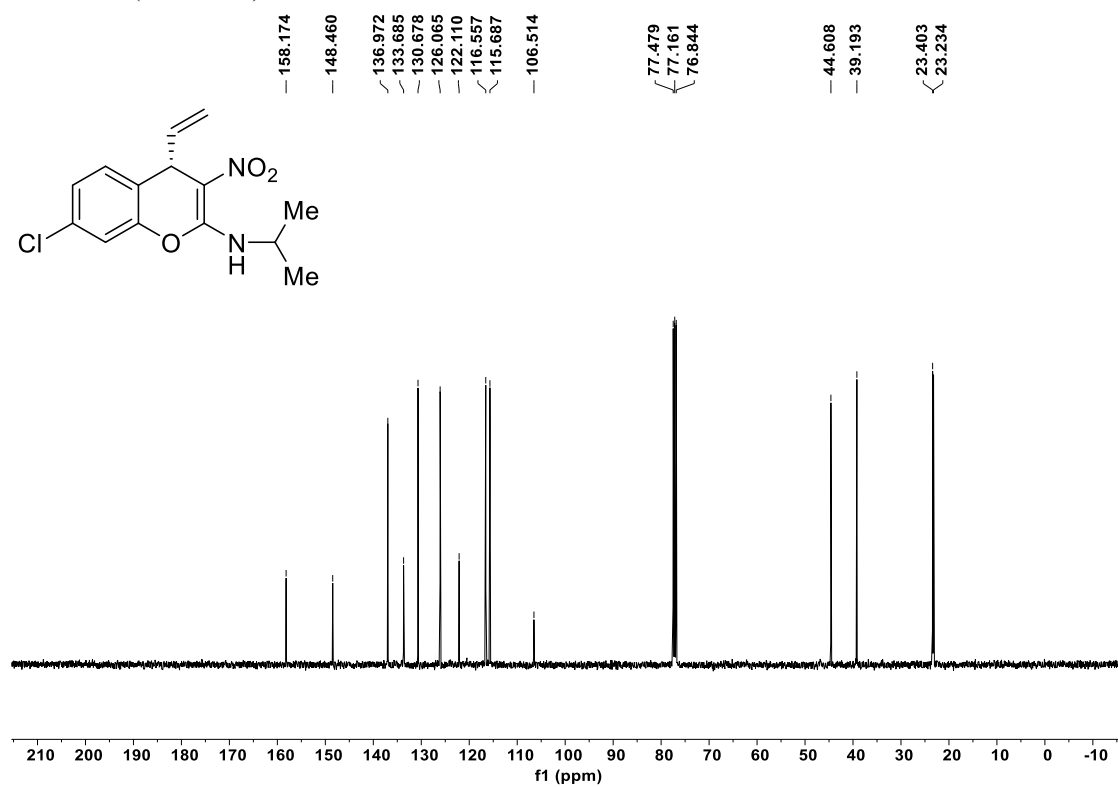

<sup>1</sup>H NMR (400 MHz) of **49** in CDCl<sub>3</sub>

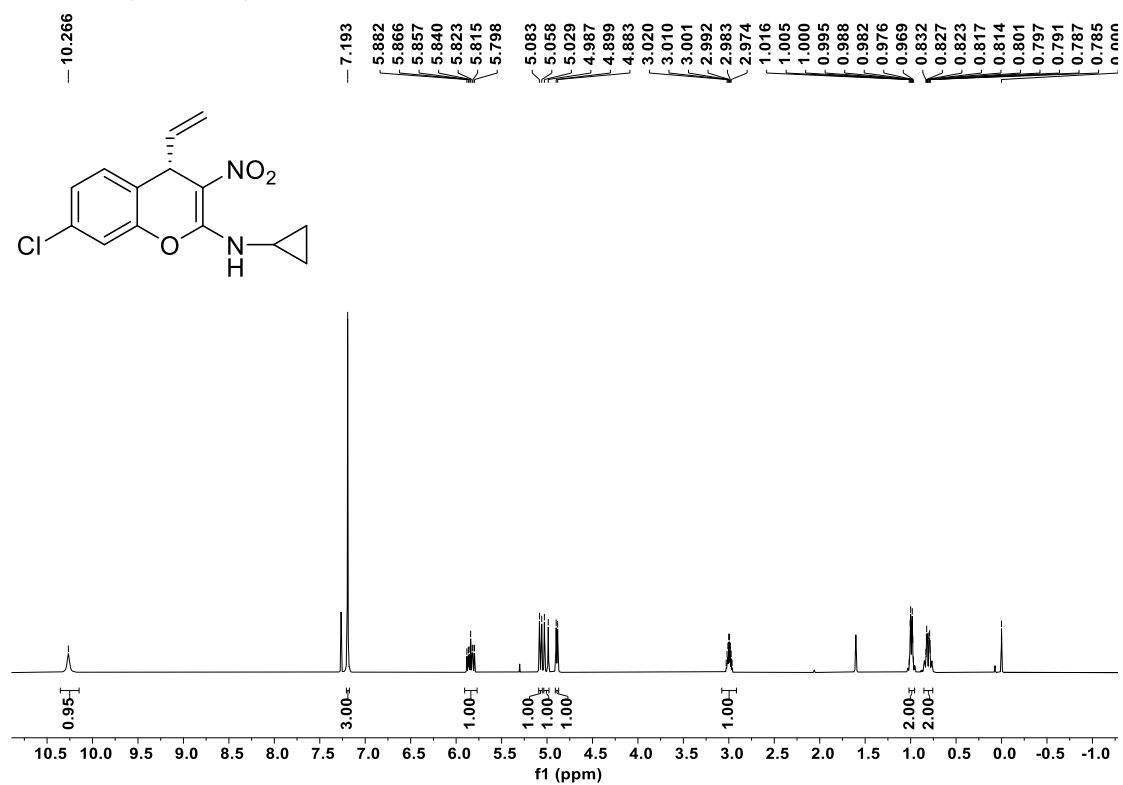

<sup>13</sup>C NMR (100 MHz) of **49** in CDCl<sub>3</sub>

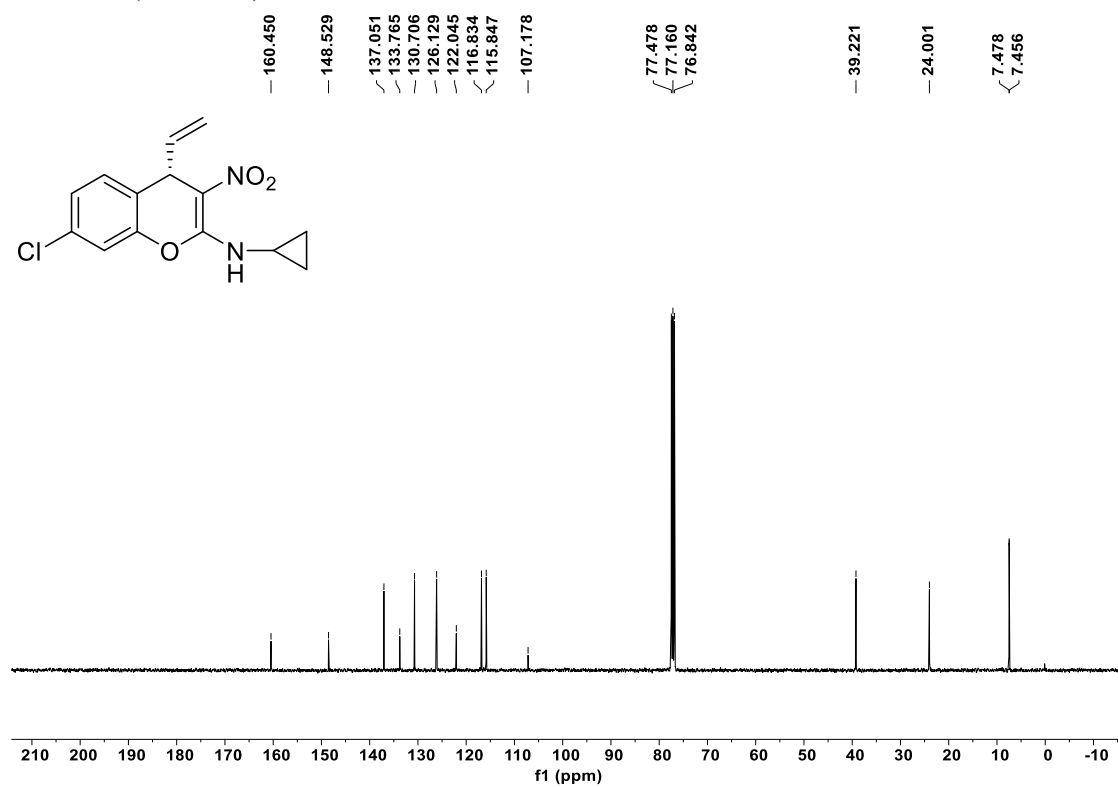

$^1\text{H}$  NMR (400 MHz) of **50** in  $\text{CDCl}_3$

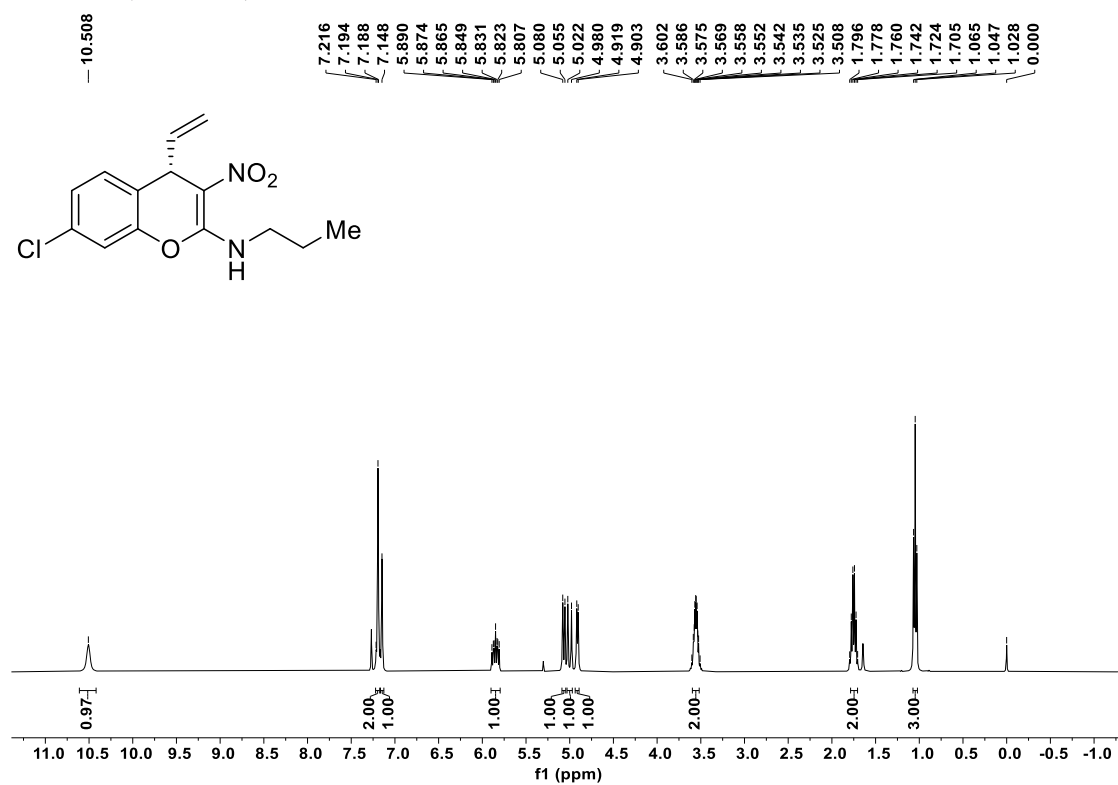

$^{13}\text{C}$  NMR (100 MHz) of **50** in  $\text{CDCl}_3$

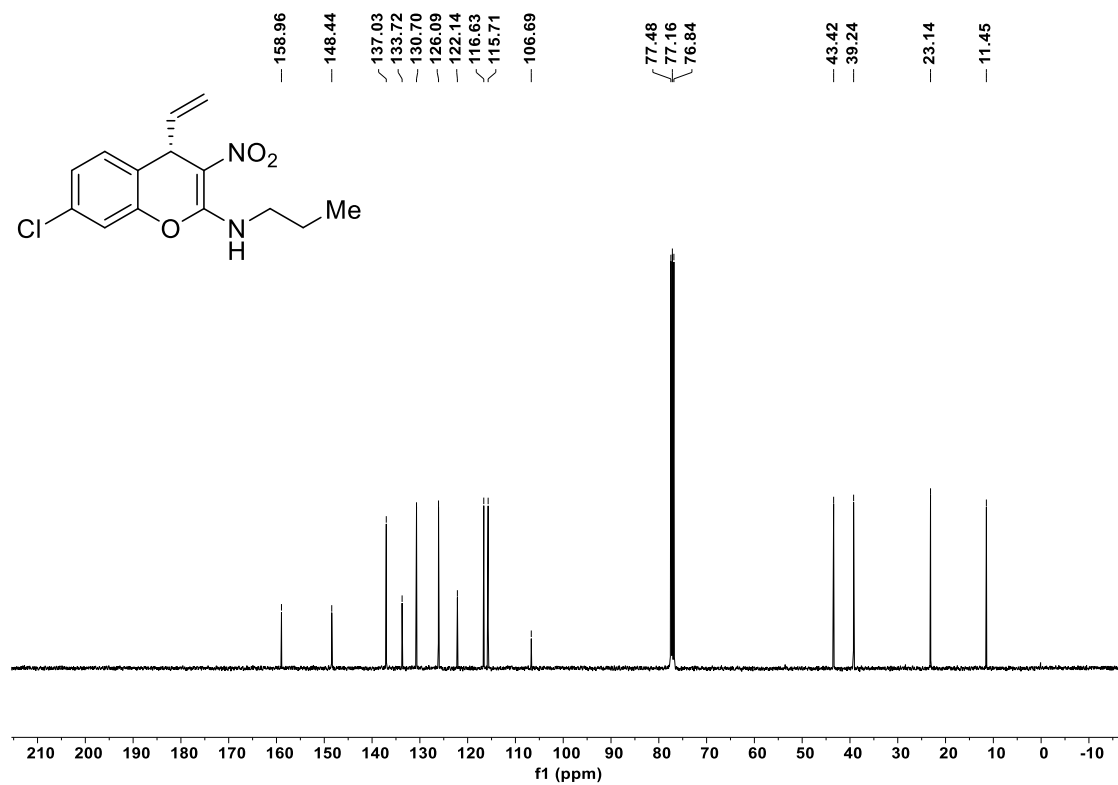

$^1\text{H}$  NMR (400 MHz) of **51** in  $\text{CDCl}_3$

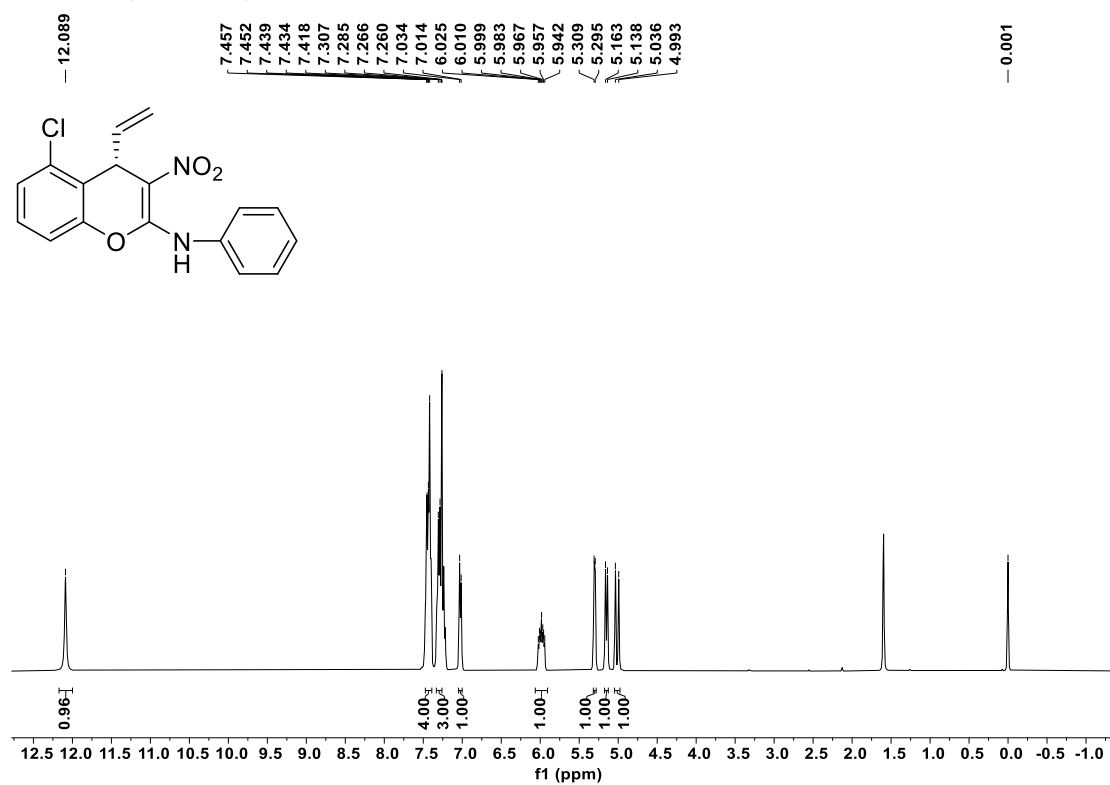

$^{13}\text{C}$  NMR (100 MHz) of **51** in  $\text{CDCl}_3$

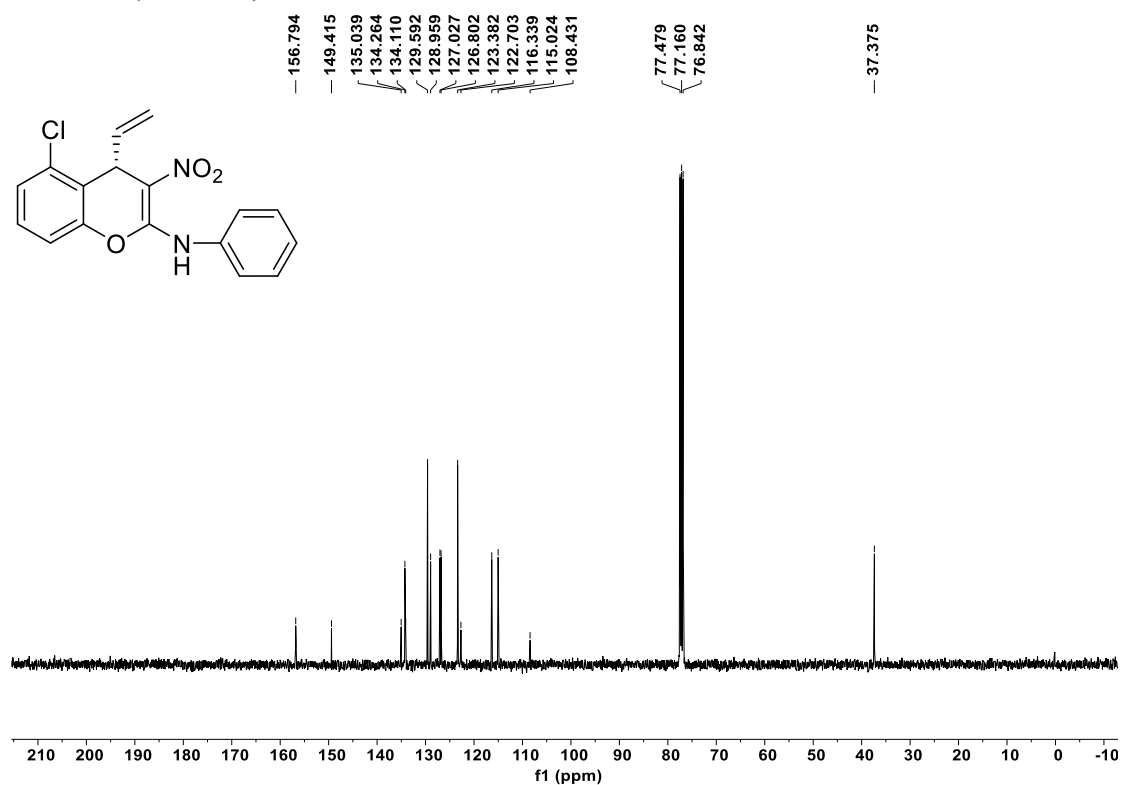

<sup>1</sup>H NMR (400 MHz) of **52** in CDCl<sub>3</sub>

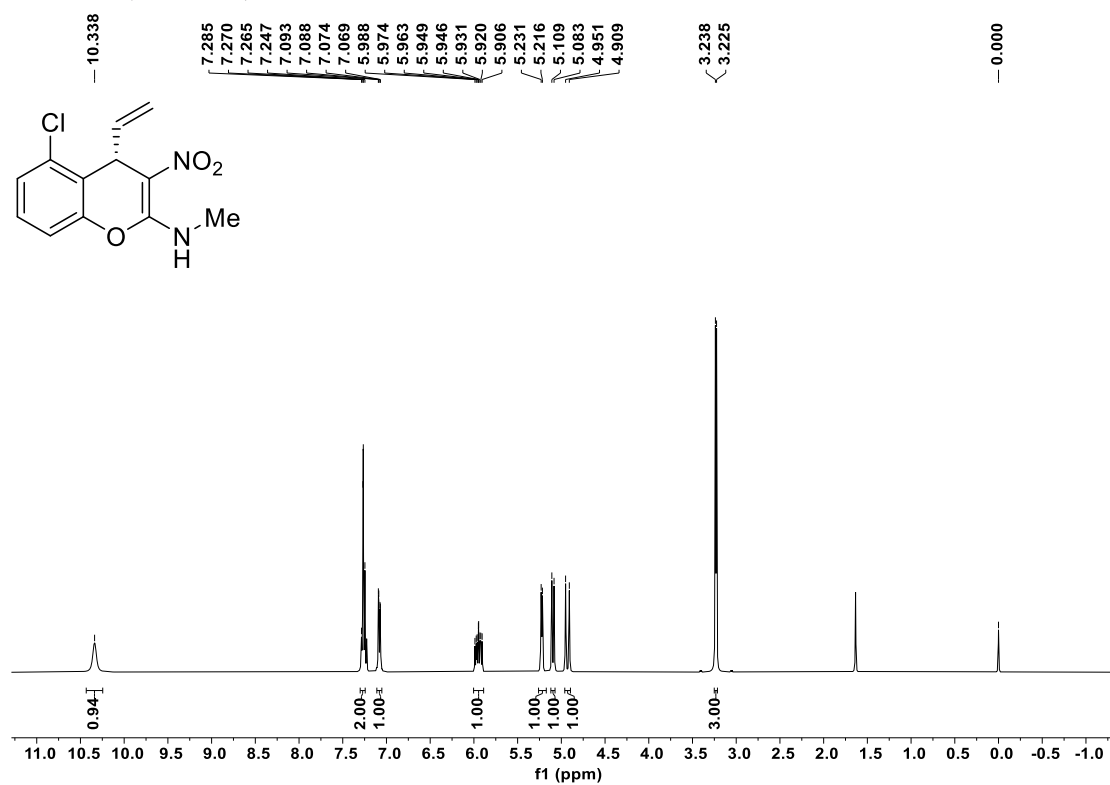

<sup>13</sup>C NMR (100 MHz) of **52** in CDCl<sub>3</sub>

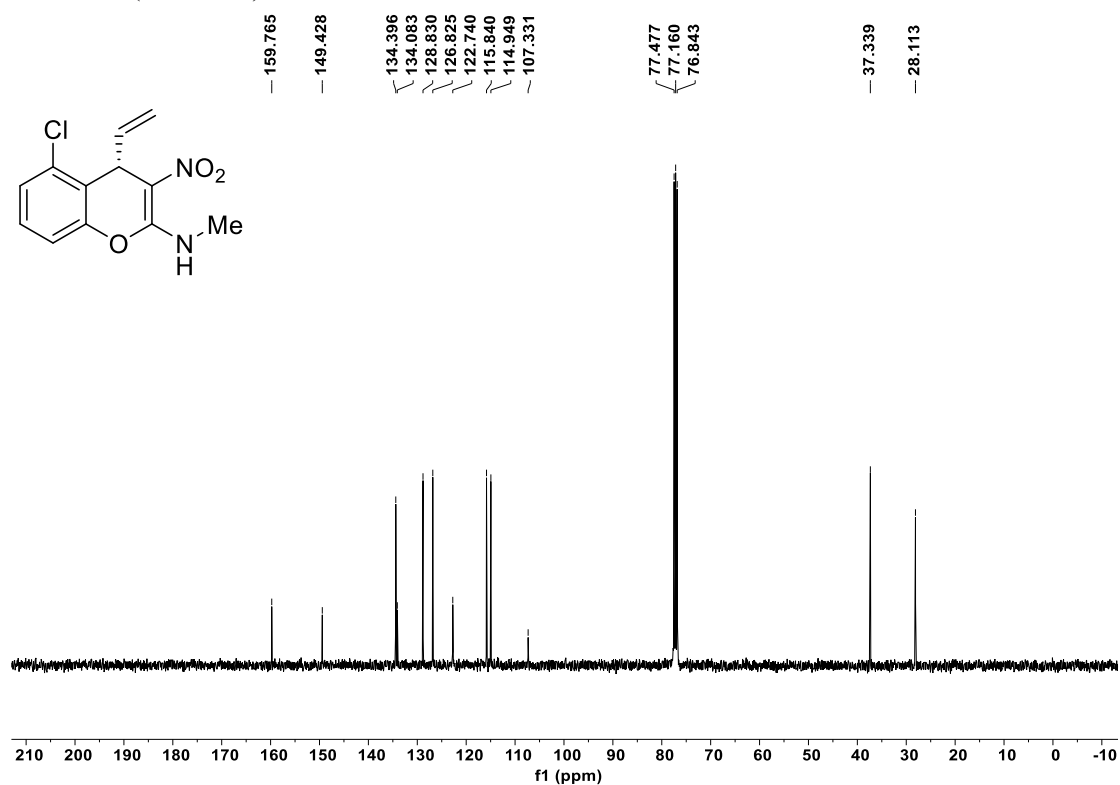



<sup>1</sup>H NMR (400 MHz) of **53** in CDCl<sub>3</sub>

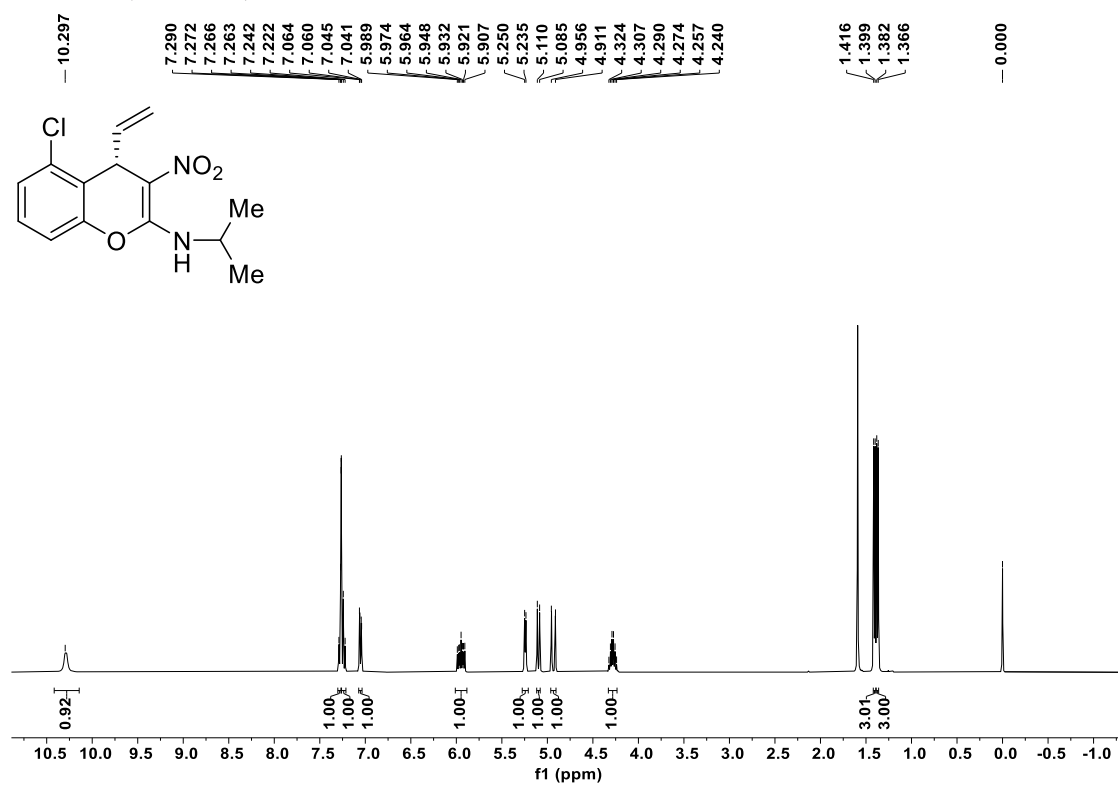

<sup>13</sup>C NMR (100 MHz) of **53** in CDCl<sub>3</sub>

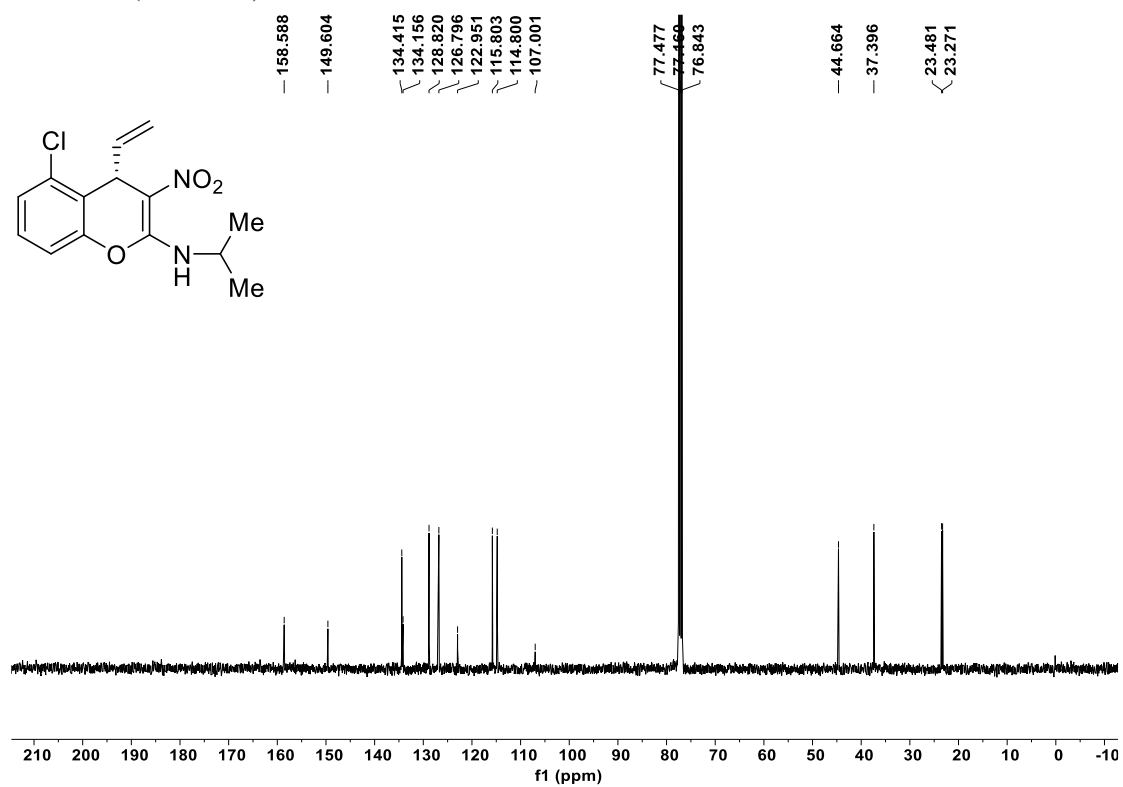

<sup>1</sup>H NMR (400 MHz) of **54** in CDCl<sub>3</sub>

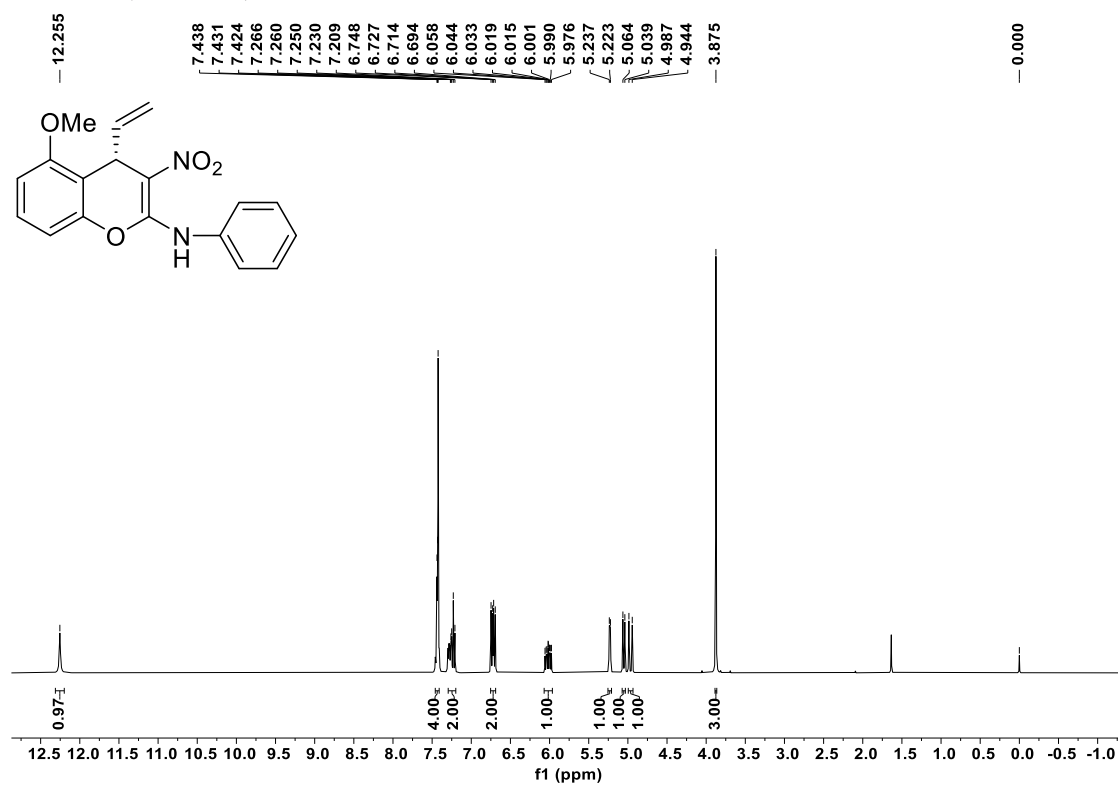

<sup>13</sup>C NMR (100 MHz) of **54** in CDCl<sub>3</sub>

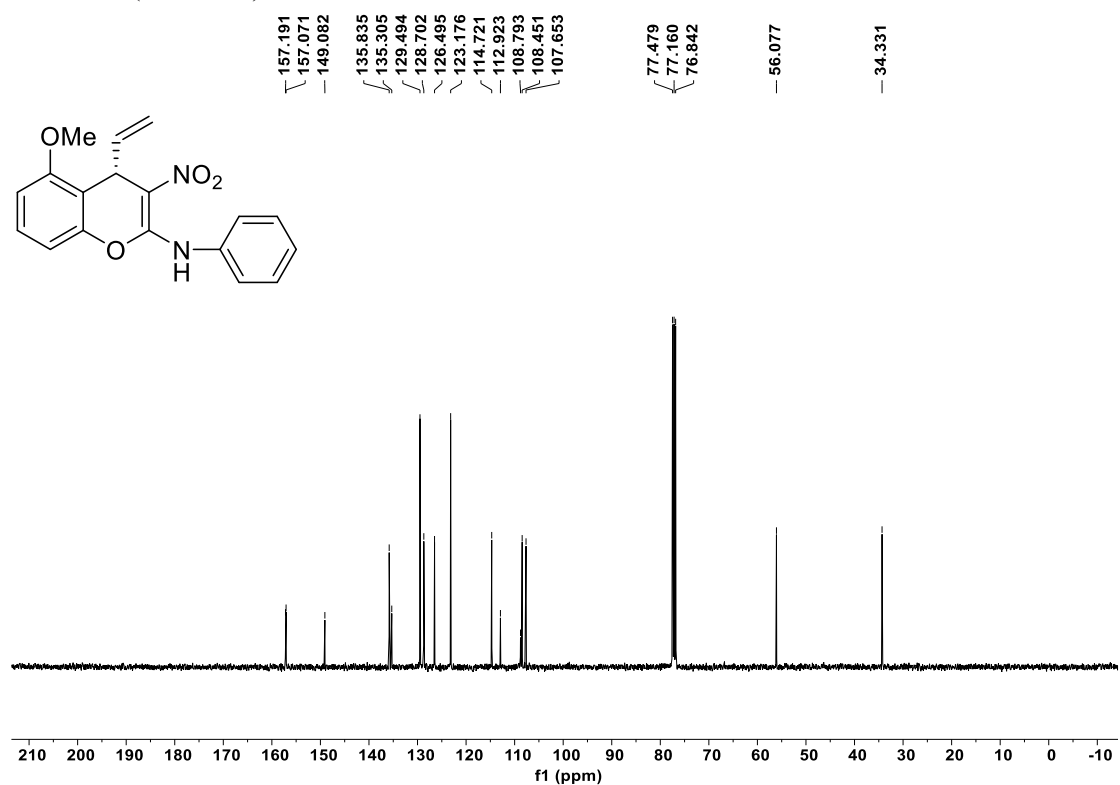

<sup>1</sup>H NMR (400 MHz) of **55** in CDCl<sub>3</sub>

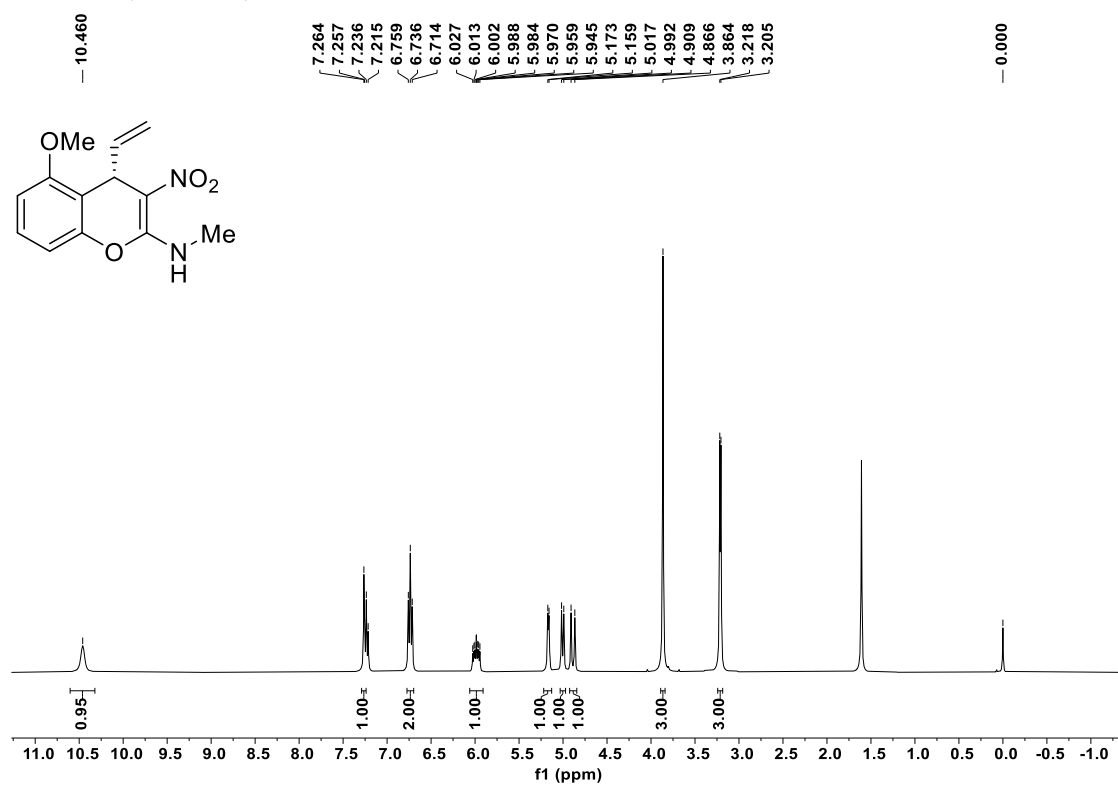

<sup>13</sup>C NMR (100 MHz) of **55** in CDCl<sub>3</sub>

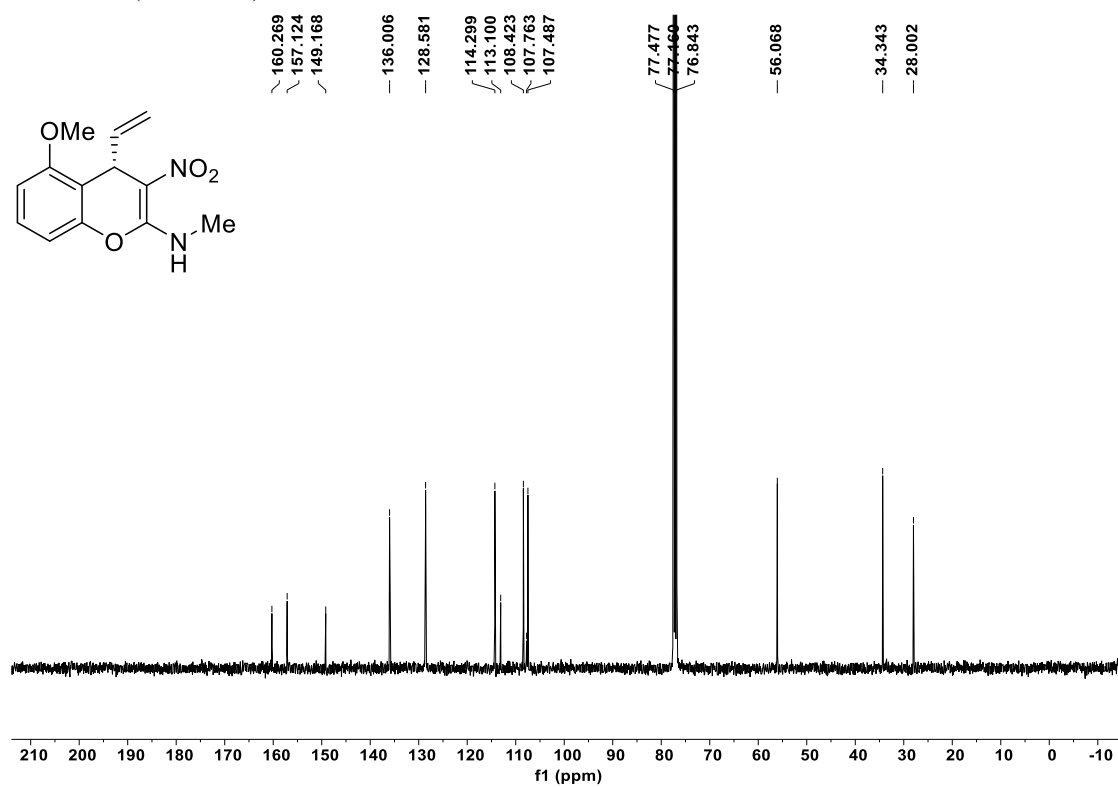

<sup>1</sup>H NMR (400 MHz) of **56** in CDCl<sub>3</sub>

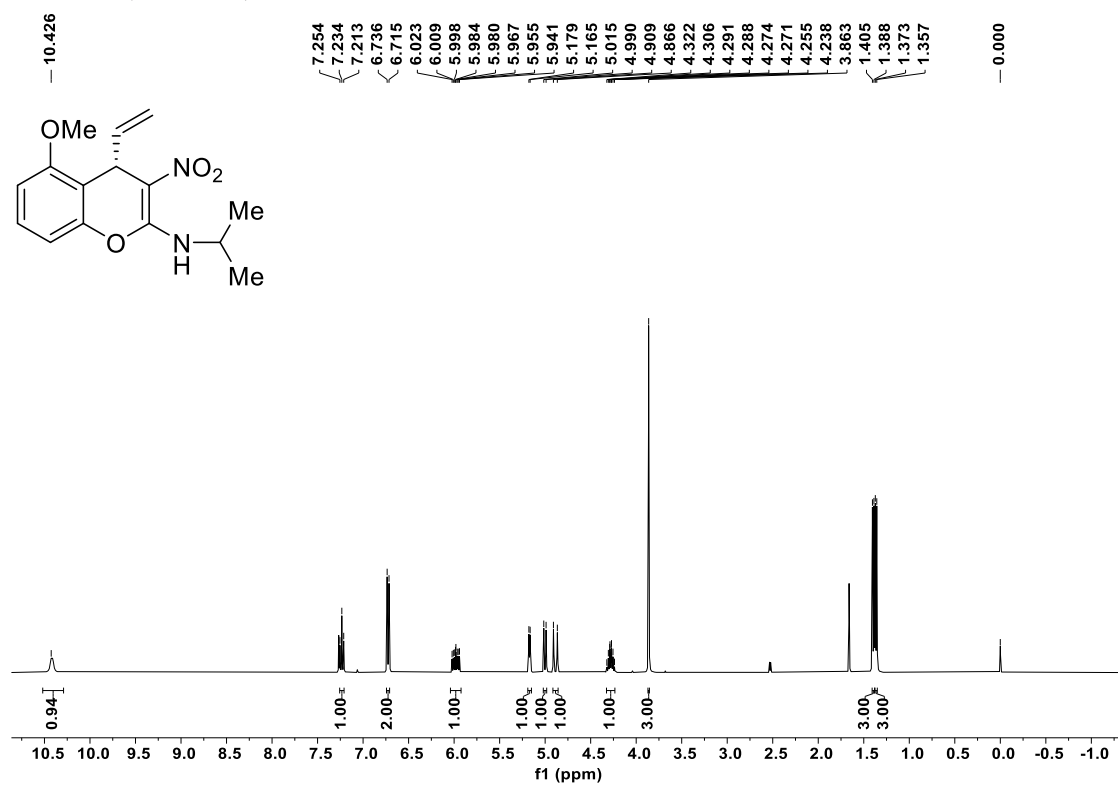

<sup>13</sup>C NMR (100 MHz) of **56** in CDCl<sub>3</sub>

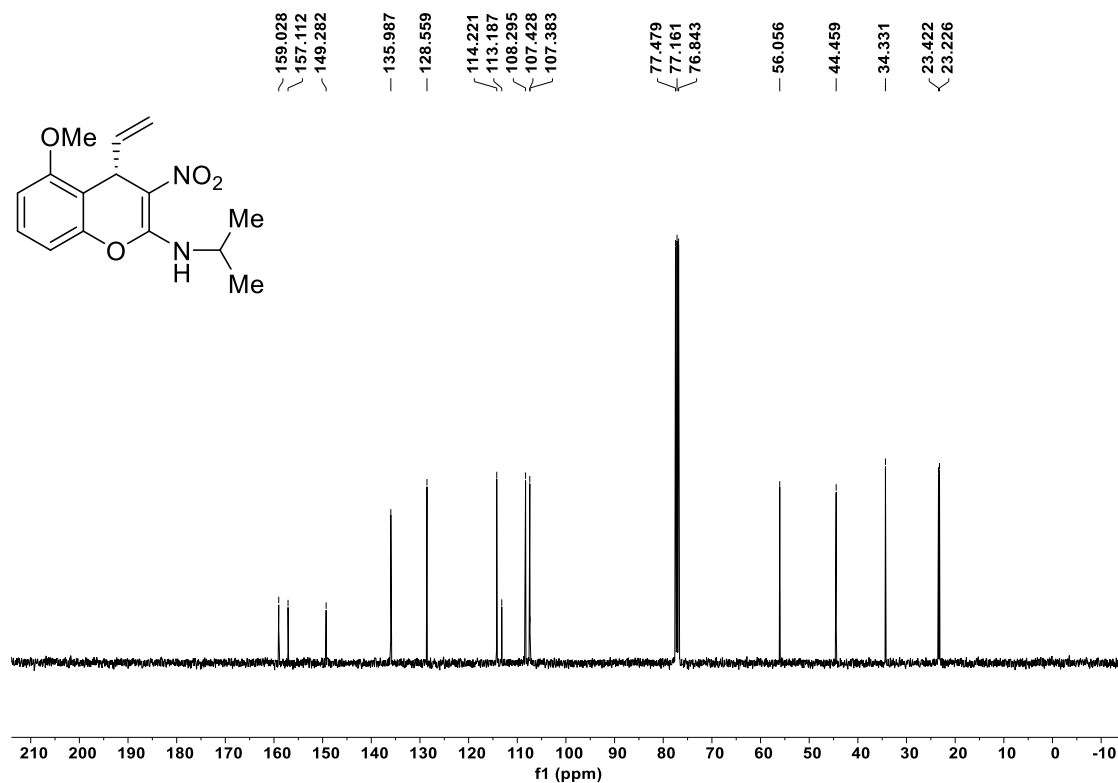

<sup>1</sup>H NMR (400 MHz) of **57** in CDCl<sub>3</sub>

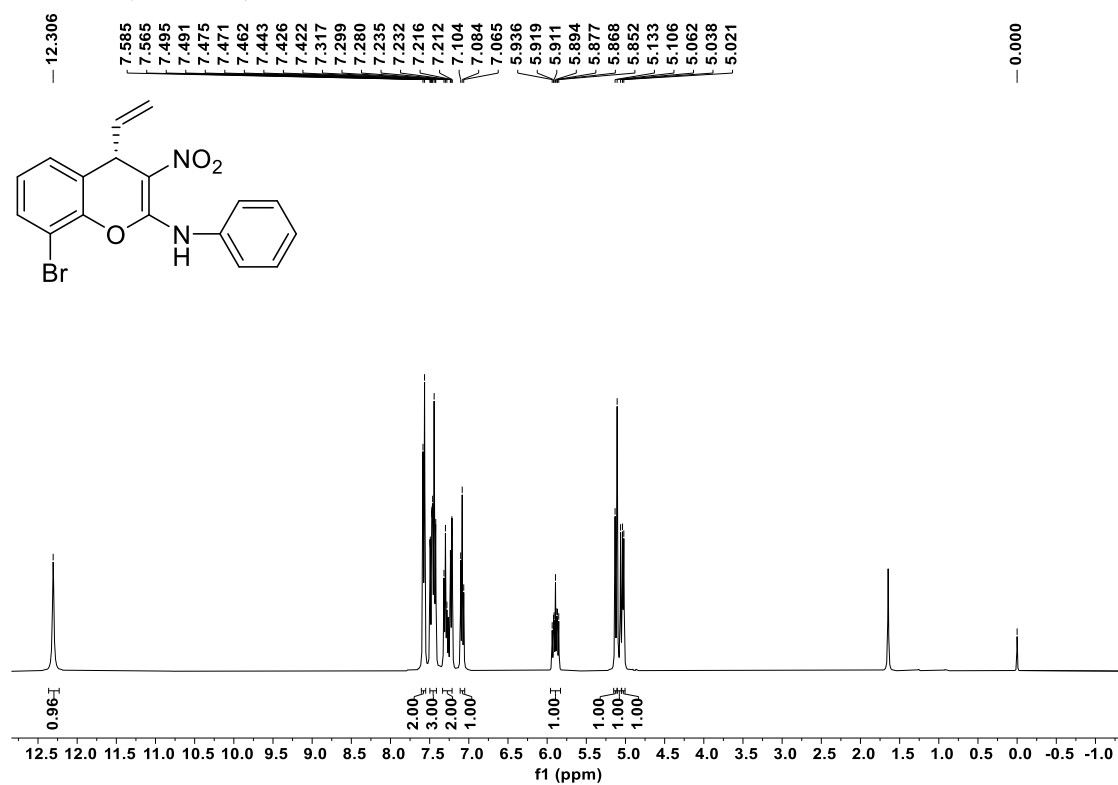

<sup>13</sup>C NMR (100 MHz) of **57** in CDCl<sub>3</sub>

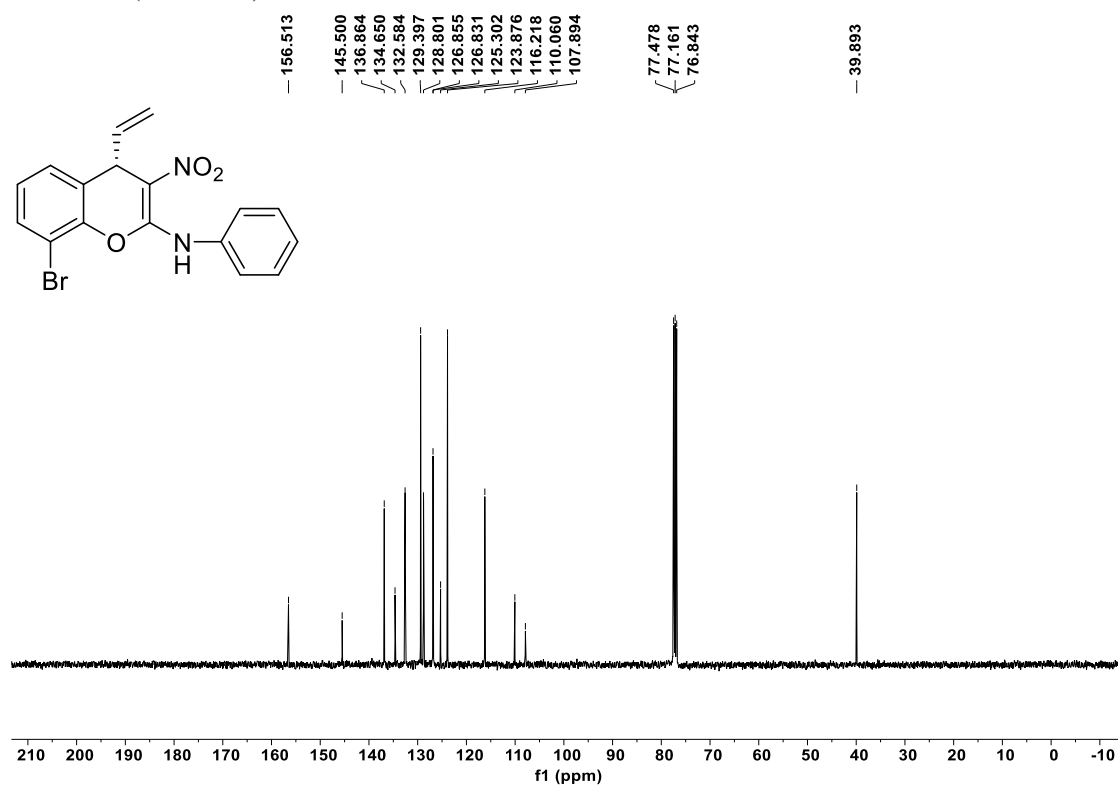

$^1\text{H}$  NMR (400 MHz) of **58** in  $\text{CDCl}_3$

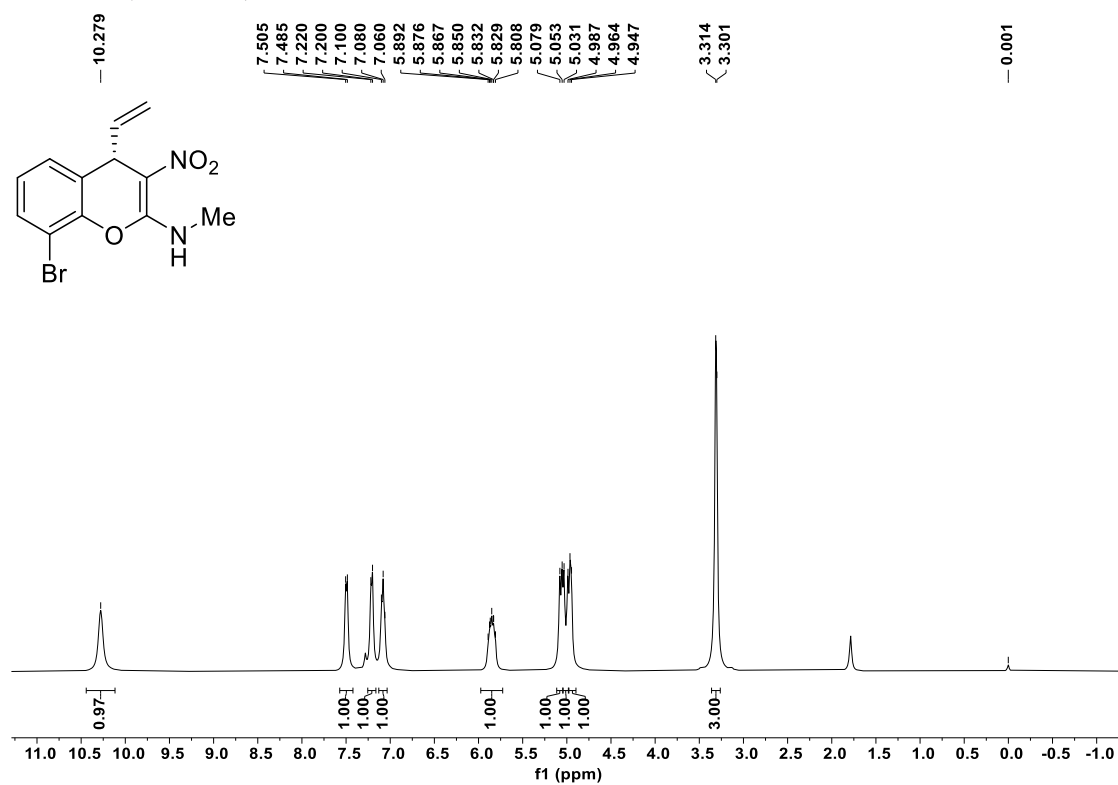

$^{13}\text{C}$  NMR (100 MHz) of **58** in  $\text{CDCl}_3$

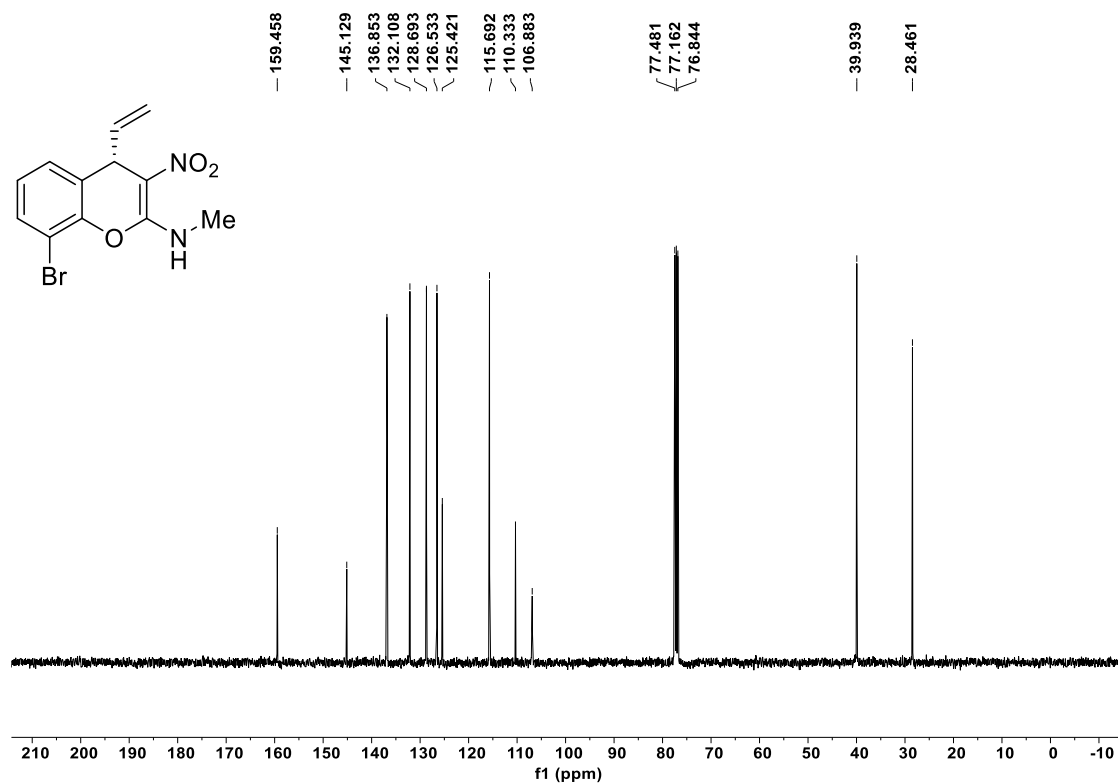

<sup>1</sup>H NMR (400 MHz) of **59** in CDCl<sub>3</sub>

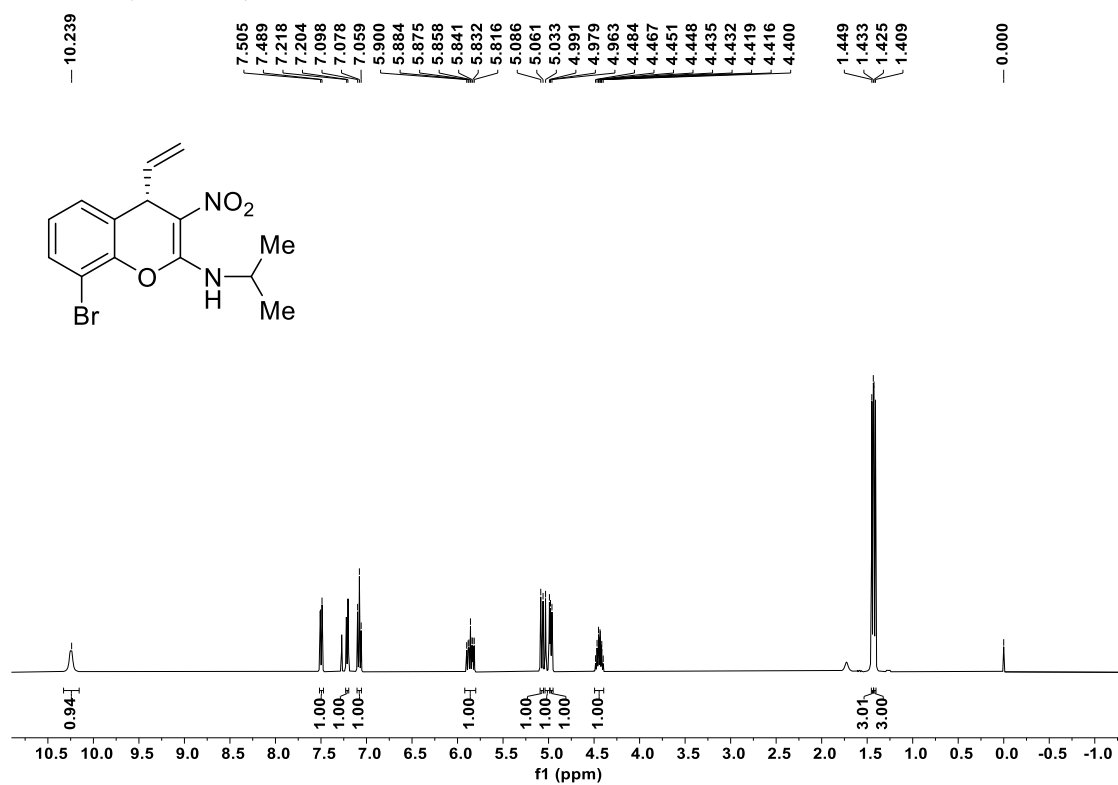

<sup>13</sup>C NMR (100 MHz) of **59** in CDCl<sub>3</sub>

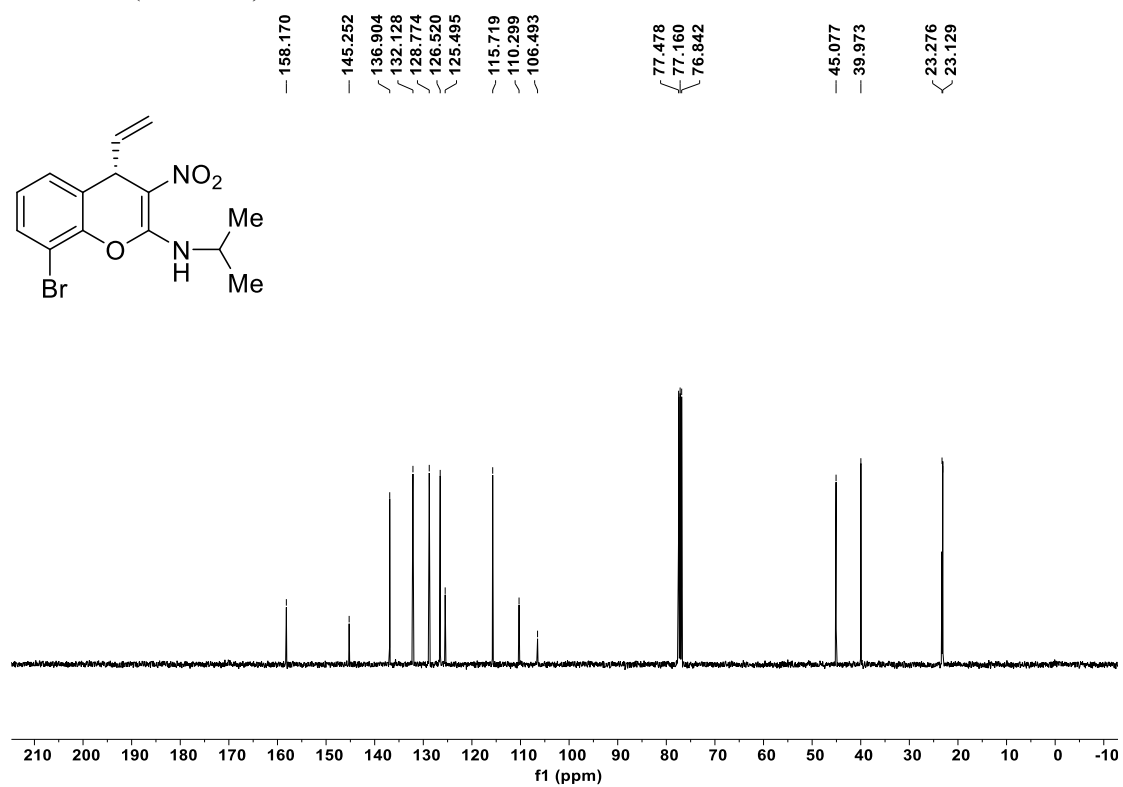

<sup>1</sup>H NMR (400 MHz) of **60** in CDCl<sub>3</sub>

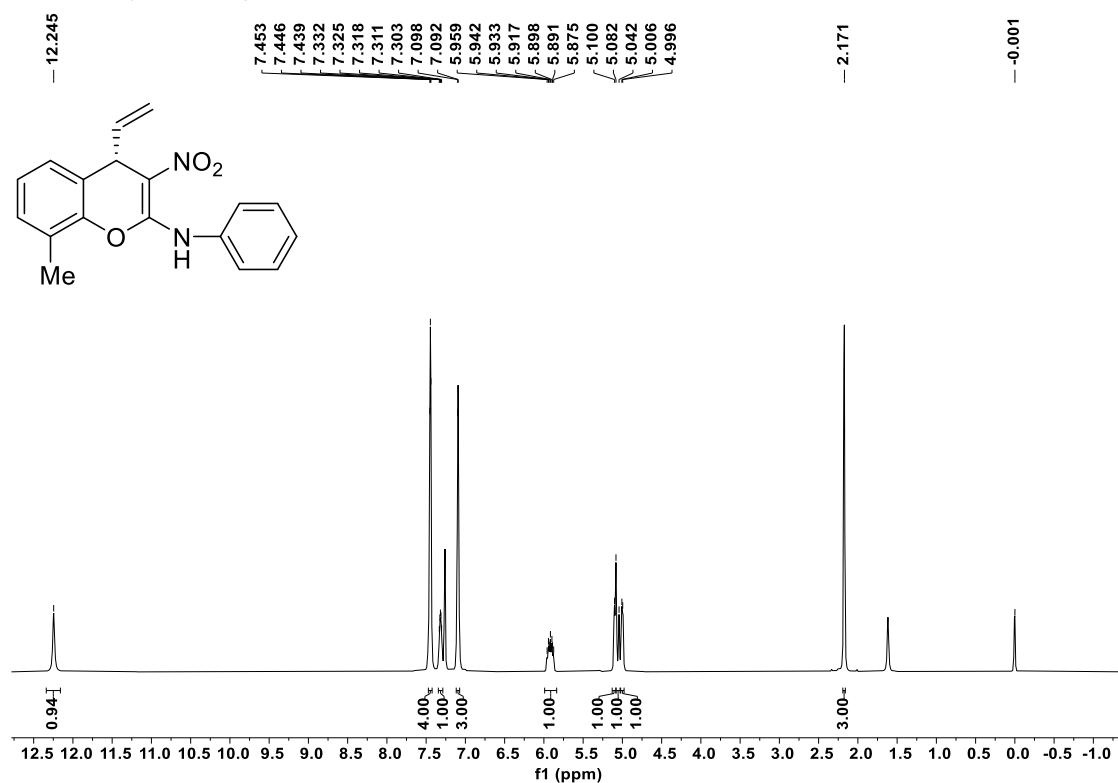

<sup>13</sup>C NMR (100 MHz) of **60** in CDCl<sub>3</sub>

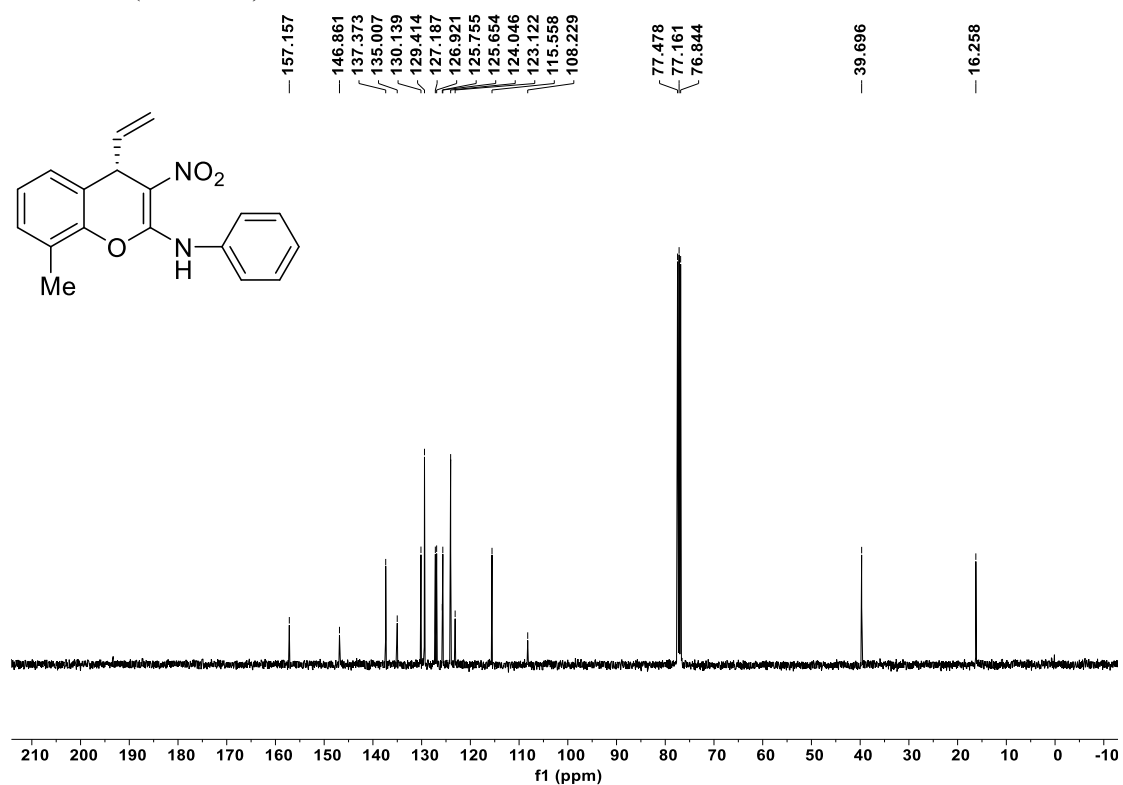



$^1\text{H}$  NMR (400 MHz) of **61** in  $\text{CDCl}_3$

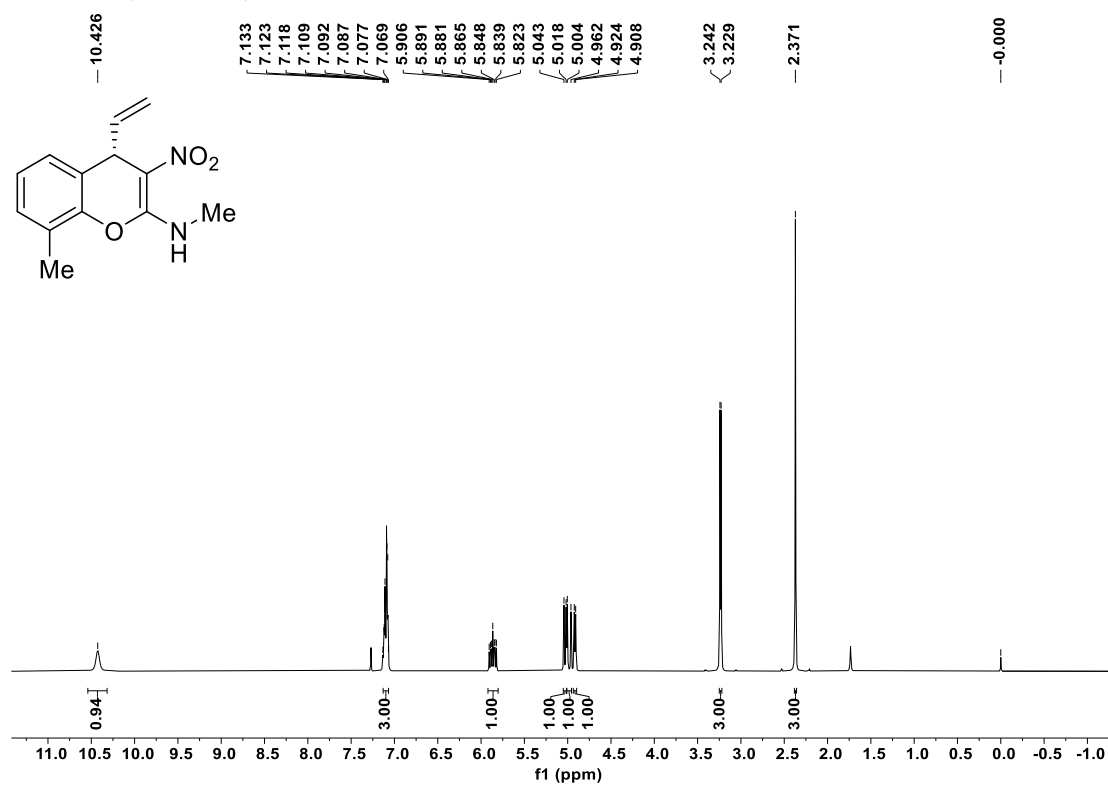

$^{13}\text{C}$  NMR (100 MHz) of **61** in  $\text{CDCl}_3$

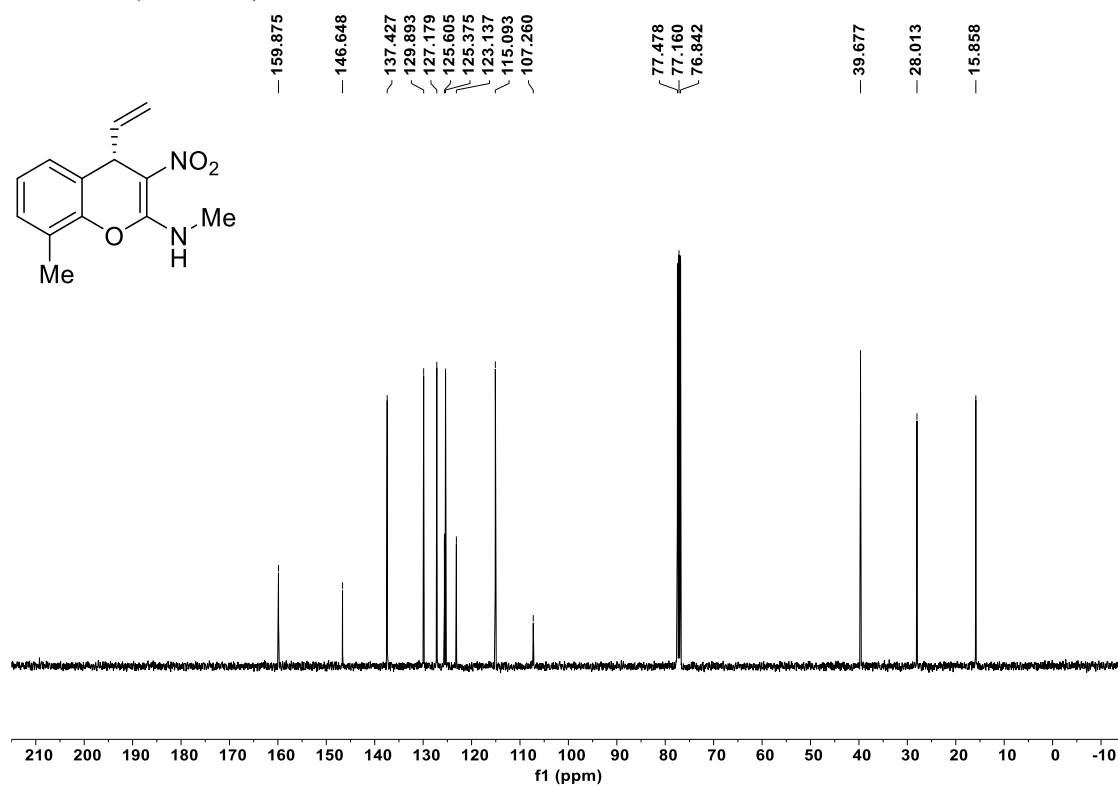

<sup>1</sup>H NMR (400 MHz) of **62** in CDCl<sub>3</sub>

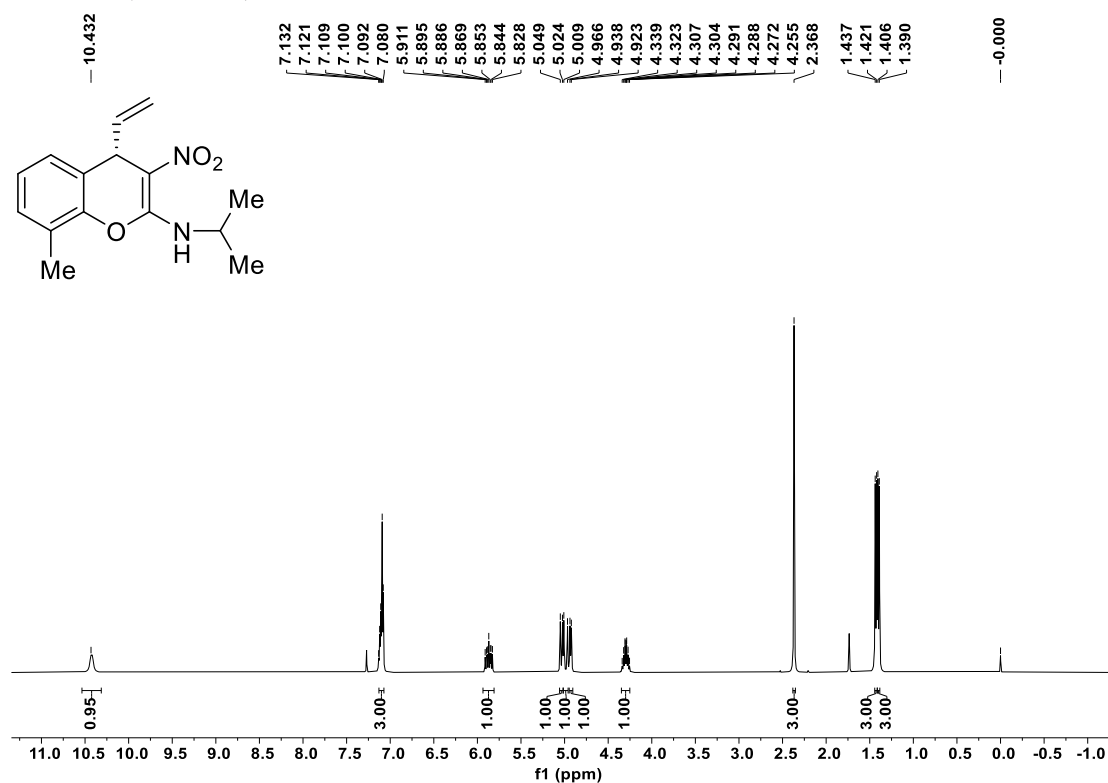

<sup>13</sup>C NMR (100 MHz) of **62** in CDCl<sub>3</sub>

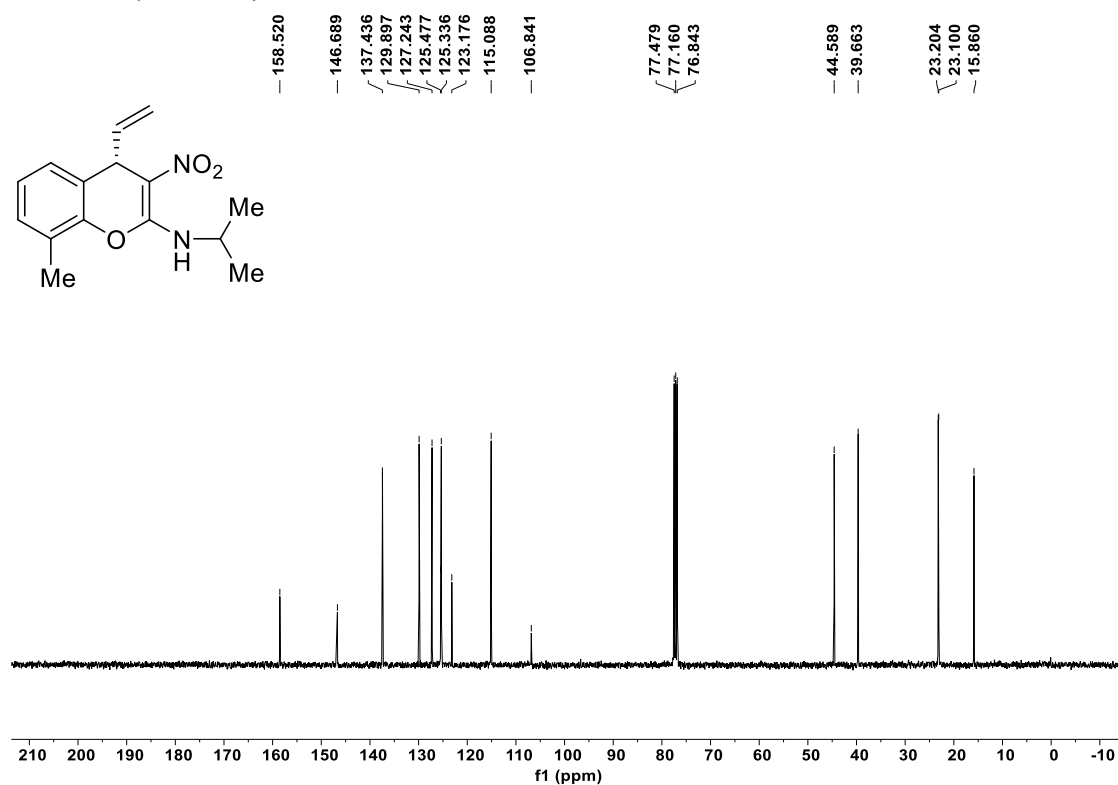

$^1\text{H}$  NMR (400 MHz) of **63** in  $\text{CDCl}_3$

7.232  
7.213  
7.193  
7.162  
7.144  
7.126  
7.108  
7.089  
6.960  
6.940  
5.823  
5.800  
5.779  
5.758  
5.735  
5.244  
5.201  
5.146  
5.122  
4.686  
4.145  
4.124  
-0.000

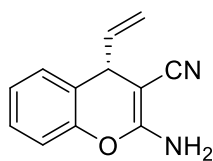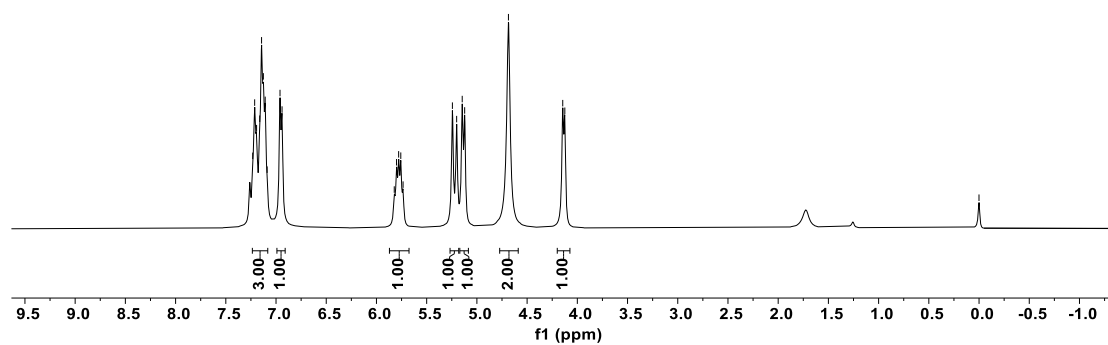

$^{13}\text{C}$  NMR (100 MHz) of **63** in  $\text{CDCl}_3$

159.645  
148.537  
139.658  
129.365  
128.454  
125.003  
121.408  
120.092  
116.463  
115.940  
77.479  
77.161  
76.844  
58.202  
39.491

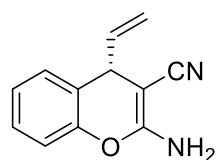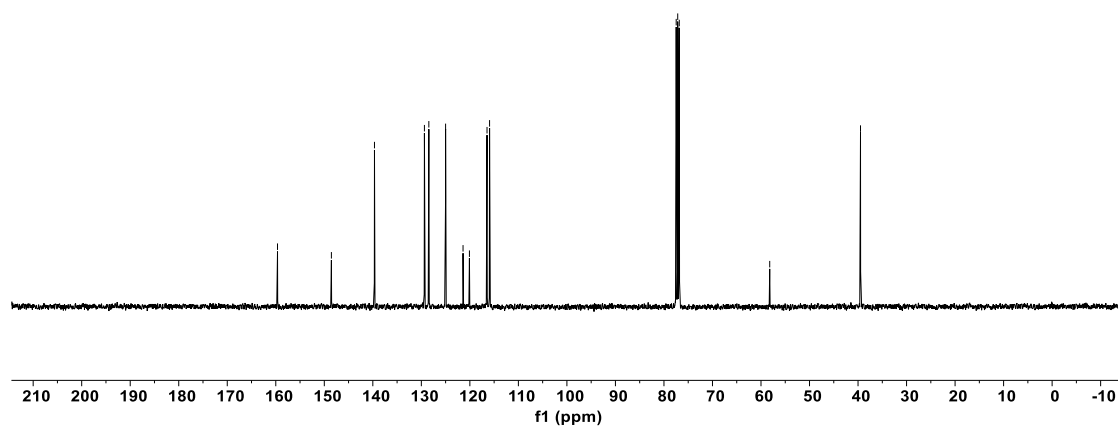

<sup>1</sup>H NMR (400 MHz) of **64** in CDCl<sub>3</sub>

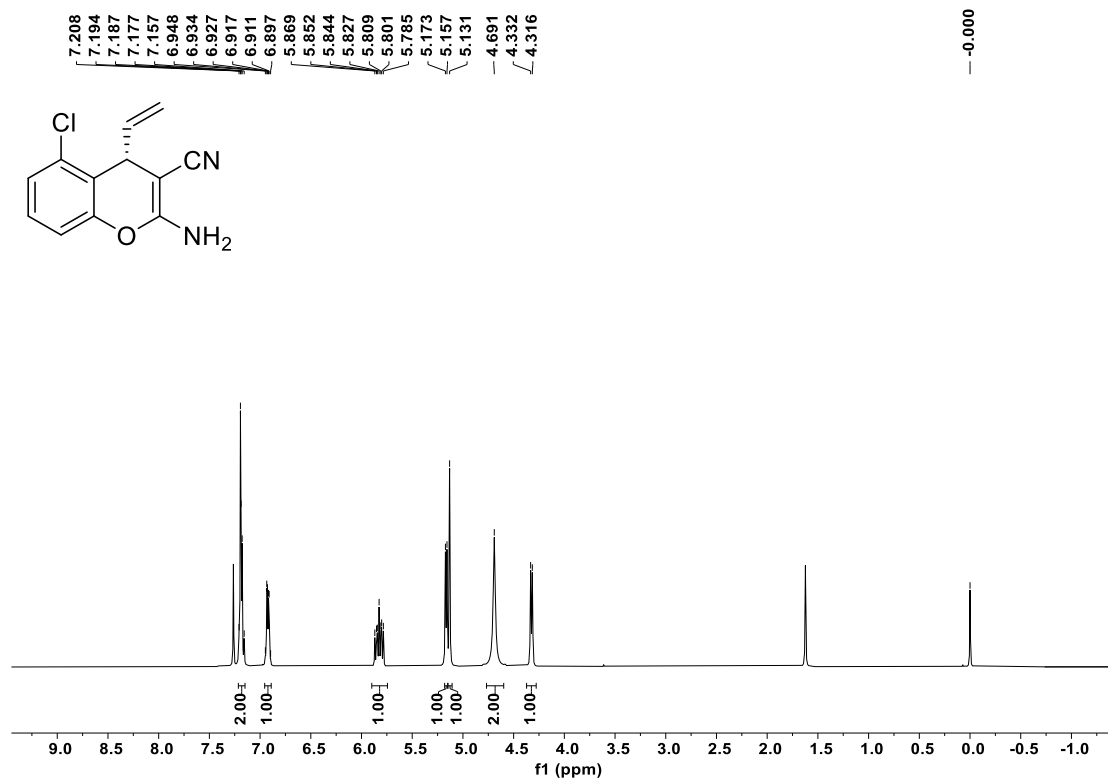

<sup>13</sup>C NMR (100 MHz) of **64** in CDCl<sub>3</sub>

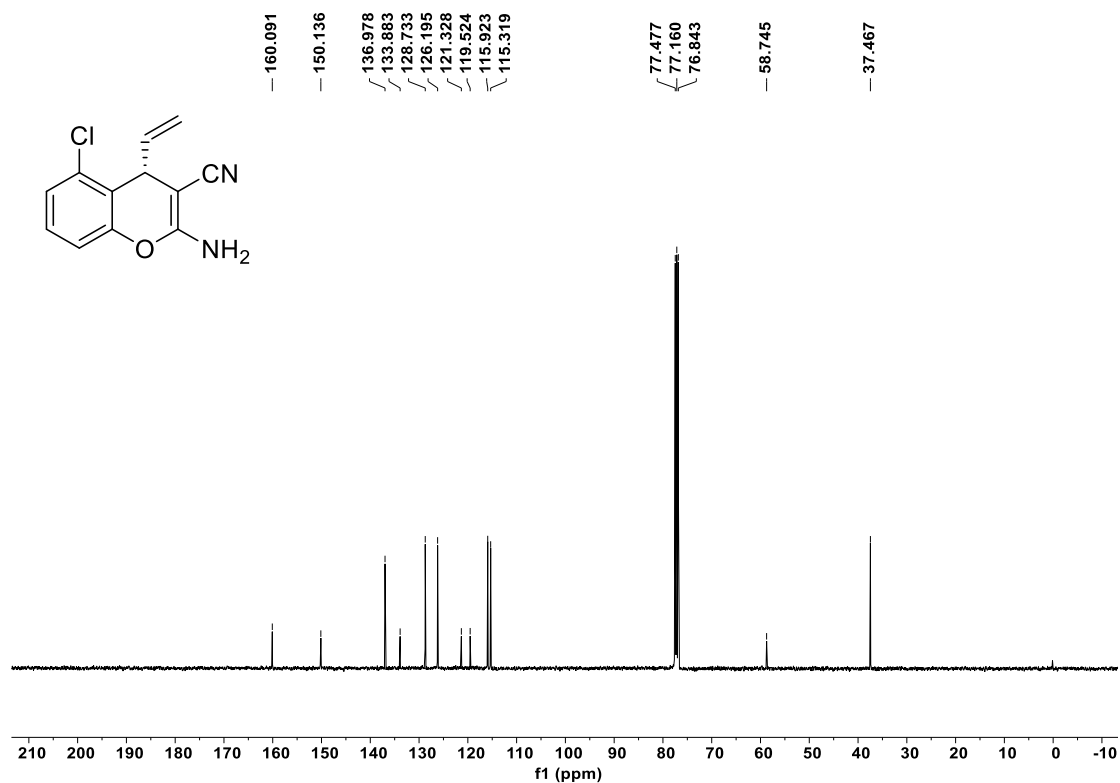

$^1\text{H}$  NMR (400 MHz) of **65** in  $\text{CDCl}_3$

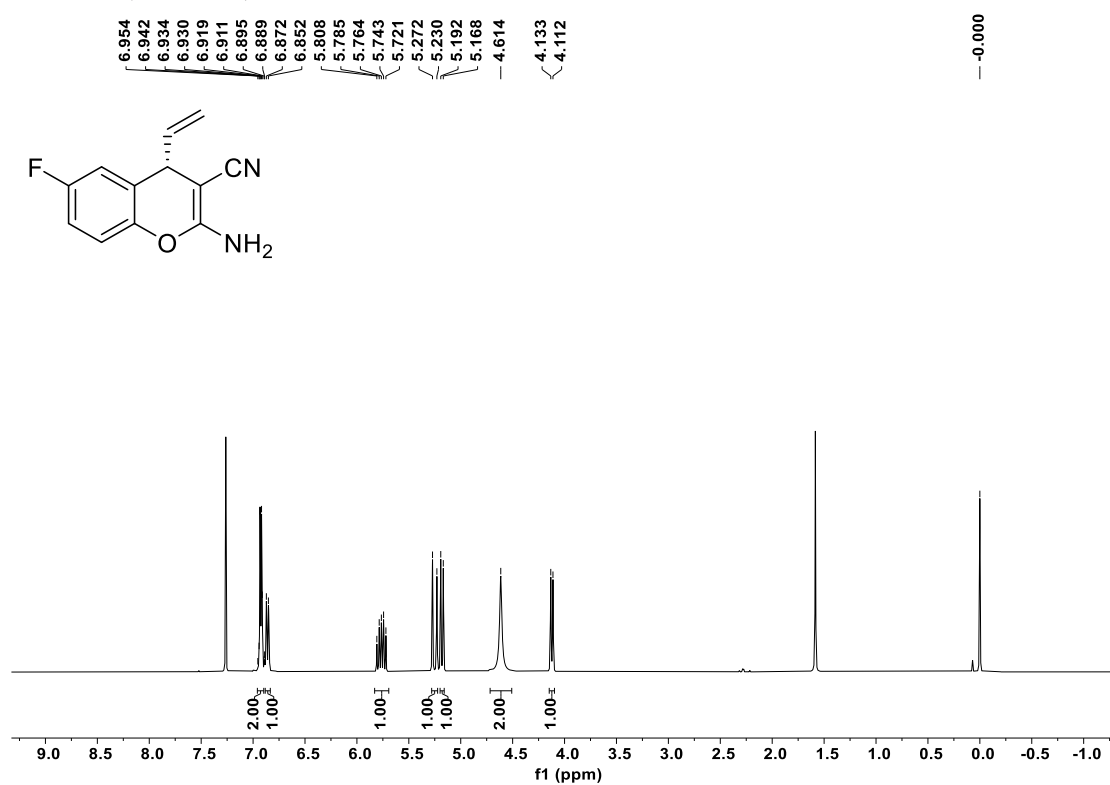

$^{13}\text{C}$  NMR (100 MHz) of **65** in  $\text{CDCl}_3$

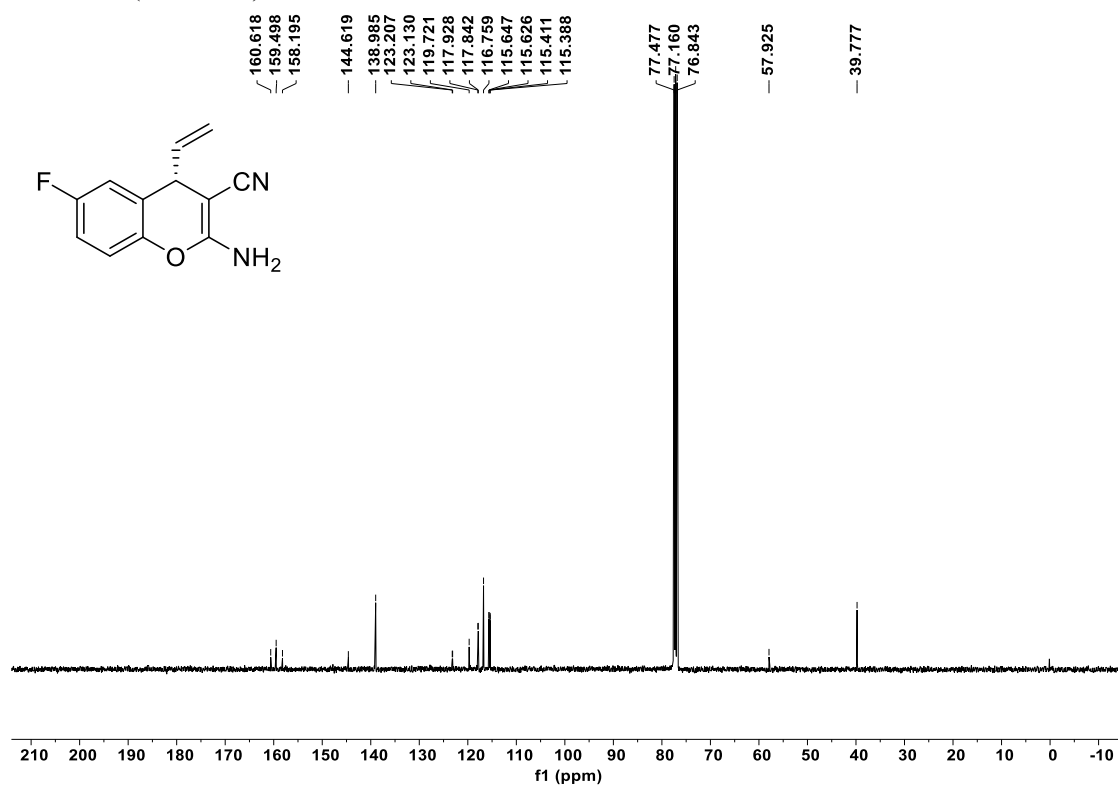

$^{19}\text{F}$  NMR (376 MHz) of **65** in  $\text{CDCl}_3$

-117.335  
-117.352  
-117.369  
-117.375  
-117.391

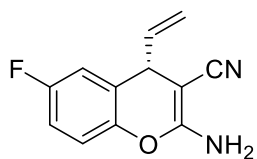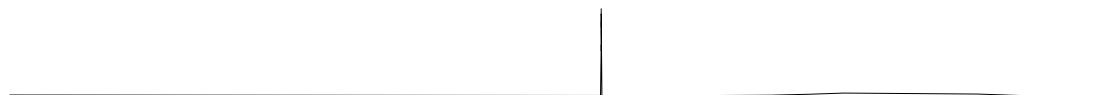

-10 -20 -30 -40 -50 -60 -70 -80 -90 -100 -110 -120 -130 -140 -150 -160 -170 -180 -190 -200 -210  
f1 (ppm)

$^1\text{H}$  NMR (400 MHz) of **66** in  $\text{CDCl}_3$

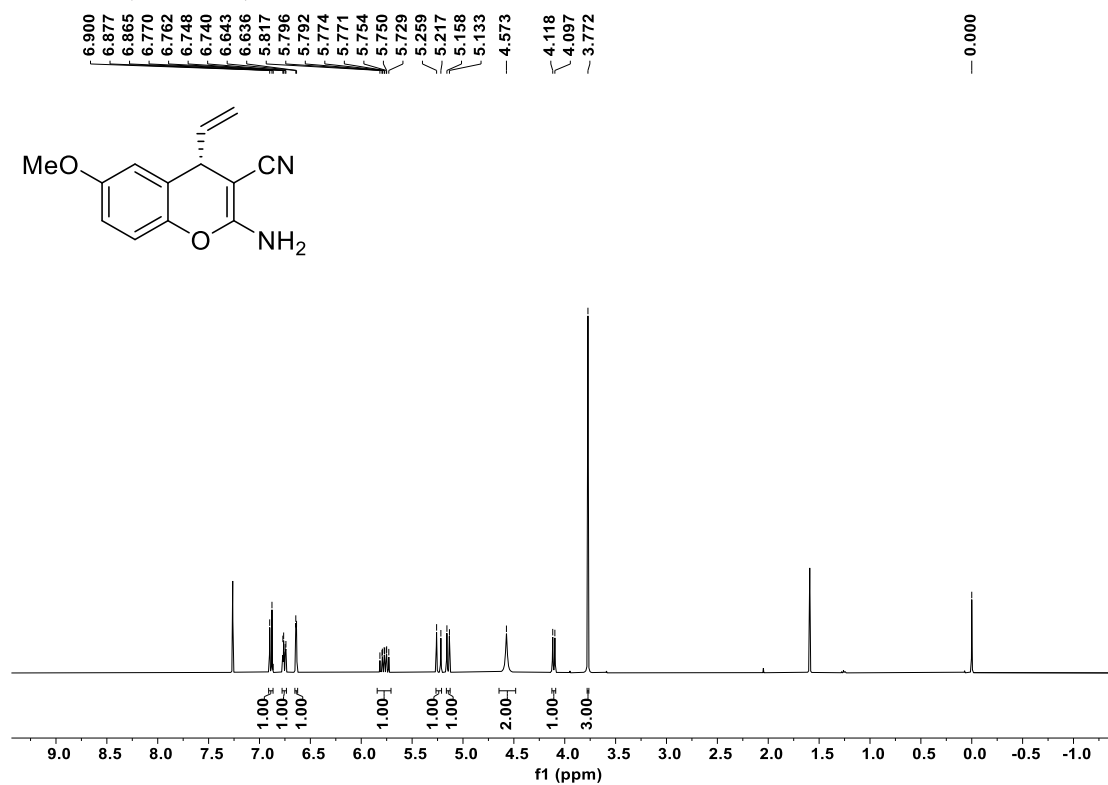

$^{13}\text{C}$  NMR (100 MHz) of **66** in  $\text{CDCl}_3$

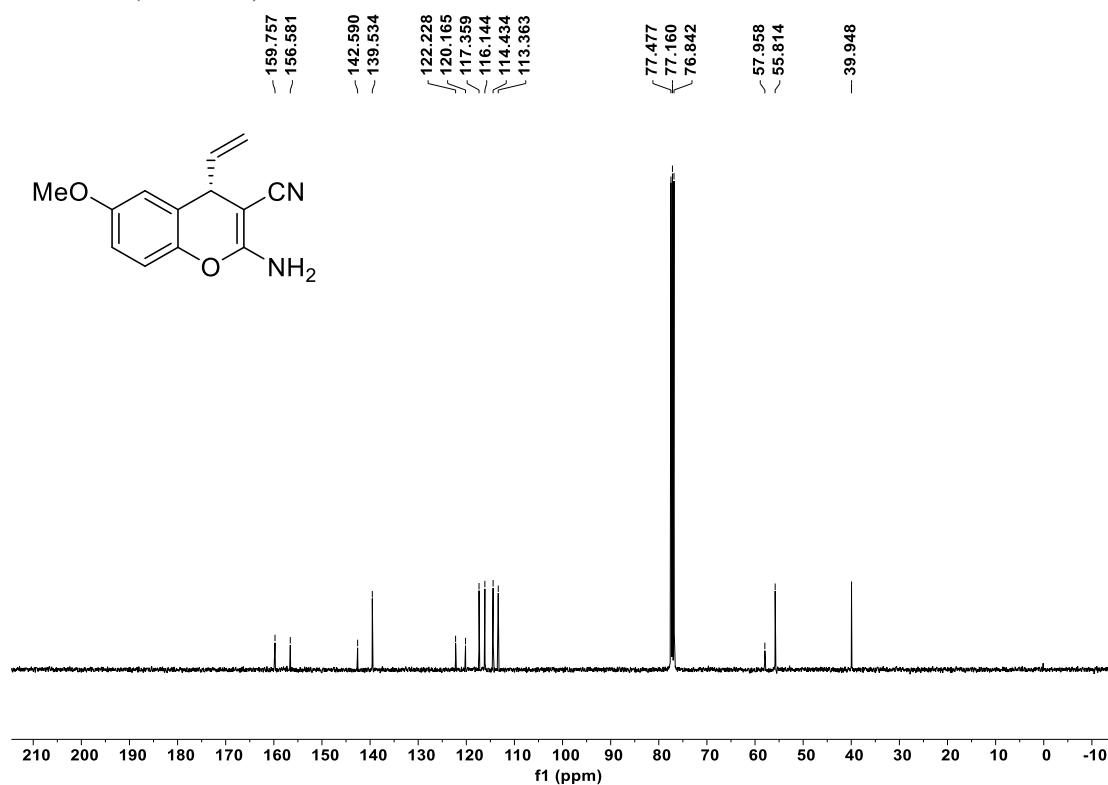

<sup>1</sup>H NMR (400 MHz) of **67** in CDCl<sub>3</sub>

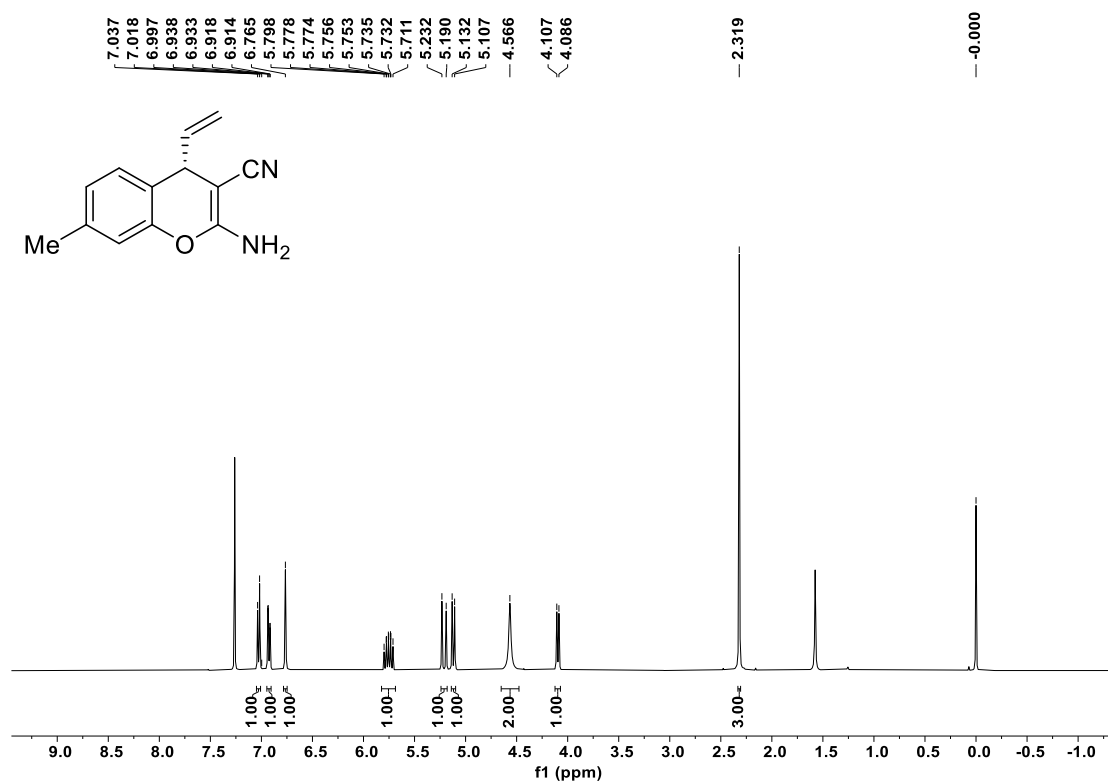

<sup>13</sup>C NMR (100 MHz) of **67** in CDCl<sub>3</sub>

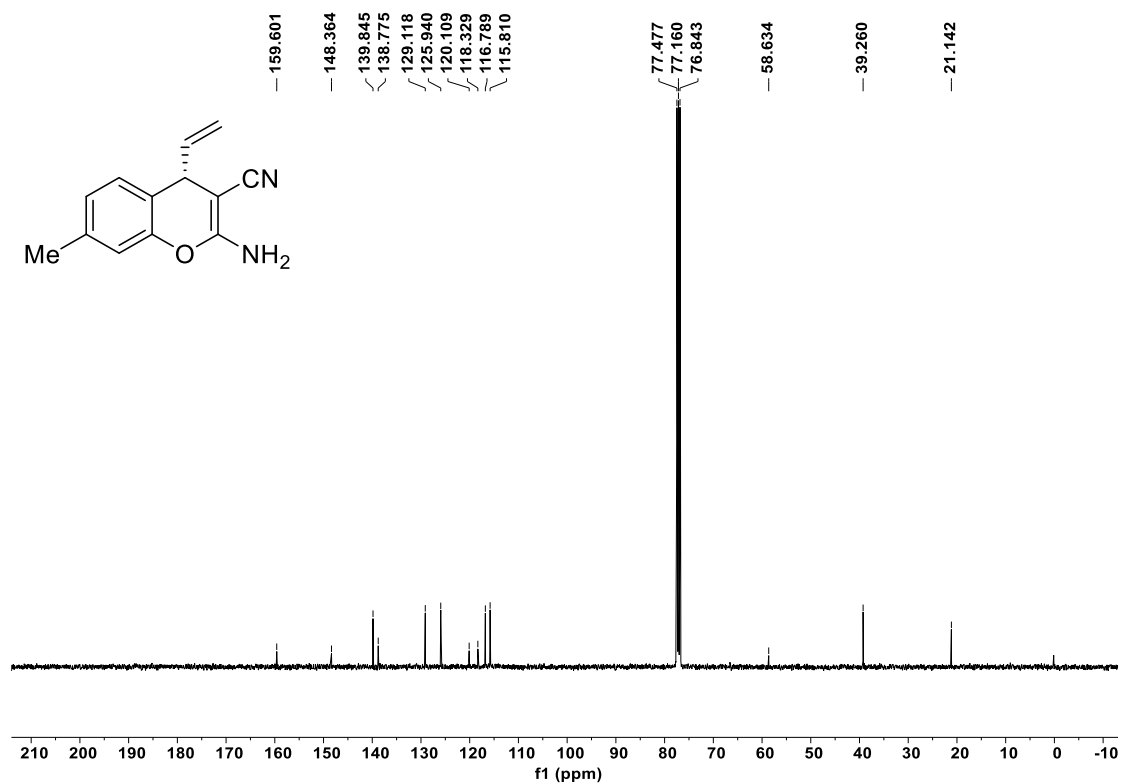



<sup>1</sup>H NMR (400 MHz) of **68** in CDCl<sub>3</sub>

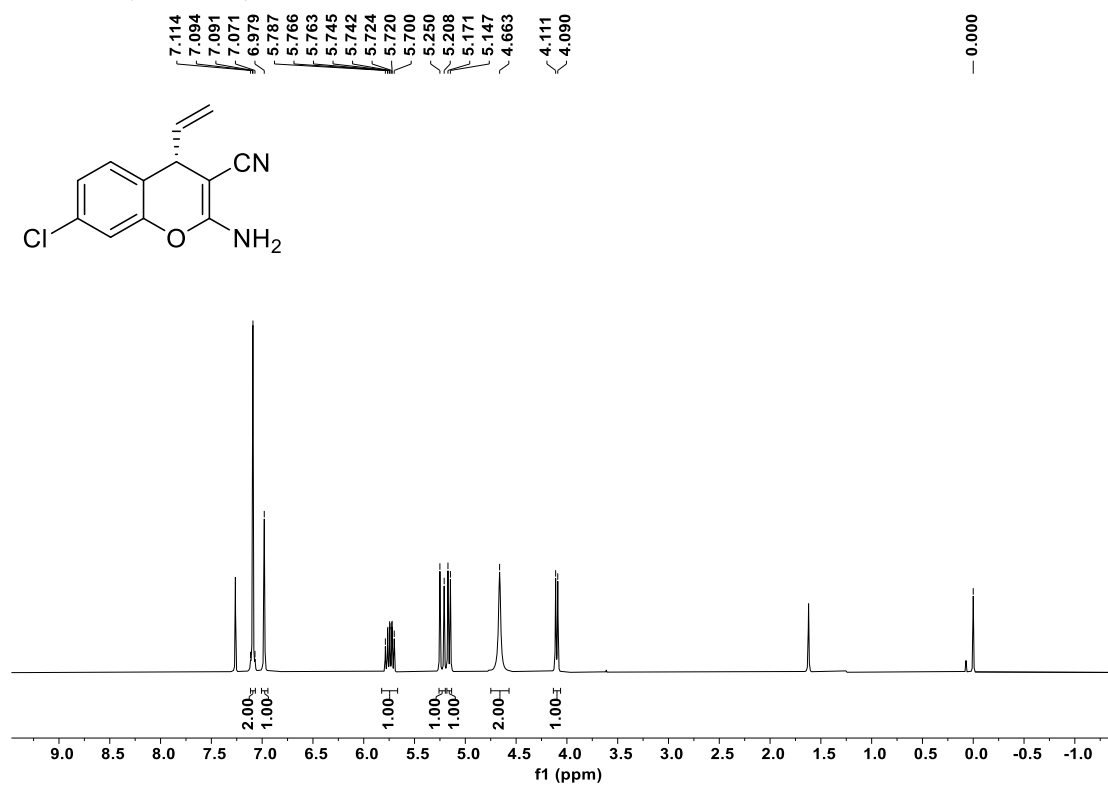

<sup>13</sup>C NMR (100 MHz) of **68** in CDCl<sub>3</sub>

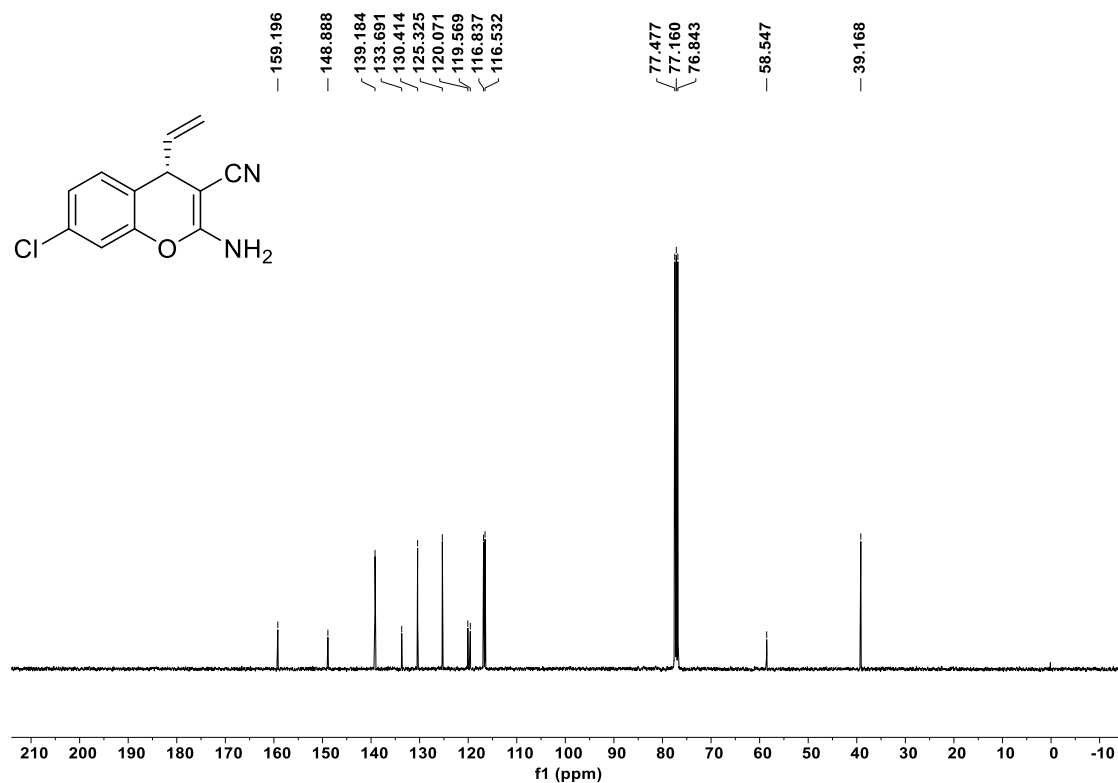

<sup>1</sup>H NMR (400 MHz) of **69** in CDCl<sub>3</sub>

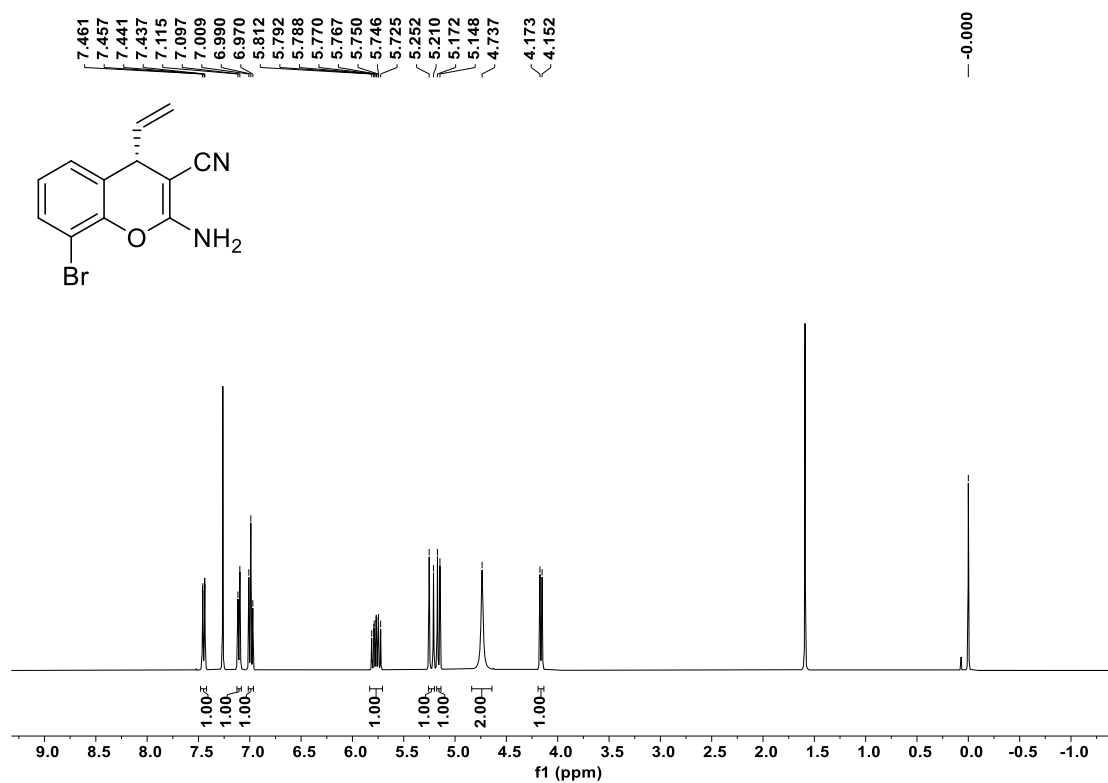

<sup>13</sup>C NMR (100 MHz) of **69** in CDCl<sub>3</sub>

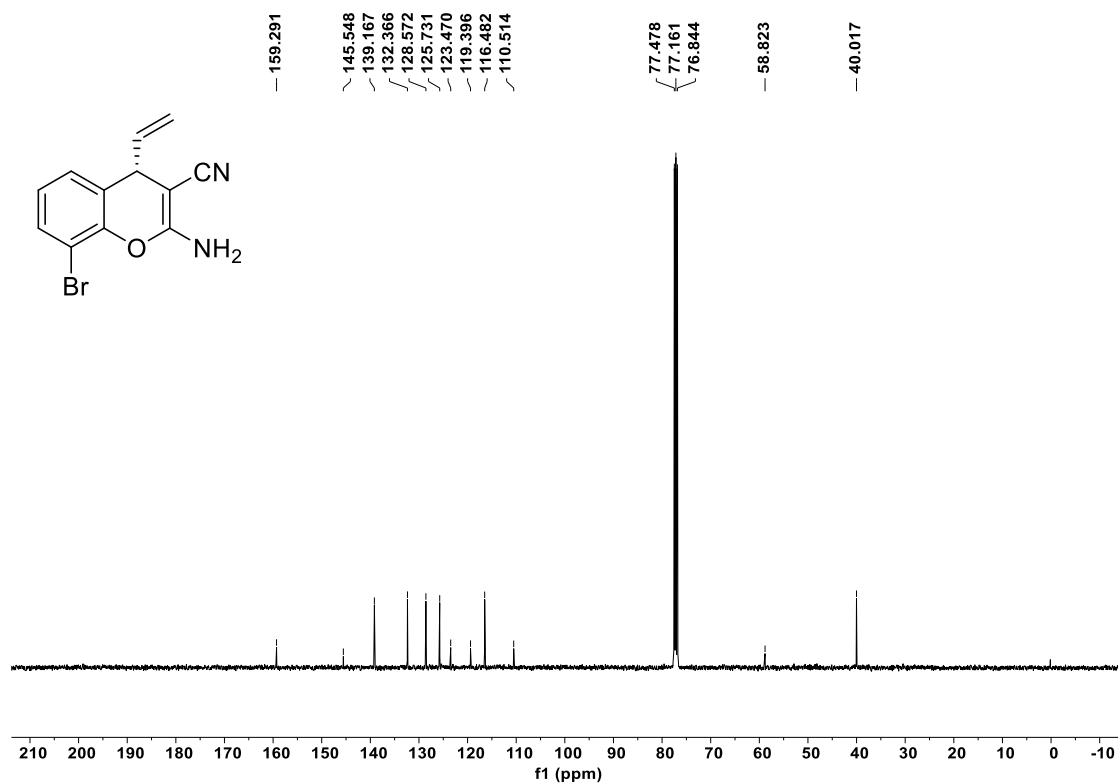

<sup>1</sup>H NMR (400 MHz) of **70** in CDCl<sub>3</sub>

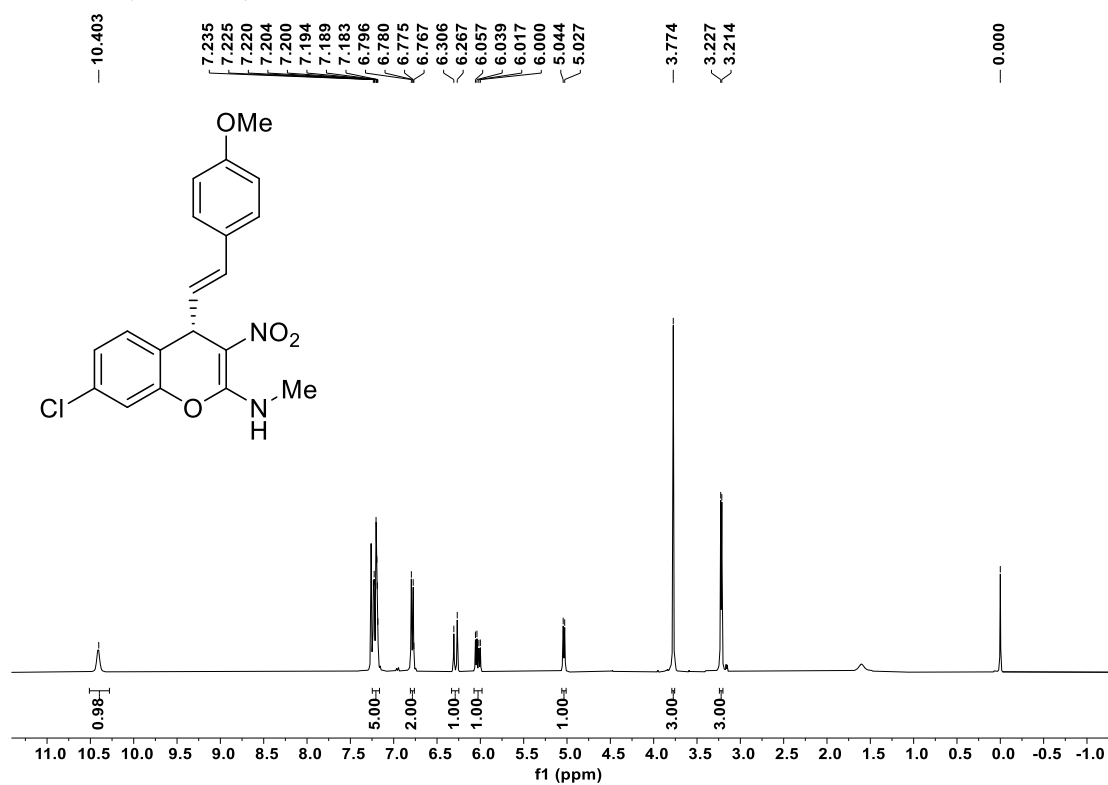

<sup>1</sup>H NMR (400 MHz) of **70** in CDCl<sub>3</sub>

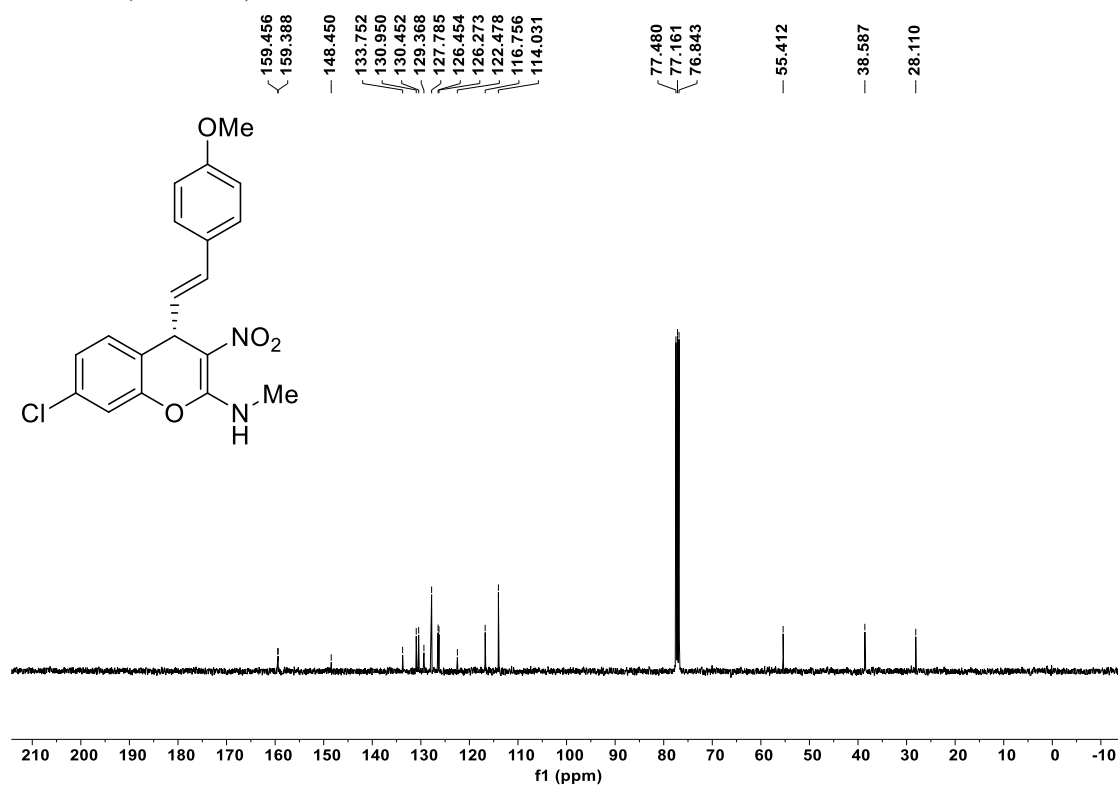

$^1\text{H}$  NMR (400 MHz) of **71** in  $\text{CDCl}_3$  (6:1 dr)

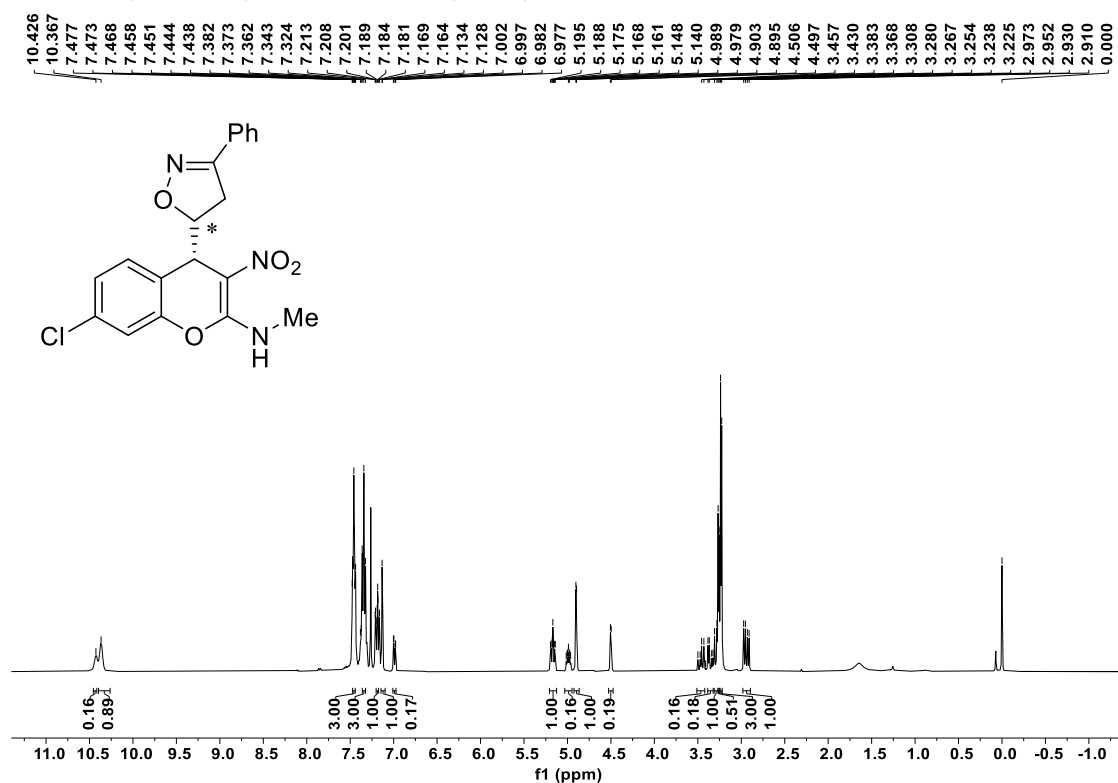

$^1\text{H}$  NMR (400 MHz) of **71** in  $\text{CDCl}_3$  (6:1 dr)

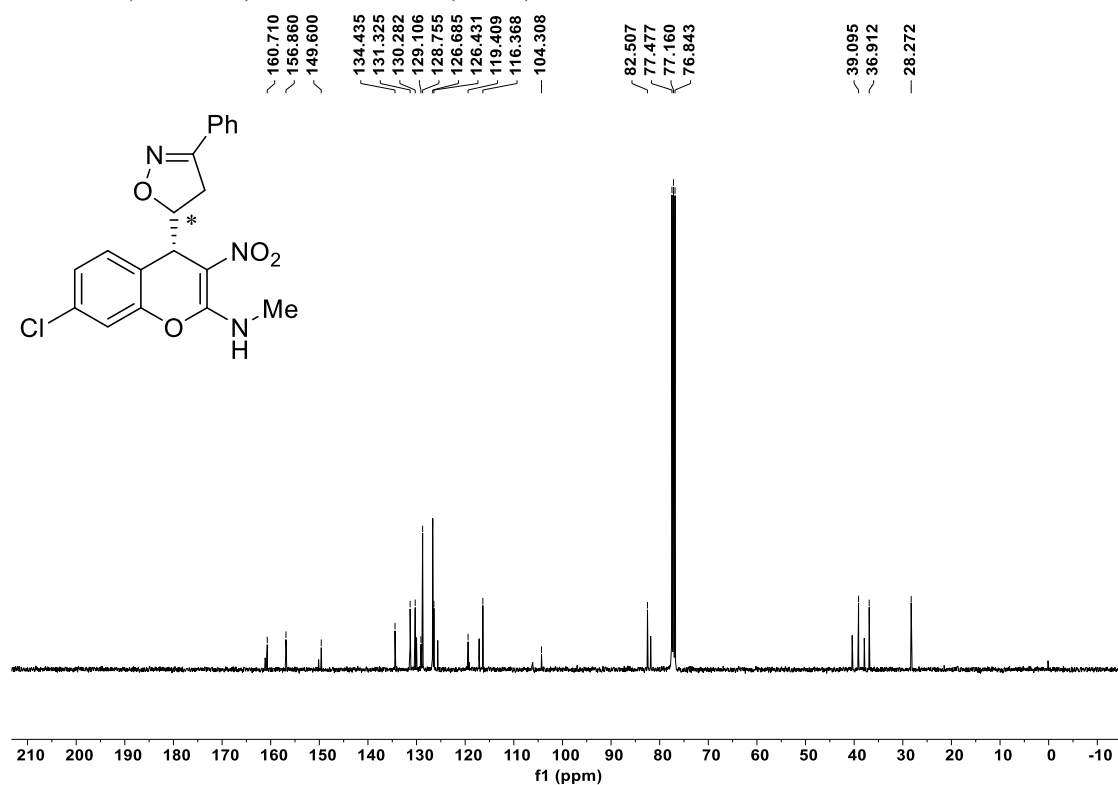

## 9. HPLC Chromatograms

HPLC chromatogram of compound **3** (96% ee)

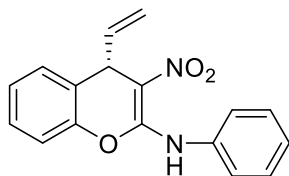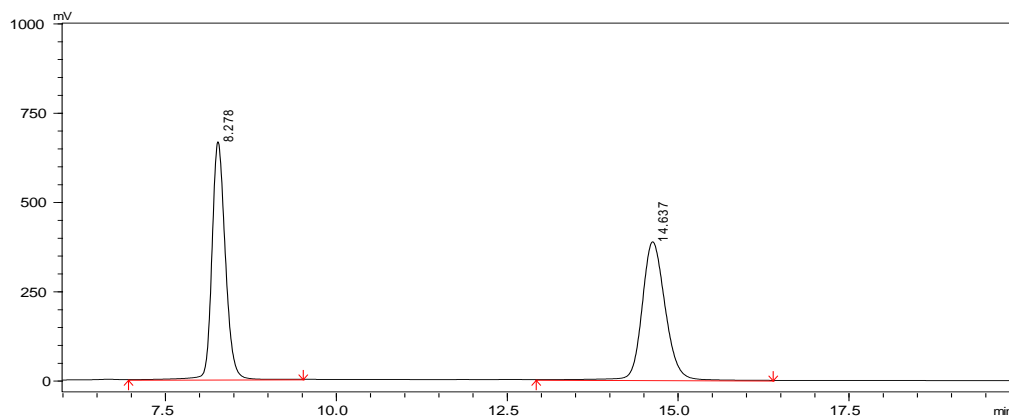

| #     | Ret Time (min) | Height ( $\mu\text{V}$ ) | Area ( $\mu\text{V}\cdot\text{sec}$ ) | Area (%) |
|-------|----------------|--------------------------|---------------------------------------|----------|
| 1     | 8.278          | 665368                   | 9061535                               | 50.084   |
| 2     | 14.637         | 386812                   | 9031009                               | 49.916   |
| total |                | 1052180                  | 18092545                              | 100.000  |

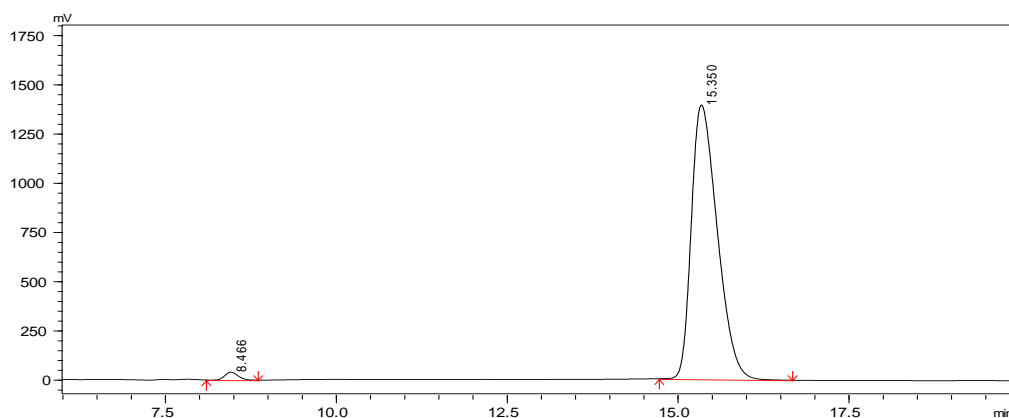

| #     | Ret Time (min) | Height ( $\mu\text{V}$ ) | Area ( $\mu\text{V}\cdot\text{sec}$ ) | Area (%) |
|-------|----------------|--------------------------|---------------------------------------|----------|
| 1     | 8.466          | 40142                    | 535279                                | 1.434    |
| 2     | 15.350         | 1393668                  | 36781912                              | 98.566   |
| total |                | 1433810                  | 37317191                              | 100.000  |

HPLC chromatogram of compound **4** (95% ee)

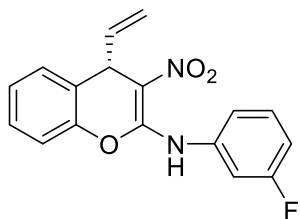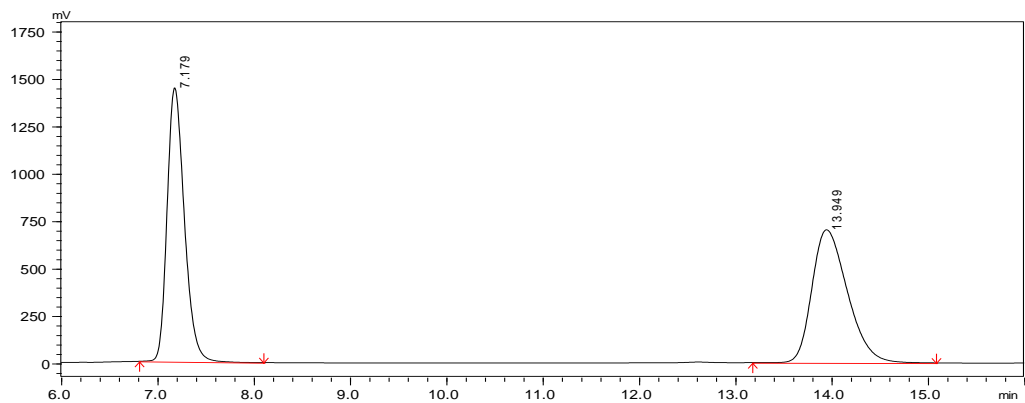

| #     | Ret Time (min) | Height (μV) | Area (μV.sec) | Area (%) |
|-------|----------------|-------------|---------------|----------|
| 1     | 7.179          | 1443052     | 17958905      | 50.020   |
| 2     | 13.949         | 701107      | 17944632      | 49.980   |
| total |                | 2144159     | 35903537      | 100.000  |

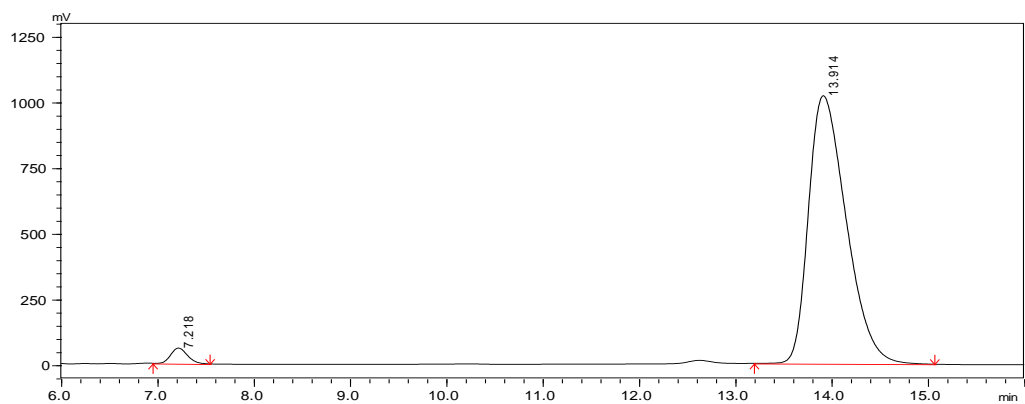

| #     | Ret Time (min) | Height (μV) | Area (μV.sec) | Area (%) |
|-------|----------------|-------------|---------------|----------|
| 1     | 7.218          | 59046       | 704580        | 2.478    |
| 2     | 13.914         | 1019996     | 27731713      | 97.522   |
| total |                | 1079042     | 28436293      | 100.000  |

HPLC chromatogram of compound **5** (89% ee)

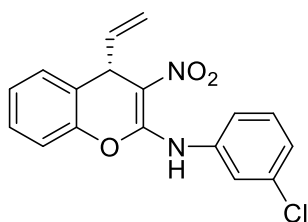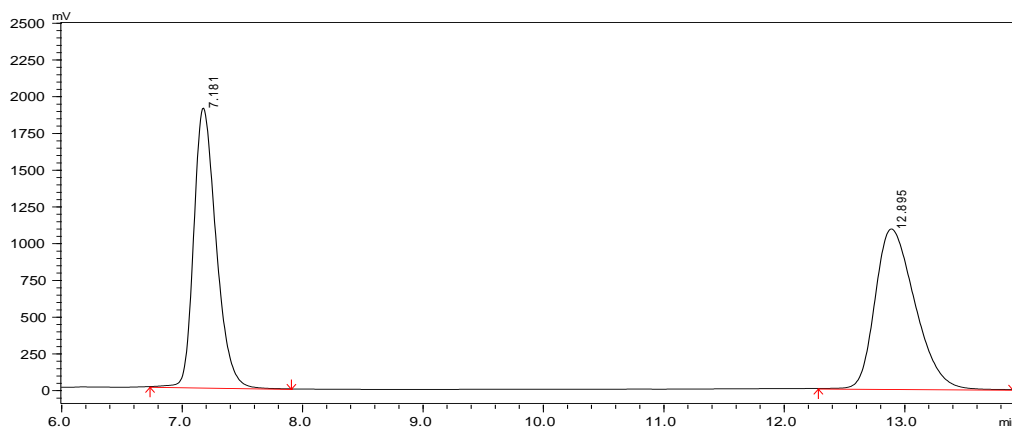

| #     | Ret Time (min) | Height (μV) | Area (μV.sec) | Area (%) |
|-------|----------------|-------------|---------------|----------|
| 1     | 7.181          | 1900463     | 24467001      | 49.594   |
| 2     | 12.895         | 1087398     | 24867959      | 50.406   |
| total |                | 2987861     | 49334960      | 100.000  |

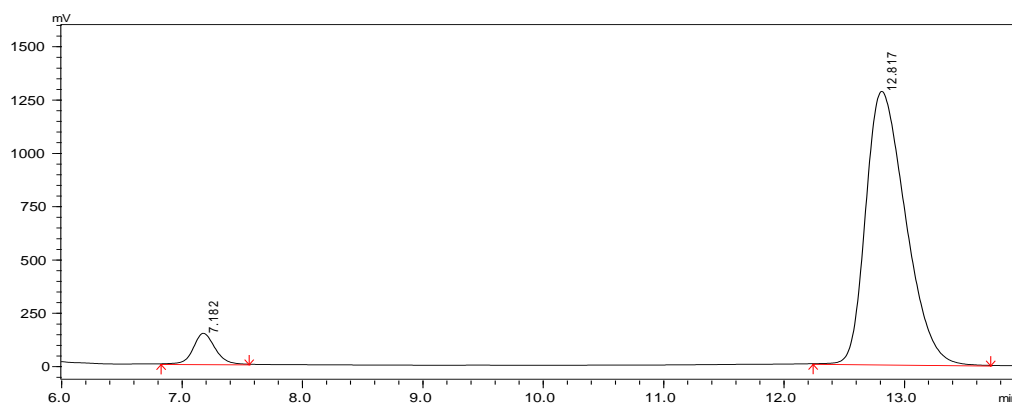

| #     | Ret Time (min) | Height (μV) | Area (μV.sec) | Area (%) |
|-------|----------------|-------------|---------------|----------|
| 1     | 7.182          | 144067      | 1777913       | 5.713    |
| 2     | 12.817         | 1280006     | 29341512      | 94.287   |
| total |                | 1424073     | 31119425      | 100.000  |

HPLC chromatogram of compound **6** (90% ee)

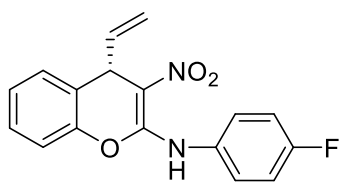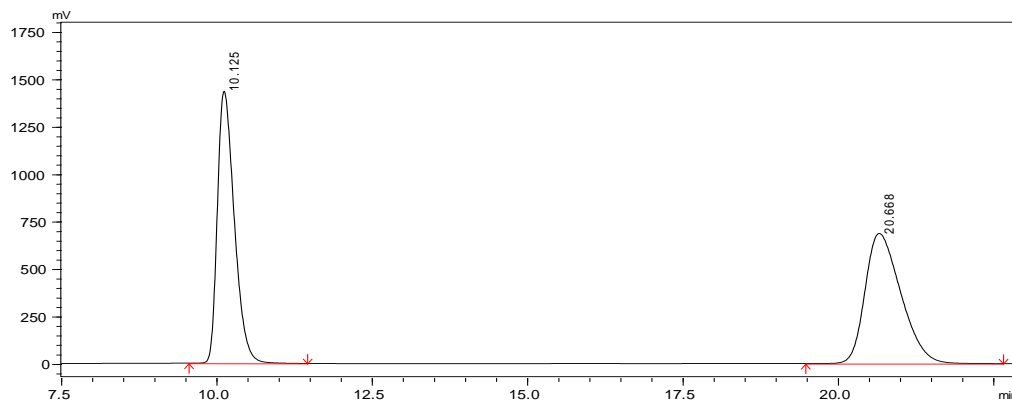

| #     | Ret Time (min) | Height (μV) | Area (μV.sec) | Area (%) |
|-------|----------------|-------------|---------------|----------|
| 1     | 10.125         | 1434833     | 27226993      | 49.821   |
| 2     | 20.668         | 685887      | 27422931      | 50.179   |
| total |                | 2120720     | 54649924      | 100.000  |

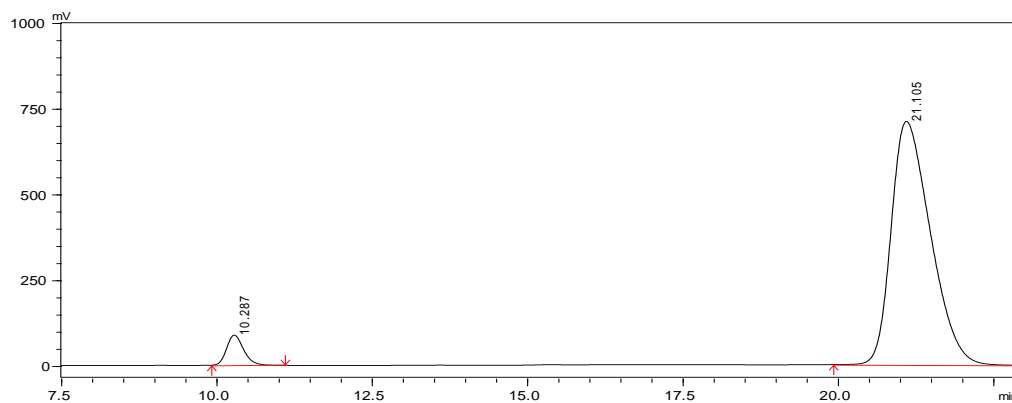

| #     | Ret Time (min) | Height (μV) | Area (μV.sec) | Area (%) |
|-------|----------------|-------------|---------------|----------|
| 1     | 10.287         | 87008       | 1585724       | 4.839    |
| 2     | 21.105         | 710257      | 31186276      | 95.161   |
| total |                | 797265      | 32772000      | 100.000  |



HPLC chromatogram of compound 7 (94% ee)

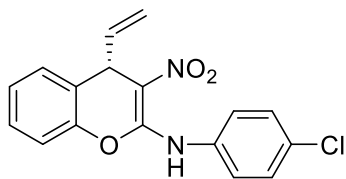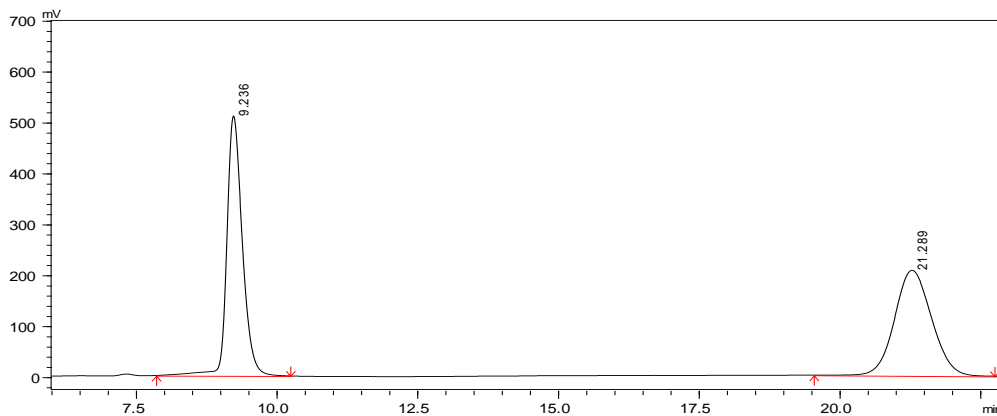

| #     | Ret Time (min) | Height ( $\mu\text{V}$ ) | Area ( $\mu\text{V}\cdot\text{sec}$ ) | Area (%) |
|-------|----------------|--------------------------|---------------------------------------|----------|
| 1     | 9.236          | 510279                   | 9786964                               | 50.926   |
| 2     | 21.289         | 206995                   | 9431192                               | 49.074   |
| total |                | 717274                   | 19218156                              | 100.000  |

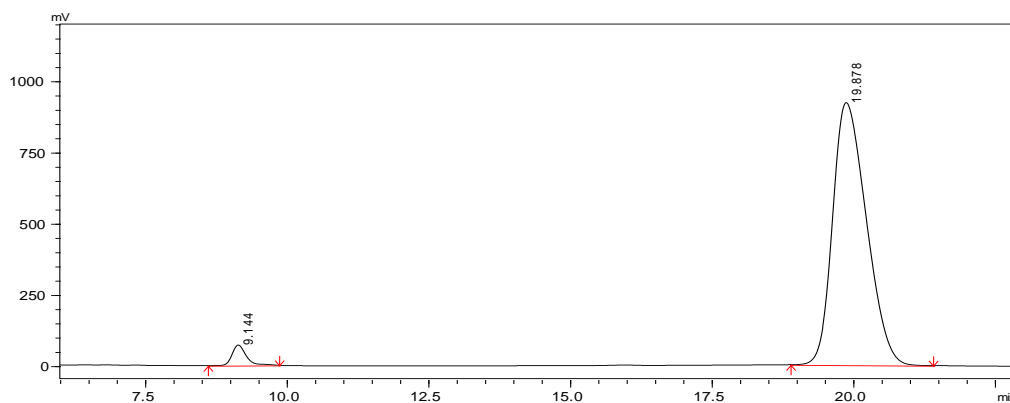

| #     | Ret Time (min) | Height ( $\mu\text{V}$ ) | Area ( $\mu\text{V}\cdot\text{sec}$ ) | Area (%) |
|-------|----------------|--------------------------|---------------------------------------|----------|
| 1     | 9.144          | 71688                    | 1241611                               | 3.158    |
| 2     | 19.878         | 921396                   | 38069305                              | 96.842   |
| total |                | 993083                   | 39310916                              | 100.000  |

HPLC chromatogram of compound **8** (98% ee)

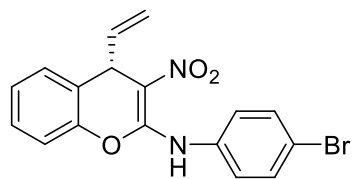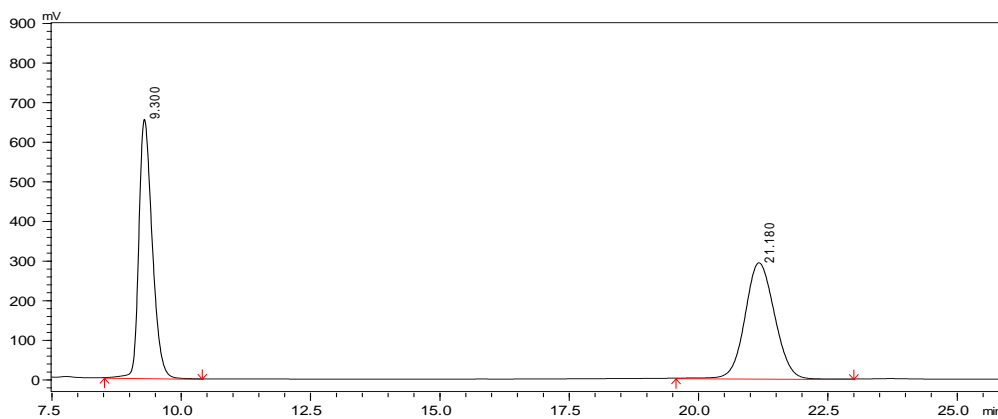

| #     | Ret Time (min) | Height (μV) | Area (μV.sec) | Area (%) |
|-------|----------------|-------------|---------------|----------|
| 1     | 9.300          | 653567      | 11699755      | 50.359   |
| 2     | 21.180         | 292355      | 11532887      | 49.641   |
| total |                | 945923      | 23232641      | 100.000  |

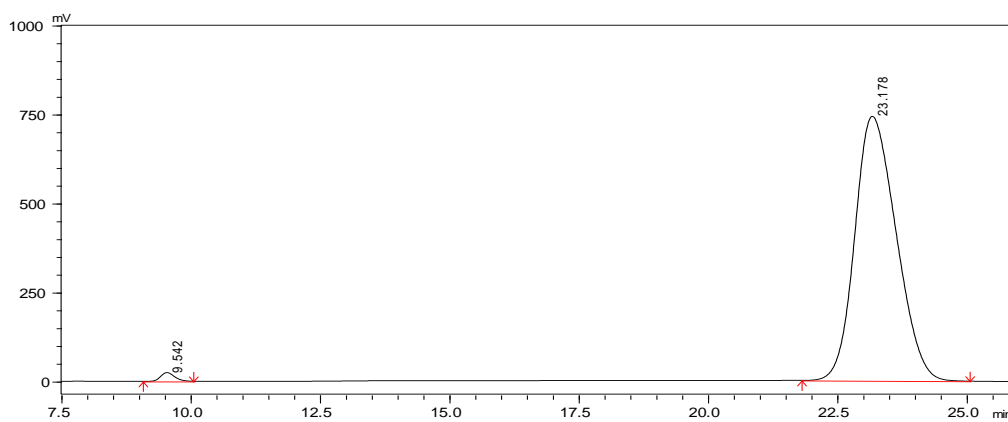

| #     | Ret Time (min) | Height (μV) | Area (μV.sec) | Area (%) |
|-------|----------------|-------------|---------------|----------|
| 1     | 9.542          | 24475       | 455031        | 1.090    |
| 2     | 23.178         | 742487      | 41296646      | 98.910   |
| total |                | 766962      | 41751677      | 100.000  |

HPLC chromatogram of compound **9** (85% ee)

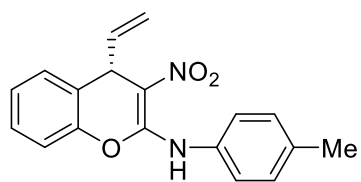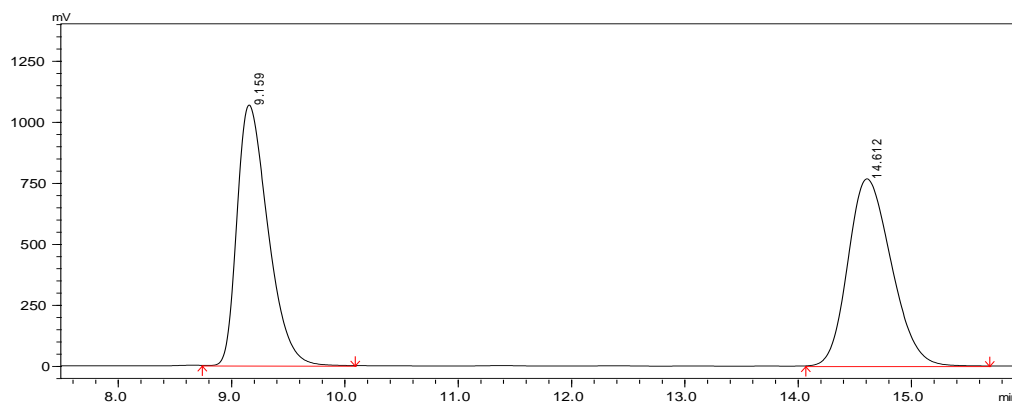

| #     | Ret Time (min) | Height (μV) | Area (μV.sec) | Area (%) |
|-------|----------------|-------------|---------------|----------|
| 1     | 9.159          | 1066560     | 20238223      | 49.900   |
| 2     | 14.612         | 765863      | 20319219      | 50.100   |
| total |                | 1832423     | 40557442      | 100.000  |

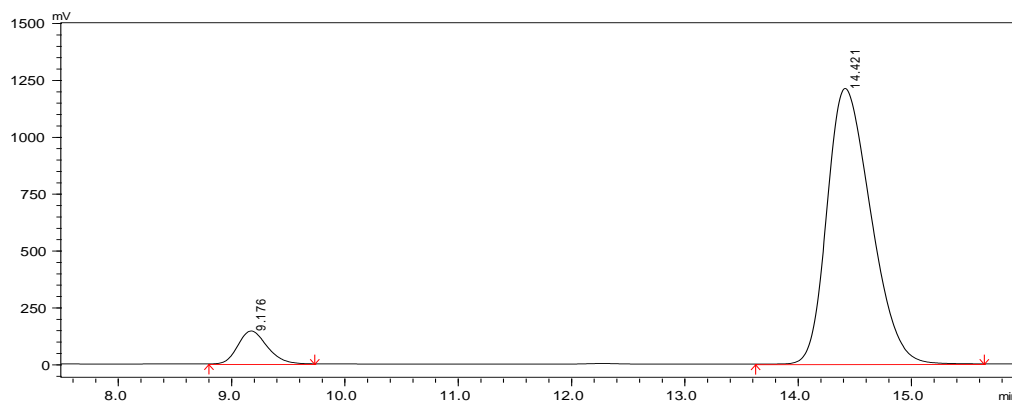

| #     | Ret Time (min) | Height (μV) | Area (μV.sec) | Area (%) |
|-------|----------------|-------------|---------------|----------|
| 1     | 9.176          | 144348      | 2588824       | 7.390    |
| 2     | 14.421         | 1210705     | 32440281      | 92.610   |
| total |                | 1355053     | 35029106      | 100.000  |

HPLC chromatogram of compound **10** (93% ee)

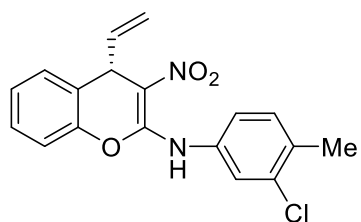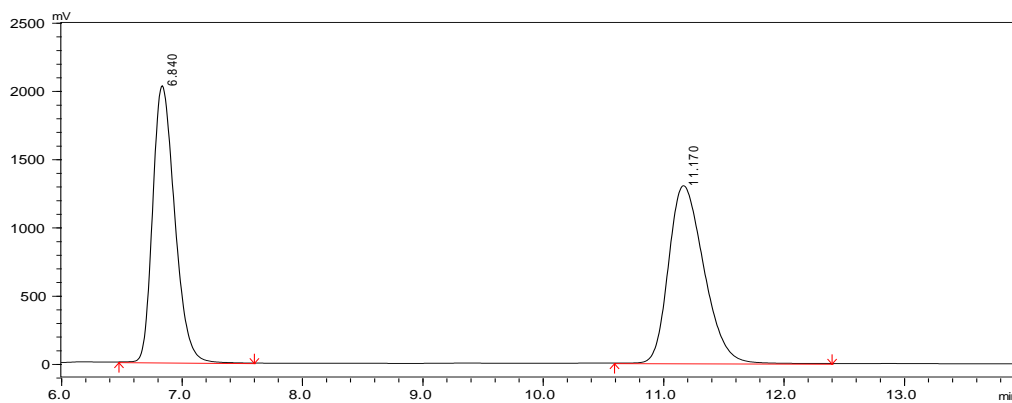

| #     | Ret Time (min) | Height (μV) | Area (μV.sec) | Area (%) |
|-------|----------------|-------------|---------------|----------|
| 1     | 6.840          | 2026953     | 25743629      | 49.404   |
| 2     | 11.170         | 1300633     | 26365044      | 50.596   |
| total |                | 3327586     | 52108673      | 100.000  |

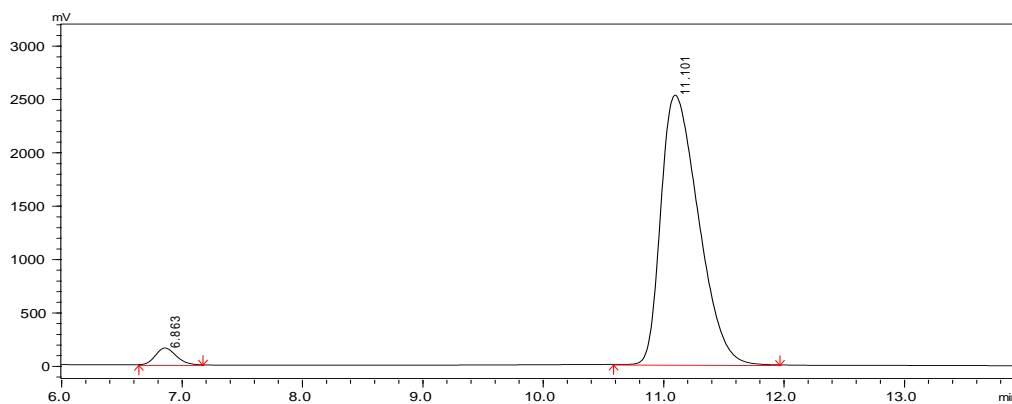

| #     | Ret Time (min) | Height (μV) | Area (μV.sec) | Area (%) |
|-------|----------------|-------------|---------------|----------|
| 1     | 6.863          | 156845      | 1859463       | 3.285    |
| 2     | 11.101         | 2525037     | 54746618      | 96.715   |
| total |                | 2681882     | 56606081      | 100.000  |

HPLC chromatogram of compound **11** (50% ee)

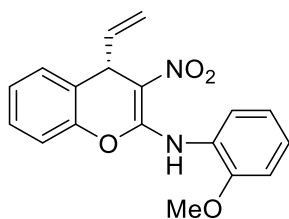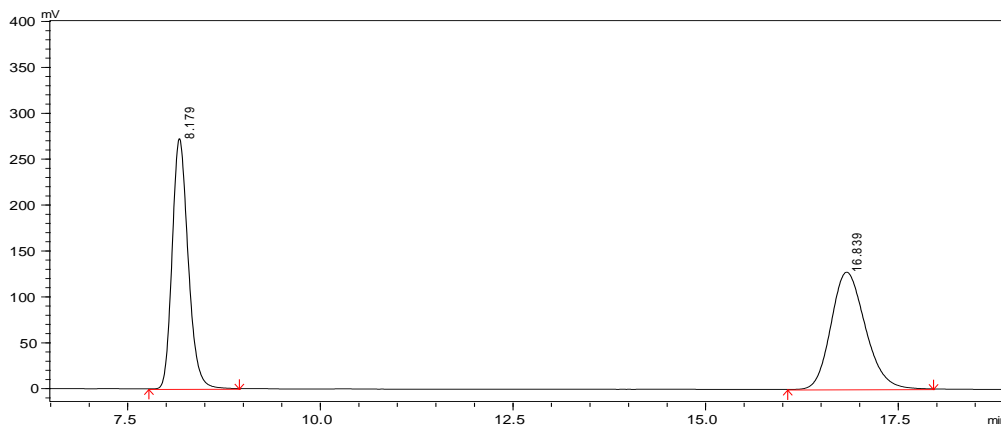

| #     | Ret Time (min) | Height (μV) | Area (μV.sec) | Area (%) |
|-------|----------------|-------------|---------------|----------|
| 1     | 8.179          | 272333      | 3922060       | 49.897   |
| 2     | 16.839         | 127442      | 3938198       | 50.103   |
| total |                | 399775      | 7860258       | 100.000  |

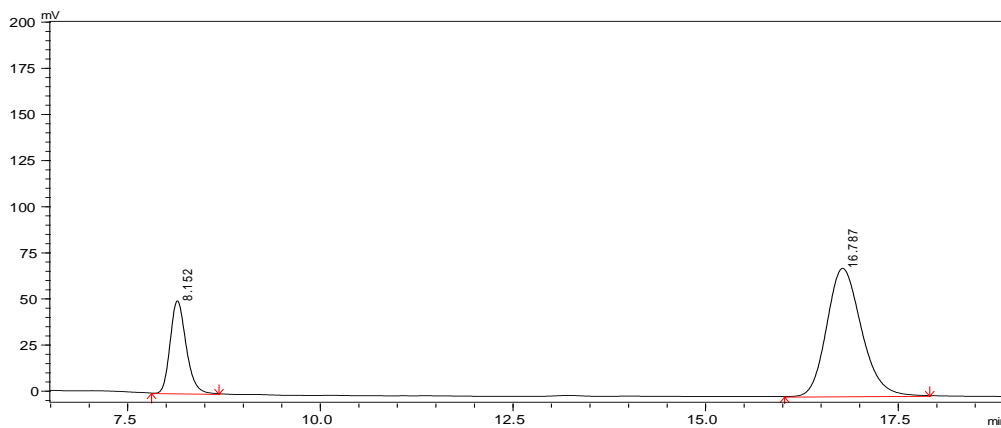

| #     | Ret Time (min) | Height (μV) | Area (μV.sec) | Area (%) |
|-------|----------------|-------------|---------------|----------|
| 1     | 8.152          | 50105       | 717116        | 24.926   |
| 2     | 16.787         | 69254       | 2159852       | 75.074   |
| total |                | 119359      | 2876968       | 100.000  |

HPLC chromatogram of compound **12** (92% ee)

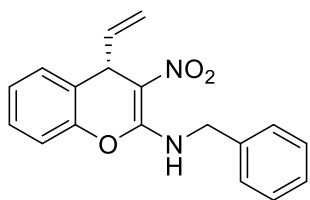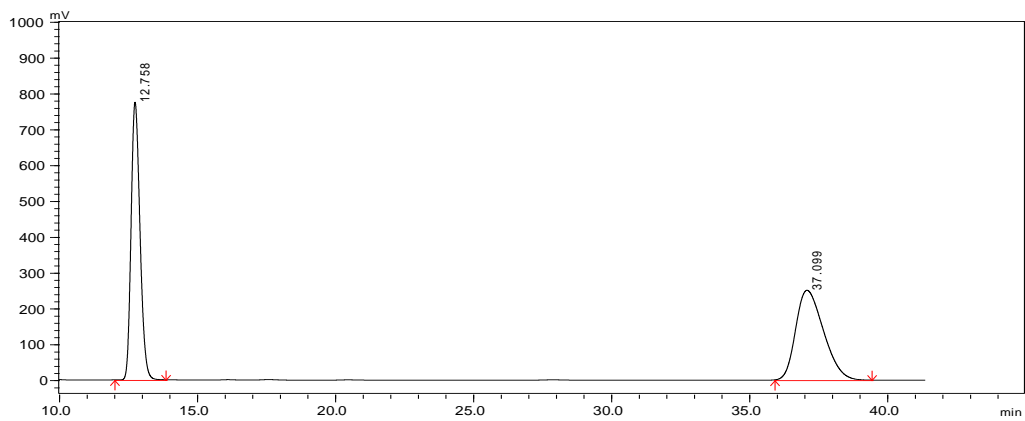

| #     | Ret Time (min) | Height ( $\mu$ V) | Area ( $\mu$ V.sec) | Area (%) |
|-------|----------------|-------------------|---------------------|----------|
| 1     | 12.758         | 17374541          | 774483              | 49.812   |
| 2     | 37.099         | 17505443          | 250372              | 50.188   |
| total |                | 34879984          | 1024855             | 100.000  |

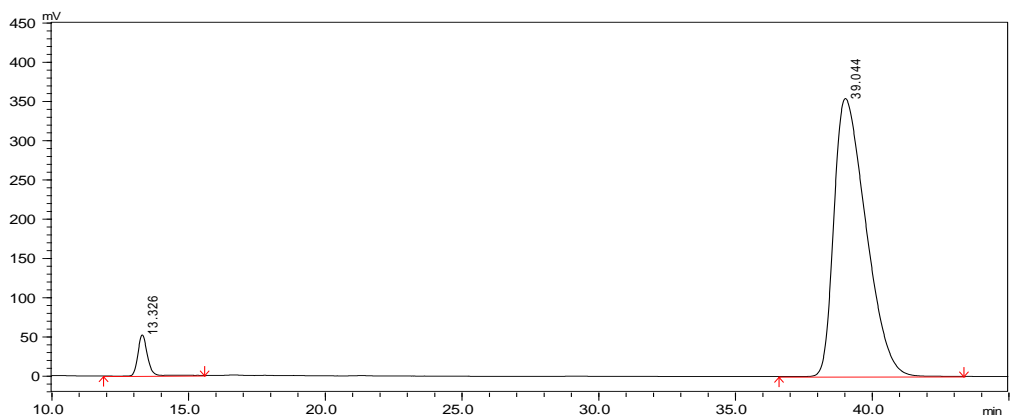

| #     | Ret Time (min) | Height ( $\mu$ V) | Area ( $\mu$ V.sec) | Area (%) |
|-------|----------------|-------------------|---------------------|----------|
| 1     | 13.326         | 1234587           | 51985               | 4.120    |
| 2     | 39.044         | 28730828          | 354169              | 95.880   |
| total |                | 29965415          | 406153              | 100.000  |

HPLC chromatogram of compound **13** (96% ee)

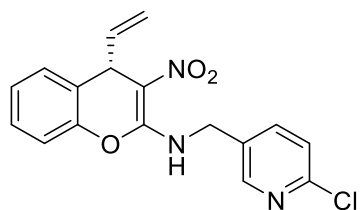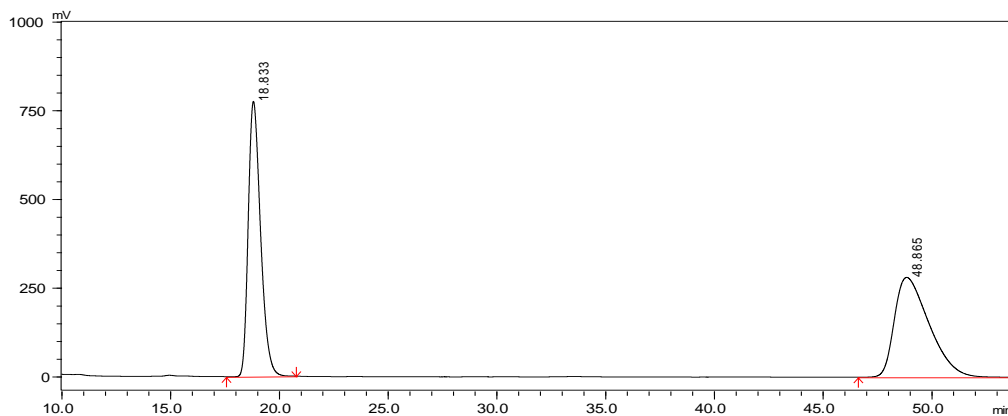

| #     | Ret Time (min) | Height (μV) | Area (μV.sec) | Area (%) |
|-------|----------------|-------------|---------------|----------|
| 1     | 18.833         | 30506618    | 775136        | 49.544   |
| 2     | 48.865         | 31068088    | 281096        | 50.456   |
| total |                | 61574706    | 1056232       | 100.000  |

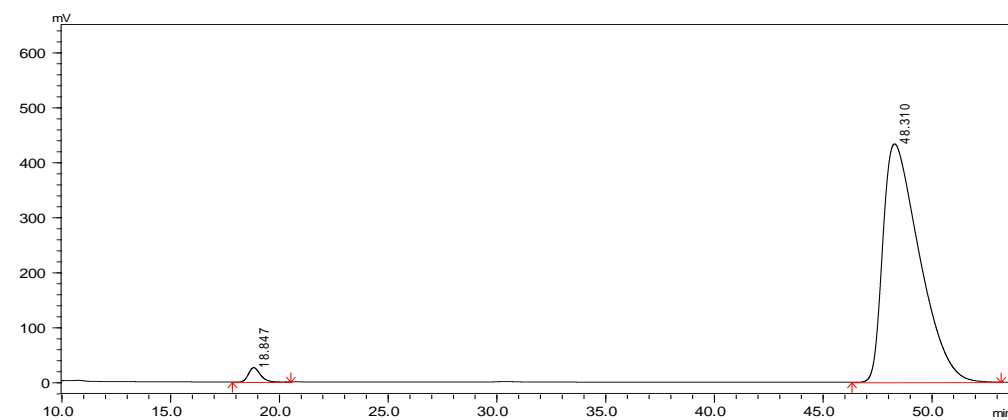

| #     | Ret Time (min) | Height (μV) | Area (μV.sec) | Area (%) |
|-------|----------------|-------------|---------------|----------|
| 1     | 18.847         | 978150      | 26082         | 1.900    |
| 2     | 48.310         | 50516790    | 433424        | 98.100   |
| total |                | 51494941    | 459505        | 100.000  |

HPLC chromatogram of compound **14** (91% ee)

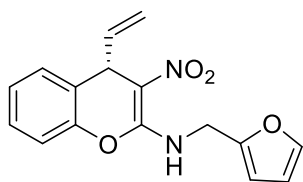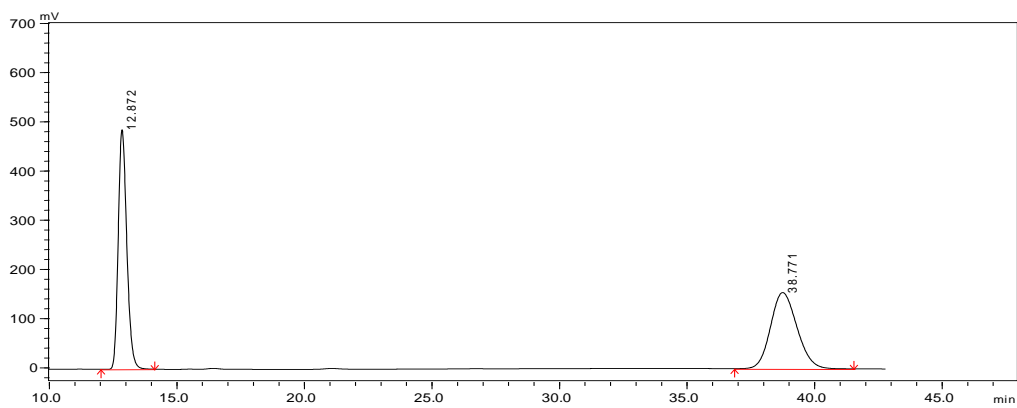

| #     | Ret Time (min) | Height ( $\mu$ V) | Area ( $\mu$ V.sec) | Area (%) |
|-------|----------------|-------------------|---------------------|----------|
| 1     | 12.872         | 486622            | 11381800            | 50.569   |
| 2     | 38.771         | 154687            | 11125501            | 49.431   |
| total |                | 641308            | 22507301            | 100.000  |

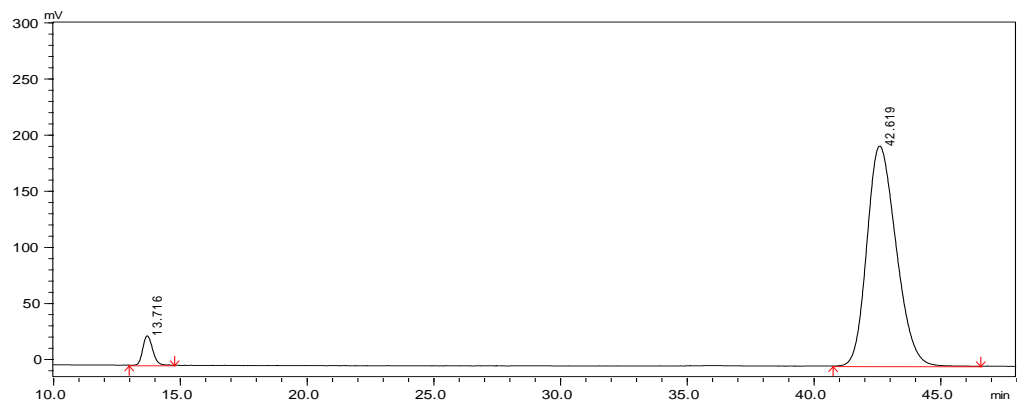

| #     | Ret Time (min) | Height ( $\mu$ V) | Area ( $\mu$ V.sec) | Area (%) |
|-------|----------------|-------------------|---------------------|----------|
| 1     | 13.716         | 26135             | 705581              | 4.306    |
| 2     | 42.619         | 196002            | 15680422            | 95.694   |
| total |                | 222137            | 16386004            | 100.000  |



HPLC chromatogram of compound **15** (82% ee)

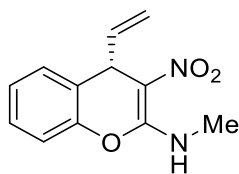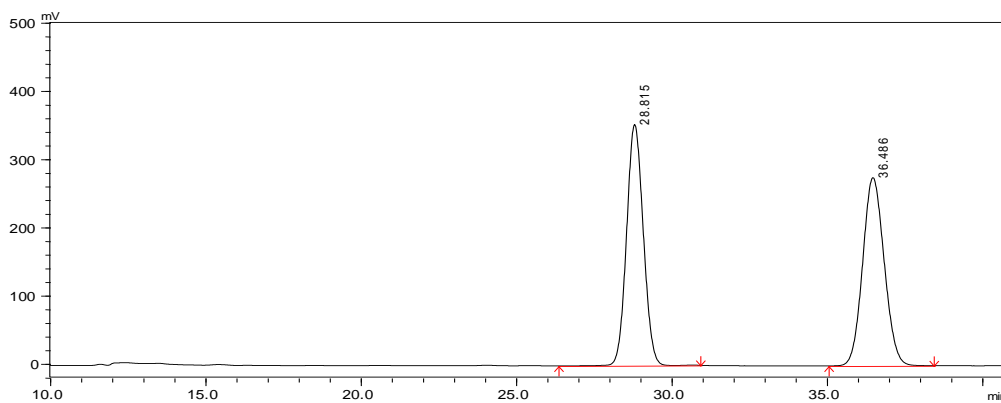

| #     | Ret Time (min) | Height (μV) | Area (μV.sec) | Area (%) |
|-------|----------------|-------------|---------------|----------|
| 1     | 28.815         | 353114      | 13195412      | 49.840   |
| 2     | 36.486         | 275653      | 13280166      | 50.160   |
| total |                | 628767      | 26475578      | 100.000  |

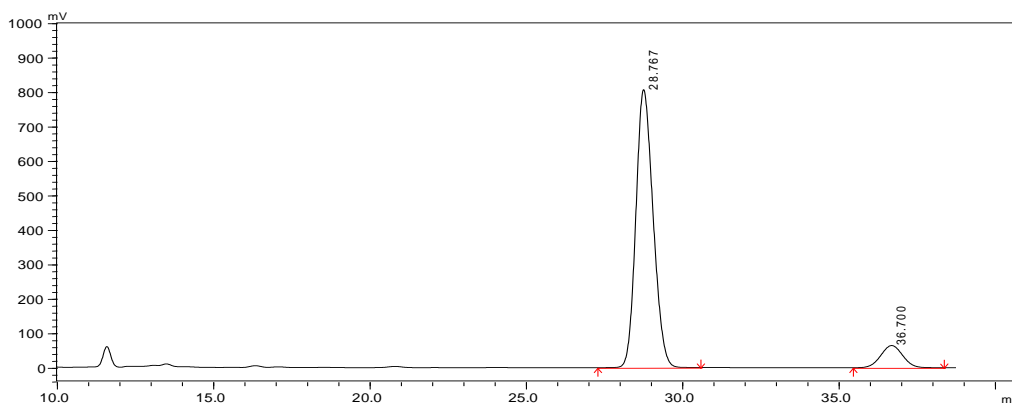

| #     | Ret Time (min) | Height (μV) | Area (μV.sec) | Area (%) |
|-------|----------------|-------------|---------------|----------|
| 1     | 28.767         | 806115      | 30868500      | 90.786   |
| 2     | 36.700         | 64311       | 3132844       | 9.214    |
| total |                | 870426      | 34001345      | 100.000  |

HPLC chromatogram of compound **16** (65% ee)

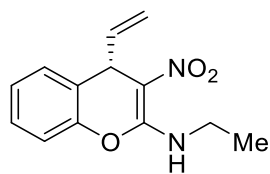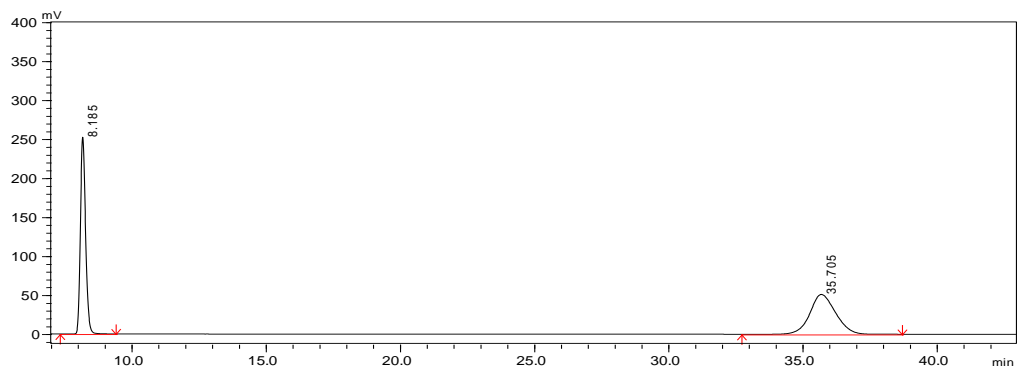

| #     | Ret Time (min) | Height (μV) | Area (μV.sec) | Area (%) |
|-------|----------------|-------------|---------------|----------|
| 1     | 8.185          | 252169      | 3390068       | 49.897   |
| 2     | 35.705         | 51005       | 3404018       | 50.103   |
| total |                | 303173      | 6794086       | 100.000  |

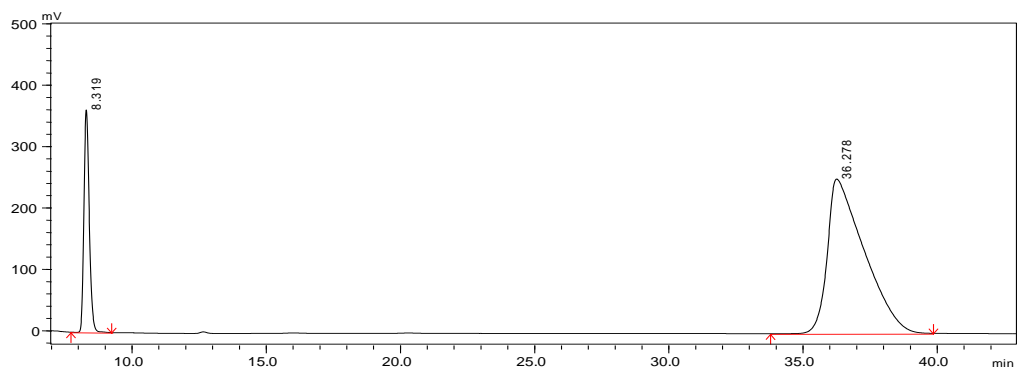

| #     | Ret Time (min) | Height (μV) | Area (μV.sec) | Area (%) |
|-------|----------------|-------------|---------------|----------|
| 1     | 8.319          | 362578      | 5016750       | 17.282   |
| 2     | 36.278         | 251727      | 24012842      | 82.718   |
| total |                | 614305      | 29029592      | 100.000  |

HPLC chromatogram of compound **17** (69% ee)

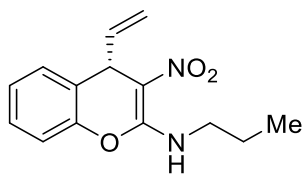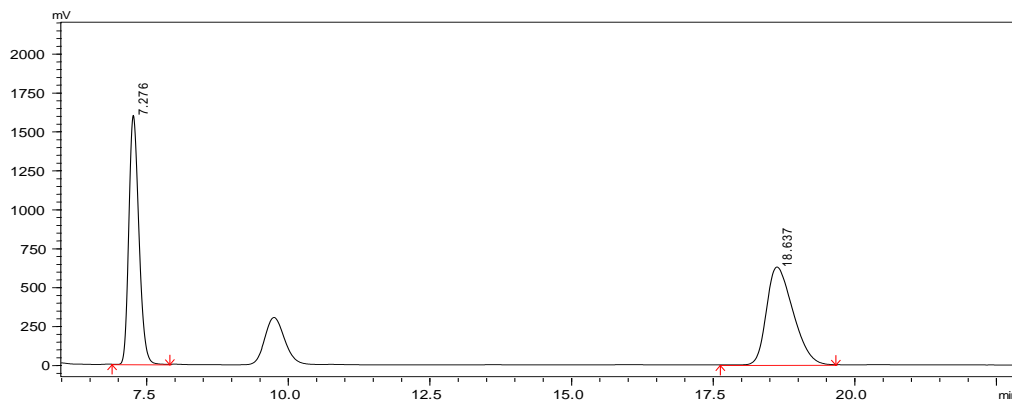

| #     | Ret Time (min) | Height (μV) | Area (μV.sec) | Area (%) |
|-------|----------------|-------------|---------------|----------|
| 1     | 7.276          | 1598393     | 19603537      | 49.103   |
| 2     | 18.637         | 627745      | 20319377      | 50.897   |
| total |                | 2226138     | 39922914      | 100.000  |

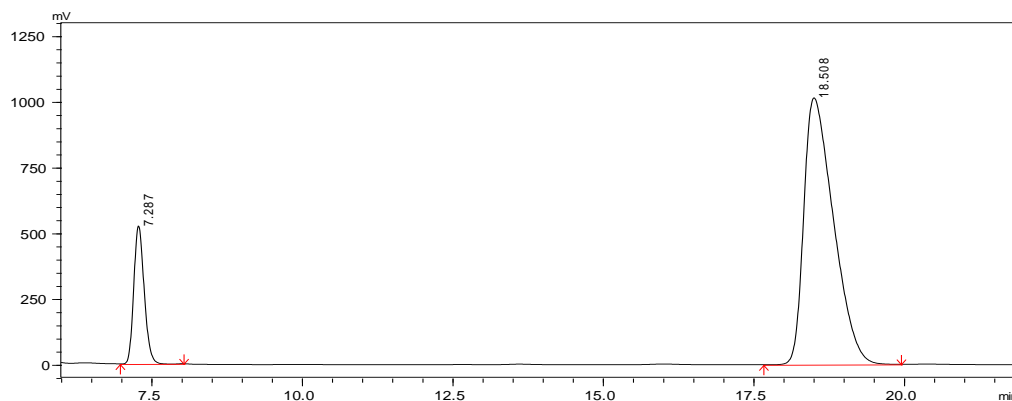

| #     | Ret Time (min) | Height (μV) | Area (μV.sec) | Area (%) |
|-------|----------------|-------------|---------------|----------|
| 1     | 7.287          | 523900      | 6293852       | 15.330   |
| 2     | 18.508         | 1014498     | 34761559      | 84.670   |
| total |                | 1538399     | 41055411      | 100.000  |

HPLC chromatogram of compound **18** (75% ee)

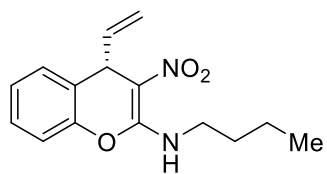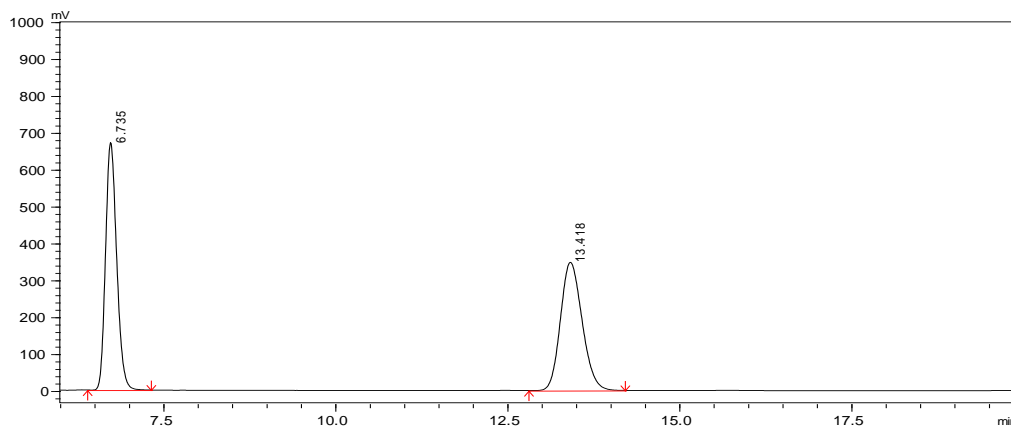

| #     | Ret Time (min) | Height (μV) | Area (μV.sec) | Area (%) |
|-------|----------------|-------------|---------------|----------|
| 1     | 6.735          | 670868      | 7549701       | 49.817   |
| 2     | 13.418         | 347626      | 7605054       | 50.183   |
| total |                | 1018494     | 15154756      | 100.000  |

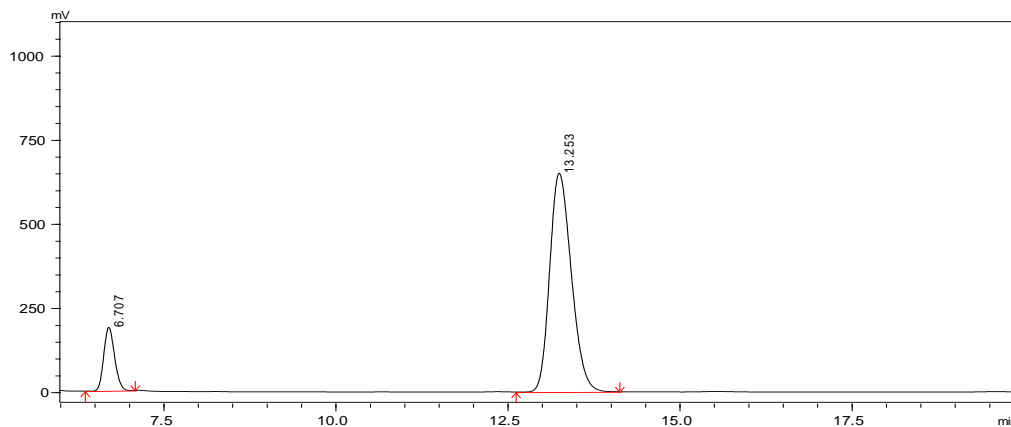

| #     | Ret Time (min) | Height (μV) | Area (μV.sec) | Area (%) |
|-------|----------------|-------------|---------------|----------|
| 1     | 6.707          | 188250      | 2040167       | 12.557   |
| 2     | 13.253         | 649839      | 14206549      | 87.443   |
| total |                | 838090      | 16246716      | 100.000  |

HPLC chromatogram of compound **19** (72% ee)

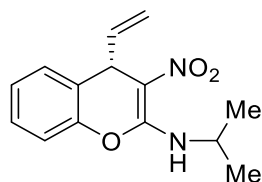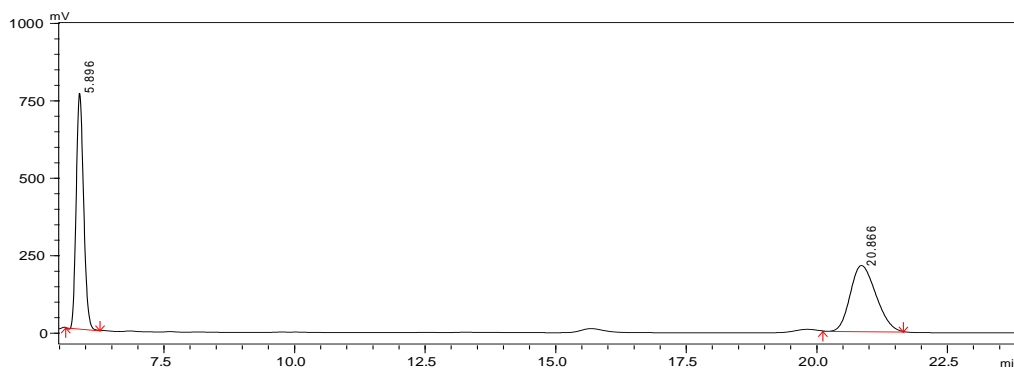

| #     | Ret Time (min) | Height (μV) | Area (μV.sec) | Area (%) |
|-------|----------------|-------------|---------------|----------|
| 1     | 5.896          | 759152      | 7448156       | 50.884   |
| 2     | 20.866         | 211881      | 7189402       | 49.116   |
| total |                | 971033      | 14637558      | 100.000  |

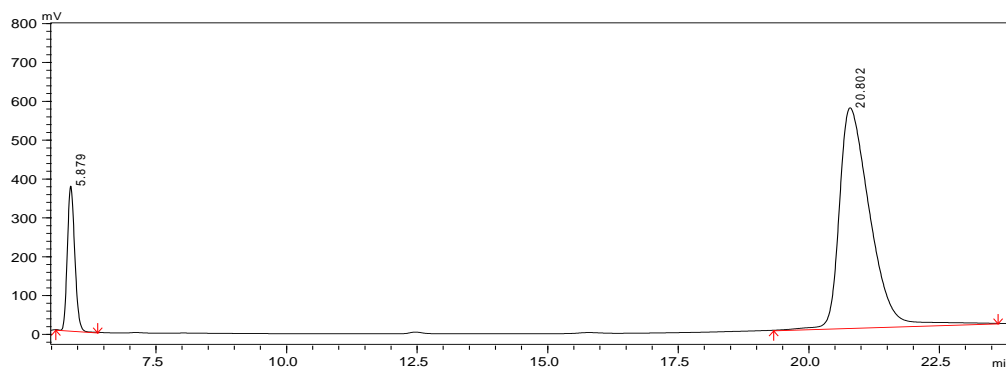

| #     | Ret Time (min) | Height (μV) | Area (μV.sec) | Area (%) |
|-------|----------------|-------------|---------------|----------|
| 1     | 5.879          | 371654      | 3641534       | 13.706   |
| 2     | 20.802         | 566416      | 22927632      | 86.294   |
| total |                | 938070      | 26569165      | 100.000  |

HPLC chromatogram of compound **20** (83% ee)

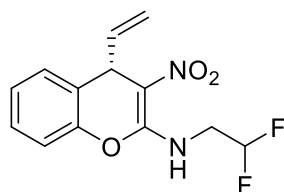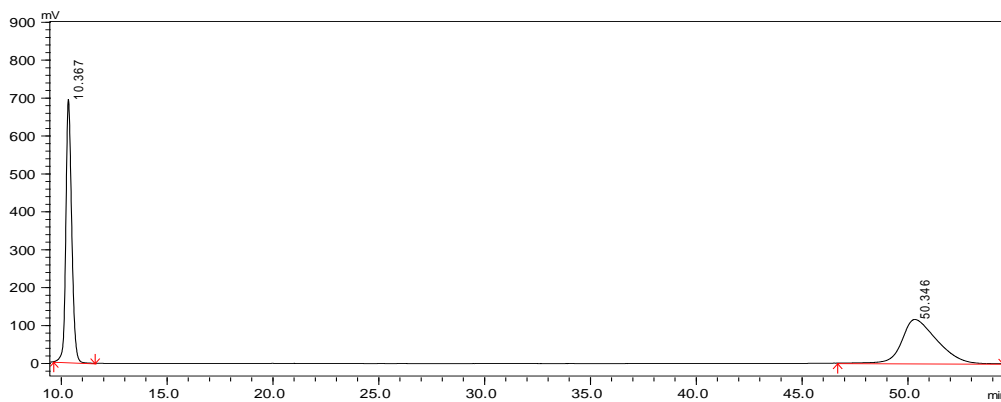

| #     | Ret Time (min) | Height (μV) | Area (μV.sec) | Area (%) |
|-------|----------------|-------------|---------------|----------|
| 1     | 10.367         | 693217      | 13330797      | 50.329   |
| 2     | 50.346         | 115845      | 13156597      | 49.671   |
| total |                | 809061      | 26487394      | 100.000  |

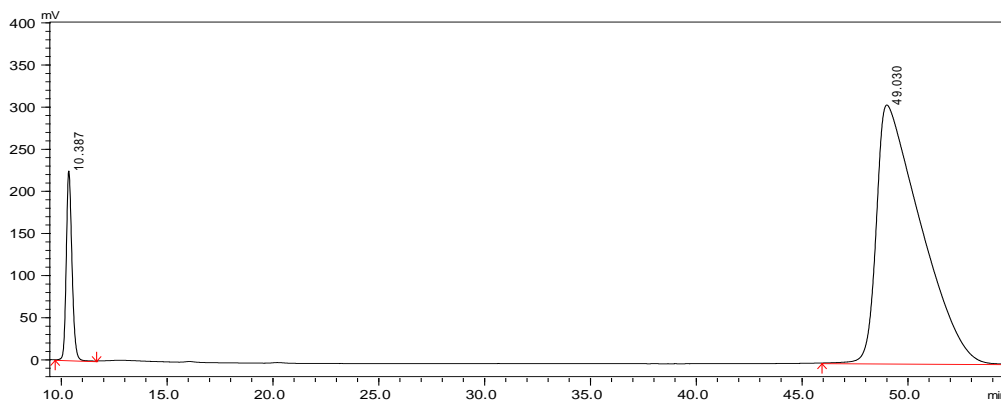

| #     | Ret Time (min) | Height (μV) | Area (μV.sec) | Area (%) |
|-------|----------------|-------------|---------------|----------|
| 1     | 10.387         | 224508      | 4188166       | 8.601    |
| 2     | 49.030         | 306647      | 44506410      | 91.399   |
| total |                | 531155      | 48694575      | 100.000  |

HPLC chromatogram of compound **21** (77% ee)

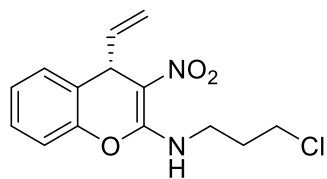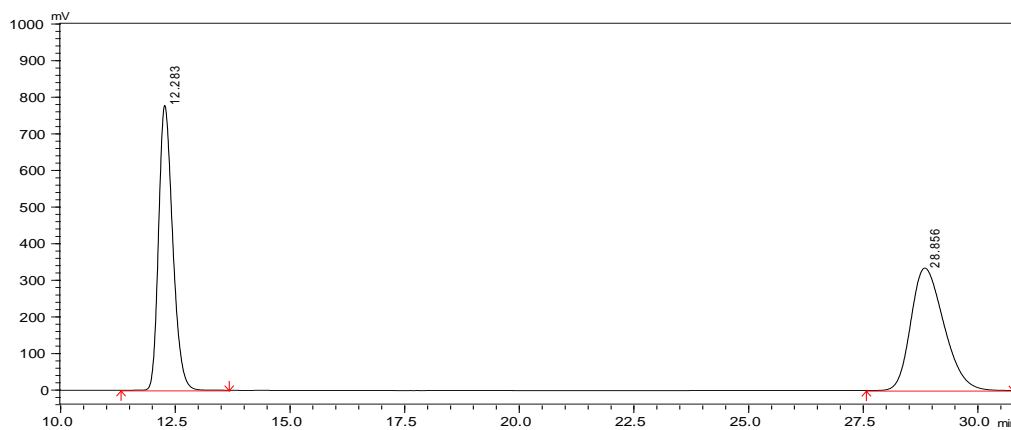

| #     | Ret Time (min) | Height (μV) | Area (μV.sec) | Area (%) |
|-------|----------------|-------------|---------------|----------|
| 1     | 12.283         | 778052      | 16623158      | 49.817   |
| 2     | 28.856         | 334311      | 16745013      | 50.183   |
| total |                | 1112363     | 33368171      | 100.000  |

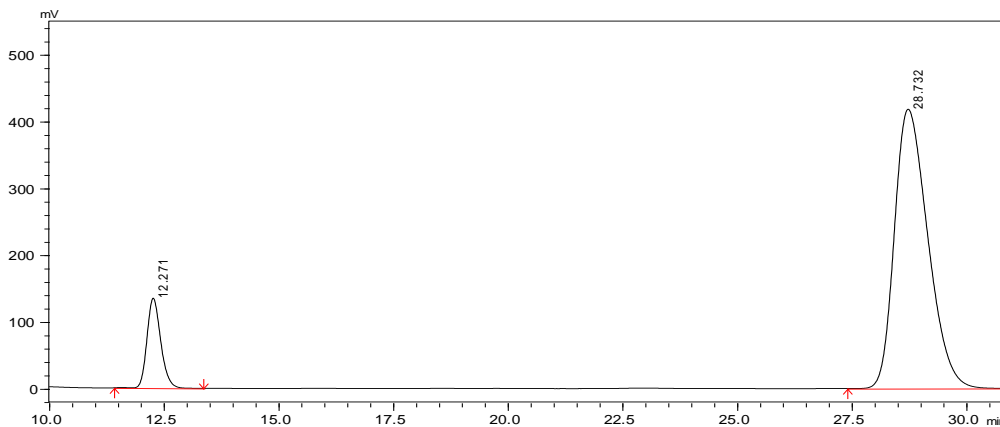

| #     | Ret Time (min) | Height (μV) | Area (μV.sec) | Area (%) |
|-------|----------------|-------------|---------------|----------|
| 1     | 12.271         | 134425      | 2797913       | 11.670   |
| 2     | 28.732         | 418187      | 21176382      | 88.330   |
| total |                | 552612      | 23974295      | 100.000  |

HPLC chromatogram of compound **22** (60% ee)

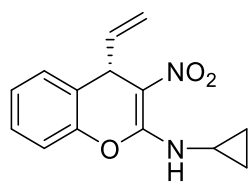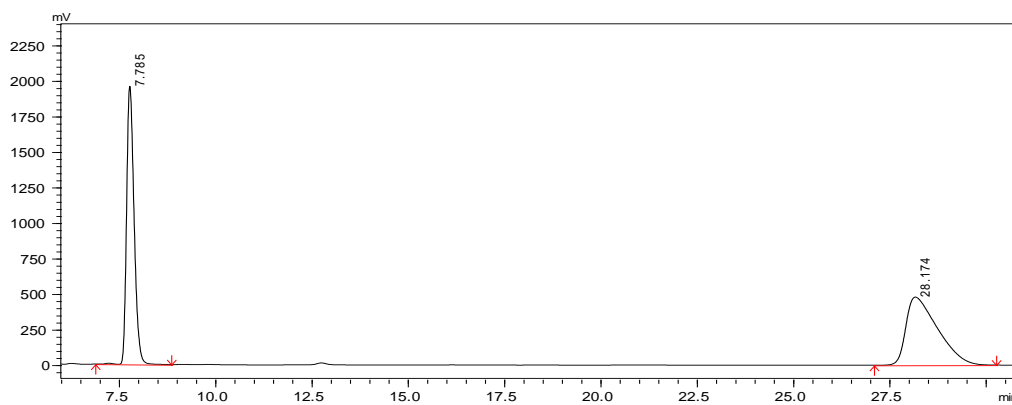

| #     | Ret Time (min) | Height ( $\mu\text{V}$ ) | Area ( $\mu\text{V}\cdot\text{sec}$ ) | Area (%) |
|-------|----------------|--------------------------|---------------------------------------|----------|
| 1     | 7.785          | 1956541                  | 26411047                              | 49.232   |
| 2     | 28.174         | 479196                   | 27235521                              | 50.768   |
| total |                | 2435738                  | 53646567                              | 100.000  |

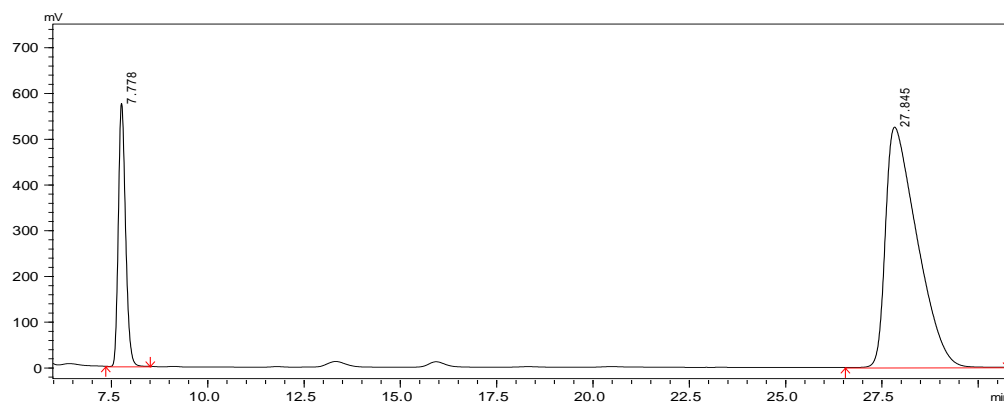

| #     | Ret Time (min) | Height ( $\mu\text{V}$ ) | Area ( $\mu\text{V}\cdot\text{sec}$ ) | Area (%) |
|-------|----------------|--------------------------|---------------------------------------|----------|
| 1     | 7.778          | 574364                   | 7483138                               | 20.064   |
| 2     | 27.845         | 525118                   | 29812745                              | 79.936   |
| total |                | 1099482                  | 37295883                              | 100.000  |



HPLC chromatogram of compound **23** (70% ee)

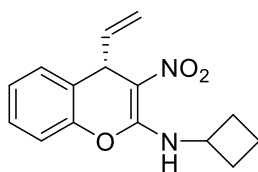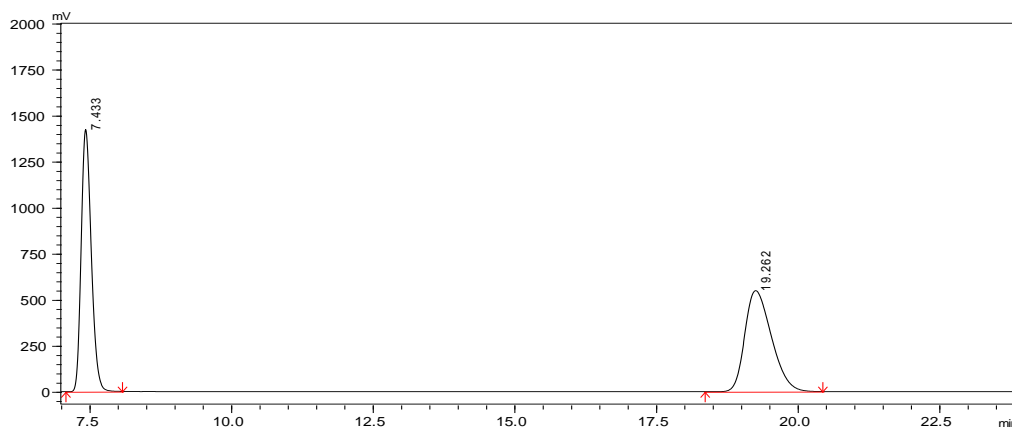

| #     | Ret Time (min) | Height (μV) | Area (μV.sec) | Area (%) |
|-------|----------------|-------------|---------------|----------|
| 1     | 7.433          | 1423299     | 17597122      | 49.548   |
| 2     | 19.262         | 548545      | 17918438      | 50.452   |
| total |                | 1971844     | 35515560      | 100.000  |

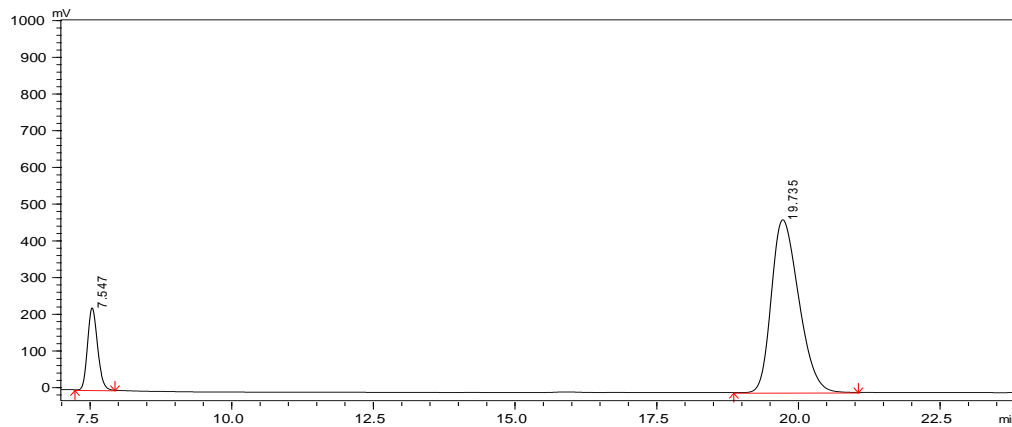

| #     | Ret Time (min) | Height (μV) | Area (μV.sec) | Area (%) |
|-------|----------------|-------------|---------------|----------|
| 1     | 7.547          | 223415      | 2744417       | 14.811   |
| 2     | 19.735         | 470871      | 15784654      | 85.189   |
| total |                | 694286      | 18529071      | 100.000  |

HPLC chromatogram of compound **24** (69% ee)

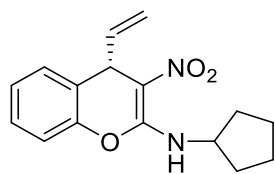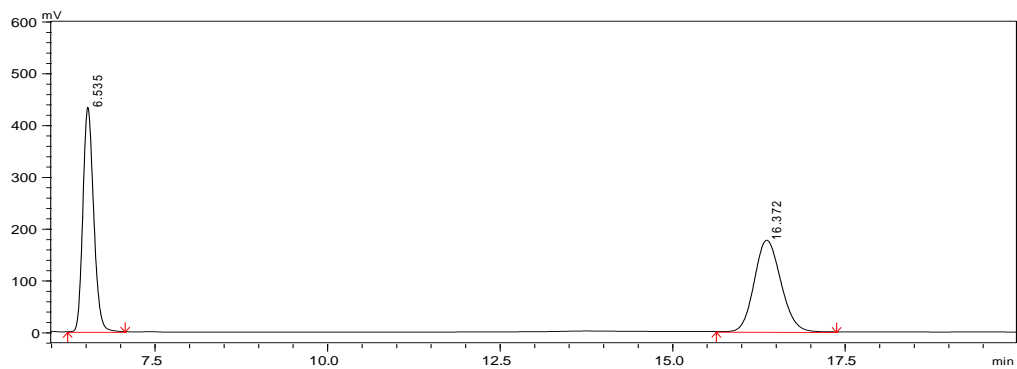

| #     | Ret Time (min) | Height ( $\mu$ V) | Area ( $\mu$ V.sec) | Area (%) |
|-------|----------------|-------------------|---------------------|----------|
| 1     | 6.535          | 433603            | 4703663             | 49.942   |
| 2     | 16.372         | 176600            | 4714681             | 50.058   |
| total |                | 610203            | 9418344             | 100.000  |

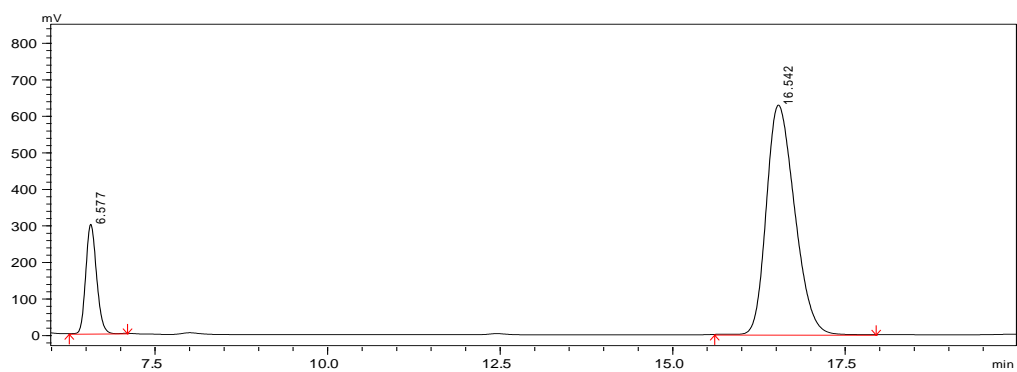

| #     | Ret Time (min) | Height ( $\mu$ V) | Area ( $\mu$ V.sec) | Area (%) |
|-------|----------------|-------------------|---------------------|----------|
| 1     | 6.577          | 299162            | 3229740             | 15.306   |
| 2     | 16.542         | 628058            | 17871697            | 84.694   |
| total |                | 927220            | 21101436            | 100.000  |

HPLC chromatogram of compound **25** (87% ee)

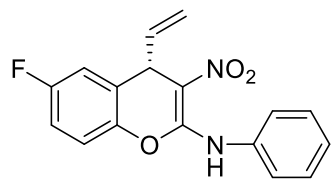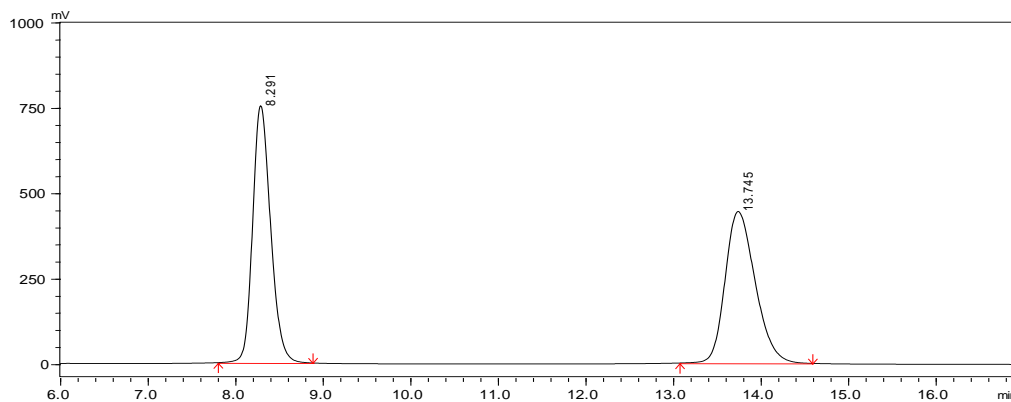

| #     | Ret Time (min) | Height (μV) | Area (μV.sec) | Area (%) |
|-------|----------------|-------------|---------------|----------|
| 1     | 8.291          | 752515      | 10748595      | 50.340   |
| 2     | 13.745         | 444090      | 10603295      | 49.660   |
| total |                | 1196604     | 21351890      | 100.000  |

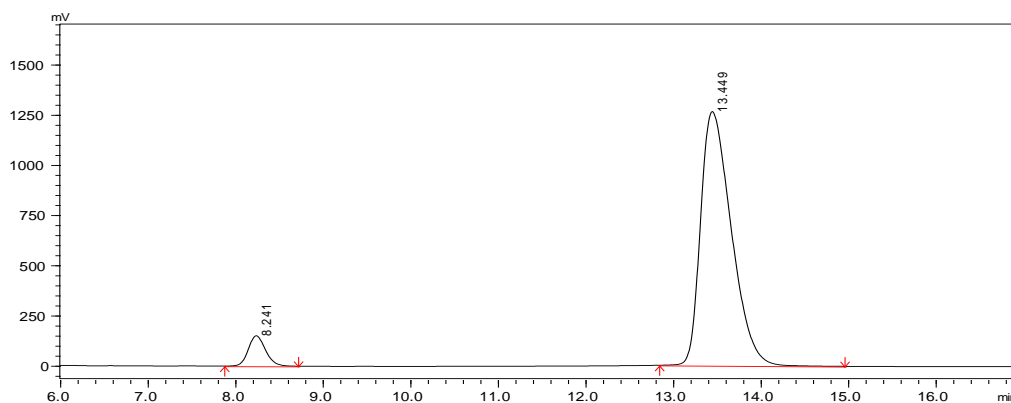

| #     | Ret Time (min) | Height (μV) | Area (μV.sec) | Area (%) |
|-------|----------------|-------------|---------------|----------|
| 1     | 8.241          | 151220      | 2065435       | 6.282    |
| 2     | 13.449         | 1264868     | 30810990      | 93.718   |
| total |                | 1416088     | 32876425      | 100.000  |

HPLC chromatogram of compound **26** (88% ee)

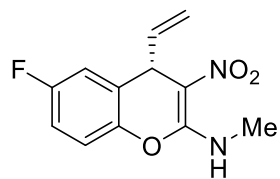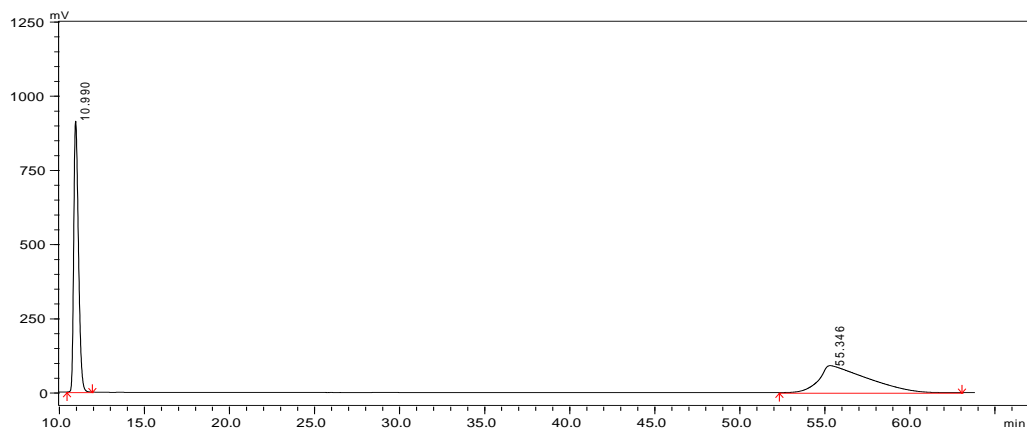

| #     | Ret Time (min) | Height (μV) | Area (μV.sec) | Area (%) |
|-------|----------------|-------------|---------------|----------|
| 1     | 10.990         | 912175      | 17592891      | 49.751   |
| 2     | 55.346         | 90733       | 17769066      | 50.249   |
| total |                | 1002908     | 35361956      | 100.000  |

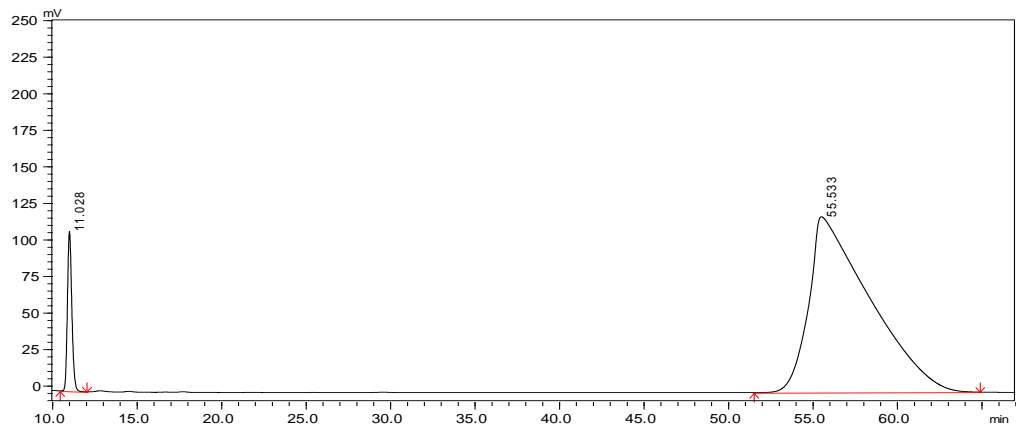

| #     | Ret Time (min) | Height (μV) | Area (μV.sec) | Area (%) |
|-------|----------------|-------------|---------------|----------|
| 1     | 11.028         | 109262      | 1986498       | 6.163    |
| 2     | 55.533         | 120183      | 30244984      | 93.837   |
| total |                | 229445      | 32231482      | 100.000  |

HPLC chromatogram of compound **27** (79% ee)

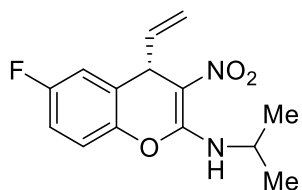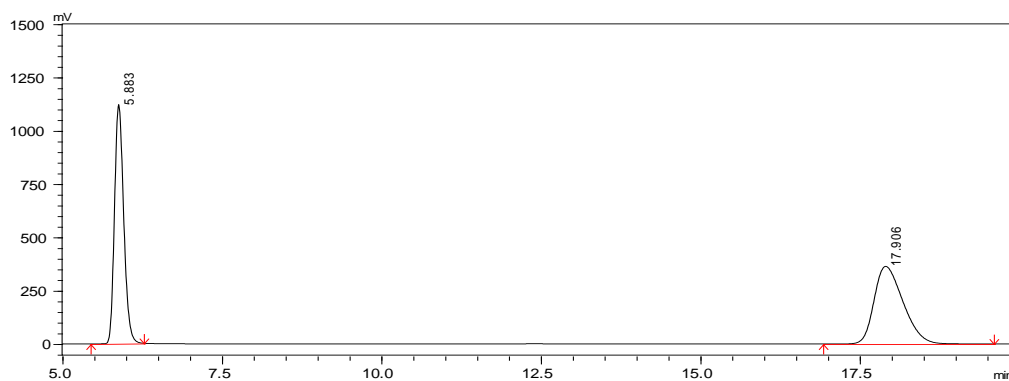

| #     | Ret Time (min) | Height (μV) | Area (μV.sec) | Area (%) |
|-------|----------------|-------------|---------------|----------|
| 1     | 5.883          | 1120377     | 11255867      | 49.579   |
| 2     | 17.906         | 363606      | 11447038      | 50.421   |
| total |                | 1483983     | 22702905      | 100.000  |

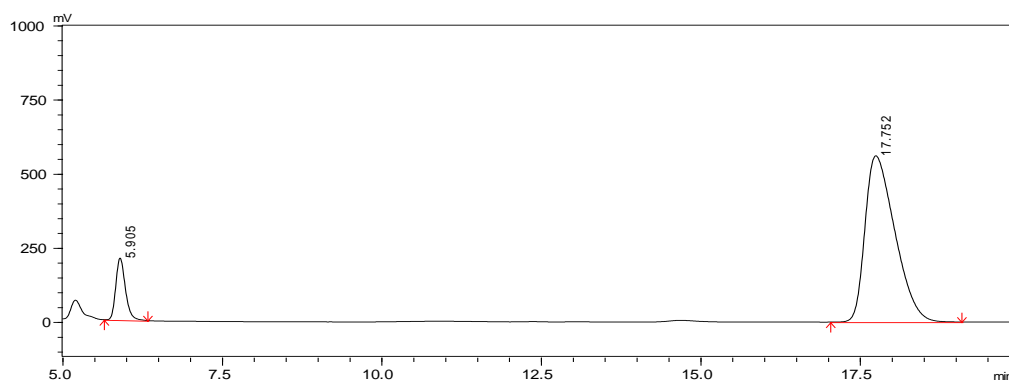

| #     | Ret Time (min) | Height (μV) | Area (μV.sec) | Area (%) |
|-------|----------------|-------------|---------------|----------|
| 1     | 5.905          | 208647      | 2183942       | 10.690   |
| 2     | 17.752         | 560621      | 18245914      | 89.310   |
| total |                | 769268      | 20429856      | 100.000  |

HPLC chromatogram of compound **28** (96% ee)

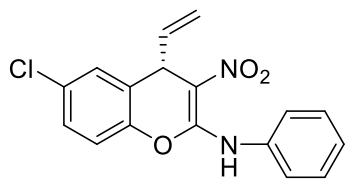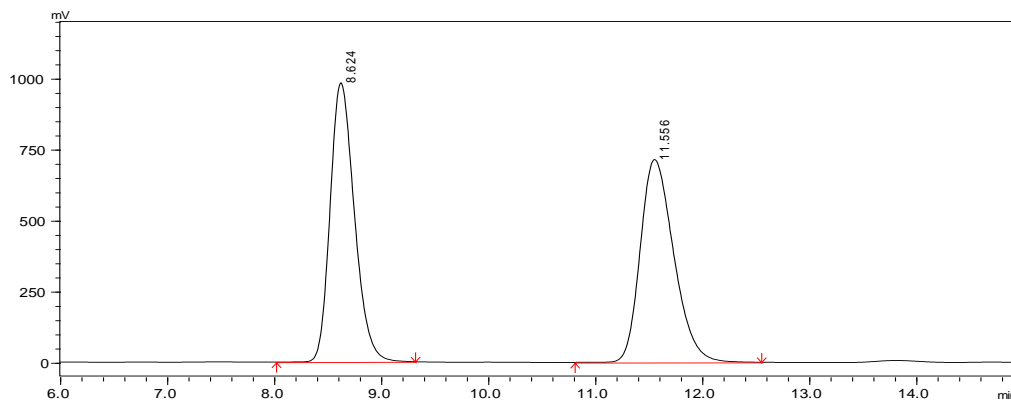

| #     | Ret Time (min) | Height (μV) | Area (μV.sec) | Area (%) |
|-------|----------------|-------------|---------------|----------|
| 1     | 8.624          | 982347      | 15480405      | 49.940   |
| 2     | 11.556         | 713612      | 15517604      | 50.060   |
| total |                | 1695959     | 30998009      | 100.000  |

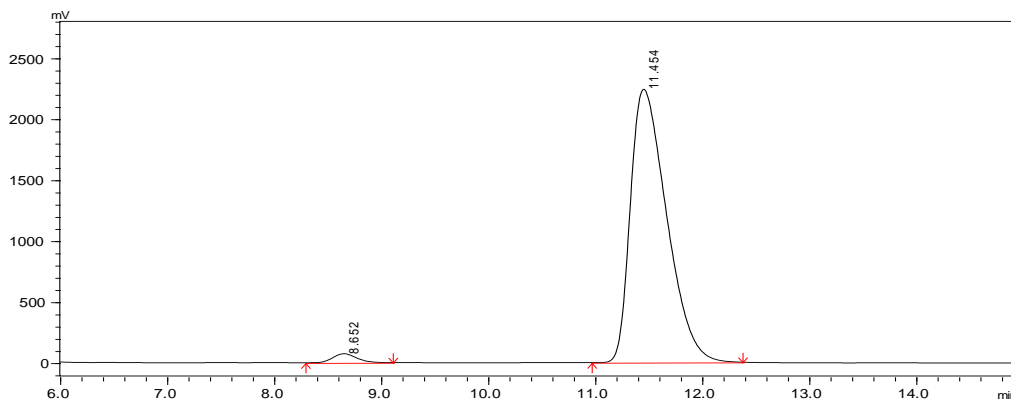

| #     | Ret Time (min) | Height (μV) | Area (μV.sec) | Area (%) |
|-------|----------------|-------------|---------------|----------|
| 1     | 8.652          | 73442       | 1132526       | 2.103    |
| 2     | 11.454         | 2239642     | 52714023      | 97.897   |
| total |                | 2313085     | 53846549      | 100.000  |

HPLC chromatogram of compound **29** (86% ee)

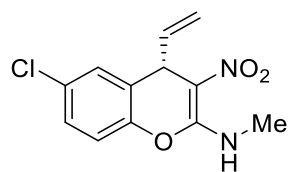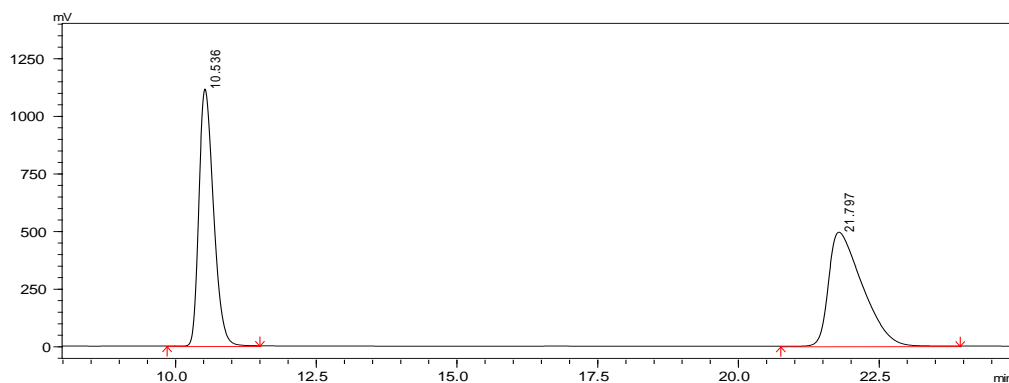

| #     | Ret Time (min) | Height (μV) | Area (μV.sec) | Area (%) |
|-------|----------------|-------------|---------------|----------|
| 1     | 10.536         | 1114441     | 20124548      | 49.491   |
| 2     | 21.797         | 494586      | 20538577      | 50.509   |
| total |                | 1609027     | 40663124      | 100.000  |

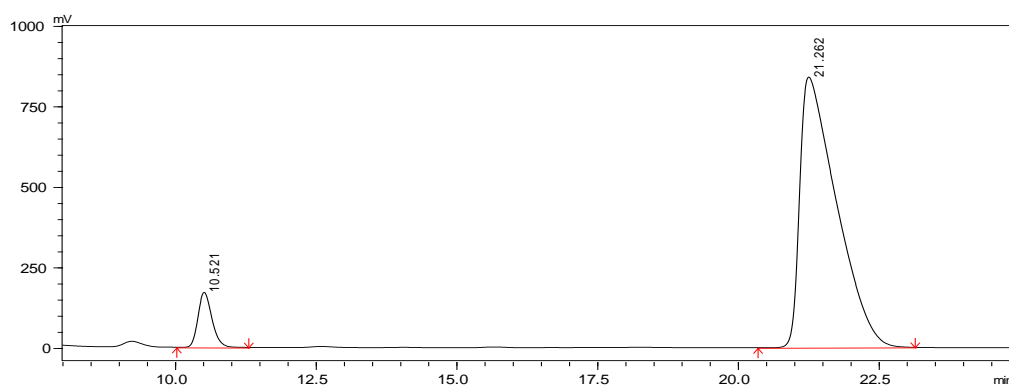

| #     | Ret Time (min) | Height (μV) | Area (μV.sec) | Area (%) |
|-------|----------------|-------------|---------------|----------|
| 1     | 10.521         | 170476      | 2937038       | 7.158    |
| 2     | 21.262         | 840009      | 38096801      | 92.842   |
| total |                | 1010484     | 41033840      | 100.000  |

HPLC chromatogram of compound **30** (90% ee)

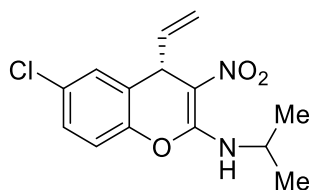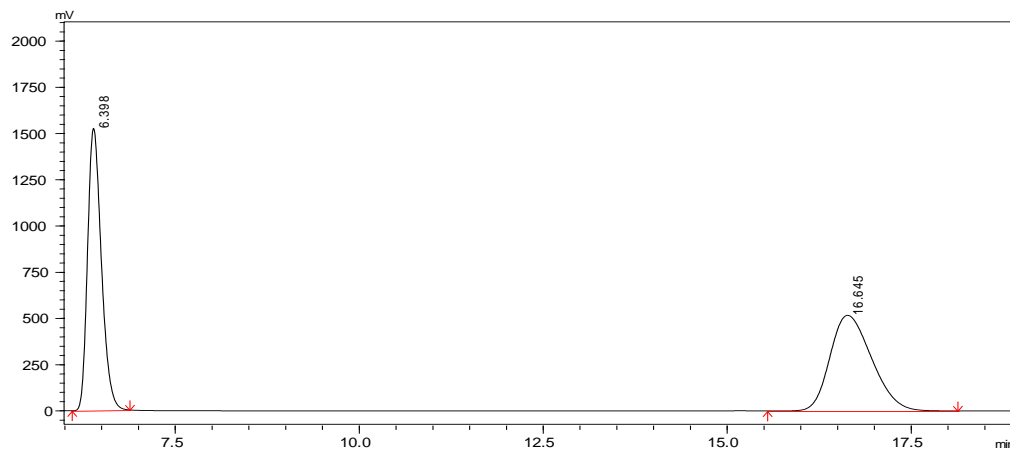

| #     | Ret Time (min) | Height ( $\mu$ V) | Area ( $\mu$ V.sec) | Area (%) |
|-------|----------------|-------------------|---------------------|----------|
| 1     | 6.398          | 1525611           | 19890080            | 49.476   |
| 2     | 16.645         | 516908            | 20310992            | 50.524   |
| total |                | 2042519           | 40201072            | 100.000  |

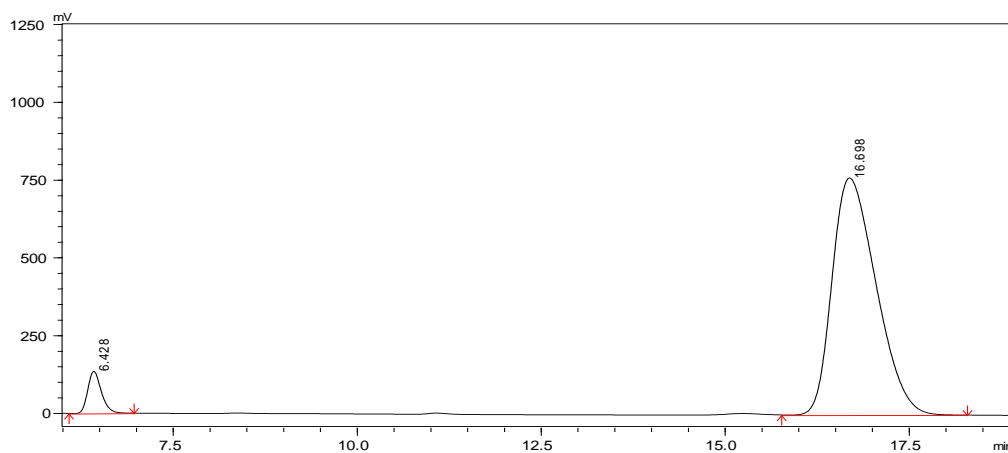

| #     | Ret Time (min) | Height ( $\mu$ V) | Area ( $\mu$ V.sec) | Area (%) |
|-------|----------------|-------------------|---------------------|----------|
| 1     | 6.428          | 134726            | 1725784             | 5.172    |
| 2     | 16.698         | 761855            | 31644702            | 94.828   |
| total |                | 896582            | 33370486            | 100.000  |



HPLC chromatogram of compound **31** (95% ee)

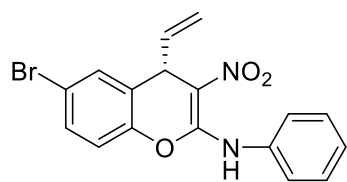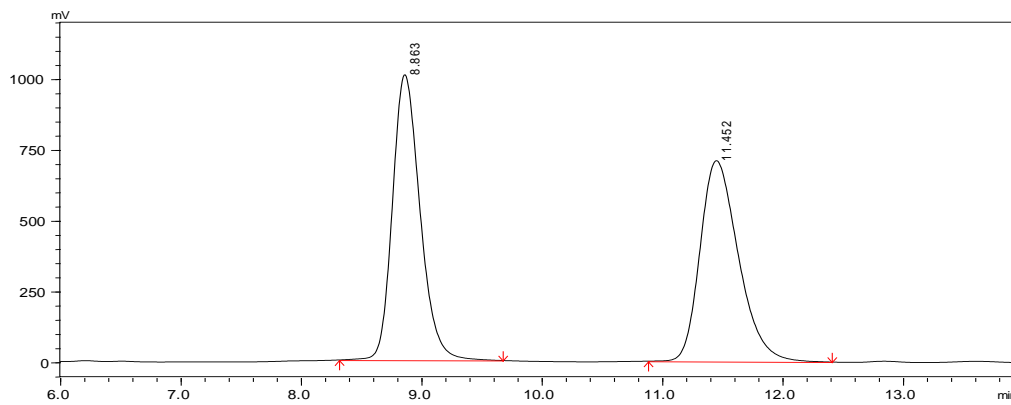

| #     | Ret Time (min) | Height (μV) | Area (μV.sec) | Area (%) |
|-------|----------------|-------------|---------------|----------|
| 1     | 8.863          | 1007857     | 16065706      | 50.545   |
| 2     | 11.452         | 709040      | 15719147      | 49.455   |
| total |                | 1716898     | 31784853      | 100.000  |

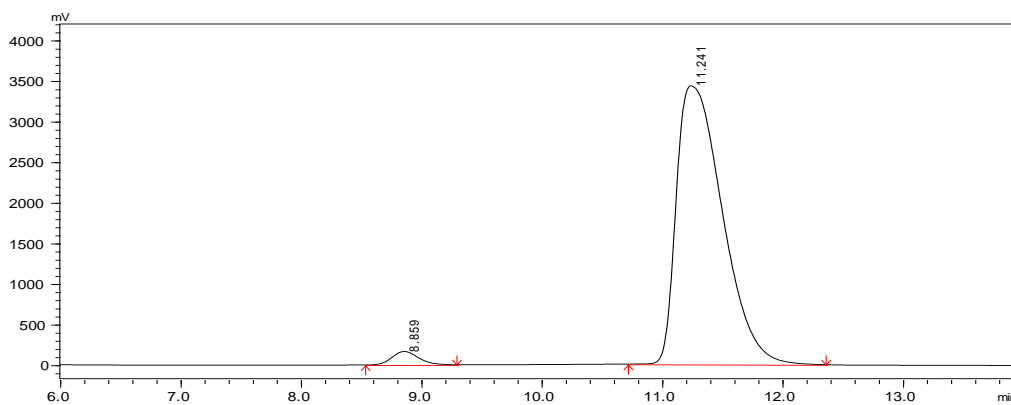

| #     | Ret Time (min) | Height (μV) | Area (μV.sec) | Area (%) |
|-------|----------------|-------------|---------------|----------|
| 1     | 8.859          | 165136      | 2509727       | 2.680    |
| 2     | 11.241         | 3430427     | 91142137      | 97.320   |
| total |                | 3595563     | 93651864      | 100.000  |

HPLC chromatogram of compound **32** (78% ee)

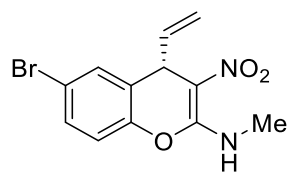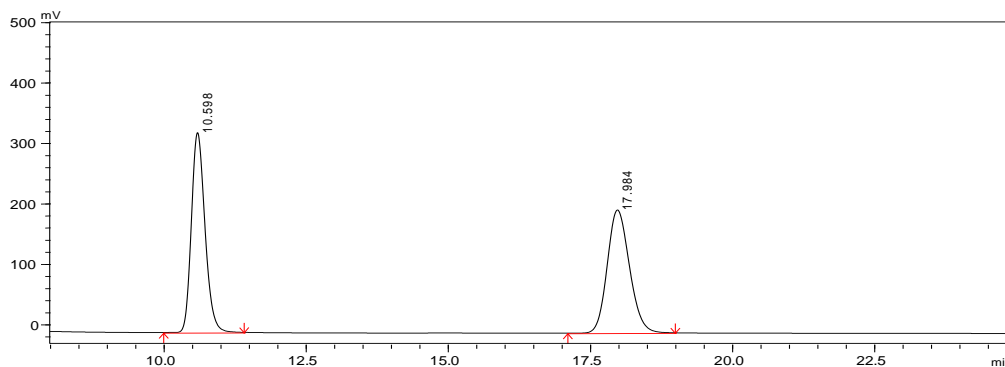

| #     | Ret Time (min) | Height ( $\mu$ V) | Area ( $\mu$ V.sec) | Area (%) |
|-------|----------------|-------------------|---------------------|----------|
| 1     | 10.598         | 330648            | 5506764             | 49.879   |
| 2     | 17.984         | 203583            | 5533393             | 50.121   |
| total |                | 534231            | 11040157            | 100.000  |

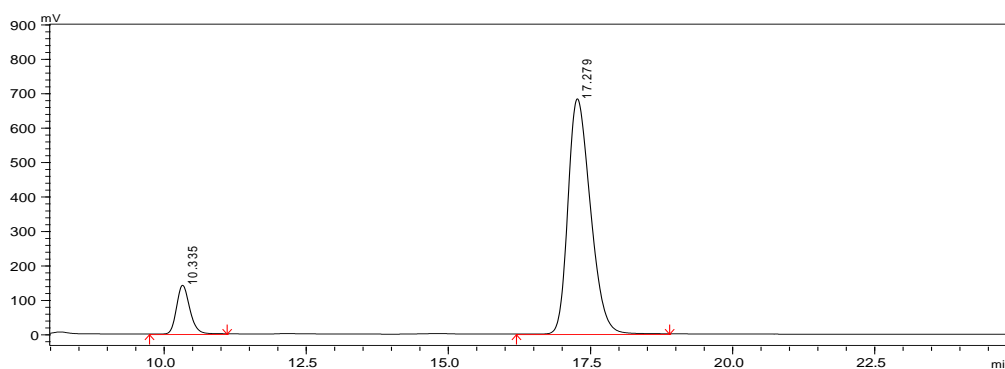

| #     | Ret Time (min) | Height ( $\mu$ V) | Area ( $\mu$ V.sec) | Area (%) |
|-------|----------------|-------------------|---------------------|----------|
| 1     | 10.335         | 141219            | 2263635             | 10.785   |
| 2     | 17.279         | 682869            | 18724401            | 89.215   |
| total |                | 824088            | 20988036            | 100.000  |

HPLC chromatogram of compound **33** (84% ee)

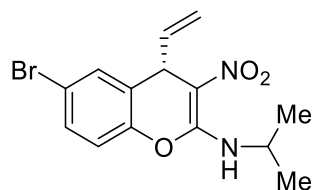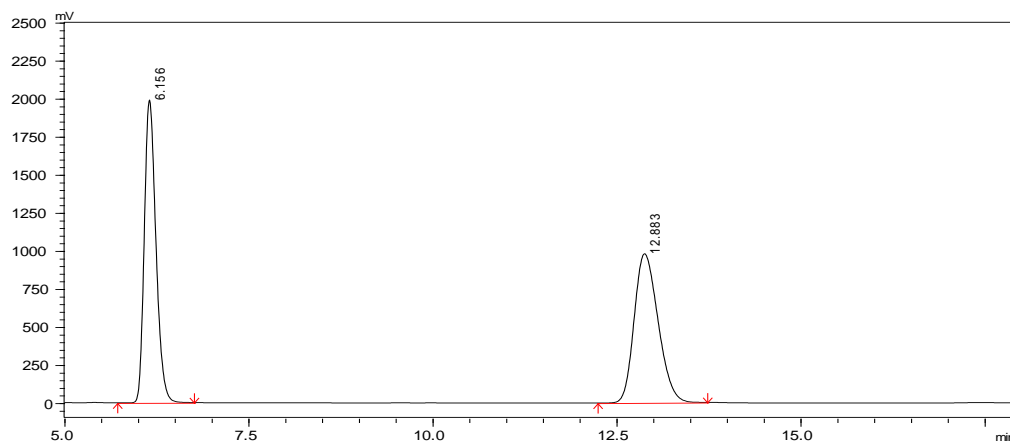

| #     | Ret Time (min) | Height (μV) | Area (μV.sec) | Area (%) |
|-------|----------------|-------------|---------------|----------|
| 1     | 6.156          | 1989005     | 21828064      | 49.726   |
| 2     | 12.883         | 978733      | 22068828      | 50.274   |
| total |                | 2967738     | 43896893      | 100.000  |

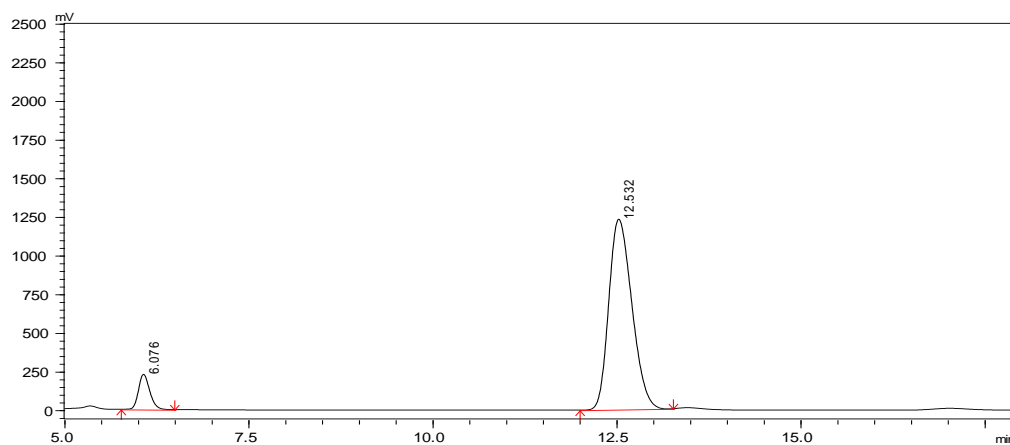

| #     | Ret Time (min) | Height (μV) | Area (μV.sec) | Area (%) |
|-------|----------------|-------------|---------------|----------|
| 1     | 6.076          | 227166      | 2408286       | 8.233    |
| 2     | 12.532         | 1231284     | 26841627      | 91.767   |
| total |                | 1458451     | 29249913      | 100.000  |

HPLC chromatogram of compound **34** (89% ee)

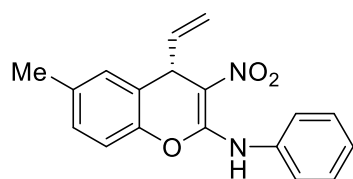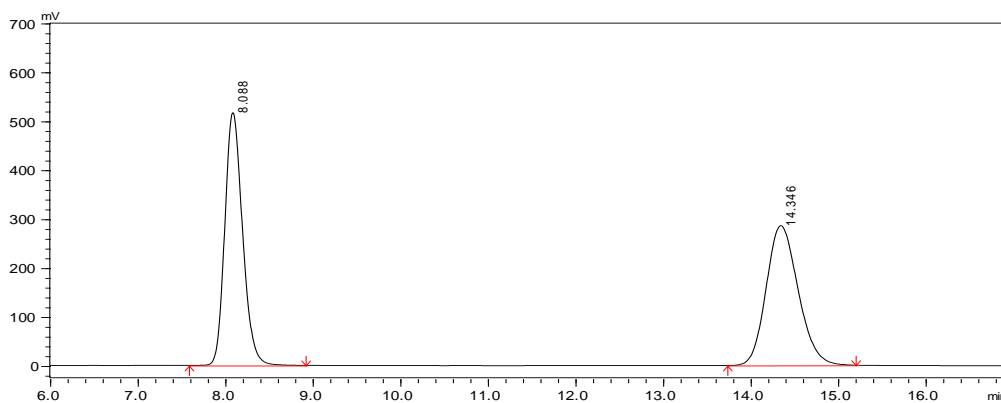

| #     | Ret Time (min) | Height ( $\mu$ V) | Area ( $\mu$ V.sec) | Area (%) |
|-------|----------------|-------------------|---------------------|----------|
| 1     | 8.088          | 515845            | 7274033             | 50.117   |
| 2     | 14.346         | 285520            | 7239946             | 49.883   |
| total |                | 801365            | 14513980            | 100.000  |

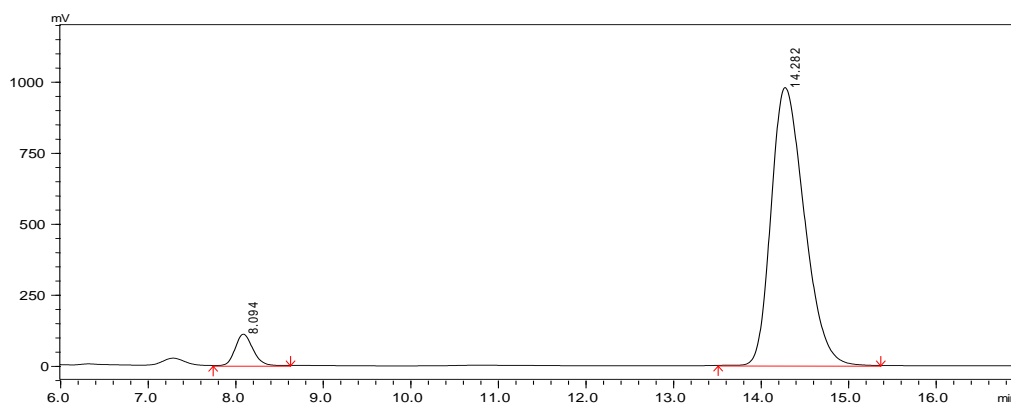

| #     | Ret Time (min) | Height ( $\mu$ V) | Area ( $\mu$ V.sec) | Area (%) |
|-------|----------------|-------------------|---------------------|----------|
| 1     | 8.094          | 110105            | 1521948             | 5.576    |
| 2     | 14.282         | 978247            | 25774975            | 94.424   |
| total |                | 1088353           | 27296923            | 100.000  |

HPLC chromatogram of compound **35** (64% ee)

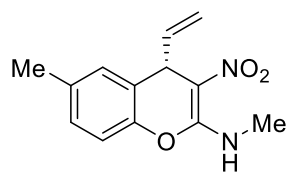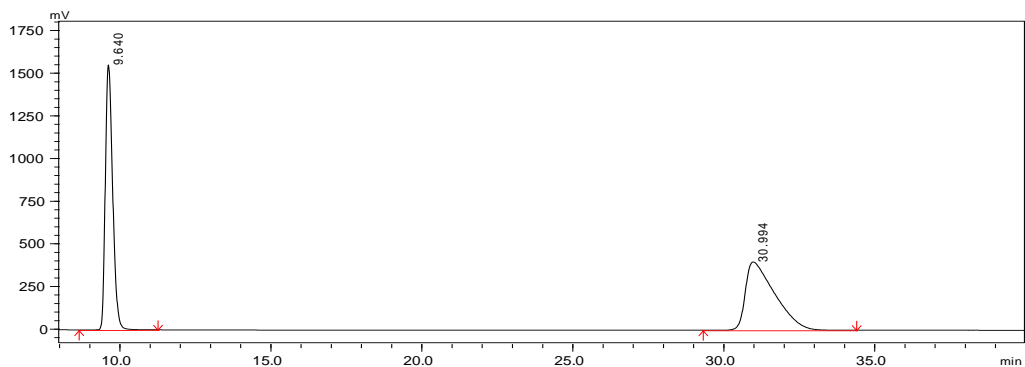

| #     | Ret Time (min) | Height ( $\mu$ V) | Area ( $\mu$ V.sec) | Area (%) |
|-------|----------------|-------------------|---------------------|----------|
| 1     | 9.640          | 1552308           | 26197899            | 49.379   |
| 2     | 30.994         | 399847            | 26856817            | 50.621   |
| total |                | 1952155           | 53054716            | 100.000  |

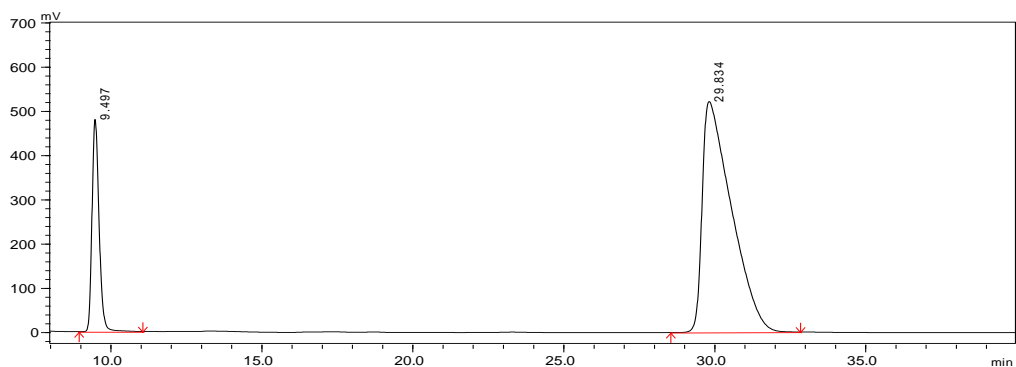

| #     | Ret Time (min) | Height ( $\mu$ V) | Area ( $\mu$ V.sec) | Area (%) |
|-------|----------------|-------------------|---------------------|----------|
| 1     | 9.497          | 479351            | 7804469             | 18.216   |
| 2     | 29.834         | 521435            | 35038696            | 81.784   |
| total |                | 1000786           | 42843165            | 100.000  |

HPLC chromatogram of compound **36** (65% ee)

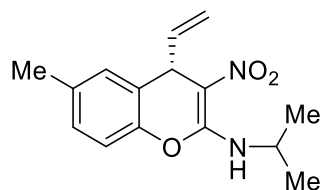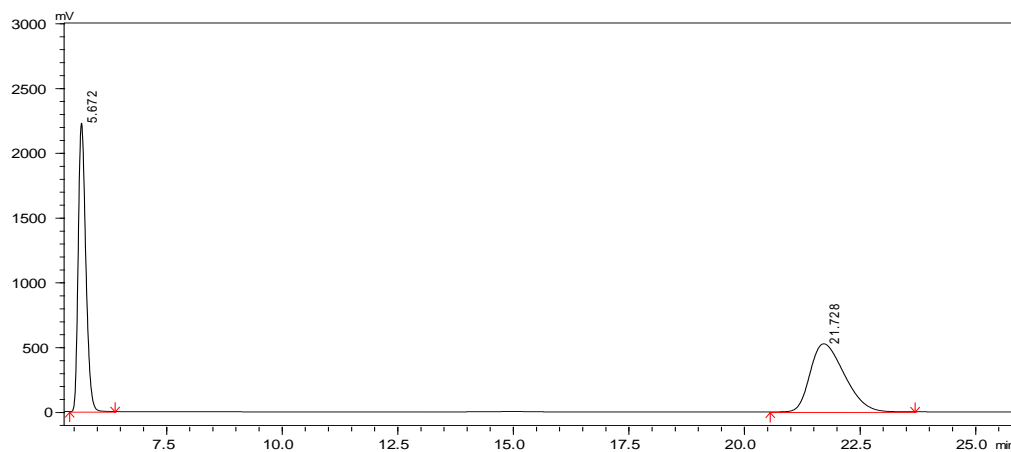

| #     | Ret Time (min) | Height (μV) | Area (μV.sec) | Area (%) |
|-------|----------------|-------------|---------------|----------|
| 1     | 5.672          | 2226840     | 25337790      | 48.450   |
| 2     | 21.728         | 525253      | 26959475      | 51.550   |
| total |                | 2752093     | 52297266      | 100.000  |

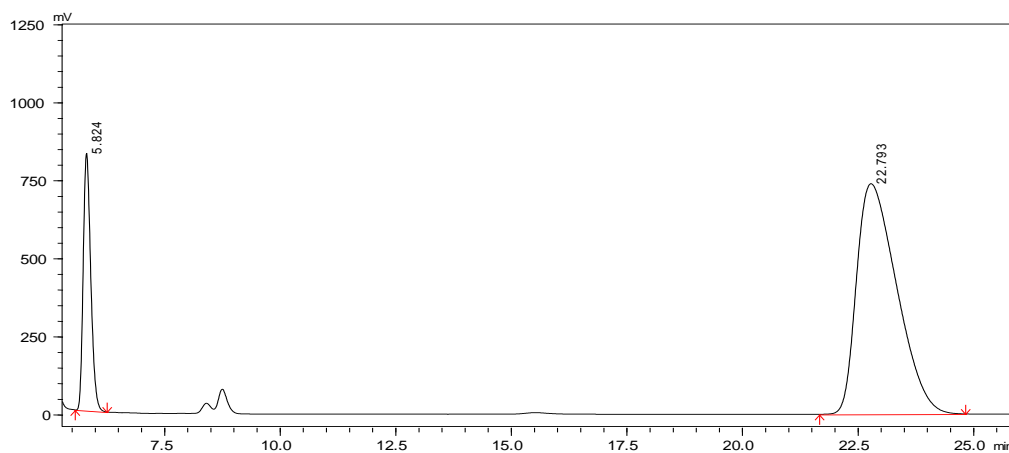

| #     | Ret Time (min) | Height (μV) | Area (μV.sec) | Area (%) |
|-------|----------------|-------------|---------------|----------|
| 1     | 5.824          | 824478      | 9337194       | 17.310   |
| 2     | 22.793         | 738604      | 44604995      | 82.690   |
| total |                | 1563082     | 53942189      | 100.000  |

HPLC chromatogram of compound **37** (99% ee)

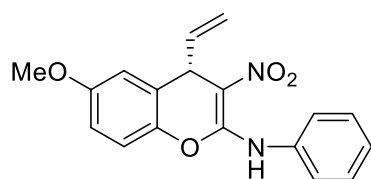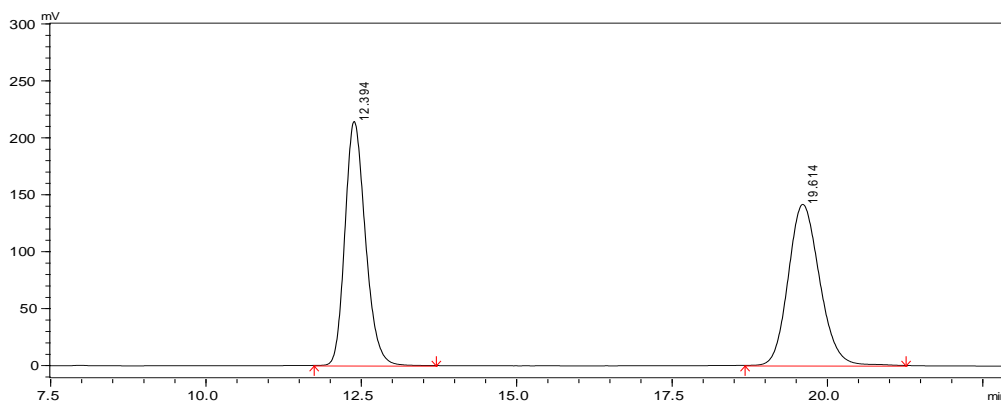

| #     | Ret Time (min) | Height ( $\mu$ V) | Area ( $\mu$ V.sec) | Area (%) |
|-------|----------------|-------------------|---------------------|----------|
| 1     | 12.394         | 214218            | 4905610             | 49.761   |
| 2     | 19.614         | 141352            | 4952637             | 50.239   |
| total |                | 355571            | 9858248             | 100.000  |

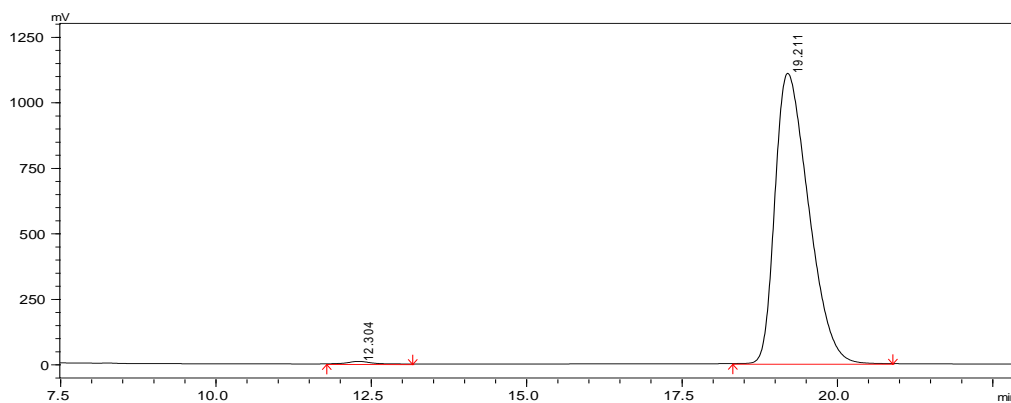

| #     | Ret Time (min) | Height ( $\mu$ V) | Area ( $\mu$ V.sec) | Area (%) |
|-------|----------------|-------------------|---------------------|----------|
| 1     | 12.304         | 9517              | 226452              | 0.541    |
| 2     | 19.211         | 1107837           | 41637041            | 99.459   |
| total |                | 1117354           | 41863493            | 100.000  |

HPLC chromatogram of compound **38** (52% ee)

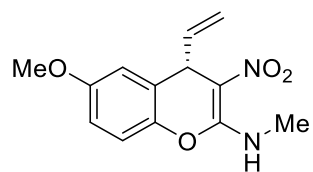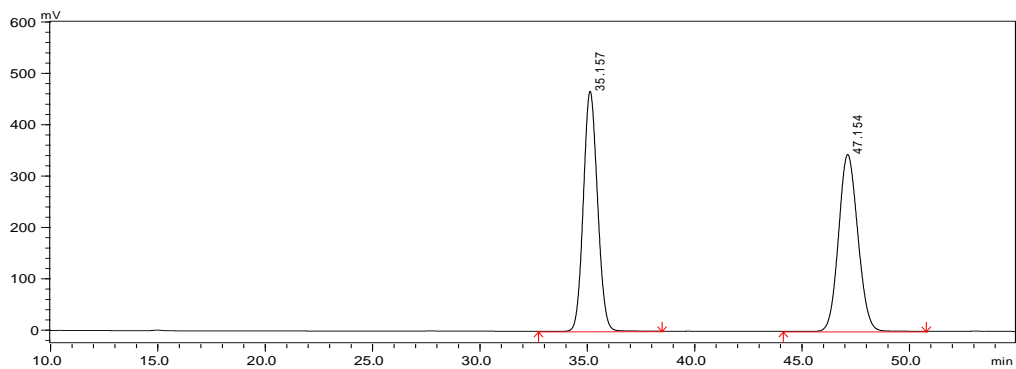

| #     | Ret Time (min) | Height ( $\mu$ V) | Area ( $\mu$ V.sec) | Area (%) |
|-------|----------------|-------------------|---------------------|----------|
| 1     | 35.157         | 467342            | 21403098            | 49.973   |
| 2     | 47.154         | 344353            | 21426524            | 50.027   |
| total |                | 811695            | 42829621            | 100.000  |

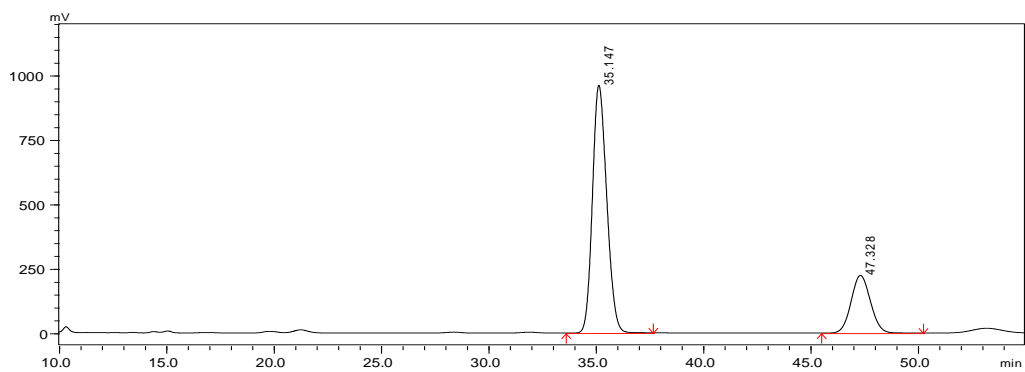

| #     | Ret Time (min) | Height ( $\mu$ V) | Area ( $\mu$ V.sec) | Area (%) |
|-------|----------------|-------------------|---------------------|----------|
| 1     | 35.147         | 961228            | 44452459            | 76.102   |
| 2     | 47.328         | 223788            | 13959346            | 23.898   |
| total |                | 1185017           | 58411805            | 100.000  |



HPLC chromatogram of compound **39** (41% ee)

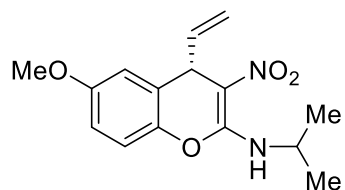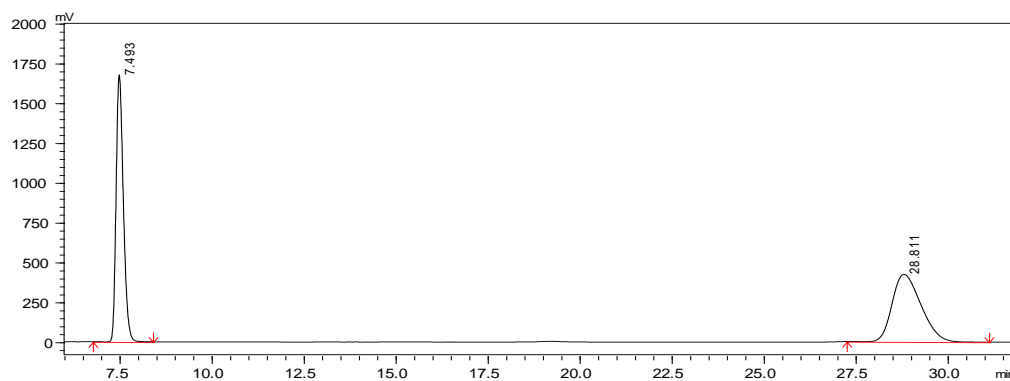

| #     | Ret Time (min) | Height (μV) | Area (μV.sec) | Area (%) |
|-------|----------------|-------------|---------------|----------|
| 1     | 7.493          | 1675805     | 22911516      | 49.958   |
| 2     | 28.811         | 423218      | 22949976      | 50.042   |
| total |                | 2099023     | 45861493      | 100.000  |

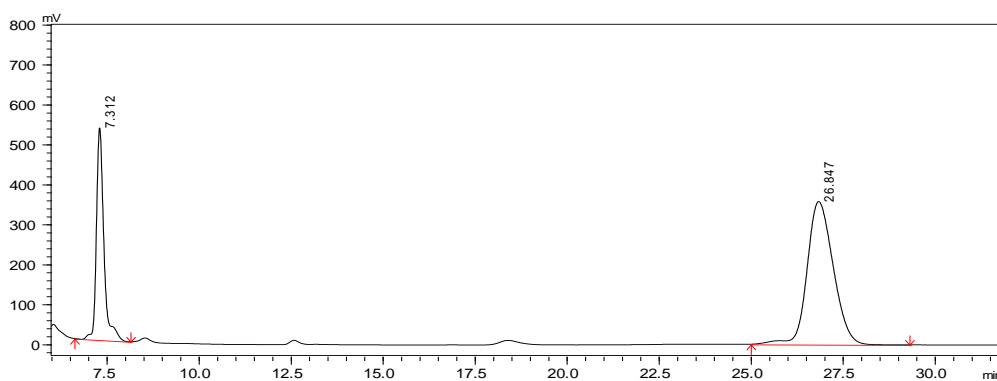

| #     | Ret Time (min) | Height (μV) | Area (μV.sec) | Area (%) |
|-------|----------------|-------------|---------------|----------|
| 1     | 7.312          | 530629      | 7439217       | 29.659   |
| 2     | 26.847         | 357610      | 17643676      | 70.341   |
| total |                | 888239      | 25082893      | 100.000  |

HPLC chromatogram of compound **40** (90% ee)

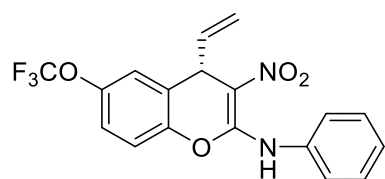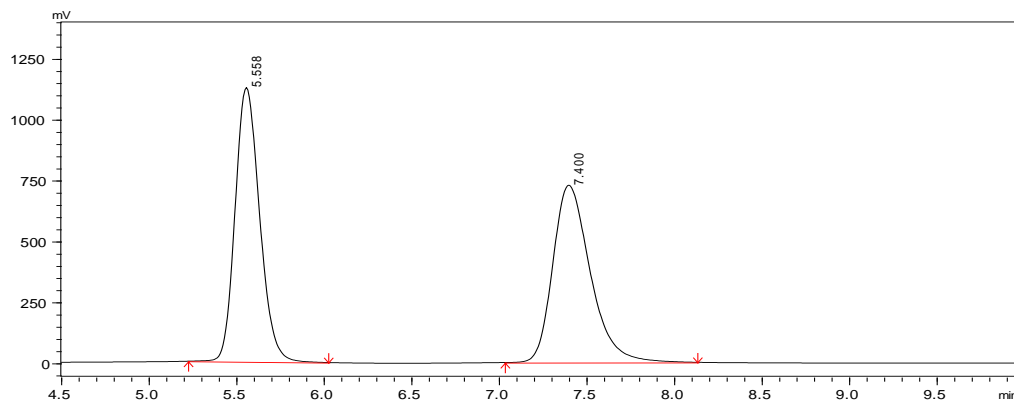

| #     | Ret Time (min) | Height (μV) | Area (μV.sec) | Area (%) |
|-------|----------------|-------------|---------------|----------|
| 1     | 5.558          | 1125806     | 10958656      | 50.368   |
| 2     | 7.400          | 727850      | 10798667      | 49.632   |
| total |                | 1853656     | 21757323      | 100.000  |

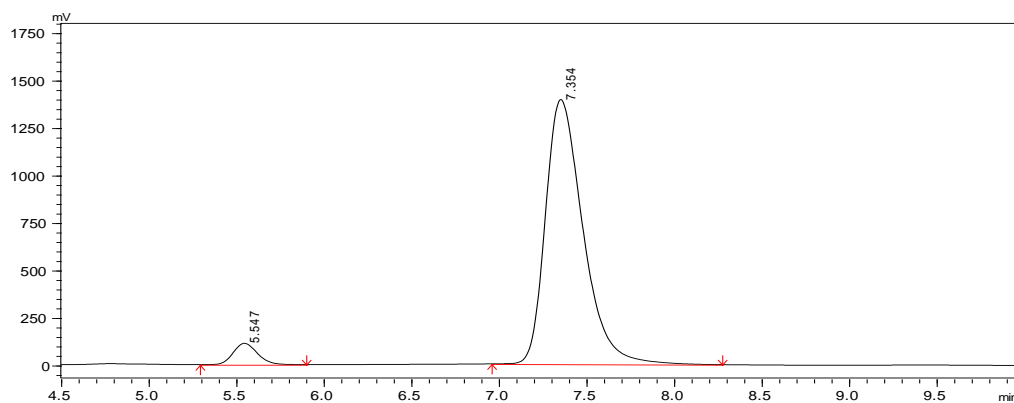

| #     | Ret Time (min) | Height (μV) | Area (μV.sec) | Area (%) |
|-------|----------------|-------------|---------------|----------|
| 1     | 5.547          | 111723      | 1069342       | 4.889    |
| 2     | 7.354          | 1393405     | 20803295      | 95.111   |
| total |                | 1505127     | 21872637      | 100.000  |

HPLC chromatogram of compound **41** (77% ee)

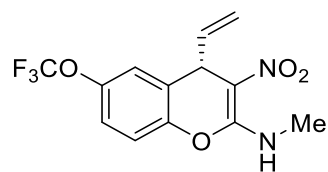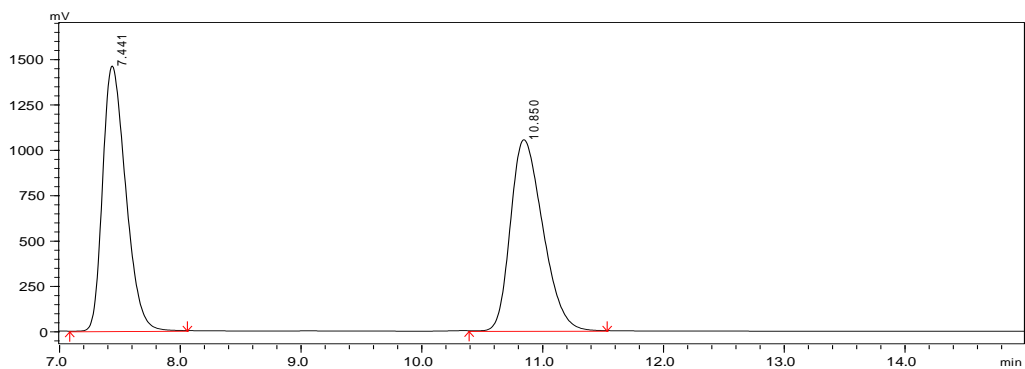

| #     | Ret Time (min) | Height (μV) | Area (μV.sec) | Area (%) |
|-------|----------------|-------------|---------------|----------|
| 1     | 7.441          | 1460040     | 19354704      | 49.793   |
| 2     | 10.850         | 1052696     | 19515503      | 50.207   |
| total |                | 2512736     | 38870207      | 100.000  |

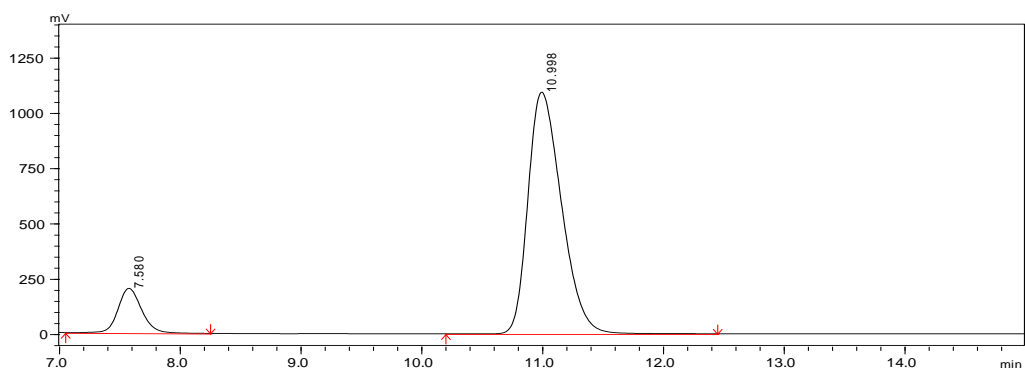

| #     | Ret Time (min) | Height (μV) | Area (μV.sec) | Area (%) |
|-------|----------------|-------------|---------------|----------|
| 1     | 7.580          | 201239      | 2726261       | 11.476   |
| 2     | 10.998         | 1092736     | 21029778      | 88.524   |
| total |                | 1293975     | 23756039      | 100.000  |

HPLC chromatogram of compound **42** (84% ee)

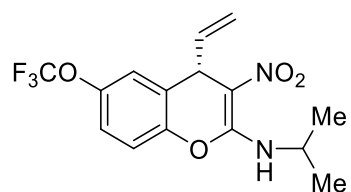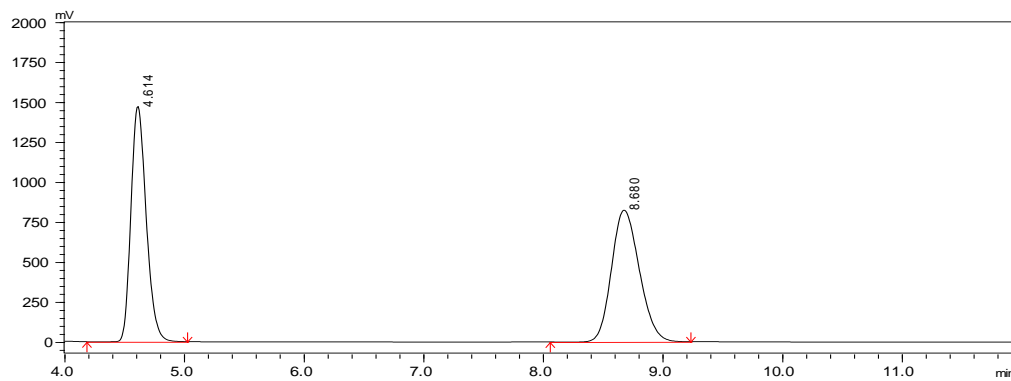

| #     | Ret Time (min) | Height (μV) | Area (μV.sec) | Area (%) |
|-------|----------------|-------------|---------------|----------|
| 1     | 4.614          | 1470601     | 13053224      | 49.515   |
| 2     | 8.680          | 823377      | 13308758      | 50.485   |
| total |                | 2293977     | 26361982      | 100.000  |

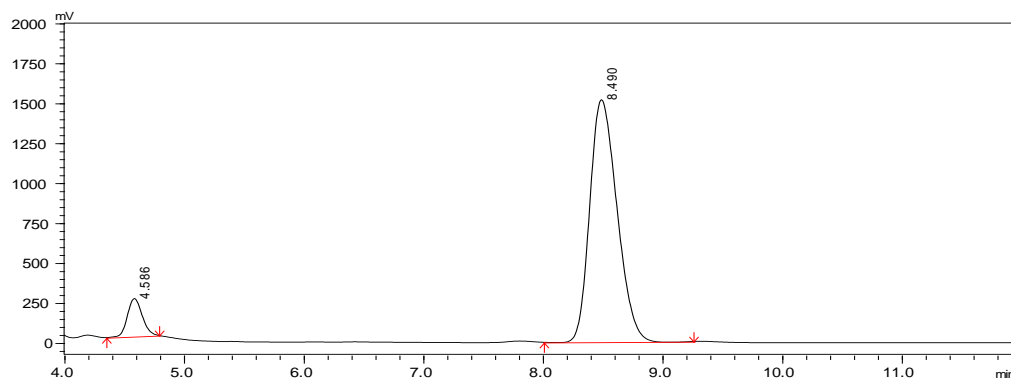

| #     | Ret Time (min) | Height (μV) | Area (μV.sec) | Area (%) |
|-------|----------------|-------------|---------------|----------|
| 1     | 4.586          | 236945      | 2039891       | 7.861    |
| 2     | 8.490          | 1516389     | 23908939      | 92.139   |
| total |                | 1753334     | 25948830      | 100.000  |

HPLC chromatogram of compound **43** (95% ee)

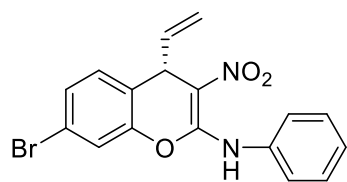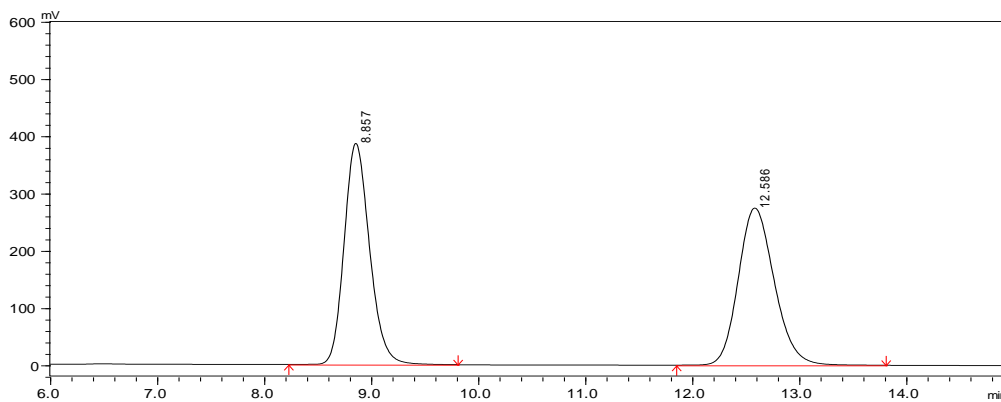

| #     | Ret Time (min) | Height ( $\mu\text{V}$ ) | Area ( $\mu\text{V}\cdot\text{sec}$ ) | Area (%) |
|-------|----------------|--------------------------|---------------------------------------|----------|
| 1     | 8.857          | 386252                   | 6382161                               | 49.881   |
| 2     | 12.586         | 274444                   | 6412624                               | 50.119   |
| total |                | 660696                   | 12794784                              | 100.000  |

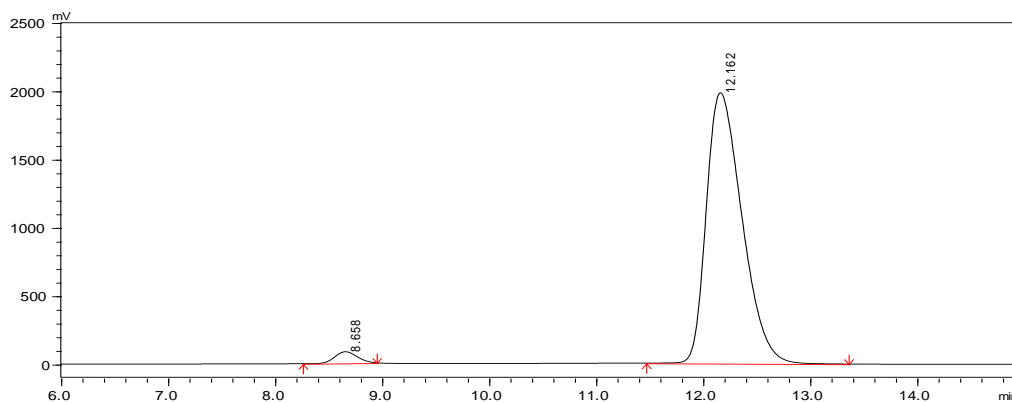

| #     | Ret Time (min) | Height ( $\mu\text{V}$ ) | Area ( $\mu\text{V}\cdot\text{sec}$ ) | Area (%) |
|-------|----------------|--------------------------|---------------------------------------|----------|
| 1     | 8.658          | 83965                    | 1215526                               | 2.584    |
| 2     | 12.162         | 1981474                  | 45831851                              | 97.416   |
| total |                | 2065440                  | 47047377                              | 100.000  |

HPLC chromatogram of compound **44** (74% ee)

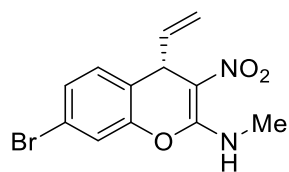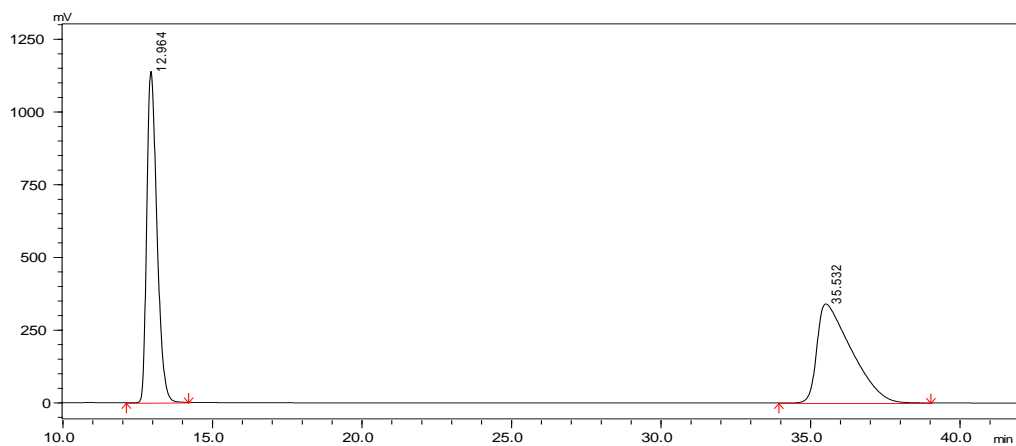

| #     | Ret Time (min) | Height (μV) | Area (μV.sec) | Area (%) |
|-------|----------------|-------------|---------------|----------|
| 1     | 12.964         | 1138159     | 26950117      | 49.809   |
| 2     | 35.532         | 340561      | 27156369      | 50.191   |
| total |                | 1478719     | 54106487      | 100.000  |

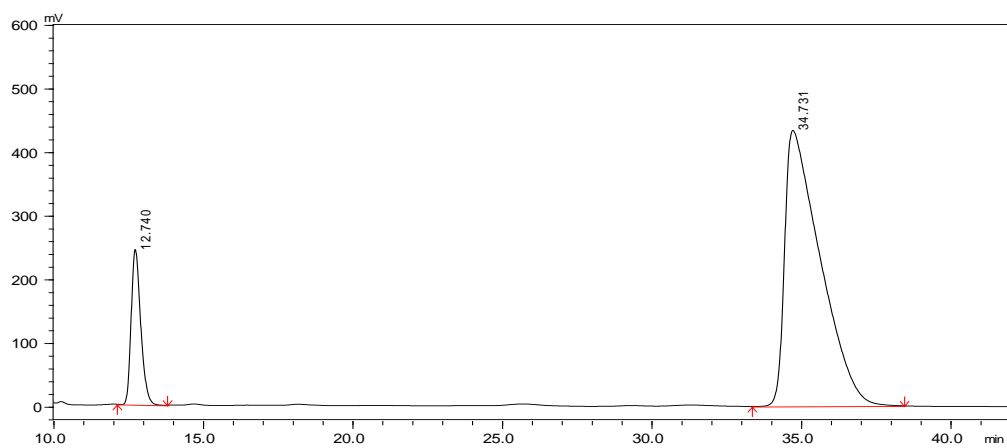

| #     | Ret Time (min) | Height (μV) | Area (μV.sec) | Area (%) |
|-------|----------------|-------------|---------------|----------|
| 1     | 12.740         | 243671      | 5394425       | 13.085   |
| 2     | 34.731         | 433618      | 35830557      | 86.915   |
| total |                | 677288      | 41224983      | 100.000  |

HPLC chromatogram of compound **45** (64% ee)

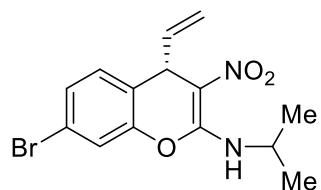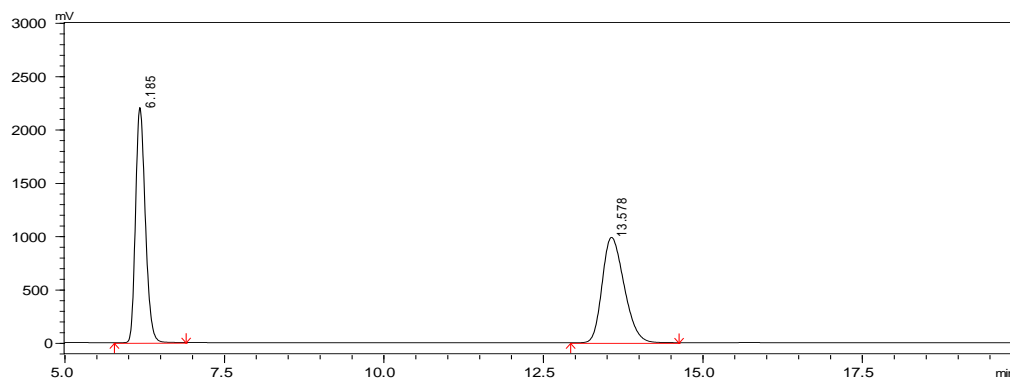

| #     | Ret Time (min) | Height ( $\mu$ V) | Area ( $\mu$ V.sec) | Area (%) |
|-------|----------------|-------------------|---------------------|----------|
| 1     | 6.185          | 2203015           | 23402583            | 49.771   |
| 2     | 13.578         | 987202            | 23617967            | 50.229   |
| total |                | 3190217           | 47020550            | 100.000  |

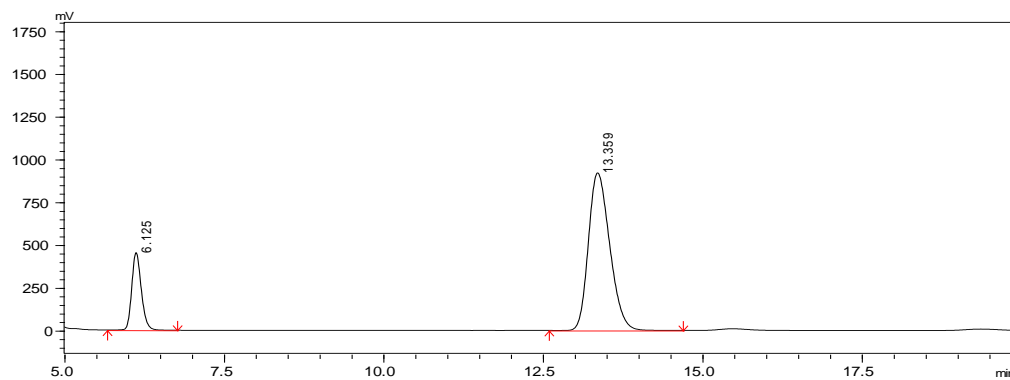

| #     | Ret Time (min) | Height ( $\mu$ V) | Area ( $\mu$ V.sec) | Area (%) |
|-------|----------------|-------------------|---------------------|----------|
| 1     | 6.125          | 453023            | 4720150             | 18.071   |
| 2     | 13.359         | 920958            | 21400425            | 81.929   |
| total |                | 1373981           | 26120576            | 100.000  |

HPLC chromatogram of compound **46** (88% ee)

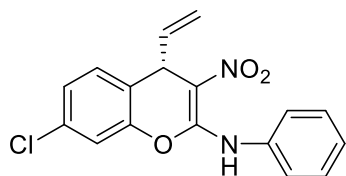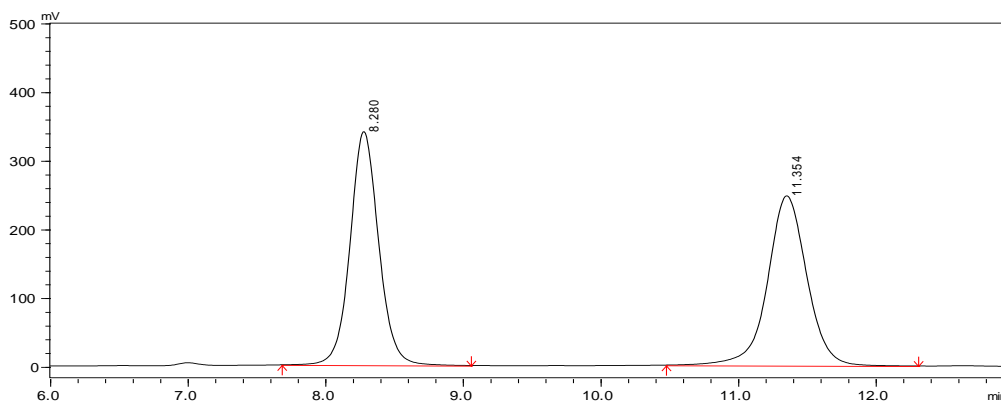

| #     | Ret Time (min) | Height (μV) | Area (μV.sec) | Area (%) |
|-------|----------------|-------------|---------------|----------|
| 1     | 8.280          | 339992      | 4920512       | 50.125   |
| 2     | 11.354         | 246908      | 4896025       | 49.875   |
| total |                | 586900      | 9816537       | 100.000  |

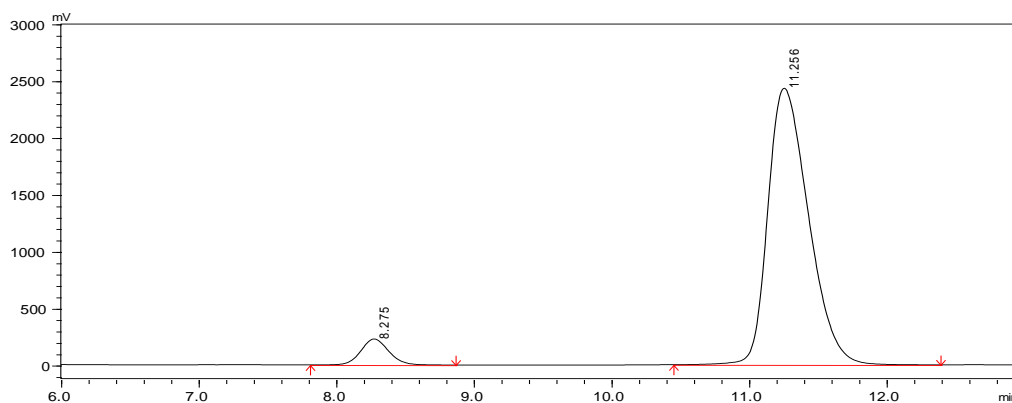

| #     | Ret Time (min) | Height (μV) | Area (μV.sec) | Area (%) |
|-------|----------------|-------------|---------------|----------|
| 1     | 8.275          | 227988      | 3220365       | 6.068    |
| 2     | 11.256         | 2430018     | 49855048      | 93.932   |
| total |                | 2658006     | 53075413      | 100.000  |



HPLC chromatogram of compound **47** (89% ee)

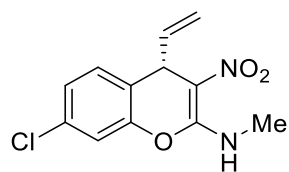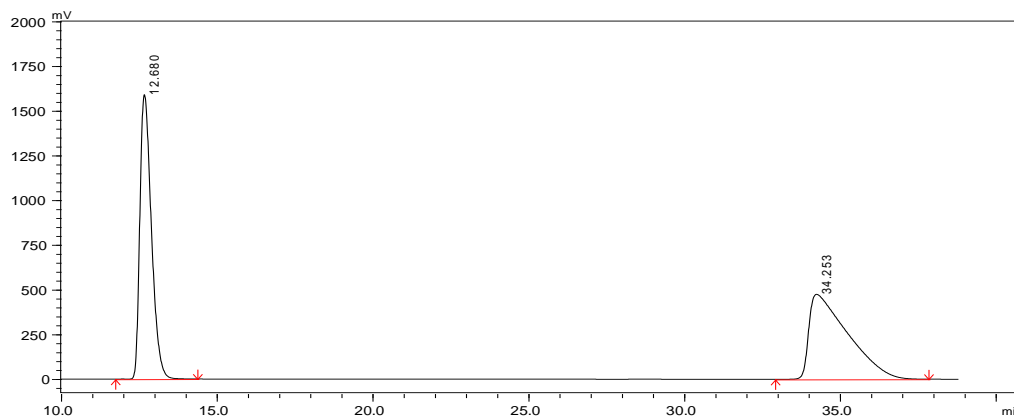

| #     | Ret Time (min) | Height (μV) | Area (μV.sec) | Area (%) |
|-------|----------------|-------------|---------------|----------|
| 1     | 12.680         | 1590278     | 40908556      | 49.924   |
| 2     | 34.253         | 474724      | 41033360      | 50.076   |
| total |                | 2065001     | 81941916      | 100.000  |

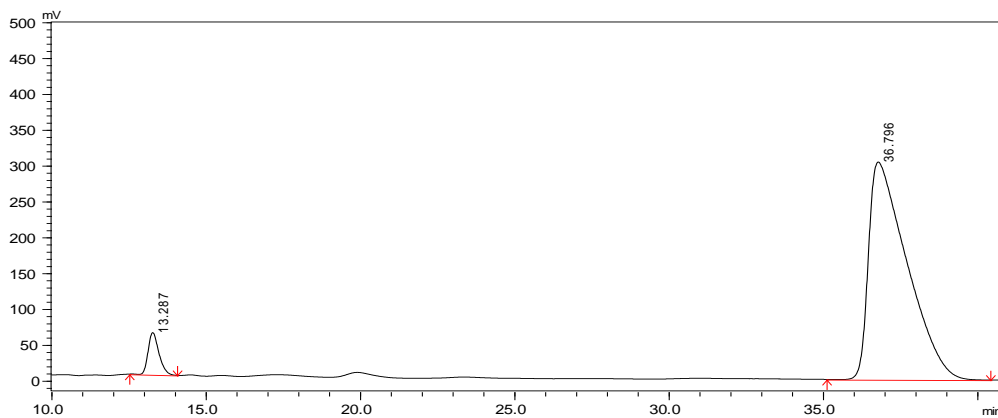

| #     | Ret Time (min) | Height (μV) | Area (μV.sec) | Area (%) |
|-------|----------------|-------------|---------------|----------|
| 1     | 13.287         | 58803       | 1427212       | 5.257    |
| 2     | 36.796         | 303472      | 26248762      | 94.743   |
| total |                | 362275      | 27675974      | 100.000  |

HPLC chromatogram of compound **48** (78% ee)

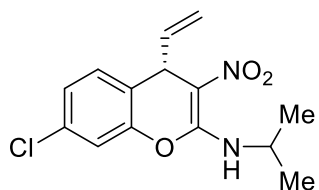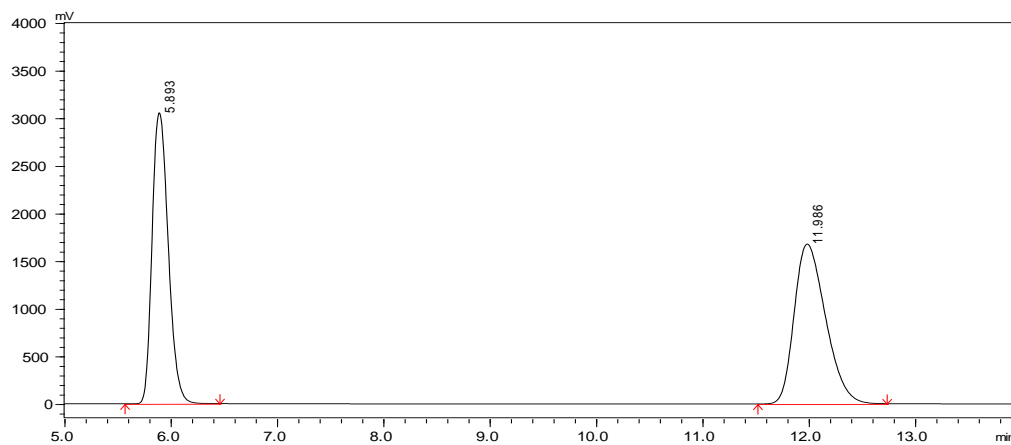

| #     | Ret Time (min) | Height (μV) | Area (μV.sec) | Area (%) |
|-------|----------------|-------------|---------------|----------|
| 1     | 5.893          | 3054885     | 32308342      | 48.465   |
| 2     | 11.986         | 1677372     | 34354721      | 51.535   |
| total |                | 4732256     | 66663063      | 100.000  |

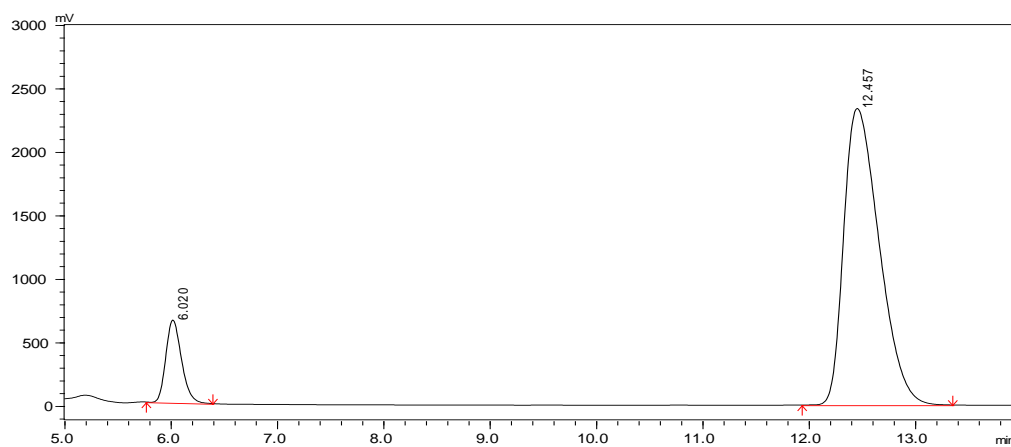

| #     | Ret Time (min) | Height (μV) | Area (μV.sec) | Area (%) |
|-------|----------------|-------------|---------------|----------|
| 1     | 6.020          | 650157      | 6632355       | 10.929   |
| 2     | 12.457         | 2335613     | 54051271      | 89.071   |
| total |                | 2985770     | 60683626      | 100.000  |

HPLC chromatogram of compound **49** (69% ee)

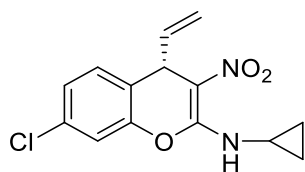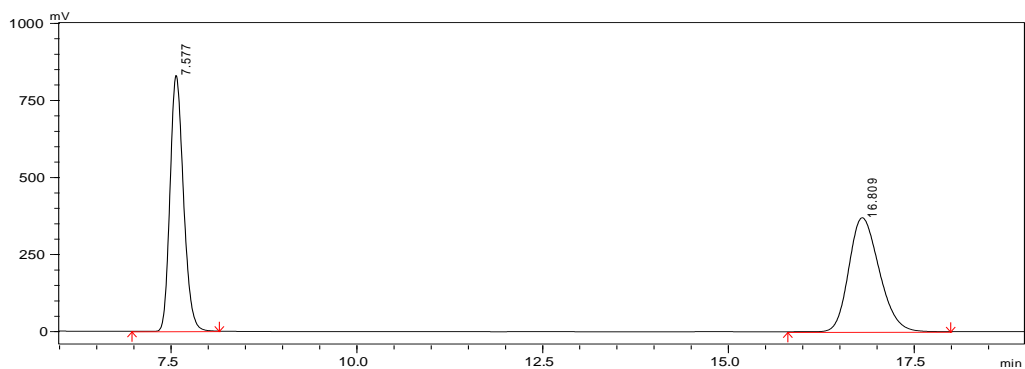

| #     | Ret Time (min) | Height (μV) | Area (μV.sec) | Area (%) |
|-------|----------------|-------------|---------------|----------|
| 1     | 7.577          | 829487      | 10425470      | 49.825   |
| 2     | 16.809         | 369662      | 10498529      | 50.175   |
| total |                | 1199149     | 20923999      | 100.000  |

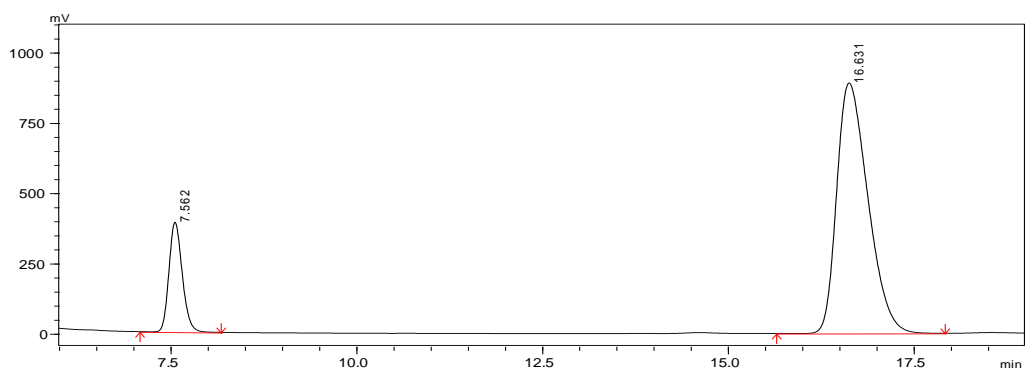

| #     | Ret Time (min) | Height (μV) | Area (μV.sec) | Area (%) |
|-------|----------------|-------------|---------------|----------|
| 1     | 7.562          | 390108      | 4850589       | 15.732   |
| 2     | 16.631         | 890663      | 25982111      | 84.268   |
| total |                | 1280771     | 30832700      | 100.000  |

HPLC chromatogram of compound **50** (58% ee)

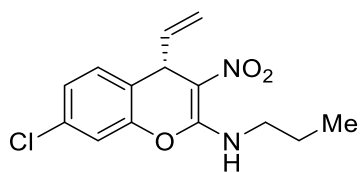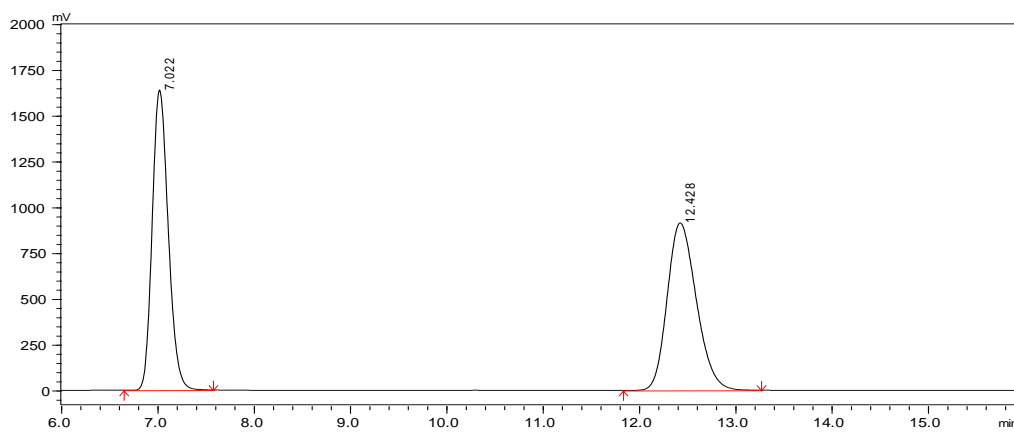

| #     | Ret Time (min) | Height (μV) | Area (μV.sec) | Area (%) |
|-------|----------------|-------------|---------------|----------|
| 1     | 7.022          | 1639262     | 18992151      | 49.729   |
| 2     | 12.428         | 914206      | 19199178      | 50.271   |
| total |                | 2553468     | 38191330      | 100.000  |

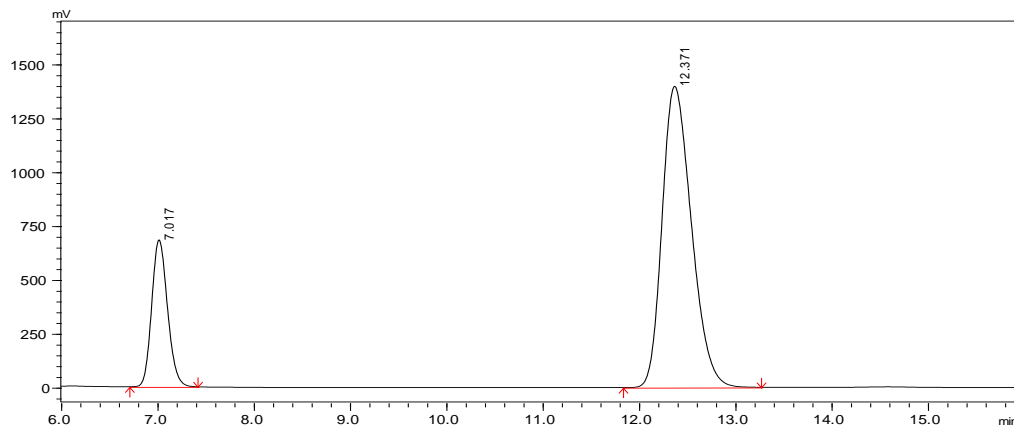

| #     | Ret Time (min) | Height (μV) | Area (μV.sec) | Area (%) |
|-------|----------------|-------------|---------------|----------|
| 1     | 7.017          | 682150      | 7780533       | 20.845   |
| 2     | 12.371         | 1397638     | 29545194      | 79.155   |
| total |                | 2079789     | 37325727      | 100.000  |

HPLC chromatogram of compound **51** (99% ee)

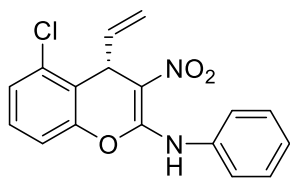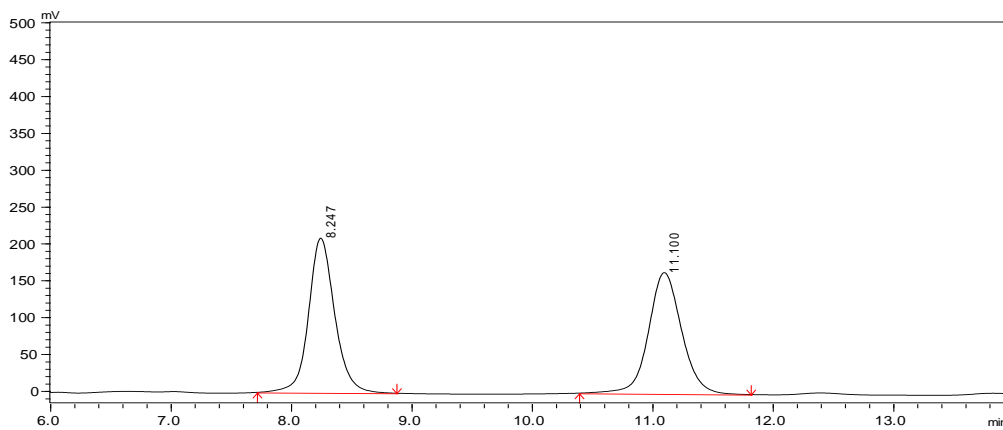

| #     | Ret Time (min) | Height (μV) | Area (μV.sec) | Area (%) |
|-------|----------------|-------------|---------------|----------|
| 1     | 8.247          | 209724      | 3166081       | 50.203   |
| 2     | 11.100         | 164486      | 3140478       | 49.797   |
| total |                | 374211      | 6306559       | 100.000  |

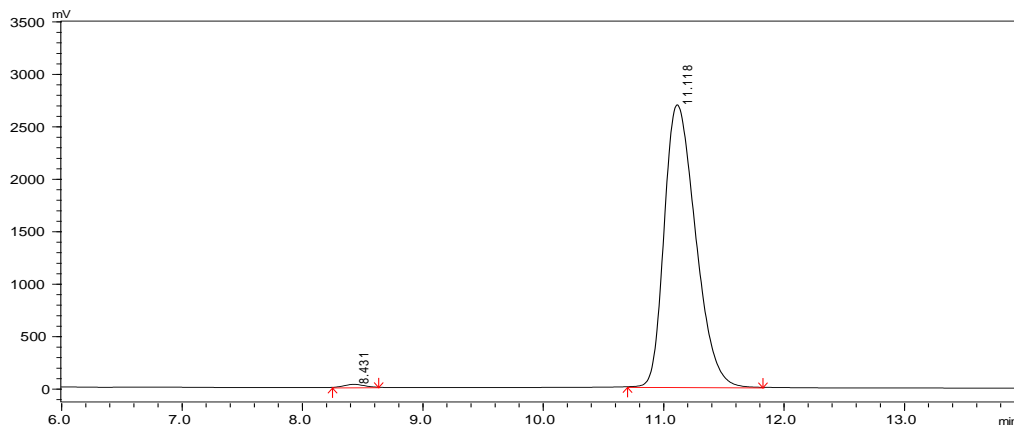

| #     | Ret Time (min) | Height (μV) | Area (μV.sec) | Area (%) |
|-------|----------------|-------------|---------------|----------|
| 1     | 8.431          | 27916       | 312867        | 0.640    |
| 2     | 11.118         | 2689129     | 48568585      | 99.360   |
| total |                | 2717045     | 48881452      | 100.000  |

HPLC chromatogram of compound **52** (92% ee)

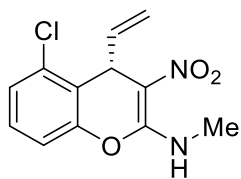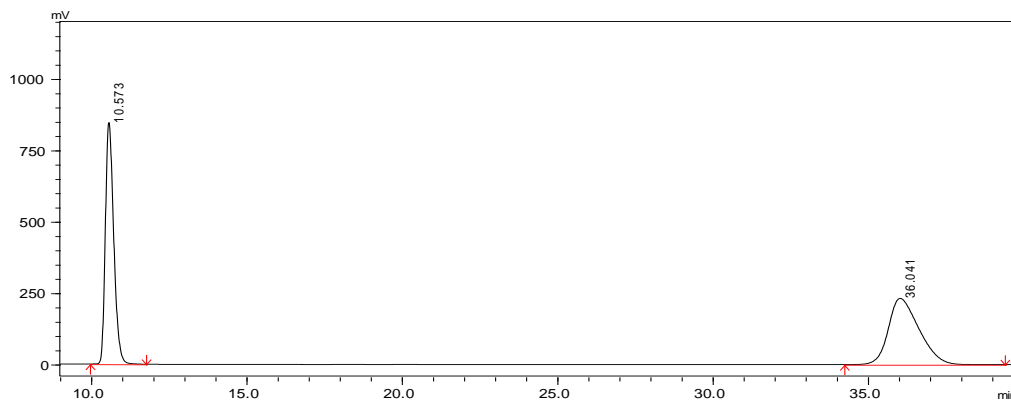

| #     | Ret Time (min) | Height (μV) | Area (μV.sec) | Area (%) |
|-------|----------------|-------------|---------------|----------|
| 1     | 10.573         | 845758      | 15812878      | 49.878   |
| 2     | 36.041         | 231900      | 15889979      | 50.122   |
| total |                | 1077658     | 31702856      | 100.000  |

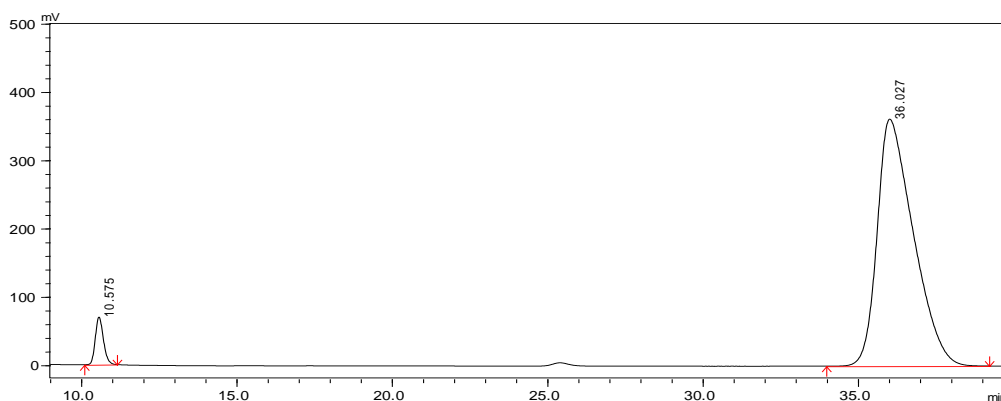

| #     | Ret Time (min) | Height (μV) | Area (μV.sec) | Area (%) |
|-------|----------------|-------------|---------------|----------|
| 1     | 10.575         | 69686       | 1267136       | 4.147    |
| 2     | 36.027         | 361584      | 29291276      | 95.853   |
| total |                | 431270      | 30558413      | 100.000  |

HPLC chromatogram of compound **53** (57% ee)

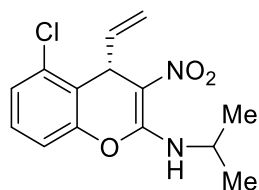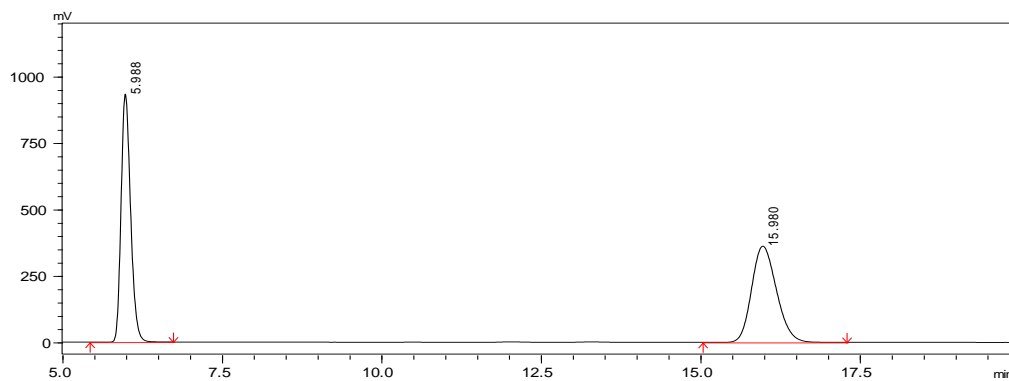

| #     | Ret Time (min) | Height (μV) | Area (μV.sec) | Area (%) |
|-------|----------------|-------------|---------------|----------|
| 1     | 5.988          | 932159      | 9711519       | 49.812   |
| 2     | 15.980         | 361754      | 9784699       | 50.188   |
| total |                | 1293913     | 19496218      | 100.000  |

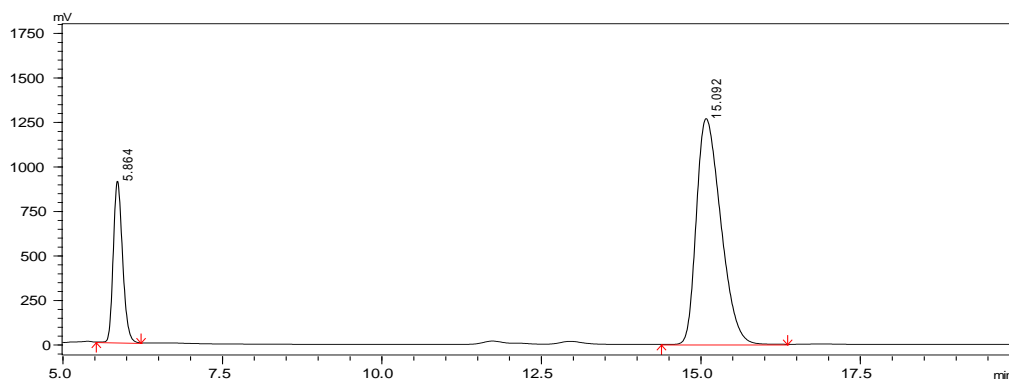

| #     | Ret Time (min) | Height (μV) | Area (μV.sec) | Area (%) |
|-------|----------------|-------------|---------------|----------|
| 1     | 5.864          | 905563      | 9150006       | 21.367   |
| 2     | 15.092         | 1268308     | 33672950      | 78.633   |
| total |                | 2173871     | 42822956      | 100.000  |

HPLC chromatogram of compound **54** (72% ee)

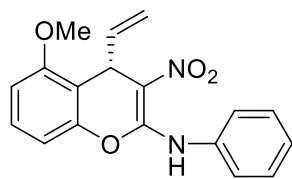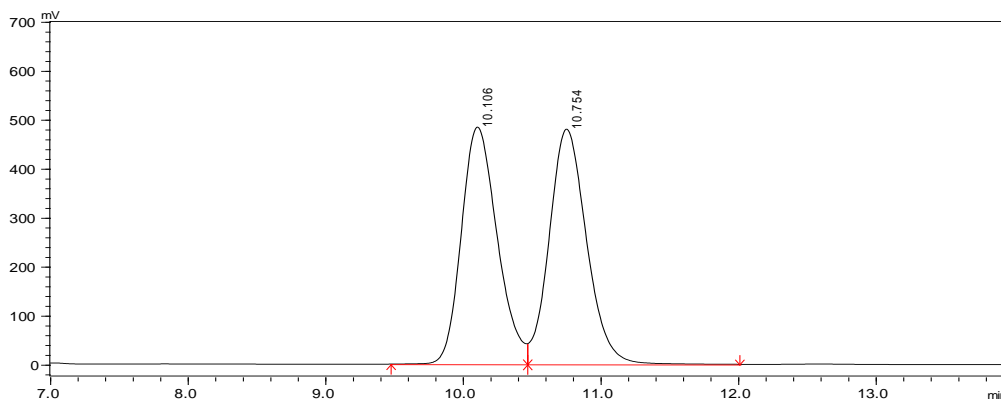

| #     | Ret Time (min) | Height (μV) | Area (μV.sec) | Area (%) |
|-------|----------------|-------------|---------------|----------|
| 1     | 10.106         | 484215      | 8773943       | 49.302   |
| 2     | 10.754         | 479761      | 9022529       | 50.698   |
| total |                | 963976      | 17796472      | 100.000  |

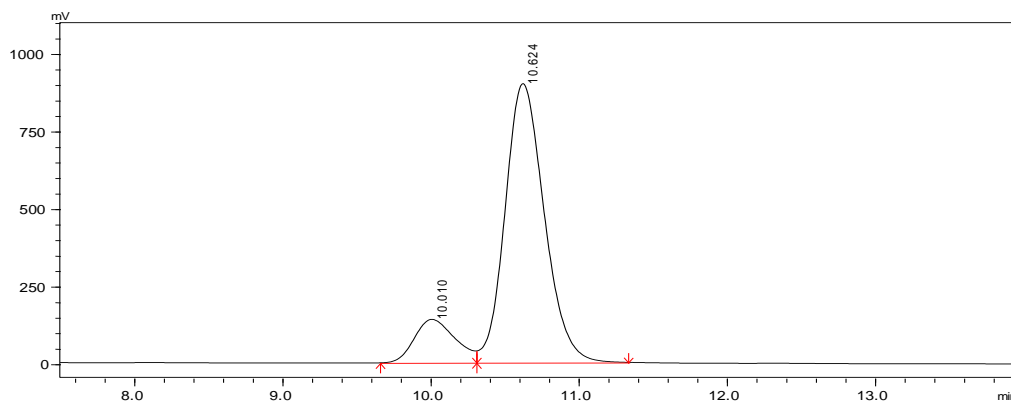

| #     | Ret Time (min) | Height (μV) | Area (μV.sec) | Area (%) |
|-------|----------------|-------------|---------------|----------|
| 1     | 10.010         | 139948      | 2677369       | 13.939   |
| 2     | 10.624         | 899600      | 16529884      | 86.061   |
| total |                | 1039548     | 19207253      | 100.000  |



HPLC chromatogram of compound **55** (70% ee)

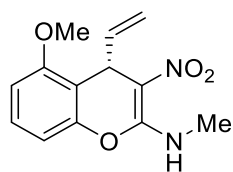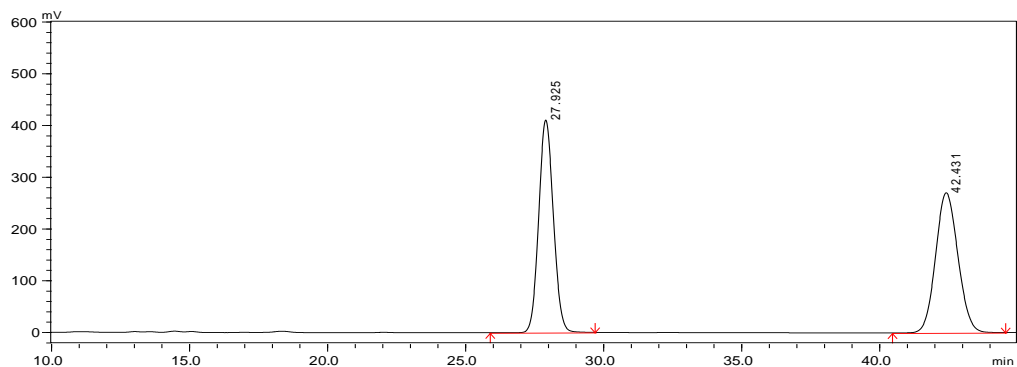

| #     | Ret Time (min) | Height (μV) | Area (μV.sec) | Area (%) |
|-------|----------------|-------------|---------------|----------|
| 1     | 27.925         | 410695      | 15167657      | 49.983   |
| 2     | 42.431         | 270394      | 15177820      | 50.017   |
| total |                | 681089      | 30345477      | 100.000  |

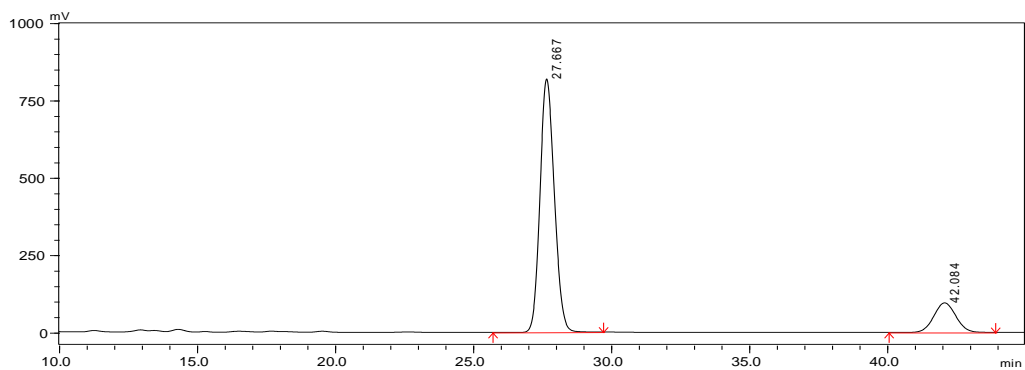

| #     | Ret Time (min) | Height (μV) | Area (μV.sec) | Area (%) |
|-------|----------------|-------------|---------------|----------|
| 1     | 27.667         | 818148      | 29501904      | 84.829   |
| 2     | 42.084         | 95260       | 5276082       | 15.171   |
| total |                | 913408      | 34777986      | 100.000  |

HPLC chromatogram of compound **56** (90% ee)

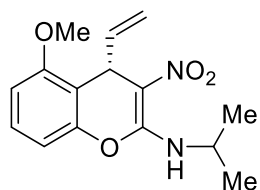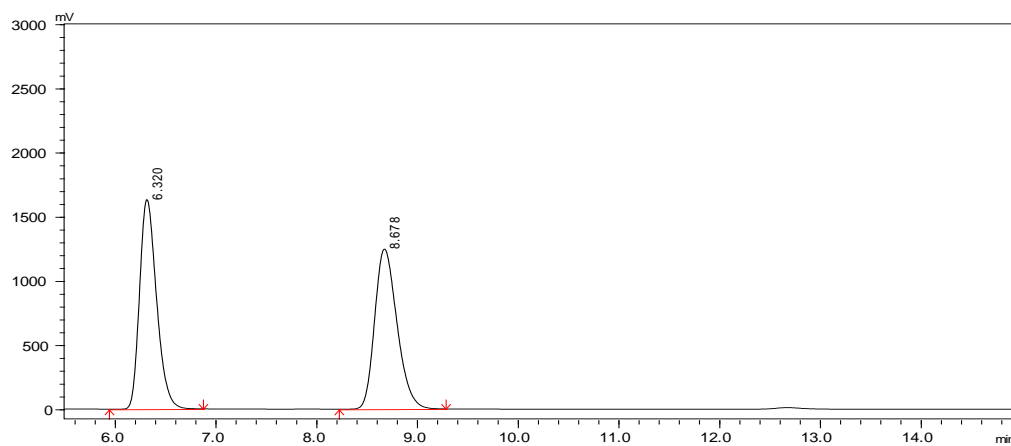

| #     | Ret Time (min) | Height (μV) | Area (μV.sec) | Area (%) |
|-------|----------------|-------------|---------------|----------|
| 1     | 6.320          | 1630529     | 19144478      | 49.908   |
| 2     | 8.678          | 1246053     | 19214937      | 50.092   |
| total |                | 2876582     | 38359415      | 100.000  |

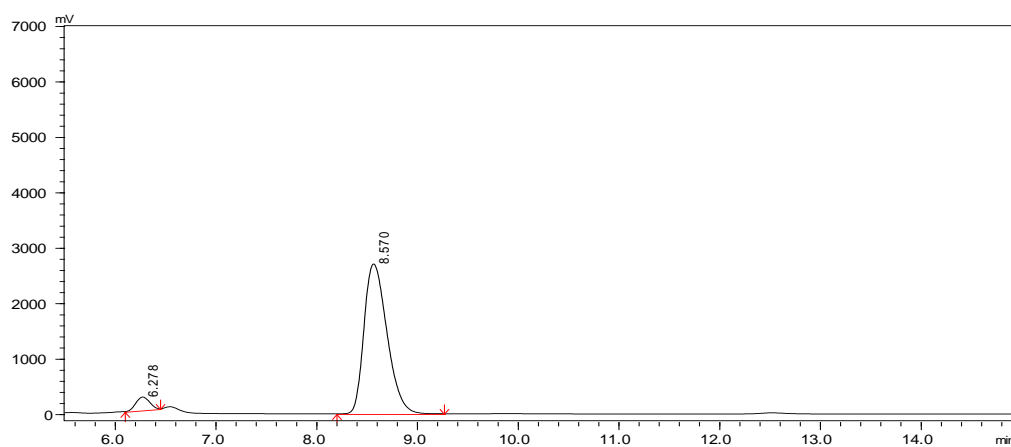

| #     | Ret Time (min) | Height (μV) | Area (μV.sec) | Area (%) |
|-------|----------------|-------------|---------------|----------|
| 1     | 6.278          | 236525      | 2226875       | 4.934    |
| 2     | 8.570          | 2702701     | 42907033      | 95.066   |
| total |                | 2939226     | 45133907      | 100.000  |

HPLC chromatogram of compound **57** (97% ee)

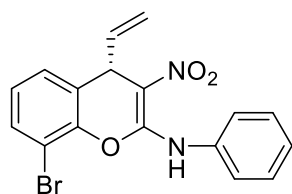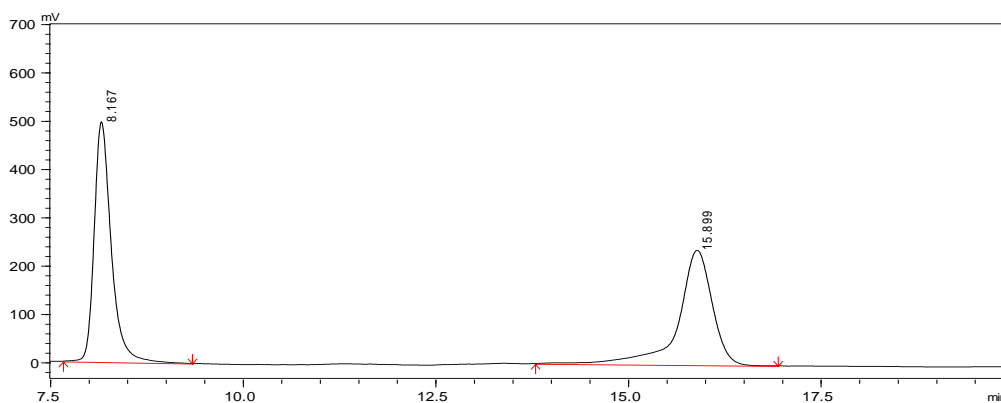

| #     | Ret Time (min) | Height (μV) | Area (μV.sec) | Area (%) |
|-------|----------------|-------------|---------------|----------|
| 1     | 8.167          | 497054      | 7628208       | 51.158   |
| 2     | 15.899         | 237588      | 7282936       | 48.842   |
| total |                | 734642      | 14911144      | 100.000  |

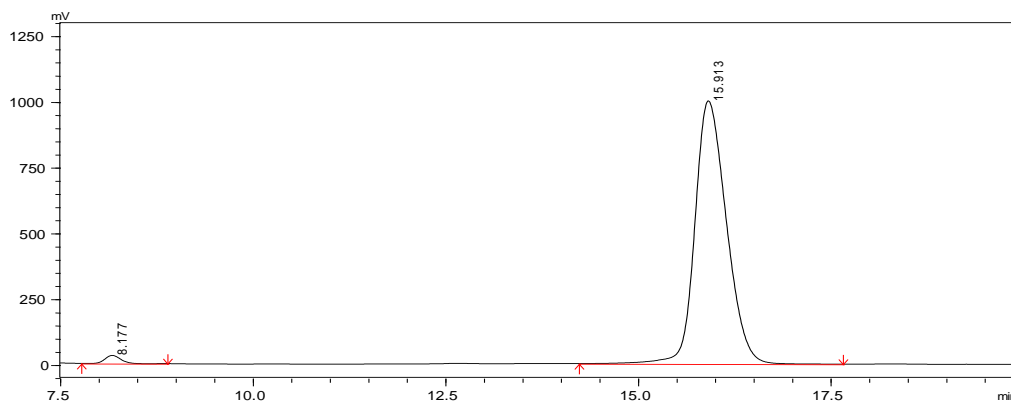

| #     | Ret Time (min) | Height (μV) | Area (μV.sec) | Area (%) |
|-------|----------------|-------------|---------------|----------|
| 1     | 8.177          | 30456       | 410294        | 1.422    |
| 2     | 15.913         | 999409      | 28436709      | 98.578   |
| total |                | 1029865     | 28847003      | 100.000  |

HPLC chromatogram of compound **58** (61% ee)

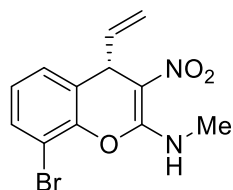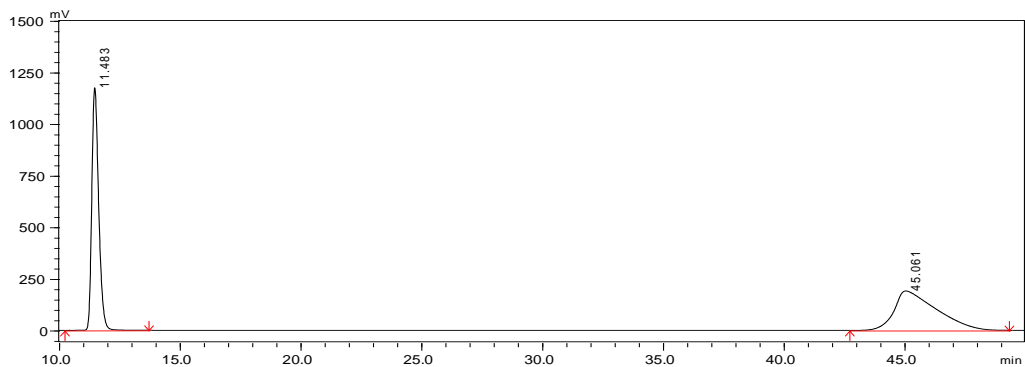

| #     | Ret Time (min) | Height (μV) | Area (μV.sec) | Area (%) |
|-------|----------------|-------------|---------------|----------|
| 1     | 11.483         | 1175022     | 23270458      | 50.077   |
| 2     | 45.061         | 190944      | 23198612      | 49.923   |
| total |                | 1365966     | 46469070      | 100.000  |

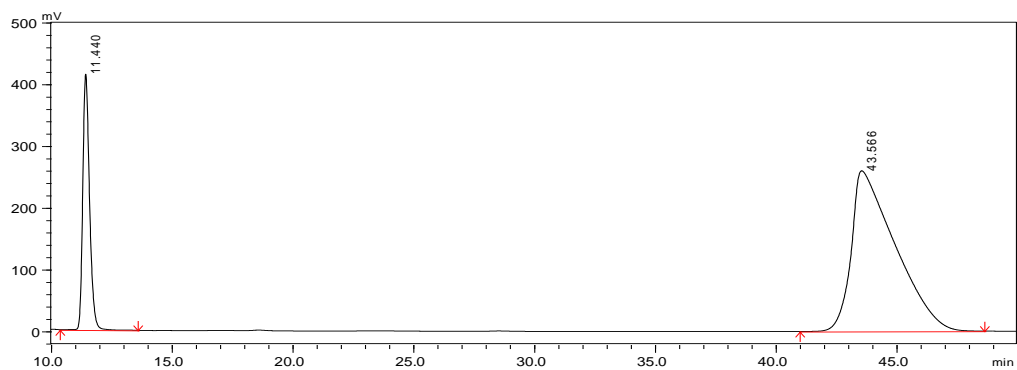

| #     | Ret Time (min) | Height (μV) | Area (μV.sec) | Area (%) |
|-------|----------------|-------------|---------------|----------|
| 1     | 11.440         | 413950      | 8064769       | 19.713   |
| 2     | 43.566         | 259863      | 32846614      | 80.287   |
| total |                | 673814      | 40911383      | 100.000  |

HPLC chromatogram of compound **59** (59% ee)

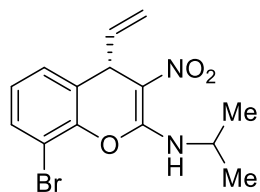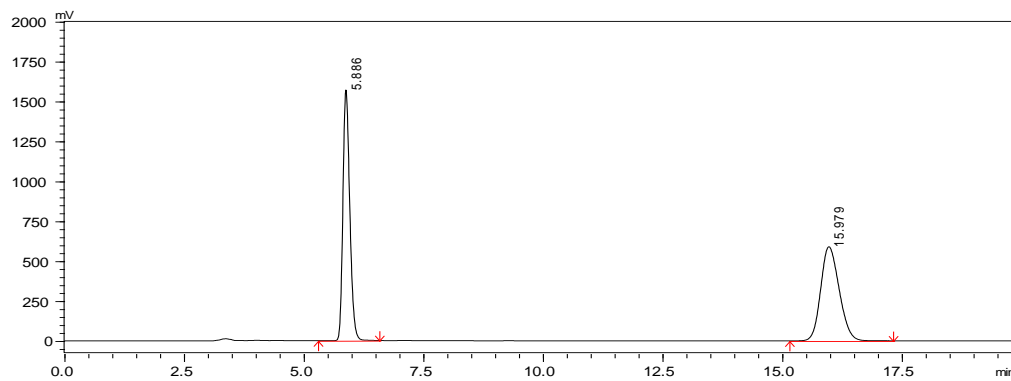

| #     | Ret Time (min) | Height ( $\mu$ V) | Area ( $\mu$ V.sec) | Area (%) |
|-------|----------------|-------------------|---------------------|----------|
| 1     | 5.886          | 1570205           | 15690538            | 49.865   |
| 2     | 15.979         | 588768            | 15775576            | 50.135   |
| total |                | 2158974           | 31466114            | 100.000  |

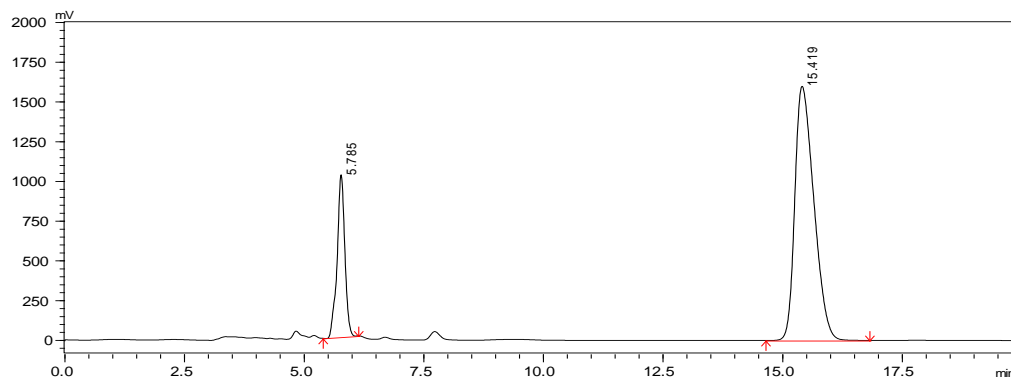

| #     | Ret Time (min) | Height ( $\mu$ V) | Area ( $\mu$ V.sec) | Area (%) |
|-------|----------------|-------------------|---------------------|----------|
| 1     | 5.785          | 1021280           | 11426360            | 20.560   |
| 2     | 15.419         | 1599034           | 44149104            | 79.440   |
| total |                | 2620314           | 55575464            | 100.000  |

HPLC chromatogram of compound **60** (99% ee)

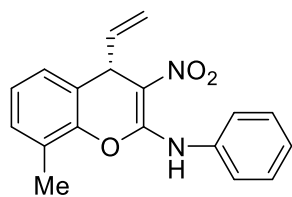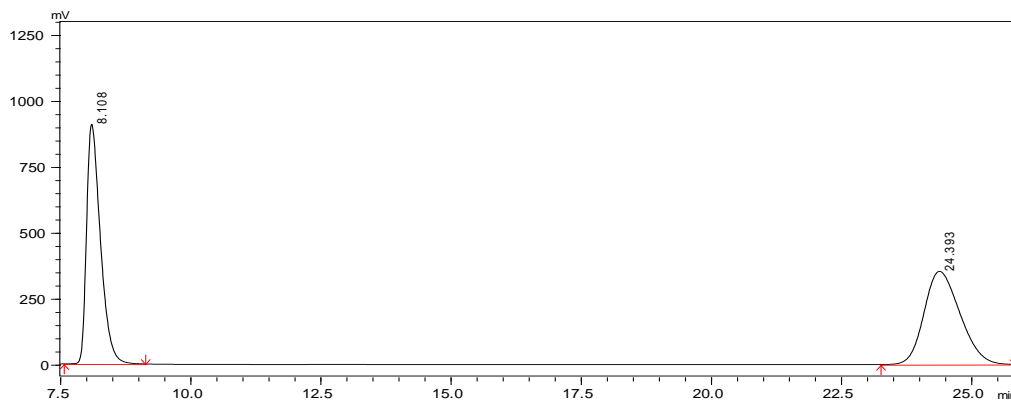

| #     | Ret Time (min) | Height ( $\mu\text{V}$ ) | Area ( $\mu\text{V}\cdot\text{sec}$ ) | Area (%) |
|-------|----------------|--------------------------|---------------------------------------|----------|
| 1     | 8.108          | 908409                   | 16853260                              | 49.917   |
| 2     | 24.393         | 352874                   | 16909509                              | 50.083   |
| total |                | 1261282                  | 33762770                              | 100.000  |

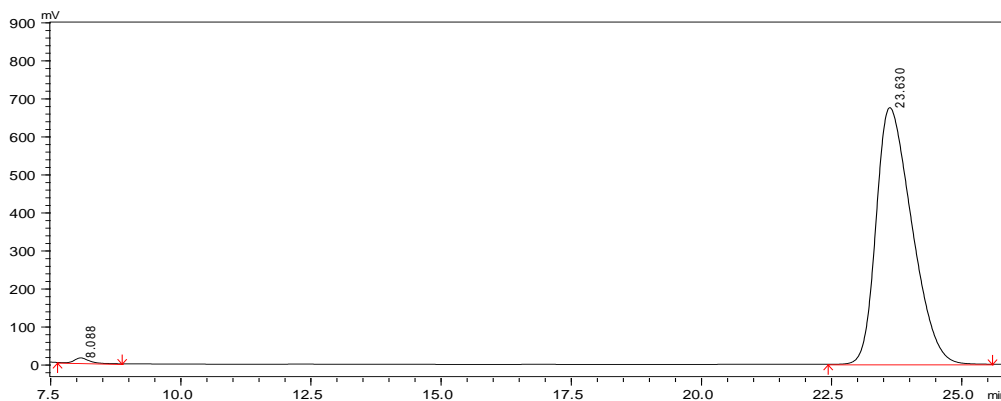

| #     | Ret Time (min) | Height ( $\mu\text{V}$ ) | Area ( $\mu\text{V}\cdot\text{sec}$ ) | Area (%) |
|-------|----------------|--------------------------|---------------------------------------|----------|
| 1     | 8.088          | 13319                    | 231900                                | 0.716    |
| 2     | 23.630         | 674766                   | 32145773                              | 99.284   |
| total |                | 688086                   | 32377673                              | 100.000  |

HPLC chromatogram of compound **61** (62% ee)

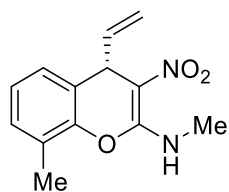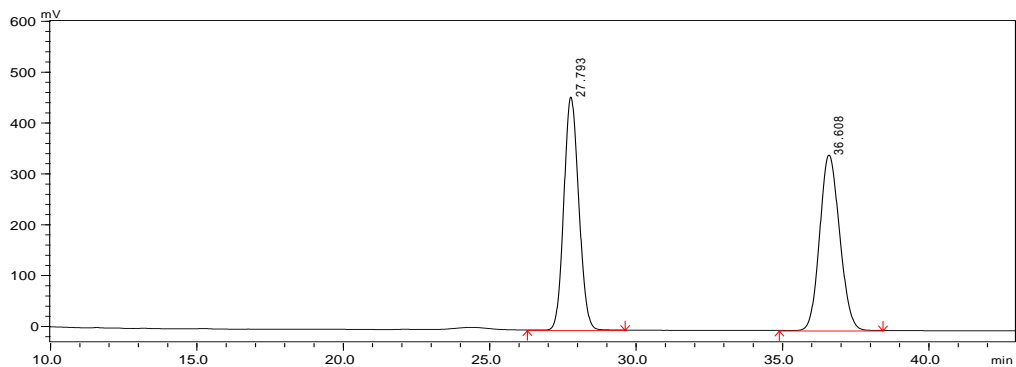

| #     | Ret Time (min) | Height (μV) | Area (μV.sec) | Area (%) |
|-------|----------------|-------------|---------------|----------|
| 1     | 27.793         | 458182      | 16246322      | 49.902   |
| 2     | 36.608         | 344859      | 16309828      | 50.098   |
| total |                | 803041      | 32556150      | 100.000  |

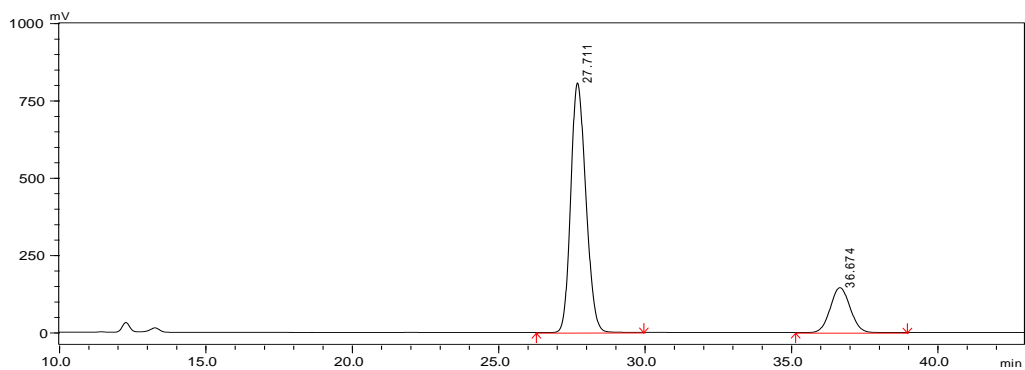

| #     | Ret Time (min) | Height (μV) | Area (μV.sec) | Area (%) |
|-------|----------------|-------------|---------------|----------|
| 1     | 27.711         | 806834      | 29002216      | 80.901   |
| 2     | 36.674         | 145284      | 6846785       | 19.099   |
| total |                | 952118      | 35849001      | 100.000  |

HPLC chromatogram of compound **62** (55% ee)

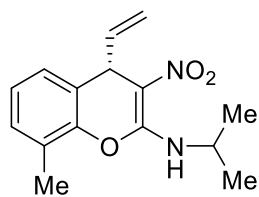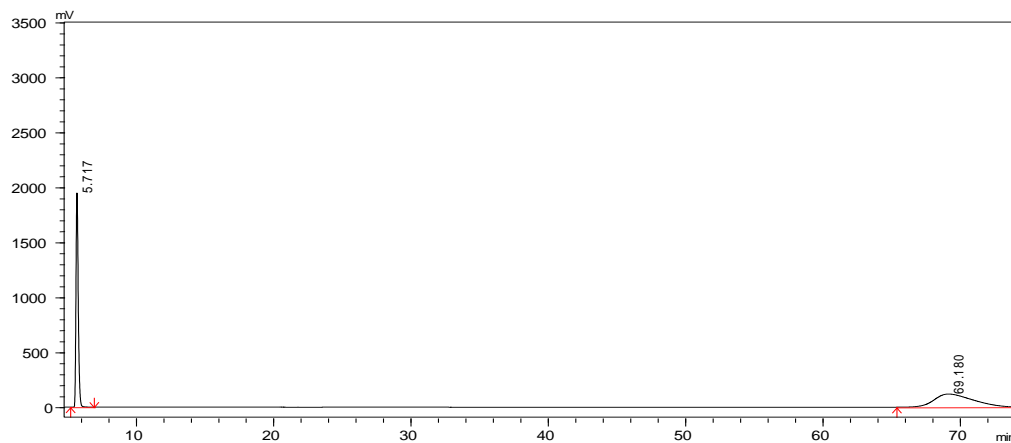

| #     | Ret Time (min) | Height (μV) | Area (μV.sec) | Area (%) |
|-------|----------------|-------------|---------------|----------|
| 1     | 5.717          | 1947162     | 22420905      | 49.127   |
| 2     | 69.180         | 119070      | 23217326      | 50.873   |
| total |                | 2066232     | 45638232      | 100.000  |

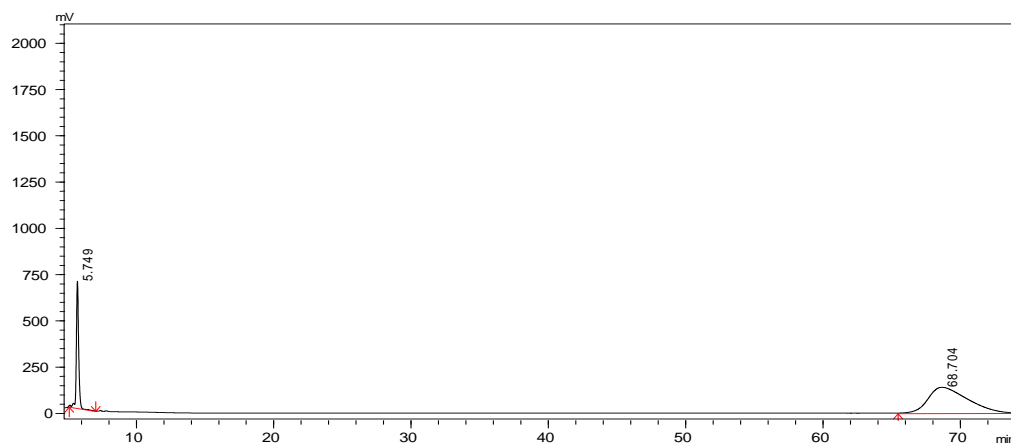

| #     | Ret Time (min) | Height (μV) | Area (μV.sec) | Area (%) |
|-------|----------------|-------------|---------------|----------|
| 1     | 5.749          | 685279      | 7890151       | 22.302   |
| 2     | 68.704         | 139018      | 27488918      | 77.698   |
| total |                | 824297      | 35379069      | 100.000  |



HPLC chromatogram of compound **63** (88% ee)

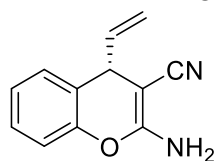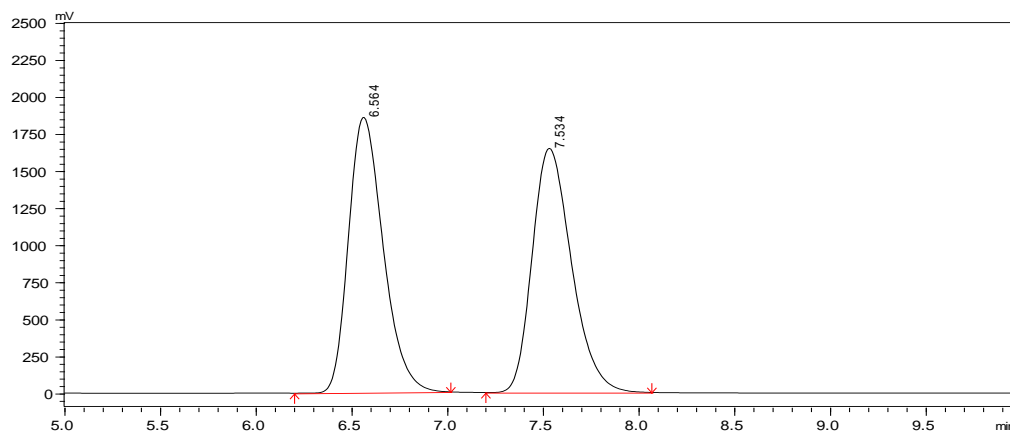

| #     | Ret Time (min) | Height (μV) | Area (μV.sec) | Area (%) |
|-------|----------------|-------------|---------------|----------|
| 1     | 6.564          | 1856976     | 23418372      | 49.904   |
| 2     | 7.534          | 1646764     | 23508269      | 50.096   |
| total |                | 3503741     | 46926641      | 100.000  |

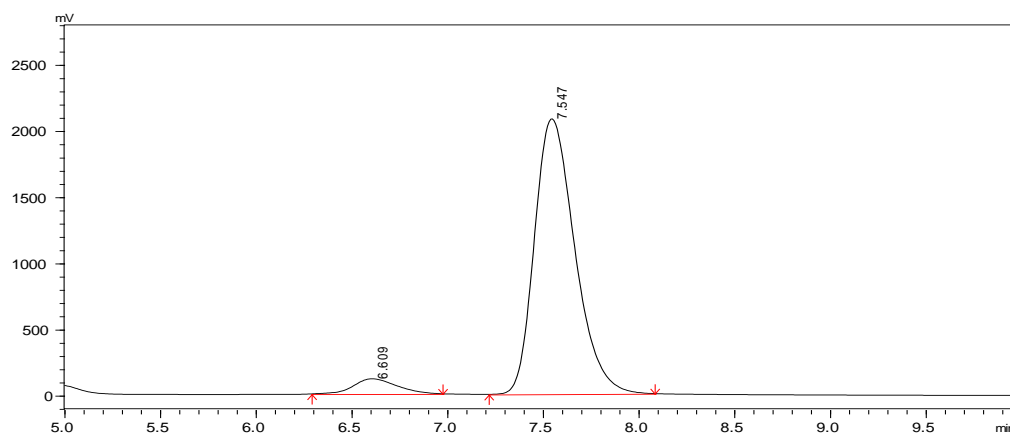

| #     | Ret Time (min) | Height (μV) | Area (μV.sec) | Area (%) |
|-------|----------------|-------------|---------------|----------|
| 1     | 6.609          | 114134      | 1781156       | 5.522    |
| 2     | 7.547          | 2080142     | 30475161      | 94.478   |
| total |                | 2194276     | 32256317      | 100.000  |

HPLC chromatogram of compound **64** (89% ee)

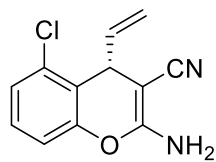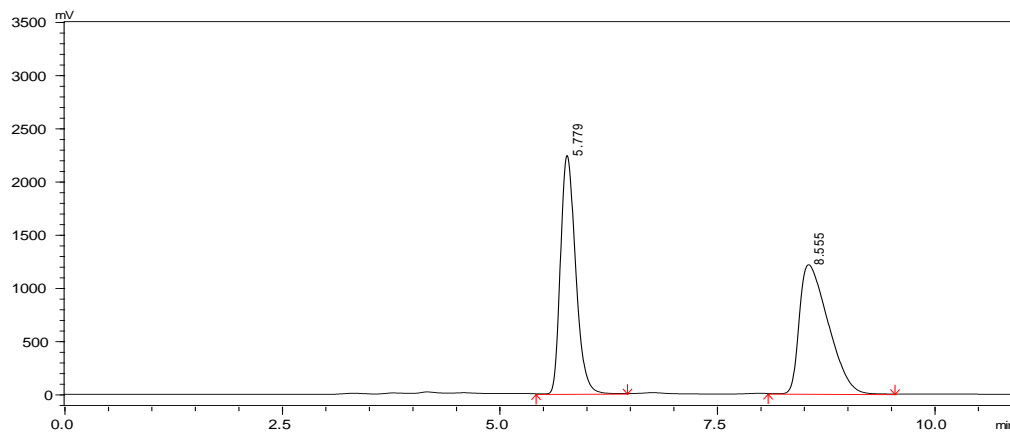

| #     | Ret Time (min) | Height (μV) | Area (μV.sec) | Area (%) |
|-------|----------------|-------------|---------------|----------|
| 1     | 5.779          | 2236953     | 27021428      | 49.337   |
| 2     | 8.555          | 1211549     | 27747133      | 50.663   |
| total |                | 3448503     | 54768561      | 100.000  |

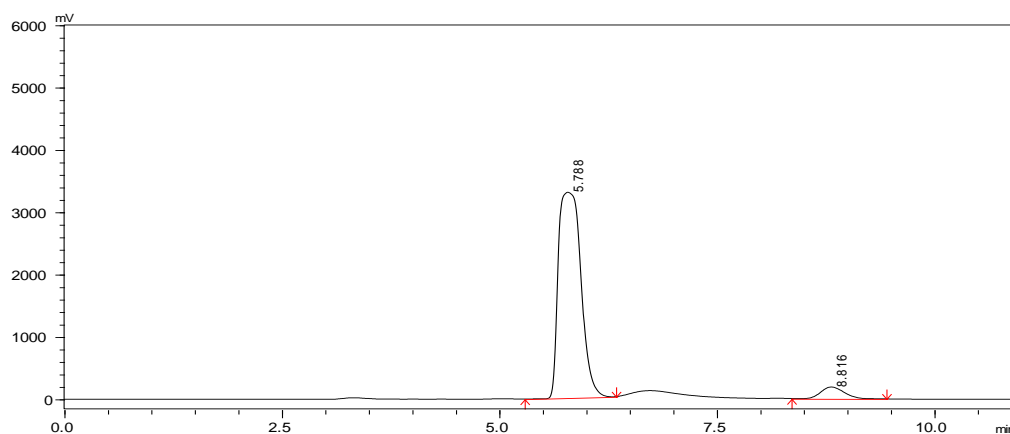

| #     | Ret Time (min) | Height (μV) | Area (μV.sec) | Area (%) |
|-------|----------------|-------------|---------------|----------|
| 1     | 5.788          | 3297332     | 59363782      | 94.491   |
| 2     | 8.816          | 187183      | 3460987       | 5.509    |
| total |                | 3484515     | 62824769      | 100.000  |

HPLC chromatogram of compound **65** (71% ee)

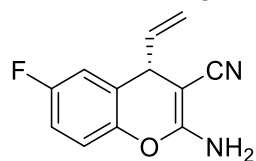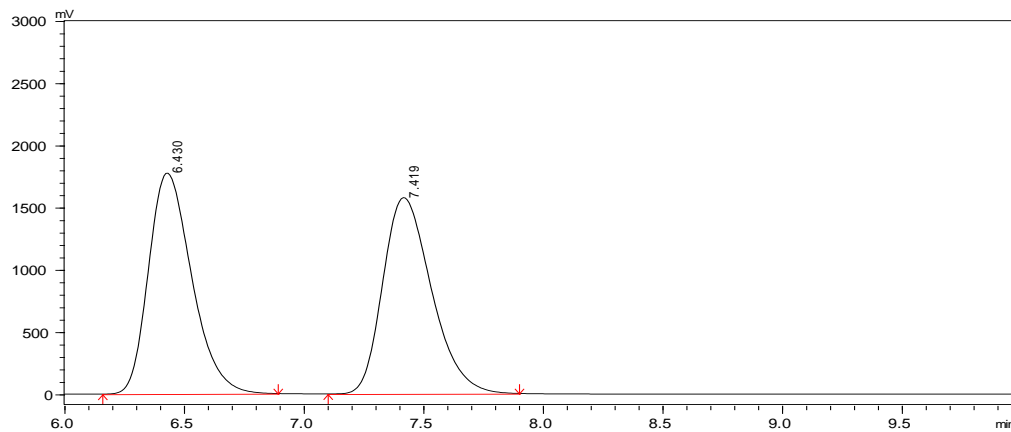

| #     | Ret Time (min) | Height (μV) | Area (μV.sec) | Area (%) |
|-------|----------------|-------------|---------------|----------|
| 1     | 6.430          | 1773485     | 22275325      | 49.984   |
| 2     | 7.419          | 1575834     | 22289470      | 50.016   |
| total |                | 3349319     | 44564796      | 100.000  |

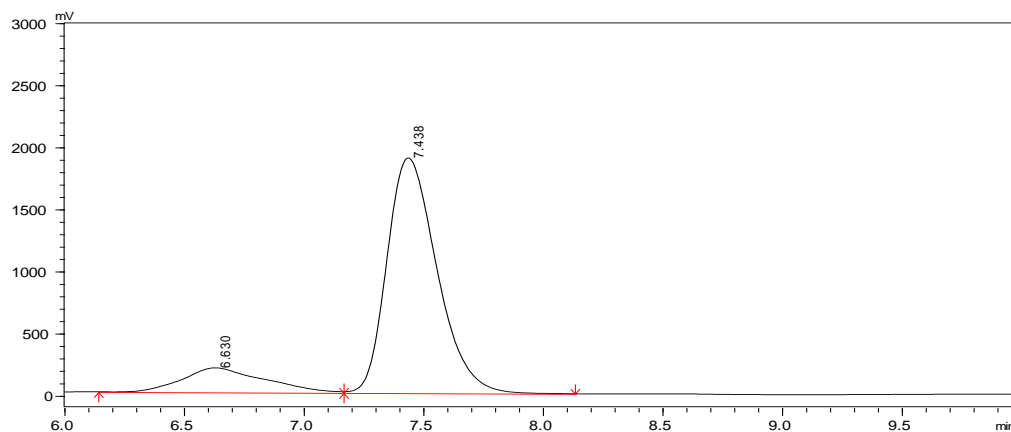

| #     | Ret Time (min) | Height (μV) | Area (μV.sec) | Area (%) |
|-------|----------------|-------------|---------------|----------|
| 1     | 6.630          | 196880      | 4666152       | 14.517   |
| 2     | 7.438          | 1893389     | 27476572      | 85.483   |
| total |                | 2090270     | 32142724      | 100.000  |

HPLC chromatogram of compound **66** (90% ee)

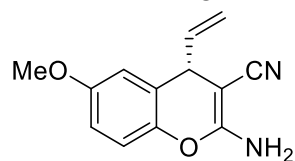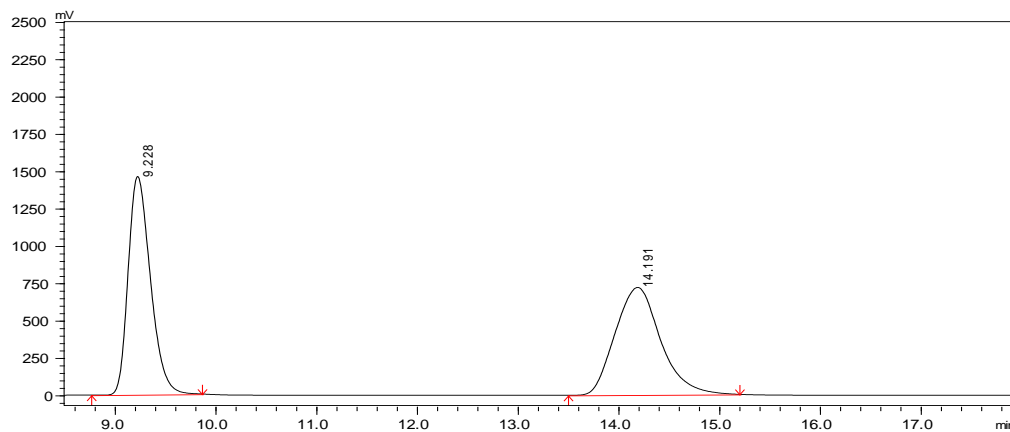

| #     | Ret Time (min) | Height (μV) | Area (μV.sec) | Area (%) |
|-------|----------------|-------------|---------------|----------|
| 1     | 9.228          | 1459811     | 22419007      | 49.852   |
| 2     | 14.191         | 719611      | 22552535      | 50.148   |
| total |                | 2179422     | 44971542      | 100.000  |

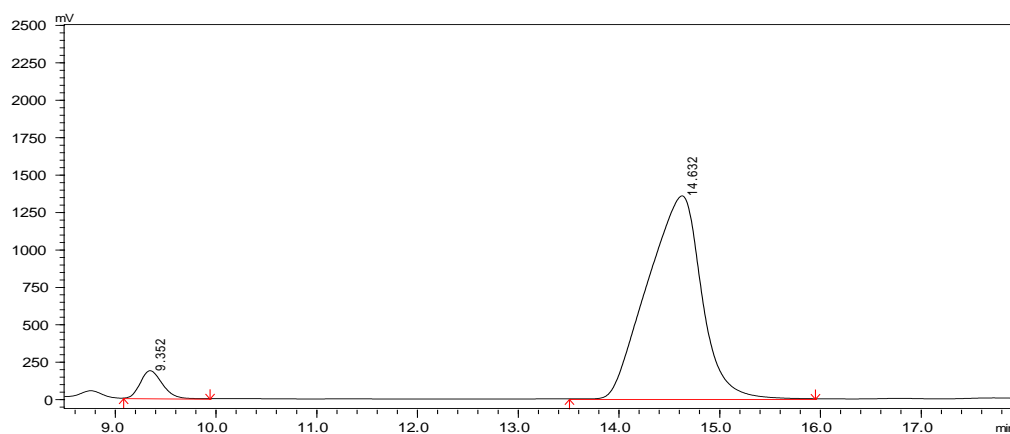

| #     | Ret Time (min) | Height (μV) | Area (μV.sec) | Area (%) |
|-------|----------------|-------------|---------------|----------|
| 1     | 9.352          | 184317      | 2753668       | 5.176    |
| 2     | 14.632         | 1355056     | 50450040      | 94.824   |
| total |                | 1539373     | 53203709      | 100.000  |

HPLC chromatogram of compound **67** (96% ee)

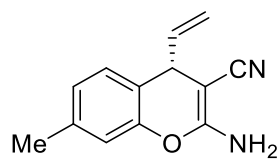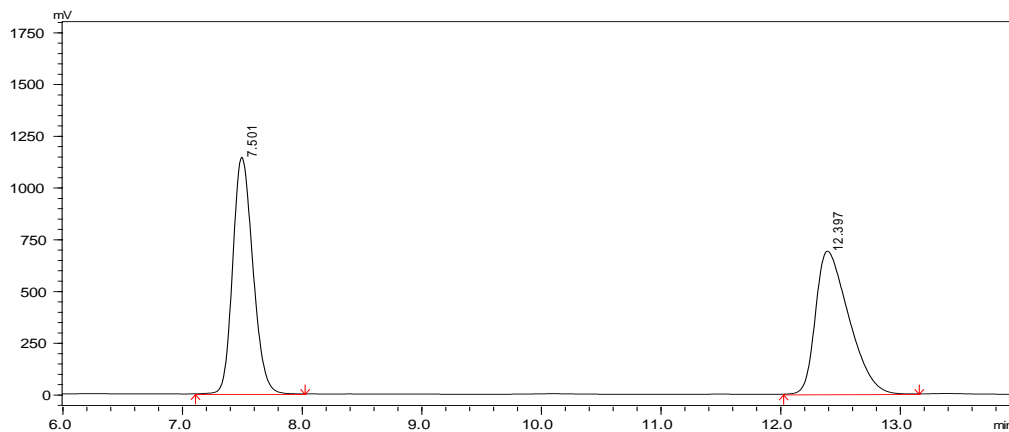

| #     | Ret Time (min) | Height ( $\mu\text{V}$ ) | Area ( $\mu\text{V}\cdot\text{sec}$ ) | Area (%) |
|-------|----------------|--------------------------|---------------------------------------|----------|
| 1     | 7.501          | 1143863                  | 13386782                              | 50.084   |
| 2     | 12.397         | 690661                   | 13342135                              | 49.916   |
| total |                | 1834524                  | 26728917                              | 100.000  |

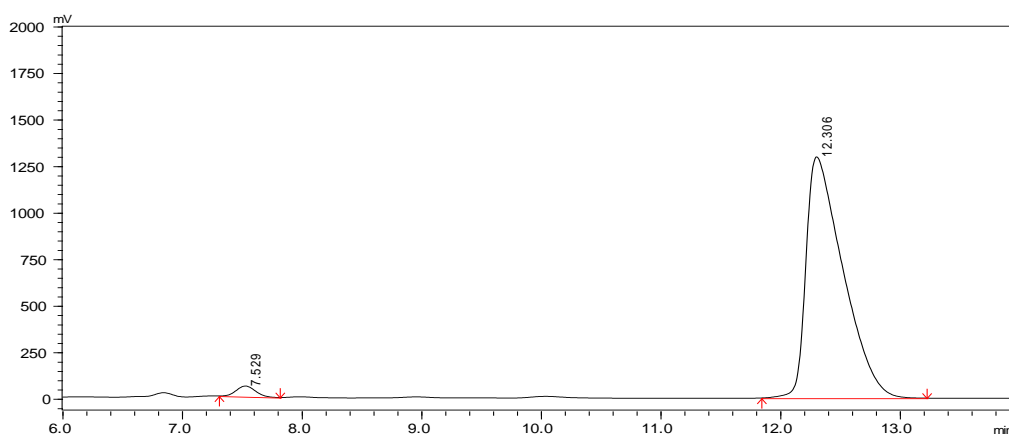

| #     | Ret Time (min) | Height ( $\mu\text{V}$ ) | Area ( $\mu\text{V}\cdot\text{sec}$ ) | Area (%) |
|-------|----------------|--------------------------|---------------------------------------|----------|
| 1     | 7.529          | 56993                    | 629319                                | 2.212    |
| 2     | 12.306         | 1295780                  | 27822376                              | 97.788   |
| total |                | 1352773                  | 28451695                              | 100.000  |

HPLC chromatogram of compound **68** (97% ee)

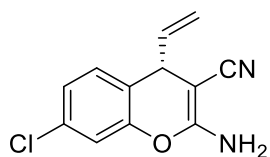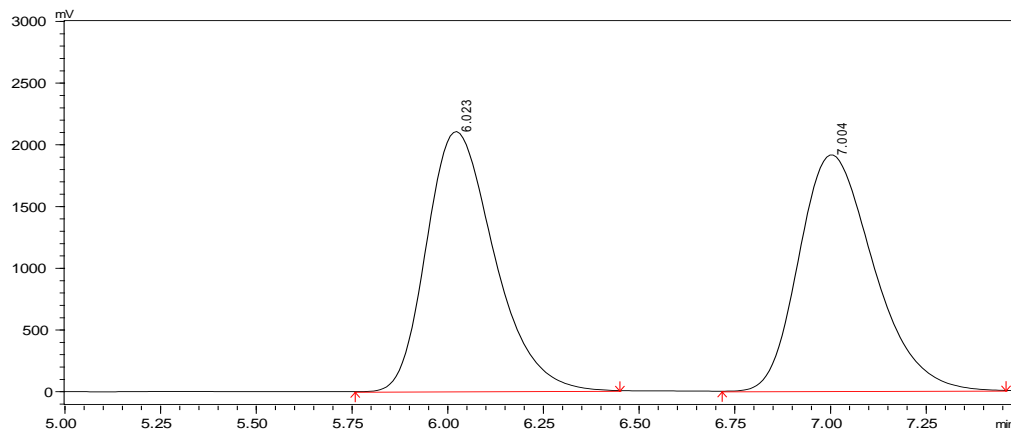

| #     | Ret Time (min) | Height (μV) | Area (μV.sec) | Area (%) |
|-------|----------------|-------------|---------------|----------|
| 1     | 6.023          | 2103387     | 25870332      | 49.934   |
| 2     | 7.004          | 1910976     | 25938503      | 50.066   |
| total |                | 4014363     | 51808835      | 100.000  |

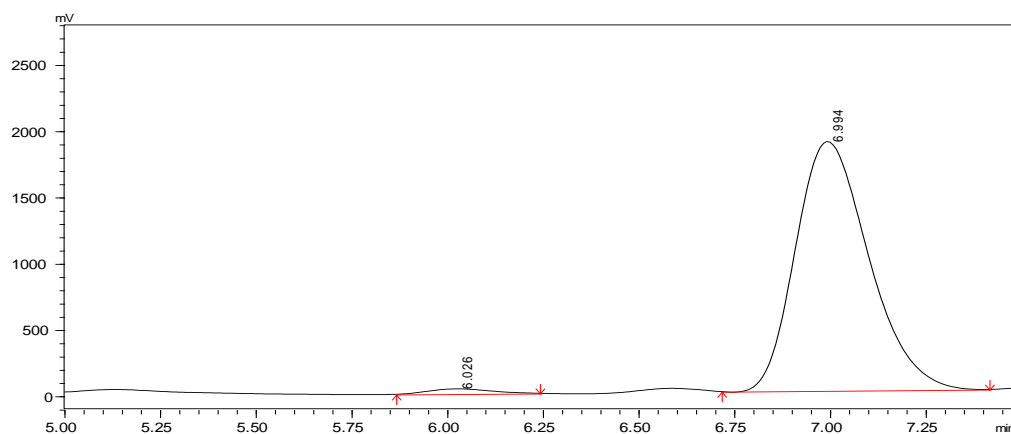

| #     | Ret Time (min) | Height (μV) | Area (μV.sec) | Area (%) |
|-------|----------------|-------------|---------------|----------|
| 1     | 6.026          | 38104       | 416645        | 1.642    |
| 2     | 6.994          | 1879884     | 24963842      | 98.358   |
| total |                | 1917988     | 25380487      | 100.000  |

HPLC chromatogram of compound **69** (95% ee)

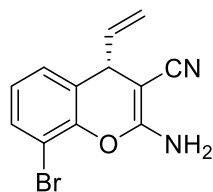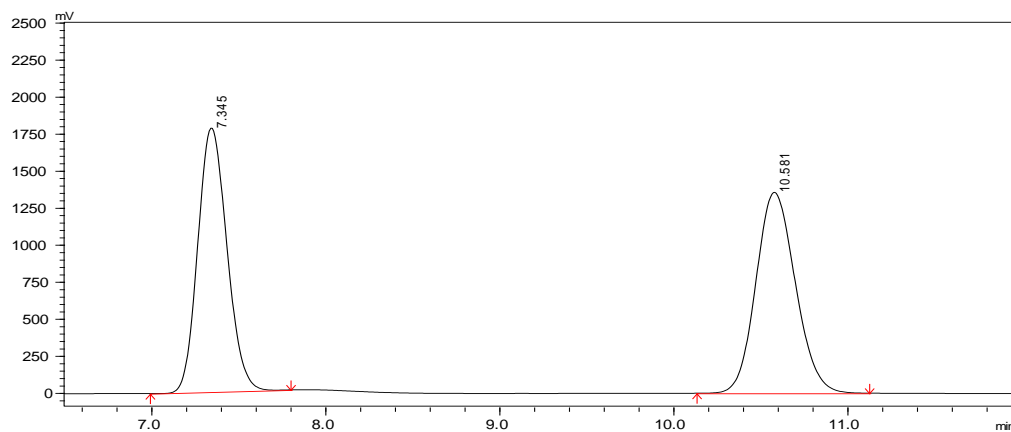

| #     | Ret Time (min) | Height (μV) | Area (μV.sec) | Area (%) |
|-------|----------------|-------------|---------------|----------|
| 1     | 7.345          | 1781443     | 20733076      | 49.209   |
| 2     | 10.581         | 1356084     | 21399858      | 50.791   |
| total |                | 3137528     | 42132934      | 100.000  |

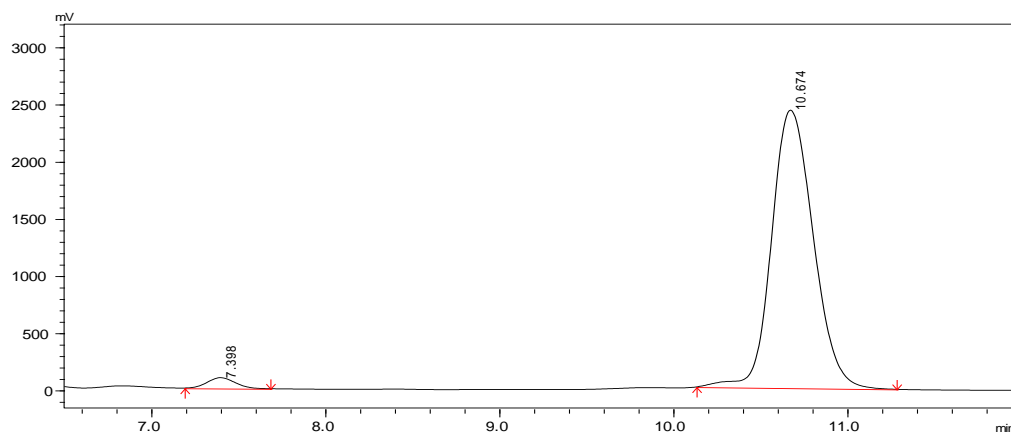

| #     | Ret Time (min) | Height (μV) | Area (μV.sec) | Area (%) |
|-------|----------------|-------------|---------------|----------|
| 1     | 7.398          | 92826       | 1024113       | 2.463    |
| 2     | 10.674         | 2430202     | 40555189      | 97.537   |
| total |                | 2523028     | 41579302      | 100.000  |

HPLC chromatogram of compound **70** (87% ee)

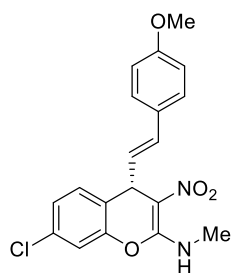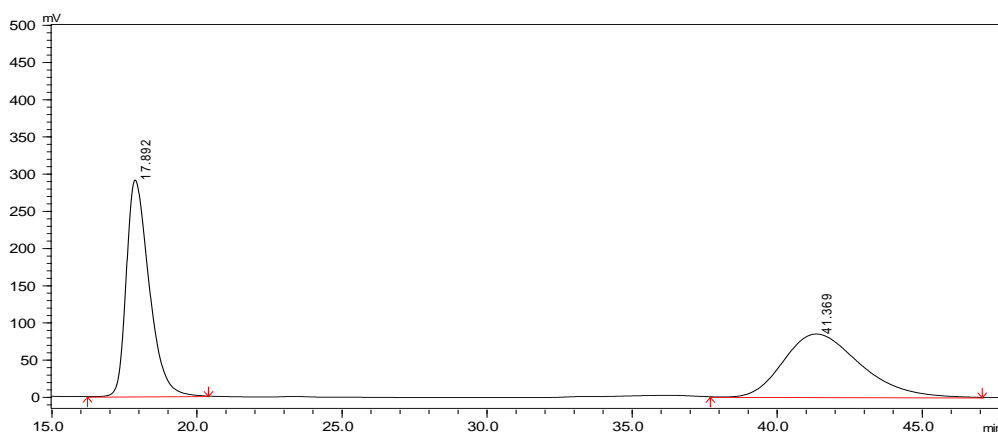

| #     | Ret Time (min) | Height (μV) | Area (μV.sec) | Area (%) |
|-------|----------------|-------------|---------------|----------|
| 1     | 17.892         | 290743      | 15895387      | 50.736   |
| 2     | 41.369         | 84643       | 15434384      | 49.264   |
| total |                | 375386      | 31329771      | 100.000  |

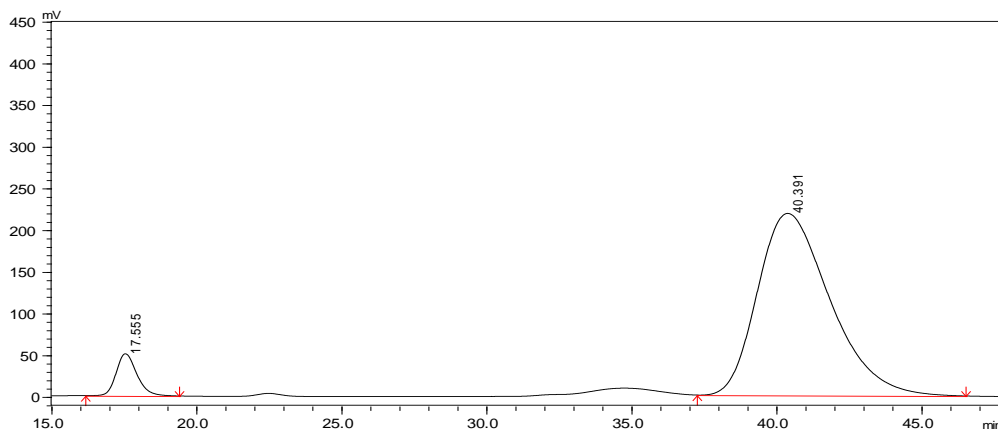

| #     | Ret Time (min) | Height (μV) | Area (μV.sec) | Area (%) |
|-------|----------------|-------------|---------------|----------|
| 1     | 17.555         | 50411       | 2496822       | 6.177    |
| 2     | 40.391         | 218234      | 37925402      | 93.823   |
| total |                | 268645      | 40422224      | 100.000  |



HPLC chromatogram of compound **71** (88% ee, 6:1 dr)

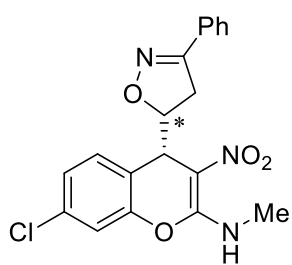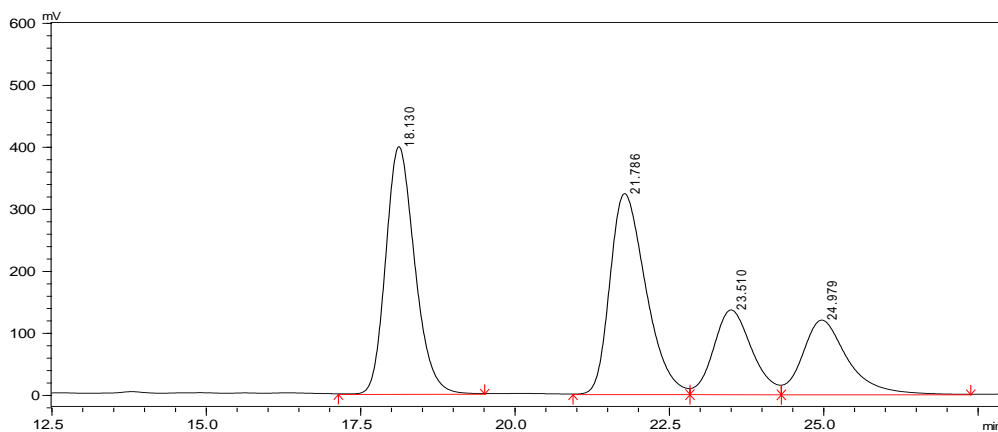

| #     | Ret Time (min) | Height (μV) | Area (μV.sec) | Area (%) |
|-------|----------------|-------------|---------------|----------|
| 1     | 18.130         | 398418      | 12998543      | 34.355   |
| 2     | 21.786         | 323321      | 13040919      | 34.467   |
| 3     | 23.510         | 135789      | 5810826       | 15.358   |
| 4     | 24.979         | 119483      | 5985219       | 15.819   |
| total |                | 977011      | 37835507      | 100.000  |

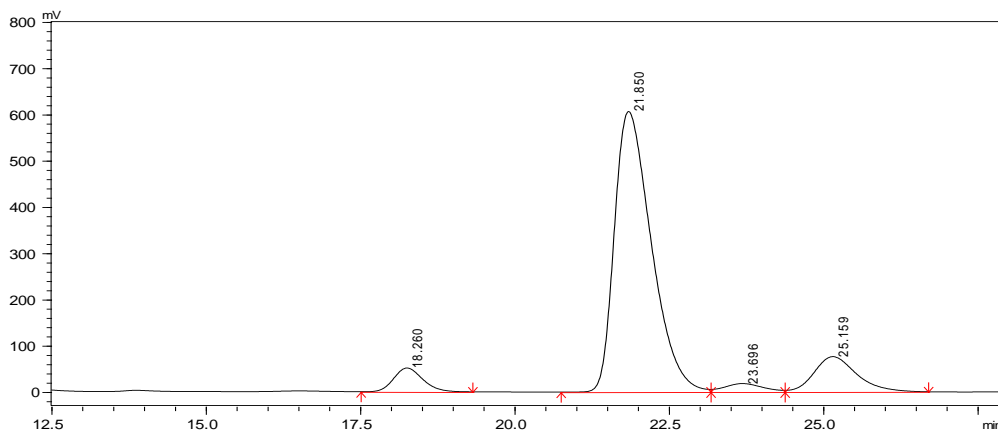

| #     | Ret Time (min) | Height (μV) | Area (μV.sec) | Area (%) |
|-------|----------------|-------------|---------------|----------|
| 1     | 18.260         | 51291       | 1674975       | 5.348    |
| 2     | 21.850         | 606359      | 25232907      | 80.561   |
| 3     | 23.696         | 17977       | 772535        | 2.466    |
| 4     | 25.159         | 76066       | 3640882       | 11.624   |
| total |                | 751693      | 31321299      | 100.000  |
